# Supplementary material for: Highly enantioselective Rh-catalyzed asymmetric reductive dearomatization of multi-nitrogen polycyclic pyrazolo[1,5-a]pyrimidines
Source: Royal Society of Chemistry journal article supplement (doi:10.1039/d3sc02086j), 2023-01-01
Supplement: d3sc02086j1.pdf [file d3sc02086j1.pdf]

*Supporting Information for:*

**Highly Enantioselective Rh-catalyzed Asymmetric Reductive Dearomatization of  
Multi-nitrogen Polycyclic Pyrazolo[1,5-*a*]pyrimidines**

Chaochao Xie,<sup>[a]</sup> Guiying Xiao,<sup>[a]</sup> Qianling Guo,<sup>[a]</sup> Xiaoxue Wu,<sup>[a]</sup> Guofu Zi,<sup>[a]</sup> Wanjian Ding,<sup>\*[a]</sup> and Guohua Hou<sup>\*[a][b]</sup>

[a] Key Laboratory of Radiopharmaceuticals, College of Chemistry, Beijing Normal University, Beijing 100875, China

[b] Shanghai Key Laboratory for Molecular Engineering of Chiral Drugs, School of Chemistry and Chemical Engineering, Shanghai Jiao Tong University, Shanghai 200240, China

**CONTENTS**

|                                                                                                          |      |
|----------------------------------------------------------------------------------------------------------|------|
| 1. Experimental Section .....                                                                            | S2   |
| 2. General Procedure for Synthesis of Substrates <b>1</b> , <b>3</b> and <b>5</b> .....                  | S2   |
| 3. General procedure for asymmetric hydrogenation of compounds <b>1</b> , <b>3</b> and <b>5</b> .....    | S8   |
| 4. Experimental operation of catalyst loading on substrates <b>1t</b> and <b>5j</b> .....                | S10  |
| 5. Optimizing Reaction Conditions .....                                                                  | S11  |
| 6. The Characterization Data for Substrates .....                                                        | S12  |
| 7. NMR, SFC and HPLC, optical rotation and HRMS Data of compounds <b>2</b> , <b>4</b> and <b>6</b> ..... | S25  |
| 8. NMR, SFC and HPLC spectra of compounds .....                                                          | S45  |
| 9. X-ray crystallographic analysis of compound <b>4c</b> .....                                           | S184 |
| 10. DFT calculations .....                                                                               | S185 |

## 1. Experimental Section

### General Information:

All the air or moisture sensitive reactions and manipulations were performed by using standard Schlenk techniques and in a nitrogen-filled glovebox.  $^1\text{H}$  NMR,  $^{13}\text{C}$  NMR and  $^{19}\text{F}$  NMR spectra were recorded on Bruker AV (400 MHz) spectrometers and JEOL JNM-ECX600P and JNM-ECS600 (400 MHz or 600 MHz) spectrometers.  $\text{CDCl}_3$  was the solvent used for the NMR analysis, with TMS as the internal standard. Chemical shifts were reported upfield to TMS (0.00 ppm) for  $^1\text{H}$  NMR. Data is represented as follows: chemical shift, integration, multiplicity (s = singlet, d = doublet, dd = double of doublets, t = triplet, q = quartet, m = multiplet) and coupling constants (J) in Hertz (Hz). Optical rotation was determined using Autopol III Automatic polarimeter (Rudolph research Analytical). GC analysis was conducted on an Agilent 7890A series instrument. HPLC analysis was conducted on Agilent 1260 series instrument. SFC analysis was conducted on Agilent 1260 series instrument. HRMS were recorded on a Waters LCT Premier XE mass spectrometer with APCI or ESI.

### 2. General Procedure for Synthesis of Substrates 1, 3 and 5.

**Method A:** **1a-1n** were prepared by the following protocol.<sup>[1]</sup>

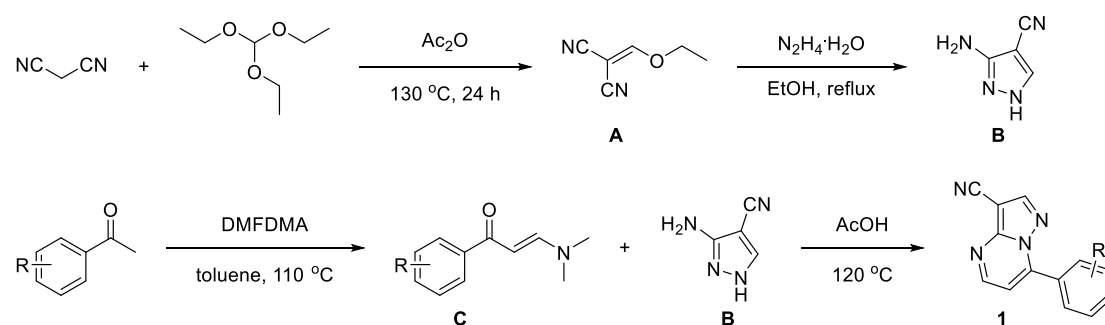

An equimolar amount of malononitrile (20 mmol, 1.0 equiv.) and triethyorthoformate (20 mmol, 1.0 equiv.) were heated at 130 °C in  $\text{Ac}_2\text{O}$  (30 mL) for 24 h to ensure complete conversion. After completion of the reaction, acetic anhydride was evaporated under reduced pressure, and the crude product was purified by column chromatography to obtain product **A** in 85% yield.

To a solution of compound **A** (20 mmol, 1.0 equiv.) in ethanol (20 mL) was added hydrazinium hydroxide solution (30 mmol, 1.5 equiv.). The mixture was stirred at room temperature for 16 h then was concentrated to give the crude product and washed with MeOH (30 mL) to afford product **B** in 80% yield.

To a mixture of aryl ethanone (10 mmol, 1.0 equiv.) in dry toluene (50 mL) was added 1,1-dimethoxy-N,N-dimethylmethanamine (DMF-DMA, 15 mmol, 1.5 equiv.), and the mixture was heated under reflux at 100 °C for 6–12 h. The solvent was evaporated, and the residual viscous liquid was dissolved in ether. The resulting solids were collected by filtration, washed thoroughly with ether, dried, and finally recrystallized from EtOH to afford aryl enaminones **C**.

To a solution of aryl enaminones **C** (10 mmol, 1.0 equiv.) in AcOH (15 mL) was added compound **B** (10 mmol, 1.0 equiv.). The mixture was stirred at 120 °C for 4 h. Then the reaction mixture was concentrated to a residue and partitioned between ethyl acetate (100 mL) and brine (100 mL). Organic layer was separated, washed with brine (2x100 mL), dried over sodium sulfate and concentrated, and the crude product was purified by column chromatography to obtain product **1**.

**Method B:** **1o** were prepared by the following protocol.<sup>[2]</sup>

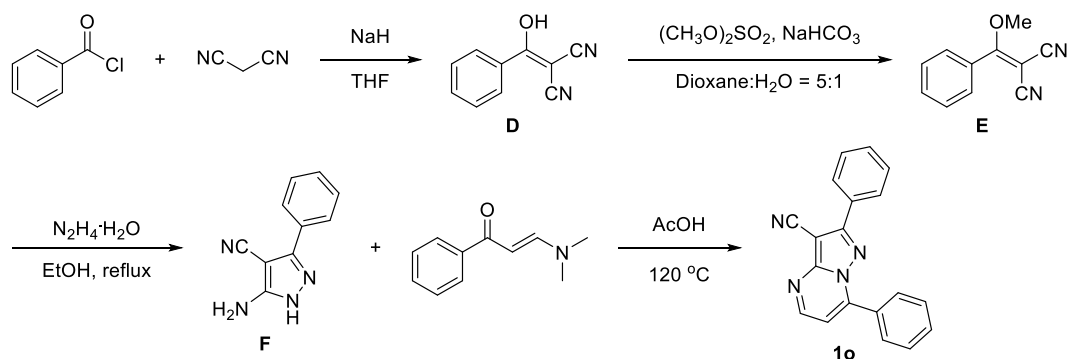

Sodium hydride (21 mmol, 2.1 equiv.) was suspended in dry THF (10 mL) and the mixture was cooled to 0 °C. Malononitrile (10 mmol, 1.0 equiv.) was dissolved in dry THF (15 mL) and added dropwise to the stirring sodium hydride mixture in THF over 20 min. Benzoyl chloride (11 mmol, 1.1 equiv.) was dissolved in dry THF (15 mL) and added dropwise to the stirring malononitrile mixture over 30 min. The reaction was allowed to warm to room temperature and stirred for an additional 30 min. Then, it was acidified with 1N HCl to pH 2. The mixture was extracted with ethyl acetate (60 mL)

and dried over anhydrous sodium sulfate. The ethyl acetate was evaporated under reduced pressure and the compound was purified by silica gel column chromatography using ethyl acetate as the eluent to afford **D** in 88% yield.

Sodium bicarbonate (80 mmol, 8.0 equiv.) was added over 10 min to a solution of **D** (10 mmol, 1.0 equiv.) in dioxane (40 mL) and water (8 mL). Dimethyl sulfate (50 mmol, 5.0 equiv.) was added to the reaction mixture and the solution was heated to reflux with vigorous stirring for 3 h. The reaction mixture was cooled, diluted with water (40 mL), and extracted with diethyl ether (50 mL). The organic layer was dried with anhydrous sodium sulfate and evaporated under reduced pressure. The residue was purified by silica gel column chromatography using dichloromethane and methanol to afford **E** in 75% yield.

To a solution of compound **E** (10 mmol, 1.0 equiv.) in ethanol (20 mL) was added hydrazinium hydroxide solution (15 mmol, 1.5 equiv.). The mixture was stirred at room temperature for 16 h then was concentrated to give the crude product and washed with MeOH (30 mL) to afford product **F**.

To a solution of aryl enaminones (10 mmol, 1.0 equiv.) in AcOH (15 mL) was added compound **F** (10 mmol, 1.0 equiv.). The mixture was stirred at 120 °C for 4 h. Then the reaction mixture was concentrated to a residue and partitioned between ethyl acetate (100 mL) and brine (100 mL). Organic layer was separated, washed with brine (2x100 mL), dried over sodium sulfate and concentrated, and the crude product was purified by column chromatography to obtain product **1o** in 70% yield.

**Method C:** **1p** were prepared by the following protocol.<sup>[3]</sup>

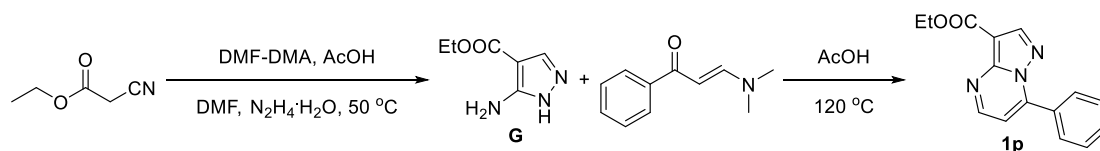

To a solution of ethyl cyanoacetate (10 mmol, 1.0 equiv.) in 10 mL dimethylformamide (DMF) was added glacial acetic acid (4 mmol, 0.4 equiv.) followed by  $N_2, N$ -dimethylformamide dimethylacetal (15 mmol, 1.5 equiv.) drop wise at room temperature and stirred for 1 h. To the resultant pale yellow color solution was added hydrazinium hydroxide solution (20 mmol, 2.0 equiv.) drop wise at 0 °C and the



reaction medium was stirred for 2 h at 50 °C. After completion of the reaction, the reaction medium was diluted with water and extracted with 2 × 70 mL of ethyl acetate. The combined organic layer was dried over sodium sulfate, filtered, and concentrated under reduced pressure to obtain the crude product as pale brown liquid. The crude product was further purified by column chromatography over silica gel, eluted with chloroform/methanol to afford the compound **G** as a white solid.

The next synthesis method refers to the synthesis of substrate **1o**.

**Method D:** **1r** were prepared by the following protocol.<sup>[4]</sup>

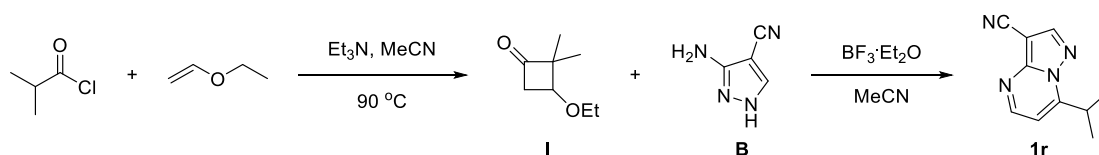

To a flame dried 100 mL three necked round bottom flask equipped with a stir bar was added triethylamine (24 mmol, 1.2 equiv.) and ethyl vinyl ether (40 mmol, 2.0 equiv.) in 20 mL acetonitrile under N<sub>2</sub>. Then, a solution of isobutyryl chloride (20 mmol, 1.0 equiv.) in acetonitrile (10 mL) was added dropwise to resulting mixture at reflux. The mixture was stirred at reflux for 2~3 h, resulting in a white precipitate. Upon completion of the reaction, the white precipitate (protonated triethyl amine) was filtered. The filtered was washed with water and brine, dried over anhydrous Na<sub>2</sub>SO<sub>4</sub>. The solvent was evaporated under reduced pressure and the crude product was purified by flash column chromatograph to give the desired product **I** in 55% yield.

BF<sub>3</sub>•Et<sub>2</sub>O (1.0 mmol, 1.0 equiv.) was added to a mixture of compound **B** (1.0 mmol, 1.0 equiv.), cyclobutanones **I** (1.5 mmol, 1.5 equiv.), MeCN (5 mL). Then the sealed tube was stirred at 80 °C for 6 h. Upon completion of the reaction, the solvent was evaporated under reduced pressure and the residue was purified by flash column chromatograph to give the desired product **1s** in 51% yield.

**Method E:** **1t** were prepared by the following protocol.<sup>[1]</sup>

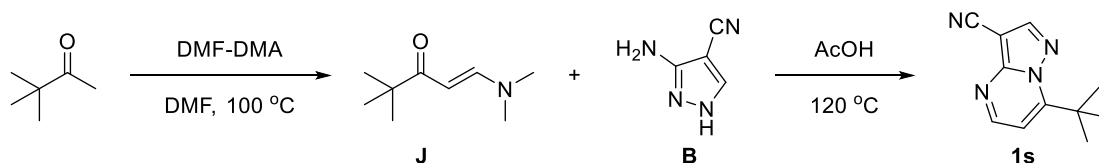

To a mixture of pinacolone (10 mmol, 1.0 equiv.) in dry DMF (50 mL) was added 1,1-dimethoxy-*N,N*-dimethylmethanamine (DMF-DMA, 15 mmol, 1.5 equiv.), and the mixture was heated under reflux at 100 °C for 6–12 h. Upon completion of the reaction, the solvent was evaporated under reduced pressure and the residue was purified by flash column chromatograph to give the desired product **J** in 79% yield.

The next synthesis method refers to the synthesis of substrate **1o**.

**Method F:** **1t** were prepared by the following protocol.<sup>[5]</sup>

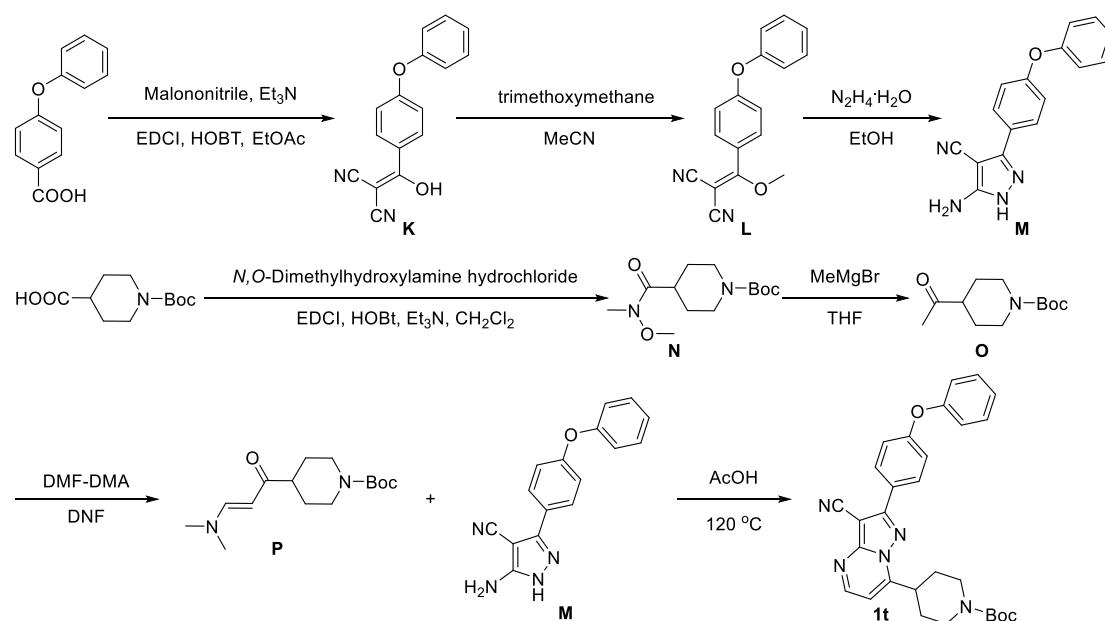

Under nitrogen atmosphere, to a solution of EtOAc (20 mL), HOBT (1-hydroxybenzotriazole, 1.2 equiv.), EDCI (1-ethyl-3-(3-dimethylaminopropyl)carbodiimide, 1.2 equiv.), 4-phenoxybenzoic acid (1.0 equiv.) and malononitrile (1.2 equiv.) was added Et<sub>3</sub>N (2.4 equiv.) at 10 °C. The mixture was then stirred at RT until the reaction was completed. The mixture was then centrifuged and the cake was washed with EtOAc. The filtrate was washed with aqueous NaHCO<sub>3</sub> twice and NH<sub>4</sub>Cl. The organic phase was washed with 1.5 N H<sub>2</sub>SO<sub>4</sub> twice and stirred. Concentrated and the residue was purified by flash column chromatograph to give the desired product **K**.

Under nitrogen atmosphere, a solution of compound **K** (1.0 equiv.) in MeCN was added into trimethoxymethane (1.5 equiv.) at 85 °C. The resultant mixture was stirred until the reaction was completed, the solvent was evaporated under reduced pressure

and the residue was purified by flash column chromatograph to give the desired product **L**.

Under nitrogen atmosphere, to a solution of compound **L** (1.0 equiv.) in ethanol hydrazinium hydroxide solution (1.0 equiv.) in ethanol was charged dropwise to the reactor below 15 °C. The solution was heated to RT and stirred until the reaction was completed. Water was added to the reactor. The solution was then cooled to 5 °C, centrifuged and the cake was washed with water. The cake was dried under vacuum. The crude product **M** can be directly used for the next reaction.

To a mixture of DCM, 1-(tert-butoxycarbonyl)piperidine-4-carboxylic acid (1.0 eq.), *N,O*-dimethylhydroxylamine hydrochloride (1.2 equiv.), HOBT (1.2 equiv.) and EDCI (1.2 equiv.), Et<sub>3</sub>N (2.6 equiv.) was charged dropwise below 15 °C, the mixture was stirred at RT until the reaction was completed, centrifuged and the cake was washed with DCM twice. The filtrate was washed with 20% aqueous NH<sub>4</sub>Cl. The filtrate was concentrated under vacuum to give the crude product **N**, which was used in the next step without further purification.

The residue was dissolved in toluene and THF cooled to 10 °C, charged dropwise MeMgBr (1.4 equiv.) at 10 °C and then stirred at RT until the reaction was completed. The solution was cooled below 10 °C. Saturated aqueous NH<sub>4</sub>Cl was charged dropwise below 10 °C. The mixture was centrifuged, separated, filtrated, and the organic phase was washed with aqueous NaCl twice. The organic phase was concentrated to give the crude product, which was used in the next step without further purification.

The next synthesis method refers to the synthesis of substrate **1**.

**Method G:** **3** were prepared by the following protocol.<sup>[6]</sup>

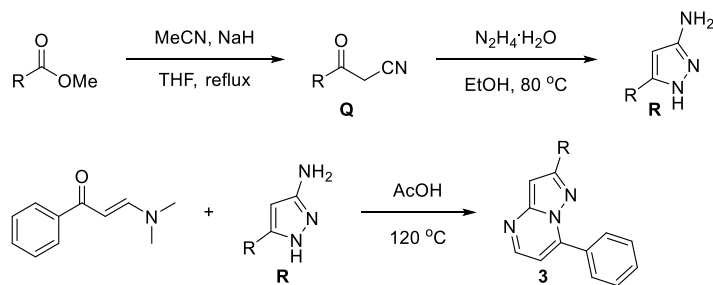

To a solution of acetonitrile (1.28g, 31.2 mmol, 2.0 equiv.) and NaH (1.56 g, 39.0 mmol, 2.5 equiv.) in 25 mL THF at room temperature was added a solution of methyl

formate (2.0 g, 15.6 mmol, 1.0 equiv.) in 15 mL THF dropwise. Then, maintaining the temperature at 80 °C. The reaction was stirred for 5 h before cooling to RT. Consumption of the starting material was monitored by TLC. The reaction mixture was quenched by 1N HCl at 0 °C, the aqueous phase was extracted with further ethyl acetate (3×30 mL), the combined organic phases were dried over Na<sub>2</sub>SO<sub>4</sub>, filtered and concentrated under reduced pressure. The residue was purified by flash column chromatograph to give the desired product **Q**.

The next synthesis method refers to the synthesis of substrate **1**.

**Method H:** **5** were prepared by the following protocol.<sup>[7]</sup>

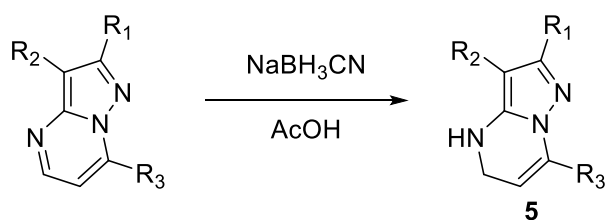

To a suspension of pyrazolo[1,5-a]pyrimidine (10 mmol) in 50 ml of acetic acid was added in portions of sodium cyanoborohydride (22 mmol) at room temperature under N<sub>2</sub>. The mixture was stirred at room temperature for 2 h. After removal of the volatile material in vacuo, 400 mL of ethyl acetate was added. The organic phase was neutralized with saturated sodium bicarbonate solution, washed with brine, dried over magnesium sulfate, filtered and concentrated in vacuo. The residue was purified by flash column chromatograph to give the desired product **5**.

### 3. General procedure for asymmetric hydrogenation of compounds **1**, **3** and **5**

At room temperature, [Rh(COD)Cl]<sub>2</sub> and (*S*)-DTBM-SEGPHOS were mixed in THF at a molar ratio of 1.0:2.2 for 20 minutes in a nitrogen-filled glove box to prepare a stock solution. An aliquot of the catalyst solution (1.0 mL THF, 0.0025 mmol) was transferred by syringe into the vials charged with different substrates **1** (0.125 mmol for each). The vials were then placed into a steel autoclave which hydrogen gas was charged. The reaction mixture was stirred under H<sub>2</sub> (80 atm) at 90 °C for 48 h for the substrates. The hydrogen gas was released slowly and carefully. The solution was

passed through a short column of silica gel to remove the metal complex. The conversion of products were determined by GC or  $^1\text{H}$  NMR analysis. The crude products were concentrated and purified by column chromatography and the ee values were determined by HPLC or SFC analysis on a chiral stationary phase.

At room temperature,  $[\text{Rh}(\text{COD})\text{Cl}]_2$  and (*S*)-DTBM-SEGPHOS were mixed in THF at a molar ratio of 1.1:2.4 for 20 minutes in a nitrogen-filled glove box to prepare a stock solution. An aliquot of the catalyst solution (1.0 mL THF, 0.00275 mmol) was transferred by syringe into the vials charged with different substrates **3** (0.125 mmol for each). The vials were then placed into a steel autoclave which hydrogen gas was charged. The reaction mixture was stirred under  $\text{H}_2$  (80 atm) at 90 °C for 48 h for the substrates. The hydrogen gas was released slowly and carefully. The solution was passed through a short column of silica gel to remove the metal complex. The conversion of products were determined by GC or  $^1\text{H}$  NMR analysis. The crude products were concentrated and purified by column chromatography and the ee values were determined by HPLC or SFC analysis on a chiral stationary phase.

At room temperature,  $[\text{Rh}(\text{COD})\text{Cl}]_2$  and (*S,S*)-f-spirophos were mixed in DCM at a molar ratio of 0.5:1.1 for 20 minutes in a nitrogen-filled glove box to prepare a stock solution. An aliquot of the catalyst solution (1.0 mL DCM, 0.00125 mmol) was transferred by syringe into the vials charged with different substrates **5** (0.125 mmol for each) in anhydrous DCM (2.0 ml), then add additives MPA ( *N*-methyl-*p*-anisidine, 0.125 mmol). The vials were then placed into a steel autoclave which hydrogen gas was charged. The reaction mixture was stirred under  $\text{H}_2$  (80 atm) at room temperature for 24 h for the substrates. The hydrogen gas was released slowly and carefully. The solution was passed through a short column of silica gel to remove the metal complex. The conversion of products were determined by GC or  $^1\text{H}$  NMR analysis. The crude products were concentrated and purified by column chromatography and the ee values were determined by HPLC or SFC analysis on a chiral stationary phase.

#### 4. Experimental operation of catalyst loading on substrates **1t** and **5j**

At room temperature,  $[\text{Rh}(\text{COD})\text{Cl}]_2$  and (*S*)-DTBM-SEGPHOS were mixed in THF at a molar ratio of 1.0:2.2 for 20 minutes in a nitrogen-filled glove box to prepare a stock solution. An aliquot of the catalyst solution (1.0 mL THF, 0.0025 mmol) was transferred by syringe into the vials charged with substrate **1t** (371.5 mg, 0.75 mmol) in anhydrous THF (4.0 ml). The vials were then placed into a steel autoclave which hydrogen gas was charged. The reaction mixture was stirred under  $\text{H}_2$  (80 atm) at 90 °C for 3 days. The hydrogen gas was released slowly and carefully. The solid was washed with DCM, and filtered to give the product **2t** as a white solid (359.5 mg, 96% yield) with 91% ee determined by HPLC with a chiral column.

At room temperature,  $[\text{Rh}(\text{COD})\text{Cl}]_2$  and (*S,S*)-f-spirophos were mixed in DCM at a molar ratio of 0.5:1.1 for 20 minutes in a nitrogen-filled glove box to prepare a stock solution. An aliquot of the catalyst solution (1.0 mL DCM, 0.00125 mmol) was transferred by syringe into the vials charged with substrate **5j** (375.0 mg, 1.25 mmol) in anhydrous DCM (4.0 ml), then add additives MPA ( *N*-methyl-*p*-anisidine, 17.1 mg, 0.125 mmol). The vials were then placed into a steel autoclave which hydrogen gas was charged. The reaction mixture was stirred under  $\text{H}_2$  (80 atm) at 60 °C for 4 days. The hydrogen gas was released slowly and carefully. The solid was washed with DCM, and filtered to give the product **6j** as a white solid (347.5 mg, 92% yield) with 94% ee determined by HPLC with a chiral column.

## 5. Optimizing Reaction Conditions <sup>a</sup>

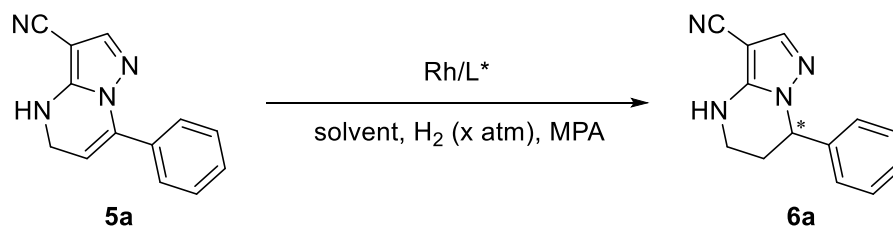

| entry                 | ligand    | solvent           | H <sub>2</sub> (atm) | conv <sup>b</sup> (%) | ee <sup>c</sup> (%) |
|-----------------------|-----------|-------------------|----------------------|-----------------------|---------------------|
| 1 <sup>d</sup>        | <b>L1</b> | THF               | 80                   | 40                    | 42                  |
| 2 <sup>e</sup>        | <b>L1</b> | THF               | 80                   | 97                    | 40                  |
| 3                     | <b>L1</b> | THF               | 80                   | 100                   | 64                  |
| 4                     | <b>L4</b> | THF               | 80                   | 100                   | 68                  |
| 5                     | <b>L5</b> | THF               | 80                   | 96                    | 37                  |
| 6                     | <b>L6</b> | THF               | 80                   | 100                   | 64                  |
| 7                     | <b>L7</b> | THF               | 80                   | 100                   | 73                  |
| 8                     | <b>L8</b> | THF               | 80                   | 100                   | 80                  |
| 9                     | <b>L8</b> | DCM               | 80                   | 100                   | 92                  |
| 10                    | <b>L8</b> | MeOH              | 80                   | trace                 | --                  |
| 11                    | <b>L8</b> | CHCl <sub>3</sub> | 80                   | trace                 | --                  |
| 12                    | <b>L8</b> | toluene           | 80                   | 100                   | 82                  |
| 13                    | <b>L8</b> | DCM               | 30                   | 100                   | 92                  |
| <b>14<sup>f</sup></b> | <b>L8</b> | <b>DCM</b>        | <b>80</b>            | <b>100</b>            | <b>94</b>           |

<sup>a</sup>Unless otherwise mentioned, all reactions were carried out with a [Rh(COD)Cl]<sub>2</sub>/diphosphine (monophosphine)/substrate/MPA = 0.5:1.1:100:100, 80 atm H<sub>2</sub>, 60 °C, 24 h. <sup>b</sup>Determined by GC analysis. <sup>c</sup>Determined by chiral supercritical fluid chromatography (SFC) using a chiral stationary phase. <sup>d</sup> Rh(cod)BF<sub>4</sub>, 80 atm H<sub>2</sub>, 60 °C, 24 h. <sup>e</sup> Rh(NBD)BF<sub>4</sub>, 80 atm H<sub>2</sub>, 60 °C, 24 h. <sup>f</sup> [Rh(COD)Cl]<sub>2</sub>, 80 atm H<sub>2</sub>, rt, 24 h.

## 6. The Characterization Data for Substrates

### 7-phenylpyrazolo[1,5-a]pyrimidine-3-carbonitrile (**1a**)

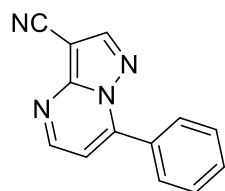

White solid; Yield: 70 %;  $^1\text{H}$  NMR (400 MHz, Chloroform-*d*)  $\delta$  8.76 (d,  $J = 4.39$  Hz, 1H), 8.41 (s, 1H), 8.08 – 7.89 (m, 2H), 7.60 (q,  $J = 6.70$  Hz, 3H), 7.16 (d,  $J = 4.47$  Hz, 1H).  $^{13}\text{C}$  NMR (101 MHz, Chloroform-*d*)  $\delta$  152.7, 151.4, 148.5, 147.1, 132.1, 129.5, 129.5, 129.0, 112.8, 109.9, 83.4.<sup>[8]</sup>

### 7-(*m*-tolyl)pyrazolo[1,5-a]pyrimidine-3-carbonitrile (**1b**)

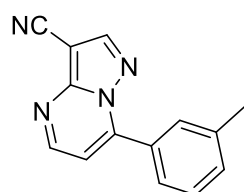

White solid; Yield: 66 %;  $^1\text{H}$  NMR (600 MHz, Chloroform-*d*)  $\delta$  8.78 (d,  $J = 4.19$  Hz, 1H), 8.36 (s, 1H), 7.50 (ddd,  $J = 7.69, 5.11, 3.73$  Hz, 1H), 7.40 (d,  $J = 7.44$  Hz, 1H), 7.38 – 7.36 (m, 2H), 7.04 (d,  $J = 4.25$  Hz, 1H).  $^{13}\text{C}$  NMR (151 MHz, Chloroform-*d*)  $\delta$  152.6, 150.8, 149.6, 147.4, 137.3, 131.3, 130.9, 129.9, 129.4, 126.4, 112.7, 111.4, 83.5, 19.8.<sup>[8]</sup>

### 7-(3-methoxyphenyl)pyrazolo[1,5-a]pyrimidine-3-carbonitrile (**1c**)

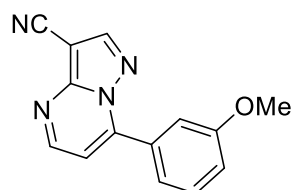

White solid; Yield: 65 %;  $^1\text{H}$  NMR (600 MHz, Chloroform-*d*)  $\delta$  8.74 (d,  $J = 4.41$  Hz, 1H), 8.40 (s, 1H), 7.56 – 7.51 (m, 2H), 7.48 (t,  $J = 7.89$  Hz, 1H), 7.16 (d,  $J = 4.44$  Hz, 1H), 7.13 (ddd,  $J = 8.09, 2.59, 1.13$  Hz, 1H), 3.87 (s, 3H).  $^{13}\text{C}$  NMR (151 MHz, Chloroform-*d*)  $\delta$  159.8, 152.7, 151.5, 148.4, 147.1, 130.7, 130.2, 121.8, 117.6, 115.3, 112.9, 110.0, 83.4, 55.6.<sup>[9]</sup>

### 7-(4-(*tert*-butyl)phenyl)pyrazolo[1,5-a]pyrimidine-3-carbonitrile (**1d**)

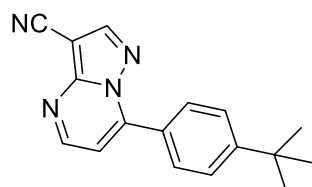

White solid; Yield: 68 %;  $^1\text{H}$  NMR (600 MHz, Chloroform-*d*)  $\delta$  8.74 (dd,  $J = 4.49, 1.12$  Hz, 1H), 8.41 (d,  $J = 1.36$  Hz, 1H), 8.02 – 7.91 (m, 2H), 7.65 – 7.54 (m, 2H), 7.15 (d,  $J = 3.7$  Hz, 1H), 1.1 (d,  $J = 0.98$  Hz, 9H).  $^{13}\text{C}$  NMR (151 MHz, Chloroform-*d*)  $\delta$  155.9, 152.7, 151.5, 148.6, 147.1, 129.3, 126.6, 126.1, 112.9, 109.6, 83.2, 35.2, 31.1. TOF-HRMS Calcd. for  $\text{C}_{17}\text{H}_{17}\text{N}_4$  [ $\text{M}+\text{H}^+$ ]: 277.1448, found 277.1451.



7-(3-chlorophenyl)pyrazolo[1,5-a]pyrimidine-3-carbonitrile (**1e**)

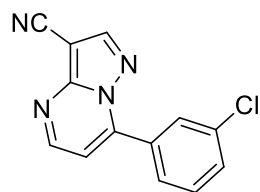

White solid; Yield: 77 %;  $^1\text{H}$  NMR (600 MHz, Chloroform-*d*)  $\delta$  8.78 (d,  $J = 4.35$  Hz, 1H), 8.43 (s, 1H), 8.01 (t,  $J = 1.93$  Hz, 1H), 7.90 (dt,  $J = 7.60, 1.27$  Hz, 1H), 7.60 (ddd,  $J = 8.10, 2.07, 1.10$  Hz, 1H), 7.54 (t,  $J = 7.90$  Hz, 1H), 7.16 (d,  $J = 4.36$  Hz, 1H).  $^{13}\text{C}$

NMR (151 MHz, Chloroform-*d*)  $\delta$  152.7, 151.4, 147.3, 147.0, 135.2, 132.1, 131.2, 130.3, 129.6, 127.7, 112.6, 110.0, 83.9.<sup>[8]</sup>

7-(3-fluorophenyl)pyrazolo[1,5-*a*]pyrimidine-3-carbonitrile (**1f**)

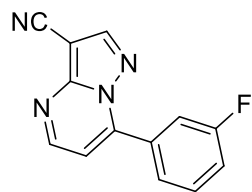

White solid; Yield: 80 %;  $^1\text{H}$  NMR (600 MHz, Chloroform-*d*)  $\delta$  8.78 (d,  $J = 4.39$  Hz, 1H), 8.43 (s, 1H), 7.83 – 7.75 (m, 2H), 7.58 (td,  $J = 8.18, 5.67$  Hz, 1H), 7.33 (tdd,  $J = 8.35, 2.55, 1.00$  Hz, 1H), 7.18 (d,  $J = 4.38$  Hz, 1H).  $^{13}\text{C}$  NMR (151 MHz, Chloroform-*d*)  $\delta$

162.6 (d,  $J = 247.6$  Hz), 152.6, 151.4, 147.2, 147.0, 131.3 (d,  $J = 8.4$  Hz), 130.8 (d,  $J = 7.6$  Hz), 125.3, 119.1 (d,  $J = 20.6$  Hz), 116.8 (d,  $J = 23.7$  Hz), 112.6, 110.0, 83.8.<sup>[9]</sup>

7-(3-bromophenyl)pyrazolo[1,5-*a*]pyrimidine-3-carbonitrile (**1g**)

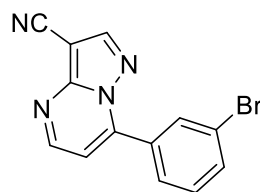

White solid; Yield: 78 %;  $^1\text{H}$  NMR (600 MHz, Chloroform-*d*)  $\delta$  8.78 (d,  $J = 4.39$  Hz, 1H), 8.43 (s, 1H), 8.16 (t,  $J = 1.86$  Hz, 1H), 7.95 (ddd,  $J = 7.84, 1.80, 1.01$  Hz, 1H), 7.75 (ddd,  $J = 8.02, 1.99, 1.02$  Hz, 1H), 7.47 (t,  $J = 7.93$  Hz, 1H), 7.15 (d,  $J = 4.38$  Hz, 1H).

$^{13}\text{C}$  NMR (151 MHz, Chloroform-*d*)  $\delta$  152.6, 151.4, 147.2, 146.8, 135.0, 132.4, 131.4, 130.5, 128.1, 123.0, 112.6, 110.0, 83.8.<sup>[10]</sup>

7-(4-fluorophenyl)pyrazolo[1,5-*a*]pyrimidine-3-carbonitrile (**1h**)

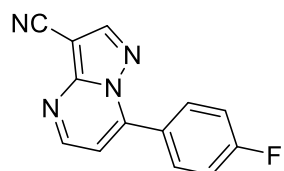

White solid; Yield: 77 %;  $^1\text{H}$  NMR (600 MHz, DMSO-*d*<sub>6</sub>)  $\delta$  8.86 (t,  $J = 5.31$  Hz, 1H), 8.82 (d,  $J = 6.24$  Hz, 1H), 8.15 (ddq,  $J = 8.70, 5.35, 3.31$  Hz, 2H), 7.55 (t,  $J = 5.87$  Hz, 1H), 7.44

(dtd,  $J = 8.84, 6.37, 5.91, 2.92$  Hz, 2H).  $^{13}\text{C}$  NMR (151 MHz, DMSO-*d*<sub>6</sub>)  $\delta$  165.2, 163.5, 154.2, 151.6, 147.7, 147.1, 133.0 (d,  $J = 8.8$  Hz), 126.4, 116.3, 116.2, 113.9, 111.1, 81.9.<sup>[10]</sup>

7-(4-chlorophenyl)pyrazolo[1,5-*a*]pyrimidine-3-carbonitrile (**1i**)

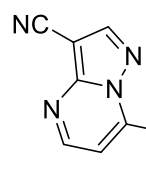

White solid; Yield: 78 %; <sup>1</sup>H NMR (600 MHz, Chloroform-*d*) δ 8.77 (d, *J* = 4.34 Hz, 1H), 8.42 (s, 1H), 7.98 (d, *J* = 8.15 Hz, 2H), 7.58 (d, *J* = 8.15 Hz, 2H), 7.15 (d, *J* = 4.43 Hz, 1H). <sup>13</sup>C NMR (151 MHz, Chloroform-*d*) δ 152.7, 151.5, 147.3, 147.2, 138.6, 130.9, 129.4, 127.9, 112.7, 109.7, 83.8.<sup>[8]</sup>

7-(4-bromophenyl)pyrazolo[1,5-*a*]pyrimidine-3-carbonitrile (**1j**)

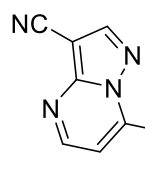

White solid; Yield: 73 %; <sup>1</sup>H NMR (600 MHz, Chloroform-*d*) δ 8.77 (d, *J* = 4.40 Hz, 1H), 8.42 (s, 1H), 7.95 – 7.85 (m, 2H), 7.77 – 7.70 (m, 2H), 7.15 (d, *J* = 4.39 Hz, 1H). <sup>13</sup>C NMR (151 MHz, Chloroform-*d*) δ 152.7, 151.5, 147.4, 147.2, 132.4, 131.0, 128.4, 127.0, 112.6, 109.7, 83.8.<sup>[8]</sup>

7-(2-methoxyphenyl)pyrazolo[1,5-*a*]pyrimidine-3-carbonitrile (**1k**)

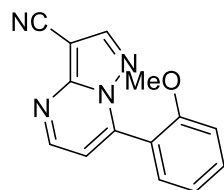

White solid; Yield: 65 %; <sup>1</sup>H NMR (600 MHz, Chloroform-*d*) δ 8.73 (d, *J* = 4.06 Hz, 1H), 8.33 (s, 1H), 7.57 (t, *J* = 7.96 Hz, 1H), 7.52 (d, *J* = 7.48 Hz, 1H), 7.18 – 7.05 (m, 3H), 3.78 (d, *J* = 1.88 Hz, 3H). <sup>13</sup>C NMR (151 MHz, Chloroform-*d*) δ 157.4, 152.3, 151.0, 147.0, 146.9, 133.1, 130.7, 120.9, 118.9, 113.0, 111.9, 111.8, 83.1, 55.8.

7-(2-fluorophenyl)pyrazolo[1,5-*a*]pyrimidine-3-carbonitrile (**1l**)

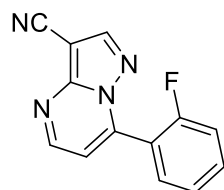

White solid; Yield: 76 %; <sup>1</sup>H NMR (600 MHz, Chloroform-*d*) δ 8.78 (d, *J* = 4.32 Hz, 1H), 8.38 (s, 1H), 7.76 (ddd, *J* = 7.64, 6.89, 1.77 Hz, 1H), 7.61 (dddd, *J* = 8.37, 7.26, 5.24, 1.77 Hz, 1H), 7.37 (td, *J* = 7.62, 1.10 Hz, 1H), 7.30 (ddd, *J* = 9.72, 8.42, 1.09 Hz, 1H), 7.18 (dd, *J* = 4.33, 1.15 Hz, 1H). <sup>13</sup>C NMR (151 MHz, Chloroform-*d*) δ 160.06 (d, *J* = 254.00 Hz), 152.4, 151.0, 147.1, 143.7, 133.8 (d, *J* = 8.72 Hz), 131.1, 124.7 (d, *J* = 3.65 Hz), 117.8 (d, *J* = 13.67 Hz), 116.7 (d, *J* = 21.11 Hz), 112.6, 111.8 (d, *J* = 3.61 Hz), 83.7.

7-(2-chlorophenyl)pyrazolo[1,5-a]pyrimidine-3-carbonitrile (**1m**)

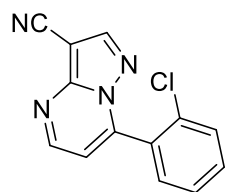

White solid; Yield: 73 %;  $^1\text{H}$  NMR (600 MHz, Chloroform-*d*)  $\delta$  8.81 (d,  $J = 4.29$  Hz, 1H), 8.37 (s, 1H), 7.60 (d,  $J = 7.93$  Hz, 1H), 7.56 (t,  $J = 7.72$  Hz, 1H), 7.53 (d,  $J = 7.52$  Hz, 1H), 7.48 (t,  $J = 7.52$  Hz, 1H), 7.12 (d,  $J = 4.26$  Hz, 1H).  $^{13}\text{C}$  NMR (151 MHz, Chloroform-*d*)  $\delta$  152.5, 150.7, 147.3, 146.4, 133.5, 132.5, 131.0, 130.5, 129.2, 127.3, 112.6, 111.8, 83.7.<sup>[8]</sup>

7-(2-bromophenyl)pyrazolo[1,5-a]pyrimidine-3-carbonitrile (**1n**)

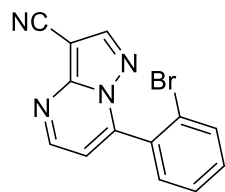

White solid; Yield: 80 %;  $^1\text{H}$  NMR (600 MHz, Chloroform-*d*)  $\delta$  8.80 (d,  $J = 4.22$  Hz, 1H), 8.35 (s, 1H), 7.92 – 7.67 (m, 1H), 7.56 – 7.51 (m, 1H), 7.49 – 7.43 (m, 2H), 7.10 (d,  $J = 4.24$  Hz, 1H).  $^{13}\text{C}$  NMR (151 MHz, Chloroform-*d*)  $\delta$  152.6, 150.7, 147.6, 147.3, 133.6, 132.6, 131.4, 131.1, 128.0, 122.7, 112.6, 111.8, 83.7.

2,7-diphenylpyrazolo[1,5-a]pyrimidine-3-carbonitrile (**1o**)

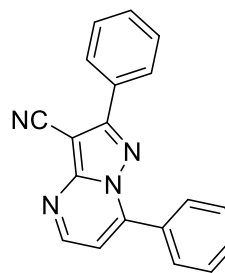

White solid; Yield: 70 %;  $^1\text{H}$  NMR (600 MHz, Chloroform-*d*)  $\delta$  8.72 (d,  $J = 4.44$  Hz, 1H), 8.24 – 8.15 (m, 2H), 8.15 – 8.04 (m, 2H), 7.61 (qd,  $J = 8.85, 7.87, 3.71$  Hz, 3H), 7.49 (q,  $J = 7.25, 6.69$  Hz, 3H), 7.15 (d,  $J = 4.43$  Hz, 1H).  $^{13}\text{C}$  NMR (151 MHz, Chloroform-*d*)  $\delta$  157.1, 153.4, 152.3, 147.9, 132.0, 130.6, 130.5, 129.7, 129.1, 128.9, 127.7, 114.1, 110.0, 80.4.<sup>[11]</sup>

ethyl 7-phenylpyrazolo[1,5-a]pyrimidine-3-carboxylate (**1p**)

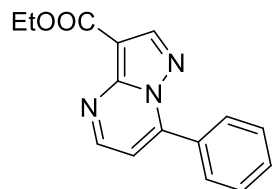

White solid; Yield: 73 %;  $^1\text{H}$  NMR (600 MHz, Chloroform-*d*)  $\delta$  8.78 (dd,  $J = 9.24, 4.39$  Hz, 1H), 8.58 (d,  $J = 7.40$  Hz, 1H), 8.06 – 7.92 (m, 2H), 7.62 – 7.51 (m, 3H), 7.05 (dd,  $J = 6.20, 4.30$  Hz, 1H), 4.43 (p,  $J = 7.35$  Hz, 2H), 1.40 (q,  $J = 7.21$  Hz, 3H).  $^{13}\text{C}$  NMR (151 MHz, Chloroform-*d*)  $\delta$  162.6, 152.4, 149.0, 148.0, 147.5, 131.6, 130.3, 129.5, 128.9, 60.5, 14.7.<sup>[12]</sup>

7-(pyridin-2-yl)pyrazolo[1,5-*a*]pyrimidine-3-carbonitrile (**1q**)

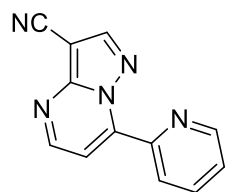

White solid; Yield: 66 %;  $^1\text{H}$  NMR (600 MHz, Chloroform-*d*)  $\delta$  8.97 (d,  $J = 8.17$  Hz, 1H), 8.83 (dd,  $J = 6.16, 4.28$  Hz, 2H), 8.47 (s, 1H), 7.97 (d,  $J = 4.23$  Hz, 1H), 7.95 (dd,  $J = 7.88, 2.15$  Hz, 1H), 7.51 (dd,  $J = 7.57, 4.79$  Hz, 1H).  $^{13}\text{C}$  NMR (151 MHz, Chloroform-*d*)  $\delta$  152.8, 151.7, 150.4, 147.0, 147.0, 145.8, 137.0, 126.5, 126.3, 112.8, 110.6, 83.5.<sup>[13]</sup>

7-isopropylpyrazolo[1,5-*a*]pyrimidine-3-carbonitrile (**1r**)

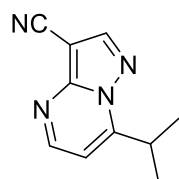

White solid; Yield: 51 %;  $^1\text{H}$  NMR (400 MHz, Chloroform-*d*)  $\delta$  8.65 (d,  $J = 4.31$  Hz, 1H), 8.37 (s, 1H), 6.93 (d,  $J = 4.50$  Hz, 1H), 3.87 (p,  $J = 6.88$  Hz, 1H), 1.43 (d,  $J = 6.91$  Hz, 6H).  $^{13}\text{C}$  NMR (101 MHz, Chloroform-*d*)  $\delta$  157.3, 152.8, 150.6, 146.8, 113.0, 106.4, 83.0, 28.9, 19.9.<sup>[4]</sup>

7-(*tert*-butyl)pyrazolo[1,5-*a*]pyrimidine-3-carbonitrile (**1s**)

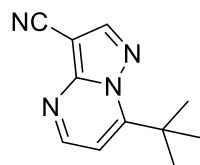

White solid; Yield: 78 %;  $^1\text{H}$  NMR (600 MHz, Chloroform-*d*)  $\delta$  8.63 (d,  $J = 4.71$  Hz, 1H), 8.37 (s, 1H), 6.95 (dd,  $J = 4.48, 1.94$  Hz, 1H), 1.60 (d,  $J = 2.25$  Hz, 9H).  $^{13}\text{C}$  NMR (151 MHz, Chloroform-*d*)  $\delta$  158.6, 152.8, 151.8, 145.7, 113.2, 107.1, 82.6, 36.5, 27.0.

*tert*-butyl 4-(3-cyano-2-(4-phenoxyphenyl)pyrazolo[1,5-*a*]pyrimidin-7-yl)piperidine-1-carboxylate (**1t**)

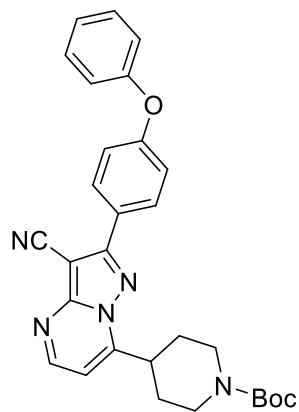

White solid; Yield: 77 %;  $^1\text{H}$  NMR (600 MHz, Chloroform-*d*)  $\delta$  8.63 – 8.54 (m, 1H), 8.16 – 8.08 (m, 2H), 7.35 (dddd,  $J = 8.57, 5.25, 2.61, 1.52$  Hz, 2H), 7.13 (ddt,  $J = 8.58, 7.41, 1.11$  Hz, 1H), 7.10 – 7.01 (m, 4H), 6.85 (t,  $J = 4.02$  Hz, 1H), 4.32 (s, 2H), 3.76 (td,  $J = 12.07, 10.48, 4.43$  Hz, 1H), 2.95 (s, 2H), 2.25 – 2.08 (m, 2H), 1.77 – 1.60 (m, 2H), 1.46 (s, 9H).  $^{13}\text{C}$  NMR (151 MHz, Chloroform-*d*)  $\delta$  159.7, 156.3, 156.2, 154.7, 153.6, 152.4, 152.3, 130.1, 129.3, 129.3, 125.1, 124.3, 119.8, 118.6, 118.6, 114.2, 107.1, 80.0, 79.8, 43.6, 36.8, 29.1, 28.5.<sup>[5]</sup>

### 2,7-diphenylpyrazolo[1,5-*a*]pyrimidine (**3a**)

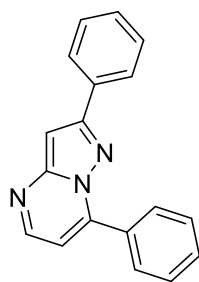

Yellow solid; Yield: 77 %;  $^1\text{H}$  NMR (600 MHz, Chloroform-*d*)  $\delta$  8.48 (d,  $J = 4.29$  Hz, 1H), 8.21 – 8.14 (m, 2H), 8.03 – 7.99 (m, 2H), 7.60 – 7.55 (m, 3H), 7.46 – 7.42 (m, 2H), 7.40 – 7.35 (m, 1H), 7.07 (s, 1H), 6.88 (d,  $J = 4.35$  Hz, 1H).  $^{13}\text{C}$  NMR (151 MHz, Chloroform-*d*)  $\delta$  155.9, 151.3, 149.0, 146.4, 133.0, 131.2, 129.6, 129.1, 128.8, 128.6, 126.8, 107.2, 93.8.<sup>[12]</sup>

### 7-phenyl-2-(*o*-tolyl)pyrazolo[1,5-*a*]pyrimidine (**3b**)

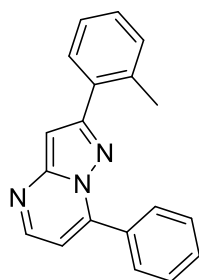

Yellow solid; Yield: 66 %;  $^1\text{H}$  NMR (600 MHz, Chloroform-*d*)  $\delta$  8.52 (d,  $J = 4.59$  Hz, 1H), 8.15 (dd,  $J = 6.46, 3.07$  Hz, 2H), 7.71 (d,  $J = 6.78$  Hz, 1H), 7.55 (t,  $J = 3.51$  Hz, 3H), 7.28 (d,  $J = 7.92$  Hz, 3H), 6.95 (s, 1H), 6.91 (d,  $J = 4.49$  Hz, 1H), 2.58 (s, 3H).  $^{13}\text{C}$  NMR (151 MHz, Chloroform-*d*)  $\delta$  156.8, 150.5, 149.0, 146.4, 136.7, 132.9, 131.2, 131.2, 131.1, 130.2, 129.5, 128.6, 126.0, 107.1, 97.0, 21.6. TOF-HRMS Calcd. for  $\text{C}_{19}\text{H}_{16}\text{N}_3$  [ $\text{M}+\text{H}^+$ ]: 286.1339, found 286.1332.

### 2-(2-methoxyphenyl)-7-phenylpyrazolo[1,5-*a*]pyrimidine (**3c**)

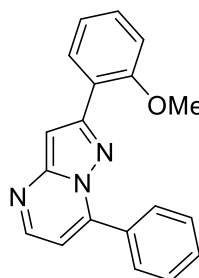

Yellow solid; Yield: 70 %;  $^1\text{H}$  NMR (600 MHz, Chloroform-*d*)  $\delta$  8.48 (d,  $J = 4.71$  Hz, 1H), 8.18 (dd,  $J = 6.55, 3.06$  Hz, 2H), 8.15 (dd,  $J = 7.61, 1.90$  Hz, 1H), 7.56 (q,  $J = 3.78$  Hz, 3H), 7.38 (s, 1H), 7.37 – 7.33 (m, 1H), 7.07 – 6.98 (m, 2H), 6.88 (d,  $J = 4.68$  Hz, 1H), 3.96 (s, 3H).  $^{13}\text{C}$  NMR (151 MHz, Chloroform-*d*)  $\delta$  157.8, 152.9, 150.7, 148.5, 146.0, 131.4, 131.0, 130.1, 129.5, 129.4, 128.6, 121.9, 120.9, 111.6, 107.1, 98.3, 55.7.<sup>[14]</sup>

### 7-phenyl-2-(*m*-tolyl)pyrazolo[1,5-*a*]pyrimidine (**3d**)

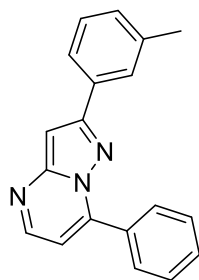

Yellow solid; Yield: 75 %;  $^1\text{H}$  NMR (600 MHz, Chloroform-*d*)  $\delta$  8.48 (d,  $J = 4.29$  Hz, 1H), 8.21 – 8.13 (m, 2H), 7.81 (dd,  $J = 7.98, 1.57$  Hz, 2H), 7.62 – 7.50 (m, 3H), 7.34 (t,  $J = 7.52$  Hz, 1H), 7.22 – 7.16 (m, 1H), 7.06 (s, 1H), 6.87 (dd,  $J = 4.33, 1.05$  Hz, 1H), 2.42 (s, 3H).  $^{13}\text{C}$  NMR (151 MHz, Chloroform-*d*)  $\delta$  156.1, 151.2, 149.0, 146.4, 138.4, 132.9, 131.2, 131.1, 129.9, 129.6, 128.7, 128.7, 127.3, 124.0, 107.2, 93.8, 21.6. TOF-

HRMS Calcd. for C<sub>19</sub>H<sub>16</sub>N<sub>3</sub> [M+H<sup>+</sup>]: 286.1339, found 286.1332.

7-phenyl-2-(*p*-tolyl)pyrazolo[1,5-*a*]pyrimidine (**3e**)

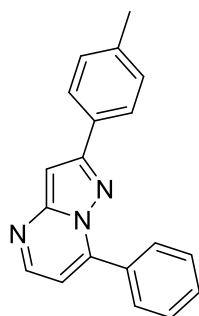

Yellow solid; Yield: 68 %; <sup>1</sup>H NMR (600 MHz, Chloroform-*d*) δ 8.48 (d, *J* = 4.30 Hz, 1H), 8.24 – 8.11 (m, 2H), 7.92 – 7.87 (m, 2H), 7.61 – 7.53 (m, 3H), 7.25 (s, 1H), 7.24 (s, 1H), 7.03 (s, 1H), 6.87 (d, *J* = 4.00 Hz, 1H), 2.39 (s, 3H). <sup>13</sup>C NMR (151 MHz, Chloroform-*d*) δ 156.1, 151.3, 148.9, 146.4, 139.0, 131.2, 131.1, 130.2, 129.6, 129.5, 128.6, 126.6, 107.1, 93.5, 21.5. TOF-HRMS Calcd. for C<sub>19</sub>H<sub>16</sub>N<sub>3</sub>

[M+H<sup>+</sup>]: 286.1339, found 286.1332.

2-(4-methoxyphenyl)-7-phenylpyrazolo[1,5-*a*]pyrimidine (**3f**)

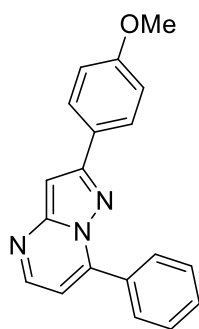

Yellow solid; Yield: 62 %; <sup>1</sup>H NMR (400 MHz, Chloroform-*d*) δ 8.46 (dd, *J* = 4.45, 0.61 Hz, 1H), 8.22 – 8.13 (m, 2H), 7.99 – 7.87 (m, 2H), 7.61 – 7.53 (m, 3H), 6.98 (d, *J* = 1.70 Hz, 2H), 6.96 (d, *J* = 2.02 Hz, 1H), 6.86 (dd, *J* = 4.33, 0.68 Hz, 1H), 3.85 (s, 3H). <sup>13</sup>C NMR (101 MHz, Chloroform-*d*) δ 160.4, 155.9, 151.3, 148.9, 146.3, 131.2, 131.1, 129.6, 128.6, 128.1, 125.7, 114.2, 107.0, 93.0, 55.4.<sup>[14]</sup>

2-(2-chlorophenyl)-7-phenylpyrazolo[1,5-*a*]pyrimidine (**3g**)

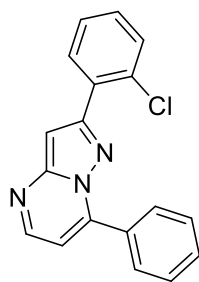

Yellow solid; Yield: 71 %; <sup>1</sup>H NMR (600 MHz, Chloroform-*d*) δ 8.52 (d, *J* = 4.33 Hz, 1H), 8.18 – 8.12 (m, 2H), 7.94 – 7.89 (m, 1H), 7.55 (tt, *J* = 4.01, 2.34 Hz, 3H), 7.50 – 7.46 (m, 1H), 7.35 – 7.28 (m, 3H), 6.91 (d, *J* = 4.32 Hz, 1H). <sup>13</sup>C NMR (151 MHz, Chloroform-*d*) δ 153.7, 150.4, 149.1, 146.4, 133.1, 132.2, 131.5, 131.2, 131.1, 130.6,

129.7, 129.5, 128.7, 127.0, 107.5, 98.3. TOF-HRMS Calcd. for C<sub>18</sub>H<sub>13</sub>ClN<sub>3</sub> [M+H<sup>+</sup>]: 306.0793, found 306.0797.

2-(3-fluorophenyl)-7-phenylpyrazolo[1,5-*a*]pyrimidine (**3h**)

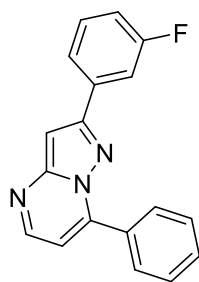

Yellow solid; Yield: 66 %; <sup>1</sup>H NMR (600 MHz, Chloroform-*d*) δ 8.49 (d, *J* = 4.20 Hz, 1H), 8.14 (dd, *J* = 6.33, 3.30 Hz, 2H), 7.76 (d, *J* = 7.86 Hz, 1H), 7.74 – 7.69 (m, 1H), 7.60 – 7.55 (m, 3H), 7.44 – 7.36 (m, 1H), 7.09 – 7.05 (m, 1H), 7.04 (s, 1H), 6.90 (d, *J* = 4.42 Hz, 1H). <sup>13</sup>C NMR (151 MHz, Chloroform-*d*) δ 164.0, 162.4, 154.6, 151.2,

149.2, 146.5, 135.2 (d,  $J = 8.5$  Hz), 131.2, 130.9, 130.3 (d,  $J = 8.5$  Hz), 129.5, 128.7, 122.4, 115.8 (d,  $J = 21.7$  Hz), 113.4 (d,  $J = 22.0$  Hz), 107.5, 94.0. TOF-HRMS Calcd. for  $C_{18}H_{13}FN_3$  [ $M+H^+$ ]: 290.1088, found 290.1092.

2-(4-fluorophenyl)-7-phenylpyrazolo[1,5-*a*]pyrimidine (**3i**)

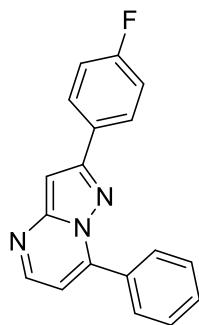

Yellow solid; Yield: 63 %;  $^1H$  NMR (600 MHz, Chloroform-*d*)  $\delta$  8.49 (d,  $J = 4.31$  Hz, 1H), 8.19 – 8.11 (m, 2H), 8.01 – 7.95 (m, 2H), 7.63 – 7.55 (m, 3H), 7.16 – 7.09 (m, 2H), 7.00 (s, 1H), 6.89 (d,  $J = 4.28$  Hz, 1H).  $^{13}C$  NMR (151 MHz, Chloroform-*d*)  $\delta$  164.2, 162.6, 155.0, 151.3, 149.1, 146.4, 131.2, 131.0, 129.5, 129.2, 128.6, 128.5 (d,  $J = 8.1$  Hz), 115.7 (d,  $J = 21.6$  Hz), 107.3, 93.5. TOF-HRMS Calcd. for

$C_{18}H_{13}FN_3$  [ $M+H^+$ ]: 290.1088, found 290.1092.

2-(4-chlorophenyl)-7-phenylpyrazolo[1,5-*a*]pyrimidine (**3j**)

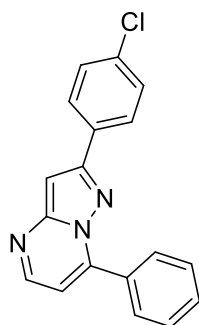

Yellow solid; Yield: 71 %;  $^1H$  NMR (600 MHz, Chloroform-*d*)  $\delta$  8.51 – 8.46 (m, 1H), 8.20 – 8.10 (m, 2H), 7.92 (dd,  $J = 8.75, 2.12$  Hz, 2H), 7.62 – 7.55 (m, 3H), 7.40 (dd,  $J = 8.69, 2.02$  Hz, 2H), 7.04 – 7.00 (m, 1H), 6.92 – 6.87 (m, 1H).  $^{13}C$  NMR (151 MHz, Chloroform-*d*)  $\delta$  154.8, 151.3, 149.2, 146.5, 134.9, 131.5, 131.2, 131.0, 129.5, 129.0, 128.7, 128.0, 107.5, 93.7. TOF-HRMS Calcd. for  $C_{18}H_{13}ClN_3$  [ $M+H^+$ ]:

306.0793, found 306.0797.

2-(4-bromophenyl)-7-phenylpyrazolo[1,5-*a*]pyrimidine (**3k**)

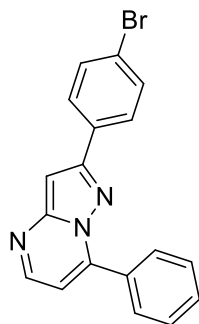

White solid; Yield: 51 %;  $^1H$  NMR (400 MHz, Chloroform-*d*)  $\delta$  8.50 (dd,  $J = 4.35, 0.69$  Hz, 1H), 8.20 – 8.08 (m, 2H), 7.92 – 7.82 (m, 2H), 7.65 – 7.56 (m, 4H), 7.55 (d,  $J = 1.72$  Hz, 1H), 7.03 (d,  $J = 0.66$  Hz, 1H), 6.90 (dd,  $J = 4.40, 0.68$  Hz, 1H).  $^{13}C$  NMR (101 MHz, Chloroform-*d*)  $\delta$  154.8, 151.3, 149.3, 146.5, 132.0, 131.3, 131.0, 129.5, 128.7, 128.2, 123.2, 107.5, 93.8. TOF-HRMS Calcd. for

$C_{18}H_{13}BrN_3$  [ $M+H^+$ ]: 350.0287, found 350.0291.

7-phenyl-2-(4-(trifluoromethyl)phenyl)pyrazolo[1,5-*a*]pyrimidine (**3l**)

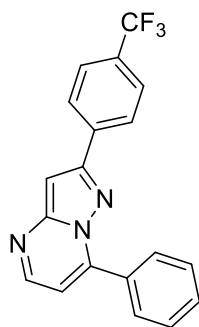

White solid; Yield: 63 %;  $^1\text{H}$  NMR (600 MHz, Chloroform-*d*)  $\delta$  8.51 (dd,  $J = 4.35, 1.56$  Hz, 1H), 8.18 – 8.12 (m, 2H), 8.09 (d,  $J = 8.03$  Hz, 2H), 7.68 (d,  $J = 8.12$  Hz, 2H), 7.62 – 7.55 (m, 3H), 7.09 (d,  $J = 1.07$  Hz, 1H), 6.91 (dd,  $J = 4.34, 1.84$  Hz, 1H).  $^{13}\text{C}$  NMR (151 MHz, Chloroform-*d*)  $\delta$  154.2, 151.3, 149.3, 146.5, 136.4, 131.3, 130.9, 130.7 (d,  $J = 32.4$  Hz), 129.5, 129.1, 128.7, 127.0 (d,  $J = 86.0$  Hz), 126.9, 125.7 (q,  $J = 3.5$  Hz), 124.2 (d,  $J = 272.1$  Hz), 107.7, 94.3. TOF-HRMS Calcd. for  $\text{C}_{19}\text{H}_{13}\text{F}_3\text{N}_3$  [ $\text{M}+\text{H}^+$ ]: 340.1056, found 340.1058.

2-(naphthalen-2-yl)-7-phenylpyrazolo[1,5-*a*]pyrimidine (**3m**)

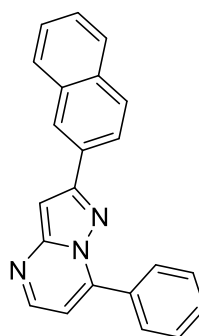

White solid; Yield: 72 %;  $^1\text{H}$  NMR (400 MHz, Chloroform-*d*)  $\delta$  8.50 (d,  $J = 4.34$  Hz, 1H), 8.46 (d,  $J = 1.75$  Hz, 1H), 8.25 – 8.18 (m, 2H), 8.15 (dd,  $J = 8.53, 1.75$  Hz, 1H), 7.98 – 7.88 (m, 2H), 7.88 – 7.79 (m, 1H), 7.65 – 7.57 (m, 3H), 7.54 – 7.45 (m, 2H), 7.20 (s, 1H), 6.90 (d,  $J = 4.33$  Hz, 1H).  $^{13}\text{C}$  NMR (151 MHz, Chloroform-*d*)  $\delta$  155.9, 151.4, 149.1, 146.5, 133.8, 133.6, 131.2, 131.2, 130.4, 129.6, 128.7, 128.6, 128.5, 127.9, 126.5, 126.4, 125.9, 124.5, 107.4, 94.1. TOF-HRMS Calcd. for  $\text{C}_{22}\text{H}_{16}\text{N}_3$  [ $\text{M}+\text{H}^+$ ]: 322.1339, found 322.1341.

7-phenyl-2-(thiophen-2-yl)pyrazolo[1,5-*a*]pyrimidine (**3n**)

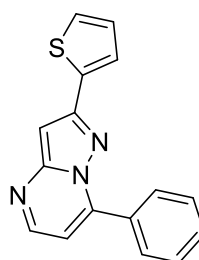

Yellow solid; Yield: 75 %;  $^1\text{H}$  NMR (600 MHz, Chloroform-*d*)  $\delta$  8.47 (d,  $J = 4.32$  Hz, 1H), 8.19 – 8.11 (m, 2H), 7.57 (td,  $J = 4.23, 3.76, 2.30$  Hz, 4H), 7.34 (dd,  $J = 5.06, 1.13$  Hz, 1H), 7.10 (dd,  $J = 5.02, 3.58$  Hz, 1H), 6.94 (s, 1H), 6.88 (d,  $J = 4.34$  Hz, 1H).  $^{13}\text{C}$  NMR (151 MHz, Chloroform-*d*)  $\delta$  151.3, 151.1, 149.3, 146.3, 136.3, 131.2, 131.0, 129.6, 128.7, 127.9, 126.5, 126.0, 107.3, 93.5. TOF-HRMS Calcd. for  $\text{C}_{16}\text{H}_{12}\text{N}_3\text{S}$  [ $\text{M}+\text{H}^+$ ]: 278.0746, found 278.0748.



2-(furan-2-yl)-7-phenylpyrazolo[1,5-a]pyrimidine (**3o**)

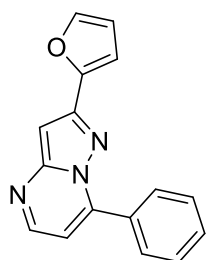

Yellow solid; Yield: 71 %;  $^1\text{H}$  NMR (600 MHz, Chloroform-*d*)  $\delta$  8.48 (d,  $J = 4.82$  Hz, 1H), 8.12 (dd,  $J = 6.47, 3.01$  Hz, 2H), 7.56 (t,  $J = 3.18$  Hz, 3H), 7.53 (d,  $J = 1.81$  Hz, 1H), 6.98 (s, 1H), 6.92 (d,  $J = 3.40$  Hz, 1H), 6.88 (d,  $J = 2.90$  Hz, 1H), 6.52 – 6.46 (m, 1H).  $^{13}\text{C}$  NMR (151 MHz, Chloroform-*d*)  $\delta$  150.9, 149.3, 148.6, 148.2, 146.5, 143.2, 131.2, 131.0, 129.5, 128.7, 111.7, 108.5, 107.5, 93.5. TOF-HRMS Calcd. for  $\text{C}_{16}\text{H}_{12}\text{N}_3\text{O}$   $[\text{M}+\text{H}^+]$ : 262.0975, found 262.0980.

7-phenylpyrazolo[1,5-a]pyrimidine (**3p**)

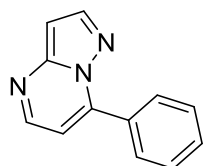

White solid; Yield: 63 %;  $^1\text{H}$  NMR (600 MHz, Chloroform-*d*)  $\delta$  8.52 (t,  $J = 4.63$  Hz, 1H), 8.21 – 8.10 (m, 1H), 8.02 (p,  $J = 3.40, 2.87$  Hz, 2H), 7.55 (dt,  $J = 7.27, 4.37$  Hz, 3H), 6.88 (t,  $J = 4.95$  Hz, 1H), 6.80 – 6.73 (m, 1H).  $^{13}\text{C}$  NMR (151 MHz, Chloroform-*d*)  $\delta$  150.0, 149.1, 146.9, 144.8, 131.2, 131.1, 129.3, 128.8, 107.4, 97.2.<sup>[15]</sup>

2-(*tert*-butyl)-7-phenylpyrazolo[1,5-a]pyrimidine (**3q**)

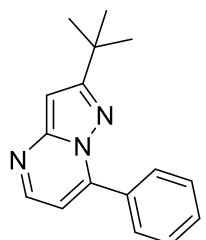

Yellow solid; Yield: 78 %;  $^1\text{H}$  NMR (600 MHz, Chloroform-*d*)  $\delta$  8.42 (d,  $J = 4.44$  Hz, 1H), 8.18 (q,  $J = 3.70, 3.10$  Hz, 2H), 7.54 (dd,  $J = 5.19, 2.55$  Hz, 3H), 6.83 (dd,  $J = 4.62, 1.79$  Hz, 1H), 6.60 (s, 1H), 1.41 (s, 9H).  $^{13}\text{C}$  NMR (151 MHz, Chloroform-*d*)  $\delta$  167.7, 150.6, 148.4, 146.0, 131.4, 131.0, 129.6, 128.5, 106.3, 93.0, 33.1, 30.6.<sup>[8]</sup>

7-phenyl-4,5-dihydropyrazolo[1,5-a]pyrimidine-3-carbonitrile (**5a**)

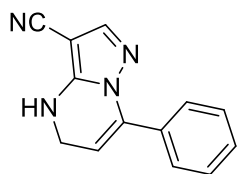

White solid; Yield: 75 %;  $^1\text{H}$  NMR (600 MHz, Chloroform-*d*)  $\delta$  7.48 (dt,  $J = 7.44, 3.56$  Hz, 2H), 7.44 (s, 1H), 7.42 – 7.38 (m, 3H), 5.29 (s, 1H), 5.20 (t,  $J = 4.29$  Hz, 1H), 4.27 – 4.20 (m, 2H).  $^{13}\text{C}$  NMR (151 MHz, Chloroform-*d*)  $\delta$  150.0, 140.5, 137.6, 132.2, 129.4, 128.9, 128.3, 114.4, 104.3, 73.1, 40.8.<sup>[16]</sup>

7-(2-methoxyphenyl)-4,5-dihydropyrazolo[1,5-*a*]pyrimidine-3-carbonitrile (**5b**)

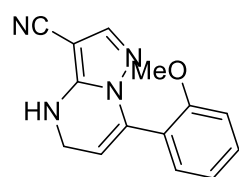

White solid; Yield: 80 %;  $^1\text{H}$  NMR (600 MHz, Chloroform-*d*)  $\delta$  7.39 (dddd,  $J = 8.33, 7.45, 1.82, 0.86$  Hz, 1H), 7.34 (d,  $J = 0.89$  Hz, 1H), 7.29 – 7.23 (m, 1H), 6.98 (tt,  $J = 7.49, 1.01$  Hz, 1H), 6.94 (dd,  $J = 8.33, 1.09$  Hz, 1H), 5.13 (dt,  $J = 4.16, 2.49$  Hz, 2H), 4.26 (td,  $J = 3.68, 1.76$  Hz, 2H), 3.76 (d,  $J = 0.89$  Hz, 3H).  $^{13}\text{C}$  NMR (151 MHz, Chloroform-*d*)  $\delta$  157.7, 149.4, 140.4, 135.0, 131.2, 131.1, 121.8, 120.6, 114.5, 111.3, 104.8, 72.7, 55.8, 41.1. TOF-HRMS Calcd. for  $\text{C}_{14}\text{H}_{13}\text{N}_4\text{O}$  [ $\text{M}+\text{H}^+$ ]: 253.1084, found 253.1077.

7-(*m*-tolyl)-4,5-dihydropyrazolo[1,5-*a*]pyrimidine-3-carbonitrile (**5c**)

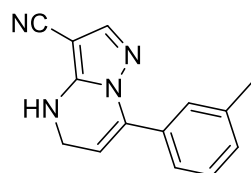

White solid; Yield: 85 %;  $^1\text{H}$  NMR (600 MHz, Chloroform-*d*)  $\delta$  7.37 (s, 1H), 7.33 (td,  $J = 7.44, 1.59$  Hz, 1H), 7.27 (dd,  $J = 7.47, 1.61$  Hz, 1H), 7.25 – 7.21 (m, 2H), 5.51 – 5.20 (m, 1H), 5.07 (d,  $J = 3.63$  Hz, 1H), 4.37 – 4.17 (m, 2H), 2.19 (s, 3H).  $^{13}\text{C}$  NMR (151 MHz, Chloroform-*d*)  $\delta$  149.5, 141.0, 137.5, 137.2, 132.4, 130.2, 130.0, 129.8, 125.9, 114.4, 104.4, 72.8, 41.0, 19.8. TOF-HRMS Calcd. for  $\text{C}_{14}\text{H}_{13}\text{N}_4$  [ $\text{M}+\text{H}^+$ ]: 237.1135, found 237.1140.

7-(3-methoxyphenyl)-4,5-dihydropyrazolo[1,5-*a*]pyrimidine-3-carbonitrile (**5d**)

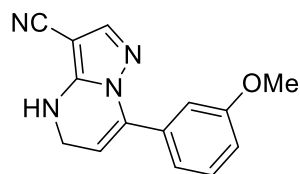

White solid; Yield: 78 %;  $^1\text{H}$  NMR (600 MHz, Chloroform-*d*)  $\delta$  7.44 (s, 1H), 7.31 (t,  $J = 7.94$  Hz, 1H), 7.09 – 7.04 (m, 1H), 7.02 (t,  $J = 2.02$  Hz, 1H), 6.94 (dd,  $J = 8.26, 2.61$  Hz, 1H), 5.22 (t,  $J = 2.10$  Hz, 1H), 5.16 (s, 1H), 4.24 (dd,  $J = 3.93, 1.60$  Hz, 2H), 3.80 (s, 3H).  $^{13}\text{C}$  NMR (151 MHz, Chloroform-*d*)  $\delta$  159.4, 150.0, 140.6, 137.4, 133.4, 129.4, 121.3, 115.0, 114.7, 114.2, 104.3, 73.2, 55.4, 40.9. TOF-HRMS Calcd. for  $\text{C}_{14}\text{H}_{13}\text{N}_4\text{O}$  [ $\text{M}+\text{H}^+$ ]: 253.1084, found 253.1077.

7-(*p*-tolyl)-4,5-dihydropyrazolo[1,5-*a*]pyrimidine-3-carbonitrile (**5e**)

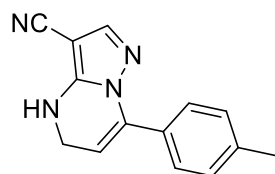

White solid; Yield: 82 %;  $^1\text{H}$  NMR (600 MHz, Chloroform-*d*)  $\delta$  7.43 (s, 1H), 7.40 – 7.33 (m, 2H), 7.20 (d,  $J = 7.86$  Hz, 2H), 5.29 (s, 1H), 5.17 (tt,  $J = 3.92, 1.85$  Hz, 1H), 4.22 (tt,  $J = 3.94, 2.00$  Hz, 2H), 2.36 (s, 3H).  $^{13}\text{C}$  NMR (151 MHz, Chloroform-

*d*)  $\delta$  150.0, 140.5, 139.5, 137.5, 129.3, 129.0, 128.8, 114.4, 103.7, 73.0, 40.8, 21.4.  
TOF-HRMS Calcd. for C<sub>14</sub>H<sub>13</sub>N<sub>4</sub> [M+H<sup>+</sup>]: 237.1135, found 237.1140.

7-(4-(*tert*-butyl)phenyl)-4,5-dihydropyrazolo[1,5-*a*]pyrimidine-3-carbonitrile (**5f**)

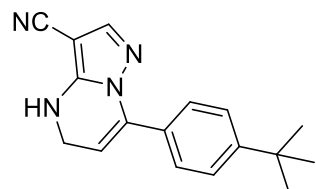

White solid; Yield: 75 %; <sup>1</sup>H NMR (600 MHz, Chloroform-*d*)  $\delta$  7.45 (s, 1H), 7.42 (s, 4H), 5.19 (td, *J* = 4.01, 1.40 Hz, 1H), 5.15 (s, 1H), 4.24 (dd, *J* = 3.98, 1.25 Hz, 2H), 1.31 (s, 9H). <sup>13</sup>C NMR (151 MHz, Chloroform-*d*)  $\delta$  152.5, 150.0,

140.5, 137.5, 129.2, 128.5, 125.3, 114.3, 103.8, 73.2, 40.9, 34.8, 31.3. TOF-HRMS Calcd. for C<sub>17</sub>H<sub>19</sub>N<sub>4</sub> [M+H<sup>+</sup>]: 279.1604, found 279.1606.

7-(3-chlorophenyl)-4,5-dihydropyrazolo[1,5-*a*]pyrimidine-3-carbonitrile (**5g**)

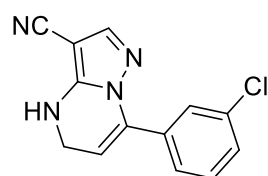

White solid; Yield: 85 %; <sup>1</sup>H NMR (400 MHz, Chloroform-*d*)  $\delta$  7.49 (d, *J* = 1.95 Hz, 1H), 7.45 (s, 1H), 7.38 (ddt, *J* = 5.87, 3.74, 1.87 Hz, 2H), 7.35 – 7.30 (m, 1H), 5.25 (td, *J* = 4.05, 1.80 Hz, 1H), 5.10 (s, 1H), 4.28 (dd, *J* = 4.09, 1.64 Hz, 2H). <sup>13</sup>C NMR

(151 MHz, Chloroform-*d*)  $\delta$  149.9, 140.7, 136.4, 134.3, 133.7, 129.6, 129.0, 127.1, 114.1, 105.0, 73.4, 40.9. TOF-HRMS Calcd. for C<sub>13</sub>H<sub>10</sub>ClN<sub>4</sub> [M+H<sup>+</sup>]: 257.0589, found 257.0586.

7-(3-fluorophenyl)-4,5-dihydropyrazolo[1,5-*a*]pyrimidine-3-carbonitrile (**5h**)

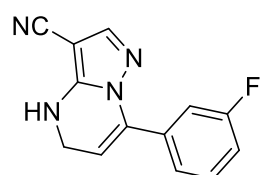

White solid; Yield: 80 %; <sup>1</sup>H NMR (600 MHz, Chloroform-*d*)  $\delta$  7.45 (s, 1H), 7.36 (td, *J* = 8.00, 5.76 Hz, 1H), 7.31 – 7.26 (m, 1H), 7.22 (dt, *J* = 9.69, 2.12 Hz, 1H), 7.10 (td, *J* = 8.42, 2.64 Hz, 1H), 5.26 (td, *J* = 3.98, 1.70 Hz, 1H), 5.08 (s, 1H), 4.28 (dd, *J* = 4.08,

1.54 Hz, 2H). <sup>13</sup>C NMR (151 MHz, Chloroform-*d*)  $\delta$  163.2, 161.6, 149.8, 140.6, 136.5, 134.0 (d, *J* = 8.29 Hz), 129.9 (d, *J* = 8.3 Hz), 124.6 (d, *J* = 3.1 Hz), 116.2 (dd, *J* = 48.2, 22.0 Hz), 114.0, 104.9, 73.4, 40.8. TOF-HRMS Calcd. for C<sub>13</sub>H<sub>10</sub>FN<sub>4</sub> [M+H<sup>+</sup>]: 241.0884, found 241.0886.

7-(4-fluorophenyl)-4,5-dihydropyrazolo[1,5-*a*]pyrimidine-3-carbonitrile (**5i**)

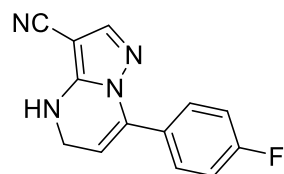

White solid; Yield: 75 %; <sup>1</sup>H NMR (600 MHz, Chloroform-*d*) δ 7.45 (s, 1H), 7.36 (td, *J* = 8.00, 5.76 Hz, 1H), 7.31 – 7.26 (m, 1H), 7.22 (dt, *J* = 9.69, 2.12 Hz, 1H), 7.10 (td, *J* = 8.42, 2.64 Hz, 1H), 5.26 (td, *J* = 3.98, 1.70 Hz, 1H), 5.08 (s, 1H), 4.28 (dd, *J* = 4.08, 1.54 Hz, 2H). <sup>13</sup>C NMR (151 MHz, Chloroform-*d*) δ 163.2, 161.6, 149.8, 140.6, 136.5, 134.0 (d, *J* = 8.2 Hz), 129.9 (d, *J* = 8.3 Hz), 124.6 (d, *J* = 3.1 Hz), 116.2 (dd, *J* = 48.2, 22.0 Hz), 114.0, 104.9, 73.5, 40.8. TOF-HRMS Calcd. for C<sub>13</sub>H<sub>10</sub>FN<sub>4</sub> [M+H<sup>+</sup>]: 241.0884, found 241.0886.

7-(4-bromophenyl)-4,5-dihydropyrazolo[1,5-*a*]pyrimidine-3-carbonitrile (**5j**)

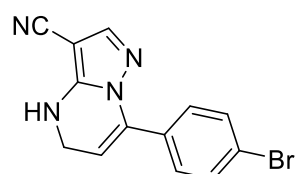

White solid; Yield: 78 %; <sup>1</sup>H NMR (600 MHz, Chloroform-*d*) δ 7.53 (d, *J* = 8.04 Hz, 2H), 7.44 (s, 1H), 7.37 (d, *J* = 8.20 Hz, 2H), 5.23 (s, 1H), 4.99 (s, 1H), 4.27 (d, *J* = 3.43 Hz, 2H). <sup>13</sup>C NMR (151 MHz, Chloroform-*d*) δ 149.7, 140.6, 136.7, 131.6, 130.9, 130.5, 123.9, 113.9, 104.5, 73.6, 40.9. TOF-HRMS Calcd. for C<sub>13</sub>H<sub>10</sub>BrN<sub>4</sub> [M+H<sup>+</sup>]: 301.0083, found 301.0085.

7-(pyridin-2-yl)-4,5-dihydropyrazolo[1,5-*a*]pyrimidine-3-carbonitrile (**5k**)

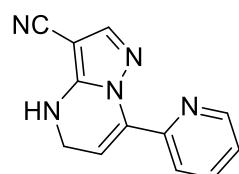

White solid; Yield: 80 %; <sup>1</sup>H NMR (600 MHz, Chloroform-*d*) δ 8.63 (d, *J* = 4.95 Hz, 1H), 7.79 (d, *J* = 8.02 Hz, 1H), 7.74 (t, *J* = 7.91 Hz, 1H), 7.48 (s, 1H), 7.30 (dd, *J* = 7.49, 4.89 Hz, 1H), 5.79 (t, *J* = 4.11 Hz, 1H), 5.19 (s, 1H), 4.31 (d, *J* = 4.12 Hz, 2H). <sup>13</sup>C NMR (151 MHz, Chloroform-*d*) δ 150.1, 149.8, 149.6, 140.7, 136.4, 136.4, 124.3, 124.0, 114.1, 107.4, 73.3, 41.0. TOF-HRMS Calcd. for C<sub>12</sub>H<sub>10</sub>N<sub>5</sub> [M+H<sup>+</sup>]: 224.0931, found 224.0936.

2,7-diphenyl-4,5-dihydropyrazolo[1,5-*a*]pyrimidine-3-carbonitrile (**5l**)

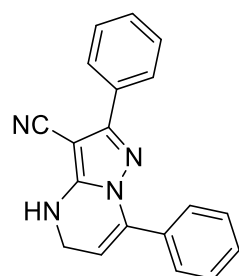

White solid; Yield: 84 %; <sup>1</sup>H NMR (600 MHz, Chloroform-*d*) δ 7.91 – 7.85 (m, 2H), 7.60 – 7.56 (m, 2H), 7.43 – 7.39 (m, 3H), 7.39 – 7.32 (m, 3H), 5.26 (td, *J* = 4.04, 1.77 Hz, 1H), 4.99 (s, 1H), 4.29 (dd, *J* = 4.09, 1.49 Hz, 2H). <sup>13</sup>C NMR (151 MHz, Chloroform-*d*) δ 151.6, 150.3, 137.6, 132.1, 131.2, 129.3, 129.3, 129.0, 128.7,

128.2, 126.6, 115.3, 104.2, 71.3, 40.8. TOF-HRMS Calcd. for C<sub>19</sub>H<sub>15</sub>N<sub>4</sub> [M+H<sup>+</sup>]: 299.1291, found 299.1289.

#### 7-phenyl-4,5-dihydropyrazolo[1,5-*a*]pyrimidine (**5m**)

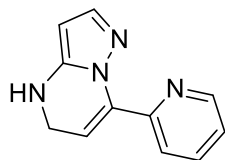

White solid; Yield: 80 %; <sup>1</sup>H NMR (600 MHz, Chloroform-*d*) δ 7.59 – 7.49 (m, 2H), 7.42 – 7.35 (m, 3H), 7.31 (d, *J* = 1.98 Hz, 1H), 5.44 (d, *J* = 2.01 Hz, 1H), 5.26 (t, *J* = 4.16 Hz, 1H), 4.04 (d, *J* = 4.28 Hz, 3H). <sup>13</sup>C NMR (151 MHz, Chloroform-*d*) δ 145.6, 139.9, 138.6, 133.5, 128.9, 128.2, 104.0, 87.7, 41.0. TOF-HRMS Calcd. for C<sub>12</sub>H<sub>12</sub>N<sub>3</sub> [M+H<sup>+</sup>]: 198.1026, found 198.1027.

### 7. NMR, SFC and HPLC, optical rotation and HRMS Data of compounds **2**, **4** and **6**

#### 7-phenyl-4,5,6,7-tetrahydropyrazolo[1,5-*a*]pyrimidine-3-carbonitrile (**2a**)

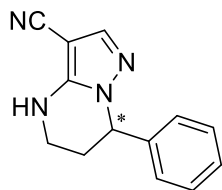

White solid; (PE/EA = 3/1); Yield: 94%; 92% ee; [α]<sub>D</sub><sup>25</sup> = -42.0 (*c* = 1.0, CH<sub>2</sub>Cl<sub>2</sub>); SFC condition: Lux 5u Amylose-1 (250 × 4.60 mm), MeOH:CO<sub>2</sub> = 20:80, 3.0 mL/min, 210 nm; *t*<sub>R</sub> = 8.7 min (major), *t*<sub>R</sub> = 6.3 min (minor); <sup>1</sup>H NMR (600 MHz, Chloroform-*d*) δ 7.49 (d, *J* = 4.96 Hz, 1H), 7.33 (t, *J* = 7.37 Hz, 2H), 7.28 (dtd, *J* = 7.36, 5.18, 2.69 Hz, 1H), 7.04 – 6.92 (m, 2H), 5.55 (s, 1H), 5.45 (t, *J* = 4.71 Hz, 1H), 3.28 (dq, *J* = 12.08, 4.09 Hz, 1H), 3.18 (dddd, *J* = 12.08, 10.57, 3.28, 1.35 Hz, 1H), 2.57 – 2.33 (m, 1H), 2.17 (dq, *J* = 13.07, 4.15 Hz, 1H). <sup>13</sup>C NMR (151 MHz, Chloroform-*d*) δ 150.3, 141.0, 140.4, 128.9, 128.1, 128.0, 126.0, 126.0, 115.0, 71.7, 58.5, 35.7, 29.9, 29.8; TOF-HRMS Calcd. for C<sub>13</sub>H<sub>13</sub>N<sub>4</sub> [M+H<sup>+</sup>]: 225.1135, found 225.1139.

#### 7-(*m*-tolyl)-4,5,6,7-tetrahydropyrazolo[1,5-*a*]pyrimidine-3-carbonitrile (**2b**)

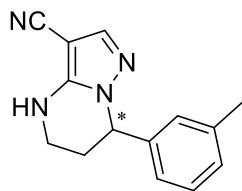

White solid; (PE/EA = 3/1); Yield: 92%; 93% ee; [α]<sub>D</sub><sup>25</sup> = -40.0 (*c* = 1.0, CH<sub>2</sub>Cl<sub>2</sub>); SFC condition: Lux 5u Amylose-1 (250 × 4.60 mm), MeOH:CO<sub>2</sub>=20:80, 3.0 mL/min, 210 nm; *t*<sub>R</sub> = 5.1 min (major), *t*<sub>R</sub> = 4.7 min (minor); <sup>1</sup>H NMR (600 MHz, Chloroform-*d*) δ 7.49 (d, *J* = 0.99 Hz, 1H), 7.22 (td, *J* = 7.41, 1.04 Hz, 1H), 7.14 – 7.03 (m, 1H), 6.83

– 6.73 (m, 2H), 5.41 (t,  $J = 4.77$  Hz, 1H), 5.05 (s, 1H), 3.34 (dq,  $J = 12.12, 4.11$  Hz, 1H), 3.27 (tdd,  $J = 11.92, 3.25, 1.36$  Hz, 1H), 2.45 (dddd,  $J = 14.24, 9.98, 5.43, 4.15$  Hz, 1H), 2.32 (s, 3H), 2.20 (dq,  $J = 13.20, 4.13$  Hz, 1H).  $^{13}\text{C}$  NMR (151 MHz, Chloroform-*d*)  $\delta$  150.1, 140.9, 140.3, 138.7, 128.9, 128.9, 126.7, 123.1, 114.8, 72.0, 58.6, 36.1, 30.0, 21.6. TOF-HRMS Calcd. for  $\text{C}_{14}\text{H}_{15}\text{N}_4$  [ $\text{M}+\text{H}^+$ ]: 239.1291, found 239.1295.

7-(3-methoxyphenyl)-4,5,6,7-tetrahydropyrazolo[1,5-*a*]pyrimidine-3-carbonitrile (**2c**)

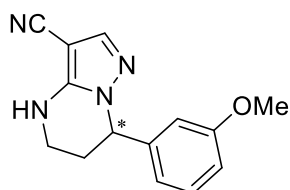

White solid; (PE/EA = 3/1); Yield: 93%; 92% ee;  $[\alpha]_{\text{D}}^{25} = -27.5$  ( $c = 1.0, \text{CH}_2\text{Cl}_2$ ); SFC condition: Lux 5u Amylose-1 (250  $\times$  4.60 mm), MeOH:CO<sub>2</sub>=30:70, 3.0 mL/min, 254 nm;  $t_{\text{R}} = 4.6$  min (major),  $t_{\text{R}} = 3.4$  min (minor);  $^1\text{H}$  NMR (400 MHz, Chloroform-*d*)  $\delta$  7.48 (s, 1H), 7.31 – 7.19 (m, 1H), 6.81 (ddd,  $J = 8.35, 2.57, 0.97$  Hz, 1H), 6.61 – 6.53 (m, 1H), 6.50 (t,  $J = 2.18$  Hz, 1H), 5.42 (t,  $J = 4.59$  Hz, 1H), 5.38 (s, 1H), 3.76 (s, 3H), 3.37 – 3.12 (m, 2H), 2.52 – 2.34 (m, 1H), 2.32 – 2.09 (m, 1H).  $^{13}\text{C}$  NMR (101 MHz, Chloroform-*d*)  $\delta$  160.0, 150.1, 142.0, 140.9, 130.0, 118.2, 114.9, 112.9, 112.3, 71.7, 58.4, 55.3, 35.8, 29.7. TOF-HRMS Calcd. for  $\text{C}_{14}\text{H}_{15}\text{N}_4\text{O}$  [ $\text{M}+\text{H}^+$ ]: 255.1240, found 255.1240.

7-(4-(*tert*-butyl)phenyl)-4,5,6,7-tetrahydropyrazolo[1,5-*a*]pyrimidine-3-carbonitrile

(**2d**)

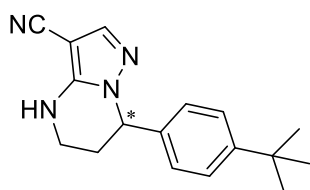

White solid; (PE/EA = 3/1); Yield: 96%; 89% ee;  $[\alpha]_{\text{D}}^{25} = -63.0$  ( $c = 1.0, \text{CH}_2\text{Cl}_2$ ); SFC condition: Lux 5u Amylose-1 (250  $\times$  4.60 mm), MeOH:CO<sub>2</sub> =30:70, 3.0 mL/min, 210 nm;  $t_{\text{R}} = 6.1$  min (major),  $t_{\text{R}} = 3.0$  min (minor);  $^1\text{H}$  NMR (600 MHz, Chloroform-*d*)  $\delta$  7.49 (s, 1H), 7.35 (d,  $J = 8.38$  Hz, 2H), 6.96 – 6.86 (m, 2H), 5.42 (t,  $J = 4.74$  Hz, 1H), 5.16 (s, 1H), 3.41 – 3.07 (m, 2H), 2.44 (dddd,  $J = 14.08, 9.87, 5.36, 4.20$  Hz, 1H), 2.31 – 2.08 (m, 1H), 1.28 (s, 9H).  $^{13}\text{C}$  NMR (151 MHz, Chloroform-*d*)  $\delta$  151.0, 150.1, 140.8, 137.2, 125.8, 125.6, 114.8, 71.9, 58.4, 36.0, 34.6, 31.3, 29.9. TOF-HRMS Calcd. for  $\text{C}_{17}\text{H}_{21}\text{N}_4$  [ $\text{M}+\text{H}^+$ ]: 281.1761, found 281.1763.

7-(3-chlorophenyl)-4,5,6,7-tetrahydropyrazolo[1,5-*a*]pyrimidine-3-carbonitrile (**2e**)

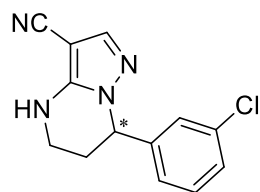

White solid; (PE/EA = 3/1); Yield: 97%; 94% ee;  $[\alpha]_{\text{D}}^{25} = -59.8$  (c = 1.0, CH<sub>2</sub>Cl<sub>2</sub>); SFC condition: Lux 5u Amylose-1 (250 × 4.60 mm), MeOH:CO<sub>2</sub>=20:80, 3.0 mL/min, 210 nm;  $t_{\text{R}} = 6.3$  min (major),  $t_{\text{R}} = 4.3$  min (minor); <sup>1</sup>H NMR (400 MHz, Chloroform-*d*) δ 7.50 (s, 1H), 7.31 – 7.25 (m, 2H), 6.98 (q, *J* = 1.44 Hz, 1H), 6.90 – 6.81 (m, 1H), 5.43 (t, *J* = 4.72 Hz, 1H), 5.35 – 5.18 (m, 1H), 3.42 – 3.30 (m, 1H), 3.22 (dddd, *J* = 12.12, 10.52, 3.25, 1.48 Hz, 1H), 2.47 (dddd, *J* = 14.56, 10.59, 5.46, 4.09 Hz, 1H), 2.30 – 2.07 (m, 1H). <sup>13</sup>C NMR (101 MHz, Chloroform-*d*) δ 150.1, 142.4, 141.2, 135.0, 130.3, 128.4, 126.3, 124.2, 114.7, 72.0, 58.0, 35.9, 29.7. TOF-HRMS Calcd. for C<sub>13</sub>H<sub>12</sub>ClN<sub>4</sub> [M+H<sup>+</sup>]: 259.0745, found 259.0746.

7-(3-fluorophenyl)-4,5,6,7-tetrahydropyrazolo[1,5-*a*]pyrimidine-3-carbonitrile (**2f**)

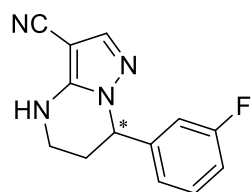

White solid; (PE/EA = 3/1); Yield: 95%; 92% ee;  $[\alpha]_{\text{D}}^{25} = -45.6$  (c = 1.0, CH<sub>2</sub>Cl<sub>2</sub>); HPLC condition: Lux 5u Amylose-1 (250 × 4.60 mm), ipa:hex =20:80, 3.0 mL/min, 210 nm;  $t_{\text{R}} = 14.9$  min (major),  $t_{\text{R}} = 9.8$  min (minor); <sup>1</sup>H NMR (600 MHz, Chloroform-*d*) δ 7.50 (d, *J* = 1.36 Hz, 1H), 7.31 (tdd, *J* = 7.54, 5.79, 1.33 Hz, 1H), 7.06 – 6.90 (m, 1H), 6.78 (dd, *J* = 7.79, 1.59 Hz, 1H), 6.68 (dt, *J* = 9.66, 2.10 Hz, 1H), 5.55 – 5.34 (m, 2H), 3.34 (dp, *J* = 11.05, 3.50 Hz, 1H), 3.21 (tt, *J* = 11.54, 3.27 Hz, 1H), 2.60 – 2.37 (m, 1H), 2.19 (dt, *J* = 11.44, 4.13 Hz, 1H). <sup>13</sup>C NMR (151 MHz, Chloroform-*d*) δ 163.9, 162.3, 150.1, 142.9 (d, *J* = 6.7 Hz), 141.1, 130.6 (d, *J* = 8.3 Hz), 121.6 (d, *J* = 2.9 Hz), 115.1 (d, *J* = 20.9 Hz), 113.2 (d, *J* = 22.5 Hz), 71.9, 58.0, 35.8, 29.7. TOF-HRMS Calcd. for C<sub>13</sub>H<sub>12</sub>FN<sub>4</sub> [M+H<sup>+</sup>]: 243.1041, found 243.1043.

7-(3-bromophenyl)-4,5,6,7-tetrahydropyrazolo[1,5-*a*]pyrimidine-3-carbonitrile (**2g**)

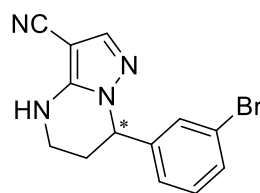

White solid; (PE/EA = 3/1); Yield: 97%; 94% ee;  $[\alpha]_{\text{D}}^{25} = -50.5$  (c = 1.0, CH<sub>2</sub>Cl<sub>2</sub>); SFC condition: Lux 5u Amylose-1 (250 × 4.60 mm), MeOH:CO<sub>2</sub> =20:80, 3.0 mL/min, 210 nm;  $t_{\text{R}} = 8.0$  min (major),  $t_{\text{R}} = 5.2$  min (minor); <sup>1</sup>H NMR (600 MHz, Chloroform-*d*) δ 7.50 (s, 1H), 7.42 (ddd, *J* = 7.94, 2.01, 1.00 Hz, 1H), 7.21 (t, *J* = 7.87 Hz, 1H), 7.14 (t, *J* = 1.93 Hz, 1H), 6.91 (ddt, *J* = 7.76, 1.75, 0.83 Hz, 1H), 5.41 (dd, *J* = 9.99, 5.12 Hz,

2H), 3.39 – 3.30 (m, 1H), 3.21 (dddd,  $J = 12.13, 10.51, 3.24, 1.47$  Hz, 1H), 2.45 (dddd,  $J = 14.31, 10.56, 5.47, 4.03$  Hz, 1H), 2.26 – 2.12 (m, 1H).  $^{13}\text{C}$  NMR (151 MHz, Chloroform-*d*)  $\delta$  150.1, 142.6, 141.2, 131.3, 130.5, 129.2, 124.7, 123.1, 114.7, 72.0, 58.0, 35.8, 29.7. TOF-HRMS Calcd. for  $\text{C}_{13}\text{H}_{12}\text{BrN}_4$   $[\text{M}+\text{H}^+]$ : 303.0240, found 303.0242.

7-(4-fluorophenyl)-4,5,6,7-tetrahydropyrazolo[1,5-*a*]pyrimidine-3-carbonitrile (**2h**)

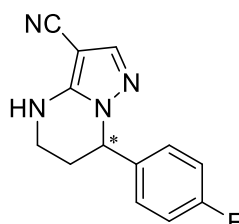

White solid; (PE/EA = 3/1); Yield: 96%; 90% ee;  $[\alpha]_{\text{D}}^{25} = -35.4$  ( $c = 1.0$ ,  $\text{CH}_2\text{Cl}_2$ ); SFC condition: Lux 5u Amylose-1 ( $250 \times 4.60$  mm), MeOH:CO<sub>2</sub> =30:70, 3.0 mL/min, 210 nm;  $t_{\text{R}} = 8.7$  min (major),  $t_{\text{R}} = 6.8$  min (minor);  $^1\text{H}$  NMR (600 MHz, Chloroform-*d*)  $\delta$  7.49 (d,  $J = 1.96$  Hz, 1H), 7.04 (td,  $J = 8.58, 1.82$  Hz, 2H), 7.00 – 6.92 (m, 2H), 5.43 (t,  $J = 4.72$  Hz, 1H), 5.18 (d,  $J = 93.21$  Hz, 1H), 3.36 (dtd,  $J = 15.07, 7.35, 6.27, 3.55$  Hz, 1H), 3.25 (dddd,  $J = 11.58, 9.86, 8.22, 3.13, 1.43$  Hz, 1H), 2.46 (dddd,  $J = 15.99, 7.41, 5.84, 2.92$  Hz, 1H), 2.26 – 2.11 (m, 1H).  $^{13}\text{C}$  NMR (151 MHz, Chloroform-*d*)  $\delta$  163.3, 161.6, 150.1, 141.0, 136.0, 127.8, 127.7, 116.0, 115.8, 71.8, 58.0, 36.0, 30.0. TOF-HRMS Calcd. for  $\text{C}_{13}\text{H}_{12}\text{FN}_4$   $[\text{M}+\text{H}^+]$ : 243.1041, found 243.1043.

7-(4-chlorophenyl)-4,5,6,7-tetrahydropyrazolo[1,5-*a*]pyrimidine-3-carbonitrile (**2i**)

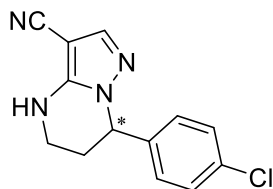

White solid; (PE/EA = 3/1); Yield: 97%; 92% ee;  $[\alpha]_{\text{D}}^{25} = -68.8$  ( $c = 1.0$ ,  $\text{CH}_2\text{Cl}_2$ ); SFC condition: Lux 5u Amylose-1 ( $250 \times 4.60$  mm), MeOH:CO<sub>2</sub> =30:70, 3.0 mL/min, 210 nm;  $t_{\text{R}} = 7.7$  min (major),  $t_{\text{R}} = 6.8$  min (minor);  $^1\text{H}$  NMR (400 MHz, Chloroform-*d*)  $\delta$  7.49 (s, 1H), 7.37 – 7.28 (m, 2H), 7.01 – 6.85 (m, 2H), 5.42 (t,  $J = 4.83$  Hz, 1H), 5.36 (s, 1H), 3.35 (ddt,  $J = 12.27, 5.08, 3.60$  Hz, 1H), 3.21 (dddd,  $J = 12.03, 10.26, 3.31, 1.52$  Hz, 1H), 2.45 (dddd,  $J = 14.06, 9.79, 5.43, 4.06$  Hz, 1H), 2.24 – 2.10 (m, 1H).  $^{13}\text{C}$  NMR (101 MHz, Chloroform-*d*)  $\delta$  150.1, 141.1, 138.8, 134.0, 129.1, 127.5, 114.8, 71.9, 58.0, 35.9, 29.9. TOF-HRMS Calcd. for  $\text{C}_{13}\text{H}_{12}\text{ClN}_4$   $[\text{M}+\text{H}^+]$ : 259.0745, found 259.0746.



7-(4-bromophenyl)-4,5,6,7-tetrahydropyrazolo[1,5-*a*]pyrimidine-3-carbonitrile (**2j**)

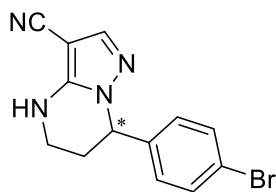

White solid; (PE/EA = 3/1); Yield: 98%; 92% ee;  $[\alpha]_{\text{D}}^{25} = -48.7$  ( $c = 1.0$ ,  $\text{CH}_2\text{Cl}_2$ ); SFC condition: Lux 5u Amylose-1 ( $250 \times 4.60$  mm),  $\text{MeOH}:\text{CO}_2 = 20:80$ , 3.0 mL/min, 210 nm;  $t_{\text{R}} = 14.5$  min (major),  $t_{\text{R}} = 13.6$  min (minor);  $^1\text{H}$  NMR (600 MHz, Chloroform-*d*)  $\delta$  7.59 – 7.37 (m, 3H), 6.96 – 6.77 (m, 2H), 5.40 (t,  $J = 4.87$  Hz, 1H), 5.32 (s, 1H), 3.35 (ddd,  $J = 12.33, 5.85, 3.62$  Hz, 1H), 3.22 (dddd,  $J = 11.98, 10.26, 3.21, 1.47$  Hz, 1H), 2.53 – 2.39 (m, 1H), 2.16 (dq,  $J = 13.66, 4.39$  Hz, 1H).  $^{13}\text{C}$  NMR (101 MHz, Chloroform-*d*)  $\delta$  150.1, 141.1, 139.3, 132.1, 127.8, 122.1, 114.7, 72.0, 58.1, 35.9, 29.8. TOF-HRMS Calcd. for  $\text{C}_{13}\text{H}_{12}\text{BrN}_4$  [ $\text{M}+\text{H}^+$ ]: 303.0240, found 303.0242.

7-(2-methoxyphenyl)-4,5,6,7-tetrahydropyrazolo[1,5-*a*]pyrimidine-3-carbonitrile (**2k**)

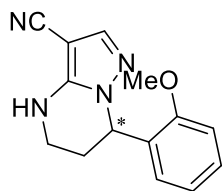

White solid; (PE/EA = 3/1); Yield: 97%; 92% ee;  $[\alpha]_{\text{D}}^{25} = -42.6$  ( $c = 1.0$ ,  $\text{CH}_2\text{Cl}_2$ ); SFC condition: Lux 5u Amylose-1 ( $250 \times 4.60$  mm),  $\text{MeOH} : \text{CO}_2 = 10:90$ , 3.0 mL/min, 210 nm;  $t_{\text{R}} = 3.4$  min (major),  $t_{\text{R}} = 2.7$  min (minor);  $^1\text{H}$  NMR (400 MHz, Chloroform-*d*)  $\delta$  7.49 (s, 1H), 7.30 – 7.22 (m, 1H), 6.95 – 6.79 (m, 2H), 6.45 (dd,  $J = 7.55, 1.68$  Hz, 1H), 5.80 (dd,  $J = 5.49, 3.07$  Hz, 1H), 4.97 (s, 1H), 3.85 (s, 3H), 3.30 (dt,  $J = 11.88, 4.11$  Hz, 1H), 3.20 (td,  $J = 11.61, 3.28$  Hz, 1H), 2.47 – 2.31 (m, 1H), 2.27 (dq,  $J = 13.97, 3.48$  Hz, 1H).  $^{13}\text{C}$  NMR (101 MHz, Chloroform-*d*)  $\delta$  155.5, 150.4, 140.8, 129.1, 128.3, 126.9, 120.7, 114.8, 110.7, 71.8, 55.4, 54.0, 36.0, 27.2. TOF-HRMS Calcd. for  $\text{C}_{14}\text{H}_{15}\text{N}_4\text{O}$  [ $\text{M}+\text{H}^+$ ]: 255.1240, found 255.1240.

7-(2-fluorophenyl)-4,5,6,7-tetrahydropyrazolo[1,5-*a*]pyrimidine-3-carbonitrile (**2l**)

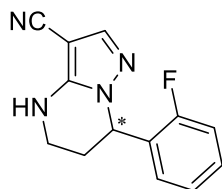

White solid; (PE:EA = 3/1); Yield: 94%; 94% ee;  $[\alpha]_{\text{D}}^{25} = -33.3$  ( $c = 1.0$ ,  $\text{CH}_2\text{Cl}_2$ ); HPLC condition: Lux 5u Amylose-1 ( $250 \times 4.60$  mm), ipa:hex=15:85, 1.0 mL/min, 210 nm;  $t_{\text{R}} = 11.7$  min (major),  $t_{\text{R}} = 9.6$  min (minor);  $^1\text{H}$  NMR (600 MHz, Chloroform-*d*)  $\delta$  7.49 (s, 1H), 7.27 (dddd,  $J = 10.81, 8.34, 5.15, 2.55$  Hz, 1H), 7.13 – 7.01 (m, 2H), 6.62 (td,  $J = 7.80, 1.76$  Hz, 1H), 5.74 (t,  $J = 4.63$  Hz, 1H), 5.45 (s, 1H), 3.34 (dq,  $J = 12.04, 4.01$  Hz, 1H), 3.20 (td,  $J = 11.48, 3.32$  Hz, 1H), 2.51 – 2.38 (m, 1H), 2.26 (dt,  $J = 14.12, 4.02$  Hz, 1H).  $^{13}\text{C}$  NMR (151 MHz, Chloroform-*d*)  $\delta$  159.3 (d,  $J = 246.9$  Hz), 150.5, 141.1,

129.8 (d,  $J = 8.4$  Hz), 127.8 (d,  $J = 3.8$  Hz), 127.5 (d,  $J = 12.9$  Hz), 124.5 (d,  $J = 3.8$  Hz), 115.8 (d,  $J = 20.4$  Hz), 114.8, 71.8, 53.5, 35.9, 28.0; TOF-HRMS Calcd. for  $C_{13}H_{12}FN_4$   $[M+H^+]$ : 243.1041, found 243.1043.

7-(2-chlorophenyl)-4,5,6,7-tetrahydropyrazolo[1,5-a]pyrimidine-3-carbonitrile (**2m**)

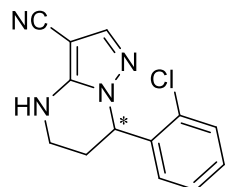

White solid; (PE/EA = 5/1); Yield: 97%; 91% ee;  $[\alpha]_D^{25} = -23.5$  (c = 1.0,  $CH_2Cl_2$ ); HPLC condition: Lux 5u Amylose-1 (250 × 4.60 mm), ipa:hex=20:80, 1.0 mL/min, 210 nm;  $t_R = 8.6$  min (major),  $t_R = 7.1$  min (minor);  $^1H$  NMR (600 MHz, Chloroform-*d*)  $\delta$  7.50 (s, 1H), 7.40 – 7.37 (m, 1H), 7.27 – 7.18 (m, 2H), 6.56 (dd,  $J = 7.31, 2.06$  Hz, 1H), 5.83 (dd,  $J = 5.67, 3.19$  Hz, 1H), 5.46 (s, 1H), 3.32 (dq,  $J = 11.91, 3.88$  Hz, 1H), 3.16 (tdd,  $J = 11.45, 3.19, 1.24$  Hz, 1H), 2.45 (dddd,  $J = 13.97, 11.38, 5.65, 4.11$  Hz, 1H), 2.36 – 2.26 (m, 1H).  $^{13}C$  NMR (151 MHz, CHLOROFORM-*D*)  $\delta$  150.7, 141.3, 137.5, 131.6, 130.2, 129.4, 127.8, 127.2, 114.9, 71.8, 56.2, 35.6, 27.1. TOF-HRMS Calcd. for  $C_{13}H_{12}ClN_4$   $[M+H^+]$ : 259.0745, found 259.0746.

7-(2-bromophenyl)-4,5,6,7-tetrahydropyrazolo[1,5-a]pyrimidine-3-carbonitrile (**2n**)

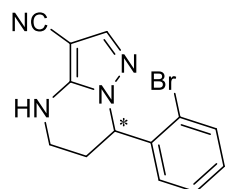

White solid; (PE/EA = 5/1); Yield: 93%; 93% ee;  $[\alpha]_D^{25} = -44.4$  (c = 1.0,  $CH_2Cl_2$ ); HPLC condition: Lux 5u Amylose-1 (250 × 4.60 mm), ipa:hex=15:85, 1.0 mL/min, 210 nm;  $t_R = 11.7$  min (major),  $t_R = 9.5$  min (minor);  $^1H$  NMR (600 MHz, Chloroform-*d*)  $\delta$  7.57 (dd,  $J = 7.97, 1.24$  Hz, 1H), 7.50 (s, 1H), 7.31 – 7.20 (m, 1H), 7.15 (td,  $J = 7.67, 1.69$  Hz, 1H), 6.56 (dd,  $J = 7.76, 1.70$  Hz, 1H), 5.78 (dd,  $J = 5.66, 3.22$  Hz, 1H), 5.44 (s, 1H), 3.32 (dq,  $J = 11.97, 3.94$  Hz, 1H), 3.17 (td,  $J = 11.91, 3.19$  Hz, 1H), 2.52 – 2.39 (m, 1H), 2.32 (dd,  $J = 13.89, 3.69$  Hz, 1H).  $^{13}C$  NMR (151 MHz, CHLOROFORM-*D*)  $\delta$  150.7, 141.3, 139.0, 133.6, 129.6, 127.9, 127.8, 121.5, 114.8, 71.8, 58.3, 35.6, 27.3. TOF-HRMS Calcd. for  $C_{13}H_{12}BrN_4$   $[M+H^+]$ : 303.0240, found 303.0242.

2,7-diphenyl-4,5,6,7-tetrahydropyrazolo[1,5-*a*]pyrimidine-3-carbonitrile (**2o**)

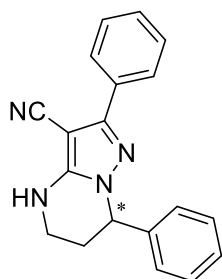

White solid; (PE/EA = 3/1); Yield: 97%; 90% ee;  $[\alpha]_{\text{D}}^{25} = 42.0$  ( $c = 1.0$ ,  $\text{CH}_2\text{Cl}_2$ ); SFC condition: Lux 5u Amylose-1 ( $250 \times 4.60$  mm),  $\text{MeOH}:\text{CO}_2 = 20:80$ , 3.0 mL/min, 210 nm;  $t_{\text{R}} = 8.6$  min (major),  $t_{\text{R}} = 8.0$  min (minor);  $^1\text{H}$  NMR (600 MHz, Chloroform-*d*)  $\delta$  7.93 – 7.84 (m, 2H), 7.41 – 7.36 (m, 2H), 7.36 – 7.32 (m, 3H), 7.30 – 7.26 (m, 1H), 7.02 (dd,  $J = 7.94$ , 1.32 Hz, 2H), 5.56 (dd,  $J = 5.43$ , 3.09 Hz, 1H), 5.17 – 4.99 (m, 1H), 3.35 (dq,  $J = 11.79$ , 3.89 Hz, 1H), 3.22 (tdd,  $J = 11.85$ , 3.10, 1.21 Hz, 1H), 2.52 (dddd,  $J = 13.75$ , 11.68, 5.41, 4.21 Hz, 1H), 2.27 – 2.14 (m, 1H).  $^{13}\text{C}$  NMR (151 MHz, Chloroform-*d*)  $\delta$  151.5, 151.2, 140.6, 131.5, 129.1, 128.9, 128.7, 128.0, 126.5, 125.9, 115.8, 69.8, 58.3, 35.5, 29.8. TOF-HRMS Calcd. for  $\text{C}_{19}\text{H}_{17}\text{N}_4$   $[\text{M}+\text{H}^+]$ : 301.1448, found 301.1448.

ethyl-7-phenyl-4,5,6,7-tetrahydropyrazolo[1,5-*a*]pyrimidine-3-carboxylate (**2p**)

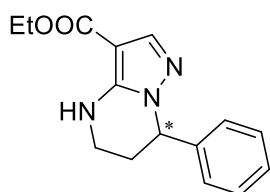

White solid; (PE/EA = 3/1); Yield: 96%; 91% ee;  $[\alpha]_{\text{D}}^{25} = -65.0$  ( $c = 1.0$ ,  $\text{CH}_2\text{Cl}_2$ ); HPLC condition: Lux 5u Amylose-1 ( $250 \times 4.60$  mm), ipa:hex = 20:80, 1.0 mL/min, 210 nm;  $t_{\text{R}} = 17.3$  min (major),  $t_{\text{R}} = 15.9$  min (minor);  $^1\text{H}$  NMR (600 MHz, Chloroform-*d*)  $\delta$  7.63 (s, 1H), 7.31 (td,  $J = 7.59$ , 2.01 Hz, 2H), 7.27 – 7.22 (m, 1H), 7.08 – 6.84 (m, 2H), 5.90 (s, 1H), 5.44 (q,  $J = 4.80$ , 3.54 Hz, 1H), 4.26 (qt,  $J = 7.10$ , 1.74 Hz, 2H), 3.33 (dp,  $J = 11.70$ , 3.91 Hz, 1H), 3.23 (tt,  $J = 11.52$ , 3.52 Hz, 1H), 2.64 – 2.39 (m, 1H), 2.18 (ddd,  $J = 13.78$ , 5.84, 2.64 Hz, 1H), 1.33 (td,  $J = 7.13$ , 1.72 Hz, 3H).  $^{13}\text{C}$  NMR (151 MHz, Chloroform-*d*)  $\delta$  164.5, 149.1, 141.1, 139.9, 128.8, 127.8, 126.0, 93.6, 59.5, 58.1, 35.4, 30.0, 14.6. TOF-HRMS Calcd. for  $\text{C}_{15}\text{H}_{18}\text{N}_3\text{O}_2$   $[\text{M}+\text{H}^+]$ : 272.1394, found 272.1395.

7-(pyridin-2-yl)-4,5,6,7-tetrahydropyrazolo[1,5-*a*]pyrimidine-3-carbonitrile (**2q**)

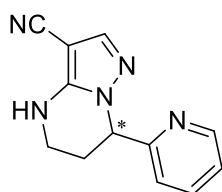

White solid; (PE/EA = 3/1); Yield: 97%; 95% ee;  $[\alpha]_{\text{D}}^{25} = -63.4$  ( $c = 1.0$ ,  $\text{CH}_2\text{Cl}_2$ ); HPLC condition: Lux 5u Cellulose-2 ( $250 \times 4.60$  mm), ipa:hex = 30:70, 1.0 mL/min, 210 nm;  $t_{\text{R}} = 24.7$  min (major),  $t_{\text{R}} = 13.4$  min (minor);  $^1\text{H}$  NMR (600 MHz, Chloroform-*d*)  $\delta$  8.57 (d,  $J = 4.79$  Hz, 1H), 7.65 (tt,  $J = 7.76$ , 1.65 Hz, 1H), 7.51 (d,  $J = 1.34$  Hz, 1H), 7.23 – 7.15

(m, 1H), 6.86 (d,  $J = 7.84$  Hz, 1H), 5.51 (t,  $J = 4.46$  Hz, 1H), 5.41 (s, 1H), 3.33 (dq,  $J = 12.25, 4.07$  Hz, 1H), 3.26 – 3.11 (m, 1H), 2.55 (dt,  $J = 11.48, 3.62$  Hz, 1H), 2.43 (ddt,  $J = 14.55, 12.51, 4.96$  Hz, 1H).  $^{13}\text{C}$  NMR (151 MHz, Chloroform-*d*)  $\delta$  159.0, 150.1, 149.7, 141.1, 137.1, 122.9, 121.2, 114.9, 71.9, 59.4, 36.0, 27.4. TOF-HRMS Calcd. for  $\text{C}_{12}\text{H}_{12}\text{N}_5$  [ $\text{M}+\text{H}^+$ ]: 226.1087, found 226.1089.

7-isopropyl-4,5,6,7-tetrahydropyrazolo[1,5-*a*]pyrimidine-3-carbonitrile (**2r**)

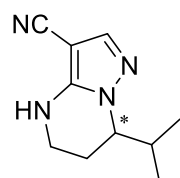

White solid; (PE/EA = 3/1); Yield: 70%; 70% ee;  $[\alpha]_{\text{D}}^{25} = +42.3$  ( $c = 1.0$ ,  $\text{CH}_2\text{Cl}_2$ ); SFC condition: Lux 5u Amylose-1 (250  $\times$  4.60 mm), MeOH:CO<sub>2</sub> =20:80, 1.0 mL/min, 210 nm;  $t_{\text{R}} = 3.3$  min (major),  $t_{\text{R}} = 3.0$  min (minor);  $^1\text{H}$  NMR (600 MHz, Chloroform-*d*)  $\delta$  7.43 (s, 1H), 5.13 (d,  $J = 17.92$  Hz, 1H), 3.96 (q,  $J = 6.01$  Hz, 1H), 3.46 – 3.37 (m, 1H), 3.37 – 3.30 (m, 1H), 2.60 – 2.44 (m, 1H), 2.01 (ddd,  $J = 22.73, 9.99, 5.17$  Hz, 2H), 1.01 (d,  $J = 6.97$  Hz, 3H), 0.82 (d,  $J = 6.78$  Hz, 3H).  $^{13}\text{C}$  NMR (151 MHz, Chloroform-*d*)  $\delta$  149.9, 140.0, 115.1, 71.9, 60.1, 37.9, 30.4, 22.1, 19.1, 16.8. TOF-HRMS Calcd. for  $\text{C}_{10}\text{H}_{15}\text{N}_4$  [ $\text{M}+\text{H}^+$ ]: 191.1291, found 191.1294.

7-(*tert*-butyl)-4,5,6,7-tetrahydropyrazolo[1,5-*a*]pyrimidine-3-carbonitrile (**2s**)

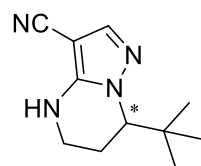

White solid; (PE/EA = 3/1); Yield: 65%; 60% ee;  $[\alpha]_{\text{D}}^{25} = +34.5$  ( $c = 1.0$ ,  $\text{CH}_2\text{Cl}_2$ ); HPLC condition: Lux 5u Amylose-1 (250  $\times$  4.60 mm), ipa:hex =20:80, 1.0 mL/min, 210 nm;  $t_{\text{R}} = 5.8$  min (major),  $t_{\text{R}} = 6.3$  min (minor);  $^1\text{H}$  NMR (600 MHz, Chloroform-*d*)  $\delta$  7.43 (dd,  $J = 2.36, 1.32$  Hz, 1H), 5.03 (s, 1H), 3.97 (ddd,  $J = 5.72, 4.02, 1.35$  Hz, 1H), 3.48 – 3.41 (m, 1H), 3.39 (td,  $J = 7.82, 6.77, 3.49$  Hz, 1H), 2.23 (dtt,  $J = 10.60, 4.55, 2.72$  Hz, 1H), 2.08 – 1.95 (m, 1H), 1.03 (d,  $J = 1.39$  Hz, 9H).  $^{13}\text{C}$  NMR (151 MHz, Chloroform-*d*)  $\delta$  150.0, 139.6, 115.2, 71.3, 63.0, 37.8, 36.1, 27.9, 23.5. TOF-HRMS Calcd. for  $\text{C}_{11}\text{H}_{17}\text{N}_4$  [ $\text{M}+\text{H}^+$ ]: 205.1448, found 205.1450.

*tert*-butyl 4-(3-cyano-2-(4-phenoxyphenyl)-4,5,6,7-tetrahydropyrazolo[1,5-*a*]pyrimidin-7-yl)piperidine-1-carboxylate (**2t**)

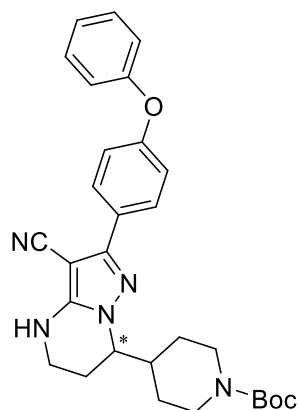

White solid; (PE/EA = 3/1); Yield: 96%; 91% ee;  $[\alpha]_{\text{D}}^{25} = +21.6$  ( $c = 1.0$ ,  $\text{CH}_2\text{Cl}_2$ ); HPLC condition: Lux 5u Amylose-1 ( $250 \times 4.60$  mm), MeOH:CO<sub>2</sub> = 20:80, 1.0 mL/min, 210 nm;  $t_{\text{R}} = 14.8$  min (major),  $t_{\text{R}} = 18.4$  min (minor); <sup>1</sup>H NMR (600 MHz, Chloroform-*d*)  $\delta$  7.85 (d,  $J = 7.96$  Hz, 2H), 7.39 – 7.30 (m, 2H), 7.12 (d,  $J = 7.85$  Hz, 1H), 7.03 (d,  $J = 8.04$  Hz, 4H), 4.97 (s, 1H), 4.18 (s, 2H), 4.07 (d,  $J = 6.82$  Hz, 1H), 3.42 (s, 2H), 2.68 (s, 2H), 2.29 (s, 1H), 2.07 (dd,  $J = 26.75, 18.92$  Hz, 2H), 1.69 (d,  $J = 13.23$  Hz, 1H), 1.44 (d,  $J = 2.88$  Hz, 9H), 1.38 (s, 1H), 1.30 (t,  $J = 16.52$  Hz, 2H). <sup>13</sup>C NMR (151 MHz, Chloroform-*d*)  $\delta$  158.1, 156.9, 154.8, 149.9, 129.9, 128.0, 126.7, 123.7, 119.3, 118.9, 115.9, 79.7, 69.8, 68.1, 58.8, 39.3, 28.5, 27.0, 22.9.<sup>[5]</sup>

2,7-diphenyl-4,5,6,7-tetrahydropyrazolo[1,5-*a*]pyrimidine (**4a**)

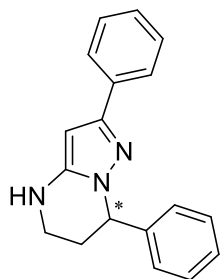

White solid; (PE/EA = 3/1); Yield: 94%; 92% ee;  $[\alpha]_{\text{D}}^{25} = +21.6$  ( $c = 1.0$ ,  $\text{CH}_2\text{Cl}_2$ ); SFC condition: Lux 5u Amylose-1 ( $250 \times 4.60$  mm), MeOH:CO<sub>2</sub> = 30:70, 3.0 mL/min, 210 nm;  $t_{\text{R}} = 6.7$  min (major),  $t_{\text{R}} = 12.2$  min (minor); <sup>1</sup>H NMR (600 MHz, Chloroform-*d*)  $\delta$  7.77 – 7.69 (m, 2H), 7.31 (dt,  $J = 17.25, 7.62$  Hz, 4H), 7.27 – 7.21 (m, 2H), 7.06 – 6.95 (m, 2H), 5.73 (s, 1H), 5.60 (dd,  $J = 5.58, 3.13$  Hz, 1H), 4.21 (s, 1H), 3.15 (dt,  $J = 8.61, 2.52$  Hz, 2H), 2.55 (dtd,  $J = 13.31, 7.63, 5.54$  Hz, 1H), 2.16 (dq,  $J = 13.50, 3.39$  Hz, 1H). <sup>13</sup>C NMR (151 MHz, Chloroform-*d*)  $\delta$  150.9, 147.0, 142.5, 134.1, 128.6, 128.4, 127.5, 127.4, 126.2, 125.7, 83.5, 58.4, 36.0, 31.0.

7-phenyl-2-(*o*-tolyl)-4,5,6,7-tetrahydropyrazolo[1,5-*a*]pyrimidine (**4b**)

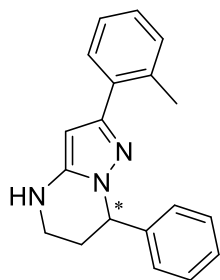

White solid; (PE/EA = 3/1); Yield: 95%; 91% ee;  $[\alpha]_{\text{D}}^{25} = +135.5$  ( $c = 2.0$ ,  $\text{CH}_2\text{Cl}_2$ ); SFC condition: Lux 5u Amylose-1 ( $250 \times 4.60$  mm), MeOH:CO<sub>2</sub> = 20:80, 3.0 mL/min, 210 nm;  $t_{\text{R}} = 3.5$  min (major),  $t_{\text{R}} = 6.7$  min (minor); <sup>1</sup>H NMR (600 MHz, Chloroform-*d*)  $\delta$  7.53 – 7.46 (m, 1H), 7.31 (t,  $J = 7.54$  Hz, 2H), 7.26 – 7.21 (m, 1H), 7.20 – 7.13 (m, 3H), 7.01 (d,  $J = 7.65$  Hz, 2H), 5.63 – 5.49 (m, 2H), 4.14 (s, 1H), 3.23 – 3.10 (m,

2H), 2.58 (ddt,  $J = 11.23, 9.18, 5.66$  Hz, 1H), 2.43 (s, 3H), 2.18 (dq,  $J = 13.57, 3.70$  Hz, 1H).  $^{13}\text{C}$  NMR (151 MHz, Chloroform-*d*)  $\delta$  151.4, 146.3, 142.7, 136.2, 134.2, 130.6, 129.4, 128.5, 127.5, 127.3, 126.2, 125.6, 86.9, 58.4, 36.3, 31.2, 21.2. TOF-HRMS Calcd. for  $\text{C}_{19}\text{H}_{20}\text{N}_3$  [ $\text{M}+\text{H}^+$ ]: 290.1652, found 290.1651.

2-(2-methoxyphenyl)-7-phenyl-4,5,6,7-tetrahydropyrazolo[1,5-*a*]pyrimidine (**4c**)

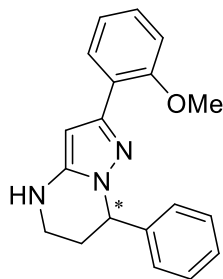

White solid; (PE/EA = 3/1); Yield: 96%; 90% ee;  $[\alpha]_{\text{D}}^{25} = +25.0$  ( $c = 1.0$ ,  $\text{CH}_2\text{Cl}_2$ ); SFC condition: Lux 5u Amylose-1 (250  $\times$  4.60 mm), MeOH:CO<sub>2</sub> = 20:80, 3.0 mL/min, 210 nm;  $t_{\text{R}} = 11.8$  min (major),  $t_{\text{R}} = 13.9$  min (minor);  $^1\text{H}$  NMR (600 MHz, Chloroform-*d*)  $\delta$  7.84 (dd,  $J = 7.64, 1.80$  Hz, 1H), 7.29 (dd,  $J = 8.29, 7.00$  Hz, 2H), 7.24 – 7.19 (m, 2H), 7.01 (dd,  $J = 7.88, 1.41$  Hz, 2H), 6.94 – 6.88 (m, 2H), 6.01 (s, 1H), 5.61 (dd,  $J = 5.60, 3.26$  Hz, 1H), 4.11 (q,  $J = 5.01, 2.84$  Hz, 1H), 3.88 (s, 3H), 3.17 (dd,  $J = 8.95, 3.18$  Hz, 2H), 2.61 – 2.49 (m, 1H), 2.17 (dq,  $J = 13.54, 3.41$  Hz, 1H).  $^{13}\text{C}$  NMR (151 MHz, Chloroform-*d*)  $\delta$  156.9, 147.8, 146.2, 142.7, 128.9, 128.6, 128.5, 127.3, 126.2, 123.1, 120.8, 111.3, 87.8, 58.4, 55.6, 36.2, 31.2. TOF-HRMS Calcd. for  $\text{C}_{19}\text{H}_{20}\text{N}_3\text{O}$  [ $\text{M}+\text{H}^+$ ]: 306.1601, found 306.1602.

7-phenyl-2-(*m*-tolyl)-4,5,6,7-tetrahydropyrazolo[1,5-*a*]pyrimidine (**4d**)

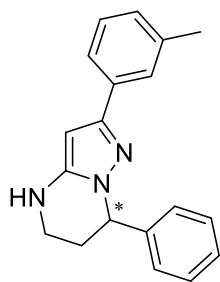

White solid; (PE/EA = 3/1); Yield: 95%; 90% ee;  $[\alpha]_{\text{D}}^{25} = +140.2$  ( $c = 2.0$ ,  $\text{CH}_2\text{Cl}_2$ ); SFC condition: Lux 5u Amylose-1 (250  $\times$  4.60 mm), MeOH:CO<sub>2</sub> = 30:70, 3.0 mL/min, 210 nm;  $t_{\text{R}} = 6.4$  min (major),  $t_{\text{R}} = 27.9$  min (minor);  $^1\text{H}$  NMR (600 MHz, Chloroform-*d*)  $\delta$  7.58 (tt,  $J = 1.74, 0.77$  Hz, 1H), 7.50 (ddd,  $J = 7.79, 2.10, 1.07$  Hz, 1H), 7.29 (dd,  $J = 8.20, 6.93$  Hz, 2H), 7.22 (td,  $J = 7.52, 1.99$  Hz, 2H), 7.06 (ddd,  $J = 7.48, 1.87, 0.94$  Hz, 1H), 7.01 – 6.96 (m, 2H), 5.73 (s, 1H), 5.61 (dd,  $J = 5.57, 3.03$  Hz, 1H), 4.16 (s, 1H), 3.22 – 3.10 (m, 2H), 2.56 (dtd,  $J = 13.32, 7.79, 5.47$  Hz, 1H), 2.33 (s, 3H), 2.17 (dd,  $J = 13.47, 3.34$  Hz, 1H).  $^{13}\text{C}$  NMR (151 MHz, Chloroform-*d*)  $\delta$  151.1, 146.9, 142.5, 138.0, 134.0, 128.6, 128.3, 128.3, 127.3, 126.3, 126.1, 122.9, 83.6, 58.4, 36.0, 31.0, 21.5. TOF-HRMS Calcd. for  $\text{C}_{19}\text{H}_{20}\text{N}_3$  [ $\text{M}+\text{H}^+$ ]: 290.1652, found 290.1651.

7-phenyl-2-(*p*-tolyl)-4,5,6,7-tetrahydropyrazolo[1,5-*a*]pyrimidine (**4e**)

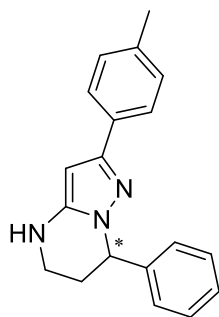

White solid; (PE/EA = 3/1); Yield: 94%; 93% ee;  $[\alpha]_{\text{D}}^{25} = +129.6$  ( $c = 2.0$ ,  $\text{CH}_2\text{Cl}_2$ ); HPLC condition: Lux 5u Amylose-1 (250 × 4.60 mm), ipa:hex = 20:80, 1.0 mL/min, 210 nm;  $t_{\text{R}} = 10.8$  min (major),  $t_{\text{R}} = 13.1$  min (minor);  $^1\text{H NMR}$  (600 MHz, Chloroform-*d*)  $\delta$  7.61 (d,  $J = 8.16$  Hz, 2H), 7.31 – 7.27 (m, 2H), 7.24 – 7.19 (m, 1H), 7.17 – 7.09 (m, 2H), 7.04 – 6.94 (m, 2H), 5.71 (s, 1H), 5.59 (dd,  $J = 5.57$ , 3.11 Hz, 1H), 4.13 (s, 1H), 3.17 (dd,  $J = 8.07$ , 3.18 Hz, 2H), 2.61 – 2.50 (m, 1H), 2.32 (s, 3H), 2.17 (dq,  $J = 13.51$ , 3.35 Hz, 1H).  $^{13}\text{C NMR}$  (151 MHz, Chloroform-*d*)  $\delta$  151.0, 146.9, 142.5, 137.2, 131.3, 129.1, 128.5, 127.3, 126.2, 125.6, 83.4, 58.3, 36.1, 31.0, 21.3. TOF-HRMS Calcd. for  $\text{C}_{19}\text{H}_{20}\text{N}_3$   $[\text{M}+\text{H}^+]$ : 290.1652, found 290.1651.

2-(4-methoxyphenyl)-7-phenyl-4,5,6,7-tetrahydropyrazolo[1,5-*a*]pyrimidine (**4f**)

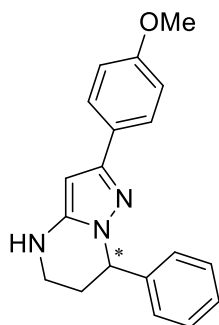

White solid; (PE/EA = 3/1); Yield: 96%; 91% ee;  $[\alpha]_{\text{D}}^{25} = +38.4$  ( $c = 1.0$ ,  $\text{CH}_2\text{Cl}_2$ ); HPLC condition: Lux 5u Amylose-1 (250 × 4.60 mm), ipa:hex = 30:70, 1.0 mL/min, 254 nm;  $t_{\text{R}} = 9.9$  min (major),  $t_{\text{R}} = 12.9$  min (minor);  $^1\text{H NMR}$  (600 MHz, Chloroform-*d*)  $\delta$  7.70 – 7.61 (m, 2H), 7.29 (dd,  $J = 8.36$ , 6.94 Hz, 2H), 7.24 – 7.20 (m, 1H), 7.00 (dd,  $J = 7.23$ , 1.68 Hz, 2H), 6.88 – 6.81 (m, 2H), 5.67 (s, 1H), 5.58 (dd,  $J = 5.56$ , 3.12 Hz, 1H), 4.14 (s, 1H), 3.79 (s, 3H), 3.25 – 3.04 (m, 2H), 2.55 (dtd,  $J = 13.30$ , 7.71, 5.45 Hz, 1H), 2.16 (dq,  $J = 13.52$ , 3.43 Hz, 1H).  $^{13}\text{C NMR}$  (151 MHz, Chloroform-*d*)  $\delta$  159.3, 150.8, 146.9, 142.6, 128.6, 127.3, 127.0, 126.9, 126.2, 113.8, 83.1, 58.3, 55.4, 36.1, 31.0. TOF-HRMS Calcd. for  $\text{C}_{19}\text{H}_{20}\text{N}_3\text{O}$   $[\text{M}+\text{H}^+]$ : 306.1601, found 306.1602.

2-(2-chlorophenyl)-7-phenyl-4,5,6,7-tetrahydropyrazolo[1,5-*a*]pyrimidine (**4g**)

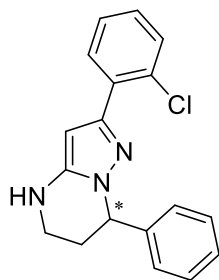

White solid; (PE/EA = 3/1); Yield: 91%; 91% ee;  $[\alpha]_{\text{D}}^{25} = +56.4$  ( $c = 1.0$ ,  $\text{CH}_2\text{Cl}_2$ ); SFC condition: Lux 5u Amylose-1 (250 × 4.60 mm), MeOH:CO<sub>2</sub> = 20:80, 3.0 mL/min, 210 nm;  $t_{\text{R}} = 8.4$  min (major),  $t_{\text{R}} = 16.1$  min (minor);  $^1\text{H NMR}$  (600 MHz, Chloroform-*d*)  $\delta$  7.78 – 7.66 (m, 1H), 7.38 (dd,  $J = 7.64$ , 1.62 Hz, 1H), 7.31 (dd,  $J = 8.33$ , 7.02 Hz, 2H), 7.25 – 7.15 (m, 3H), 7.05 – 6.97 (m, 2H), 5.96 (s, 1H), 5.59 (dd,  $J = 5.56$ ,

3.41 Hz, 1H), 4.27 – 4.08 (m, 1H), 3.25 – 3.09 (m, 2H), 2.65 – 2.49 (m, 1H), 2.18 (dq,  $J = 13.59, 3.54$  Hz, 1H).  $^{13}\text{C}$  NMR (151 MHz, Chloroform-*d*)  $\delta$  148.7, 146.2, 142.5, 133.2, 132.3, 130.8, 130.2, 128.6, 128.6, 127.4, 126.7, 126.2, 87.7, 58.5, 36.2, 31.1. TOF-HRMS Calcd. for  $\text{C}_{18}\text{H}_{17}\text{ClN}_3$  [ $\text{M}+\text{H}^+$ ]: 310.1106, found 310.1102.

2-(3-fluorophenyl)-7-phenyl-4,5,6,7-tetrahydropyrazolo[1,5-*a*]pyrimidine (**4h**)

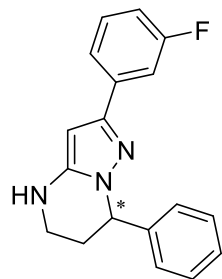

White solid; (PE/EA = 3/1); Yield: 94%; 93% ee;  $[\alpha]_{\text{D}}^{25} = +67.3$  ( $c = 1.0$ ,  $\text{CH}_2\text{Cl}_2$ ); HPLC condition: Lux 5u Amylose-1 ( $250 \times 4.60$  mm), ipa:hex = 20:80, 1.0 mL/min, 210 nm;  $t_{\text{R}} = 8.5$  min (major),  $t_{\text{R}} = 10.1$  min (minor);  $^1\text{H}$  NMR (600 MHz, Chloroform-*d*)  $\delta$  7.49 (dd,  $J = 7.78, 1.52$  Hz, 1H), 7.42 (dt,  $J = 10.45, 1.99$  Hz, 1H), 7.30 (t,  $J = 7.59$  Hz, 2H), 7.28 – 7.21 (m, 2H), 7.00 (d,  $J = 7.63$  Hz, 2H), 6.92 (td,  $J = 8.45, 2.61$  Hz, 1H), 5.70 (d,  $J = 3.70$  Hz, 1H), 5.58 (dt,  $J = 5.12, 2.35$  Hz, 1H), 4.24 (d,  $J = 8.68$  Hz, 1H), 3.25 – 3.06 (m, 2H), 2.55 (dtt,  $J = 16.26, 7.55, 5.14$  Hz, 1H), 2.17 (dp,  $J = 13.94, 3.57$  Hz, 1H).  $^{13}\text{C}$  NMR (151 MHz, Chloroform-*d*)  $\delta$  163.1 (d,  $J = 244.3$  Hz), 149.8, 147.1, 142.3, 136.4, 129.8 (d,  $J = 8.3$  Hz), 128.6, 127.4, 126.1, 121.2 (d,  $J = 2.8$  Hz), 114.2 (d,  $J = 21.1$  Hz), 112.4 (d,  $J = 22.4$  Hz), 83.6, 58.5, 36.0, 30.9. TOF-HRMS Calcd. for  $\text{C}_{18}\text{H}_{17}\text{FN}_3$  [ $\text{M}+\text{H}^+$ ]: 294.1401, found 294.1406.

2-(4-fluorophenyl)-7-phenyl-4,5,6,7-tetrahydropyrazolo[1,5-*a*]pyrimidine (**4i**)

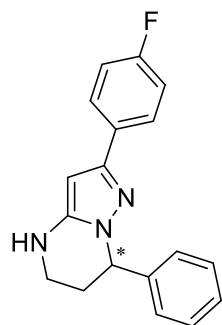

White solid; (PE/EA = 3/1); Yield: 94%; 92% ee;  $[\alpha]_{\text{D}}^{25} = +40.4$  ( $c = 1.0$ ,  $\text{CH}_2\text{Cl}_2$ ); SFC condition: Lux 5u Cellulose-2 ( $250 \times 4.60$  mm), MeOH: $\text{CO}_2 = 20:80$ , 3.0 mL/min, 210 nm;  $t_{\text{R}} = 16.2$  min (major),  $t_{\text{R}} = 8.1$  min (minor);  $^1\text{H}$  NMR (600 MHz, Chloroform-*d*)  $\delta$  7.74 – 7.58 (m, 2H), 7.35 – 7.27 (m, 2H), 7.25 – 7.21 (m, 1H), 7.06 – 6.93 (m, 4H), 5.68 (s, 1H), 5.58 (dd,  $J = 5.56, 3.18$  Hz, 1H), 4.17 (s, 1H), 3.25 – 3.01 (m, 2H), 2.60 – 2.46 (m, 1H), 2.17 (dq,  $J = 13.51, 3.36$  Hz, 1H).  $^{13}\text{C}$  NMR (151 MHz, Chloroform-*d*)  $\delta$  163.3, 161.7, 150.0, 147.0, 142.3, 130.3, 128.6, 127.4, 127.3, 127.2, 126.1, 115.2 (d,  $J = 21.6$  Hz), 83.3, 58.4, 36.0, 30.9. TOF-HRMS Calcd. for  $\text{C}_{18}\text{H}_{17}\text{FN}_3$  [ $\text{M}+\text{H}^+$ ]: 294.1401, found 294.1406.



2-(4-chlorophenyl)-7-phenyl-4,5,6,7-tetrahydropyrazolo[1,5-*a*]pyrimidine (**4j**)

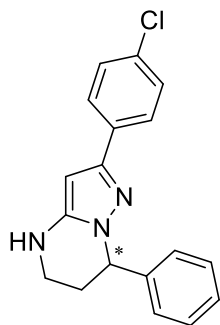

White solid; (PE/EA = 3/1); Yield: 90%; 91% ee;  $[\alpha]_{\text{D}}^{25} = +91.4$  ( $c = 2.0$ ,  $\text{CH}_2\text{Cl}_2$ ); HPLC condition: Lux 5u Amylose-1 (250 × 4.60 mm), ipa:hex =20:80, 1.0 mL/min, 210 nm;  $t_{\text{R}} = 12.2$  min (major),  $t_{\text{R}} = 13.2$  min (minor);  $^1\text{H}$  NMR (600 MHz, Chloroform-*d*)  $\delta$  7.69 – 7.60 (m, 2H), 7.33 – 7.26 (m, 4H), 7.25 – 7.21 (m, 1H), 7.00 (dd,  $J = 7.18$ , 1.72 Hz, 2H), 5.69 (s, 1H), 5.58 (dd,  $J = 5.51$ , 3.21 Hz, 1H), 4.19 (s, 1H), 3.25 – 2.99 (m, 2H), 2.64 – 2.46 (m, 1H), 2.17 (dq,  $J = 13.50$ , 3.38 Hz, 1H).  $^{13}\text{C}$  NMR (151 MHz, Chloroform-*d*)  $\delta$  163.3, 161.7, 150.0, 147.0, 142.3, 130.3, 128.6, 127.4, 127.3, 127.2, 126.1, 115.2 (d,  $J = 21.6$  Hz), 83.3, 58.4, 36.0, 30.9. TOF-HRMS Calcd. for  $\text{C}_{18}\text{H}_{17}\text{ClN}_3$  [ $\text{M}+\text{H}^+$ ]: 310.1106, found 310.1102.

2-(4-bromophenyl)-7-phenyl-4,5,6,7-tetrahydropyrazolo[1,5-*a*]pyrimidine (**4k**)

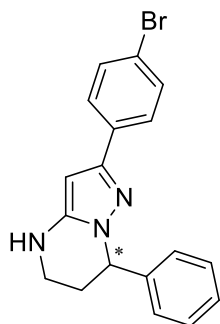

White solid; (PE/EA = 3/1); Yield: 90%; 94% ee;  $[\alpha]_{\text{D}}^{25} = +43.5$  ( $c = 1.0$ ,  $\text{CH}_2\text{Cl}_2$ ); HPLC condition: Lux 5u Amylose-1 (250 × 4.60 mm), ipa:hex =30:70, 1.0 mL/min, 254 nm;  $t_{\text{R}} = 13.8$  min (major),  $t_{\text{R}} = 16.0$  min (minor);  $^1\text{H}$  NMR (600 MHz, Chloroform-*d*)  $\delta$  7.62 – 7.54 (m, 2H), 7.47 – 7.40 (m, 2H), 7.30 (t,  $J = 7.60$  Hz, 2H), 7.26 – 7.20 (m, 1H), 7.04 – 6.95 (m, 2H), 5.68 (s, 1H), 5.57 (dd,  $J = 5.56$ , 3.23 Hz, 1H), 4.22 (s, 1H), 3.15 (dt,  $J = 7.19$ , 2.59 Hz, 2H), 2.53 (dtd,  $J = 13.35$ , 7.66, 5.43 Hz, 1H), 2.16 (dq,  $J = 13.57$ , 3.46 Hz, 1H).  $^{13}\text{C}$  NMR (151 MHz, Chloroform-*d*)  $\delta$  149.8, 147.1, 142.3, 133.1, 131.5, 128.6, 127.5, 127.3, 126.1, 121.3, 83.4, 58.5, 36.0, 30.9. TOF-HRMS Calcd. for  $\text{C}_{18}\text{H}_{17}\text{BrN}_3$  [ $\text{M}+\text{H}^+$ ]: 354.0600, found 354.0595.

7-phenyl-2-(4-(trifluoromethyl)phenyl)-4,5,6,7-tetrahydropyrazolo[1,5-*a*]pyrimidine (**4l**)

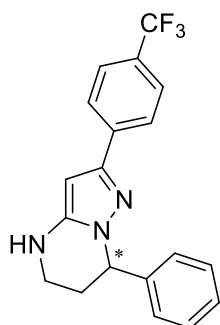

White solid; (PE/EA = 3/1); Yield: 96%; 91% ee;  $[\alpha]_{\text{D}}^{25} = +160.9$  ( $c = 2.0$ ,  $\text{CH}_2\text{Cl}_2$ ); SFC condition: Lux 5u Amylose-1 (250 × 4.60 mm),  $\text{CO}_2:\text{MeOH} = 20:80$ , 3.0 mL/min, 210 nm;  $t_{\text{R}} = 5.3$  min (major),  $t_{\text{R}} = 6.8$  min (minor);  $^1\text{H}$  NMR (600 MHz, Chloroform-*d*)  $\delta$  7.81 (d,  $J = 8.15$  Hz, 2H), 7.56 (d,  $J = 8.20$  Hz, 2H), 7.31 (dd,  $J = 8.21$ , 7.02 Hz, 2H), 7.27 – 7.21 (m, 1H), 7.00 (dd,  $J = 7.27$ , 1.84 Hz, 2H), 5.76

(s, 1H), 5.60 (dd,  $J = 5.53, 3.24$  Hz, 1H), 4.25 (s, 1H), 3.28 – 3.08 (m, 2H), 2.63 – 2.47 (m, 1H), 2.18 (dq,  $J = 13.56, 3.47$  Hz, 1H).  $^{13}\text{C}$  NMR (151 MHz, Chloroform-*d*)  $\delta$  149.4, 147.2, 142.2, 137.5, 129.2 (d,  $J = 32.3$  Hz), 128.6, 127.5, 126.0, 125.7, 125.4 (d,  $J = 4.3$  Hz), 123.5, 83.7, 58.5, 36.0, 30.9. TOF-HRMS Calcd. for  $\text{C}_{19}\text{H}_{17}\text{F}_3\text{N}_3$  [ $\text{M}+\text{H}^+$ ]: 344.1369, found 344.1367.

2-(naphthalen-2-yl)-7-phenyl-4,5,6,7-tetrahydropyrazolo[1,5-*a*]pyrimidine (**4m**)

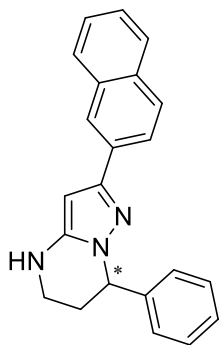

White solid; (PE/EA = 3/1); Yield: 94%; 94% ee;  $[\alpha]_{\text{D}}^{25} = +129.6$  (c = 2.0,  $\text{CH}_2\text{Cl}_2$ ); HPLC condition: Lux 5u Amylose-1 (250  $\times$  4.60 mm), ipa:hex = 30:70, 1.0 mL/min, 254 nm;  $t_{\text{R}} = 8.6$  min (major),  $t_{\text{R}} = 21.0$  min (minor);  $^1\text{H}$  NMR (400 MHz, Chloroform-*d*)  $\delta$  8.17 (d,  $J = 1.63$  Hz, 1H), 7.89 (dd,  $J = 8.54, 1.74$  Hz, 1H), 7.80 (ddd,  $J = 12.75, 8.77, 3.08$  Hz, 3H), 7.48 – 7.36 (m, 2H), 7.31 (dd,  $J = 8.23, 6.56$  Hz, 2H), 7.27 – 7.19 (m, 1H), 7.04 (dd,  $J = 7.46, 1.67$  Hz, 2H), 5.86 (s, 1H), 5.64 (dd,  $J = 5.53, 3.12$  Hz, 1H), 4.21 (s, 1H), 3.17 (ddd,  $J = 5.86, 3.90, 2.35$  Hz, 2H), 2.68 – 2.43 (m, 1H), 2.18 (dq,  $J = 13.57, 3.50$  Hz, 1H).  $^{13}\text{C}$  NMR (151 MHz, Chloroform-*d*)  $\delta$  150.9, 147.1, 142.5, 133.7, 133.1, 131.5, 128.6, 128.2, 128.0, 127.7, 127.4, 126.2, 126.0, 125.6, 124.3, 124.0, 83.7, 58.5, 36.0, 31.0. TOF-HRMS Calcd. for  $\text{C}_{22}\text{H}_{20}\text{N}_3$  [ $\text{M}+\text{H}^+$ ]: 326.1652, found 326.1654.

7-phenyl-2-(thiophen-2-yl)-4,5,6,7-tetrahydropyrazolo[1,5-*a*]pyrimidine (**4n**)

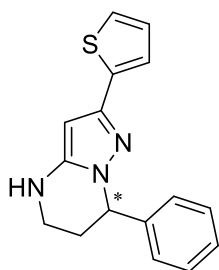

White solid; (PE/EA = 3/1); Yield: 96%; 94% ee;  $[\alpha]_{\text{D}}^{25} = +56.4$  (c = 2.0,  $\text{CH}_2\text{Cl}_2$ ); HPLC condition: Lux 5u Amylose-1 (250  $\times$  4.60 mm), ipa:hex = 15:85, 1.0 mL/min, 210 nm;  $t_{\text{R}} = 16.6$  min (major),  $t_{\text{R}} = 20.3$  min (minor);  $^1\text{H}$  NMR (600 MHz, Chloroform-*d*)  $\delta$  7.29 (t,  $J = 7.60$  Hz, 2H), 7.26 – 7.24 (m, 1H), 7.22 (t,  $J = 7.33$  Hz, 1H), 7.06 – 6.92 (m, 3H), 5.63 (s, 1H), 5.57 (dd,  $J = 5.53, 2.95$  Hz, 1H), 4.24 (s, 1H), 3.12 (dt,  $J = 8.62, 2.33$  Hz, 2H), 2.61 – 2.38 (m, 1H), 2.14 (dq,  $J = 13.54, 3.29$  Hz, 1H).  $^{13}\text{C}$  NMR (151 MHz, Chloroform-*d*)  $\delta$  146.9, 146.2, 142.3, 137.7, 128.6, 127.4, 127.3, 126.1, 124.1, 123.4, 83.6, 58.3, 35.8, 30.8. TOF-HRMS Calcd. for  $\text{C}_{16}\text{H}_{16}\text{N}_3\text{S}$  [ $\text{M}+\text{H}^+$ ]: 282.1059, found 282.1057.

2-(furan-2-yl)-7-phenyl-4,5,6,7-tetrahydropyrazolo[1,5-*a*]pyrimidine (**4o**)

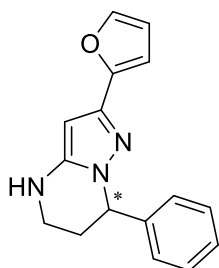

White solid; (PE/EA = 3/1); Yield: 96%; 95% ee;  $[\alpha]_{\text{D}}^{25} = +52.7$  ( $c = 1.0$ ,  $\text{CH}_2\text{Cl}_2$ ); HPLC condition: Lux 5u Amylose-1 (250 × 4.60 mm), ipa:hex = 30:70, 1.0 mL/min, 210 nm;  $t_{\text{R}} = 9.8$  min (major),  $t_{\text{R}} = 11.1$  min (minor);  $^1\text{H}$  NMR (600 MHz, Chloroform-*d*)  $\delta$  7.37 (s, 1H), 7.29 (t,  $J = 7.56$  Hz, 2H), 7.21 (t,  $J = 7.34$  Hz, 1H), 6.98 (d,  $J = 7.69$  Hz, 2H), 6.57 (d,  $J = 3.37$  Hz, 1H), 6.42 – 6.36 (m, 1H), 5.66 (s, 1H), 5.58 (dd,  $J = 5.70$ , 2.98 Hz, 1H), 4.16 (s, 1H), 3.17 (dd,  $J = 8.34$ , 3.26 Hz, 2H), 2.54 (dtd,  $J = 13.62$ , 7.96, 5.54 Hz, 1H), 2.16 (dq,  $J = 13.63$ , 3.32 Hz, 1H).  $^{13}\text{C}$  NMR (151 MHz, Chloroform-*d*)  $\delta$  149.6, 146.6, 143.5, 142.3, 141.5, 128.6, 127.4, 126.1, 111.2, 105.5, 83.3, 58.4, 35.9, 30.8. TOF-HRMS Calcd. for  $\text{C}_{16}\text{H}_{16}\text{N}_3\text{O}$   $[\text{M}+\text{H}^+]$ : 266.1288, found 266.1293.

7-phenyl-4,5,6,7-tetrahydropyrazolo[1,5-*a*]pyrimidine (**4p**)

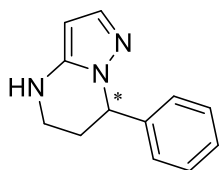

White solid; (PE/EA = 3/1); Yield: 90%; 90% ee;  $[\alpha]_{\text{D}}^{25} = +20.1$  ( $c = 1.0$ ,  $\text{CH}_2\text{Cl}_2$ ); HPLC condition: Lux 5u Amylose-1 (250 × 4.60 mm), ipa:hex = 30:70, 1.0 mL/min, 210 nm;  $t_{\text{R}} = 8.3$  min (major),  $t_{\text{R}} = 6.1$  min (minor);  $^1\text{H}$  NMR (600 MHz, Chloroform-*d*)  $\delta$  7.34 – 7.28 (m, 3H), 7.25 – 7.22 (m, 1H), 7.02 – 6.95 (m, 2H), 5.47 (t,  $J = 4.97$  Hz, 1H), 5.40 (d,  $J = 1.96$  Hz, 1H), 4.14 (s, 1H), 3.19 (dp,  $J = 7.15$ , 2.41 Hz, 2H), 2.55 – 2.44 (m, 1H), 2.22 – 2.09 (m, 1H).  $^{13}\text{C}$  NMR (151 MHz, Chloroform-*d*)  $\delta$  146.1, 142.4, 139.6, 128.7, 127.5, 126.2, 86.2, 58.7, 36.8, 31.4.

2-(*tert*-butyl)-7-phenyl-4,5,6,7-tetrahydropyrazolo[1,5-*a*]pyrimidine (**4q**)

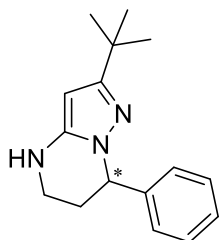

White solid; (PE/EA = 3/1); Yield: 95%; 95% ee;  $[\alpha]_{\text{D}}^{25} = +70.9$  ( $c = 1.0$ ,  $\text{CH}_2\text{Cl}_2$ ); HPLC condition: Lux 5u Amylose-1 (250 × 4.60 mm), ipa:hex = 10:90, 1.0 mL/min, 210 nm;  $t_{\text{R}} = 8.0$  min (major),  $t_{\text{R}} = 8.9$  min (minor);  $^1\text{H}$  NMR (600 MHz, Chloroform-*d*)  $\delta$  7.27 (t,  $J = 8.56$  Hz, 2H), 7.22 – 7.17 (m, 1H), 6.87 (d,  $J = 7.58$  Hz, 2H), 5.52 (d,  $J = 5.58$  Hz, 1H), 5.28 (d,  $J = 2.86$  Hz, 1H), 4.01 (s, 1H), 3.08 (d,  $J = 7.42$  Hz, 2H), 2.53 (dt,  $J = 10.64$ , 5.63 Hz, 1H), 2.11 (d,  $J = 13.47$  Hz, 1H), 1.24 (s, 9H).  $^{13}\text{C}$  NMR (151 MHz, Chloroform-*d*)  $\delta$  161.8, 146.0, 143.0, 128.3, 127.1, 126.1, 82.8, 57.8, 36.0, 32.2, 31.1,

30.6.

7-phenyl-4,5,6,7-tetrahydropyrazolo[1,5-*a*]pyrimidine-3-carbonitrile (**6a**)

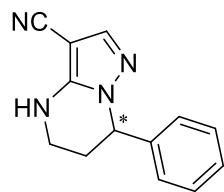

White solid; (PE/EA = 3/1); Yield: 95%; 94% ee;  $[\alpha]_{\text{D}}^{25} = -42.0$  ( $c = 1.0$ ,  $\text{CH}_2\text{Cl}_2$ ); SFC condition: Lux 5u Amylose-1 ( $250 \times 4.60$  mm), MeOH:CO<sub>2</sub> = 20:80, 3.0 mL/min, 210 nm;  $t_{\text{R}} = 8.7$  min (major),  $t_{\text{R}} = 6.3$  min (minor); <sup>1</sup>H NMR (600 MHz, Chloroform-*d*)  $\delta$  7.49 (d,  $J = 4.96$  Hz, 1H), 7.33 (t,  $J = 7.37$  Hz, 2H), 7.28 (dtd,  $J = 7.36, 5.18, 2.69$  Hz, 1H), 7.04 – 6.92 (m, 2H), 5.55 (s, 1H), 5.45 (t,  $J = 4.71$  Hz, 1H), 3.28 (dq,  $J = 12.08, 4.09$  Hz, 1H), 3.18 (dddd,  $J = 12.08, 10.57, 3.28, 1.35$  Hz, 1H), 2.57 – 2.33 (m, 1H), 2.17 (dq,  $J = 13.07, 4.15$  Hz, 1H). <sup>13</sup>C NMR (151 MHz, Chloroform-*d*)  $\delta$  150.3, 141.0, 140.4, 128.9, 128.1, 128.0, 126.0, 126.0, 115.0, 71.7, 58.5, 35.7, 29.9, 29.8.

7-(2-methoxyphenyl)-4,5,6,7-tetrahydropyrazolo[1,5-*a*]pyrimidine-3-carbonitrile (**6b**)

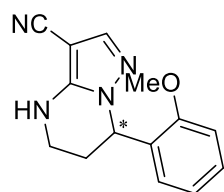

White solid; (PE/EA = 3/1); Yield: 95%; 92% ee;  $[\alpha]_{\text{D}}^{25} = -42.6$  ( $c = 1.0$ ,  $\text{CH}_2\text{Cl}_2$ ); HPLC condition: Lux 5u Amylose-1 ( $250 \times 4.60$  mm), ipa:hex = 30:70, 1.0 mL/min, 210 nm;  $t_{\text{R}} = 6.9$  min (major),  $t_{\text{R}} = 5.3$  min (minor); <sup>1</sup>H NMR (400 MHz, Chloroform-*d*)  $\delta$  7.49 (s, 1H), 7.30 – 7.22 (m, 1H), 6.95 – 6.79 (m, 2H), 6.45 (dd,  $J = 7.55, 1.68$  Hz, 1H), 5.80 (dd,  $J = 5.49, 3.07$  Hz, 1H), 4.97 (s, 1H), 3.85 (s, 3H), 3.30 (dt,  $J = 11.88, 4.11$  Hz, 1H), 3.20 (td,  $J = 11.61, 3.28$  Hz, 1H), 2.47 – 2.31 (m, 1H), 2.27 (dq,  $J = 13.97, 3.48$  Hz, 1H). <sup>13</sup>C NMR (101 MHz, Chloroform-*d*)  $\delta$  155.5, 150.4, 140.8, 129.1, 128.3, 126.9, 120.7, 114.8, 110.7, 71.8, 55.4, 54.0, 36.0, 27.2.

7-(*m*-tolyl)-4,5,6,7-tetrahydropyrazolo[1,5-*a*]pyrimidine-3-carbonitrile (**6c**)

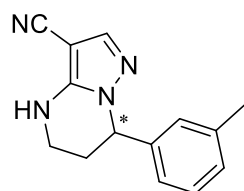

White solid; (PE/EA = 3/1); Yield: 94%; 93% ee;  $[\alpha]_{\text{D}}^{25} = -40.0$  ( $c = 1.0$ ,  $\text{CH}_2\text{Cl}_2$ ); SFC condition: Lux 5u Amylose-1 ( $250 \times 4.60$  mm), MeOH:CO<sub>2</sub>=20:80, 3.0 mL/min, 210 nm;  $t_{\text{R}} = 5.1$  min (major),  $t_{\text{R}} = 4.7$  min (minor); <sup>1</sup>H NMR (600 MHz, Chloroform-*d*)  $\delta$  7.49 (d,  $J = 0.99$  Hz, 1H), 7.22 (td,  $J = 7.41, 1.04$  Hz, 1H), 7.14 – 7.03 (m, 1H), 6.83 – 6.73 (m, 2H), 5.41 (t,  $J = 4.77$  Hz, 1H), 5.05 (s, 1H), 3.34 (dq,  $J = 12.12, 4.11$  Hz, 1H), 3.27 (tdd,  $J = 11.92, 3.25, 1.36$  Hz, 1H), 2.45 (dddd,  $J = 14.24, 9.98, 5.43, 4.15$  Hz, 1H), 2.32 (s, 3H), 2.20 (dq,  $J = 13.20, 4.13$  Hz, 1H). <sup>13</sup>C NMR (151 MHz,

Chloroform-*d*)  $\delta$  150.1, 140.9, 140.3, 138.7, 128.9, 128.9, 126.7, 123.1, 114.8, 72.0, 58.6, 36.1, 30.0, 21.6.

7-(3-methoxyphenyl)-4,5,6,7-tetrahydropyrazolo[1,5-*a*]pyrimidine-3-carbonitrile (**6d**)

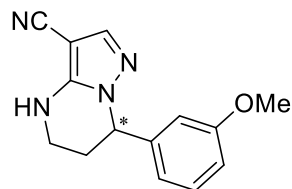

White solid; (PE/EA = 3/1); Yield: 96%; 92% ee;  $[\alpha]_{\text{D}}^{25} = -27.5$  ( $c = 1.0$ ,  $\text{CH}_2\text{Cl}_2$ ); HPLC condition: Lux 5u Amylose-1 ( $250 \times 4.60$  mm), ipa:hex = 20:80, 1.0 mL/min, 254 nm;  $t_{\text{R}} = 21.7$  min (major),  $t_{\text{R}} = 13.3$  min (minor);  $^1\text{H}$  NMR (400 MHz, Chloroform-*d*)  $\delta$  7.48 (s, 1H), 7.31 – 7.19 (m, 1H), 6.81 (ddd,  $J = 8.35, 2.57, 0.97$  Hz, 1H), 6.61 – 6.53 (m, 1H), 6.50 (t,  $J = 2.18$  Hz, 1H), 5.42 (t,  $J = 4.59$  Hz, 1H), 5.38 (s, 1H), 3.76 (s, 3H), 3.37 – 3.12 (m, 2H), 2.52 – 2.34 (m, 1H), 2.32 – 2.09 (m, 1H).  $^{13}\text{C}$  NMR (101 MHz, Chloroform-*d*)  $\delta$  160.0, 150.1, 142.0, 140.9, 130.0, 118.2, 114.9, 112.9, 112.3, 71.7, 58.4, 55.3, 35.8, 29.7.

7-(*p*-tolyl)-4,5,6,7-tetrahydropyrazolo[1,5-*a*]pyrimidine-3-carbonitrile (**6e**)

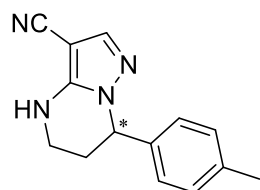

White solid; (PE/EA = 3/1); Yield: 94%; 95% ee;  $[\alpha]_{\text{D}}^{25} = -81.9$  ( $c = 1.0$ ,  $\text{CH}_2\text{Cl}_2$ ); SFC condition: Lux 5u Amylose-1 ( $250 \times 4.60$  mm), MeOH:CO<sub>2</sub> = 20:80, 3.0 mL/min, 210 nm;  $t_{\text{R}} = 10.0$  min (major),  $t_{\text{R}} = 8.0$  min (minor);  $^1\text{H}$  NMR (600 MHz, Chloroform-*d*)  $\delta$  7.48 (d,  $J = 1.61$  Hz, 1H), 7.19 – 7.10 (m, 2H), 6.88 (d,  $J = 7.80$  Hz, 2H), 5.46 – 5.15 (m, 2H), 3.36 – 3.28 (m, 1H), 3.28 – 3.19 (m, 1H), 2.43 (ddd,  $J = 14.35, 9.54, 5.08$  Hz, 1H), 2.31 (s, 3H), 2.17 (ddd,  $J = 12.16, 8.58, 4.27$  Hz, 1H).  $^{13}\text{C}$  NMR (151 MHz, Chloroform-*d*)  $\delta$  150.2, 150.2, 140.9, 137.9, 137.9, 137.4, 137.4, 129.6, 126.0, 115.1, 71.7, 58.5, 36.1, 36.0, 30.0, 21.1. TOF-HRMS Calcd. for  $\text{C}_{14}\text{H}_{15}\text{N}_4$  [ $\text{M}+\text{H}^+$ ]: 239.1291, found 239.1295.

7-(4-(*tert*-butyl)phenyl)-4,5,6,7-tetrahydropyrazolo[1,5-*a*]pyrimidine-3-carbonitrile (**6f**)

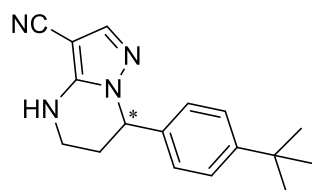

White solid; (PE/EA = 3/1); Yield: 94%; 94% ee;  $[\alpha]_{\text{D}}^{25} = -63.0$  ( $c = 1.0$ ,  $\text{CH}_2\text{Cl}_2$ ); SFC condition: Lux 5u Amylose-1 ( $250 \times 4.60$  mm), MeOH:CO<sub>2</sub> = 30:70, 3.0 mL/min, 210 nm;  $t_{\text{R}} = 5.9$  min (major),  $t_{\text{R}} = 2.9$  min (minor);  $^1\text{H}$  NMR (600 MHz, Chloroform-*d*)  $\delta$  7.49 (s, 1H), 7.35 (d,  $J = 8.38$  Hz, 2H), 6.96 – 6.86 (m, 2H),

5.42 (t,  $J = 4.74$  Hz, 1H), 5.16 (s, 1H), 3.41 – 3.07 (m, 2H), 2.44 (dddd,  $J = 14.08, 9.87, 5.36, 4.20$  Hz, 1H), 2.31 – 2.08 (m, 1H), 1.28 (s, 9H).  $^{13}\text{C}$  NMR (151 MHz, Chloroform-*d*)  $\delta$  151.0, 150.1, 140.8, 137.2, 125.8, 125.6, 114.8, 71.9, 58.4, 36.0, 34.6, 31.3, 29.9.

7-(3-chlorophenyl)-4,5,6,7-tetrahydropyrazolo[1,5-*a*]pyrimidine-3-carbonitrile (**6g**)

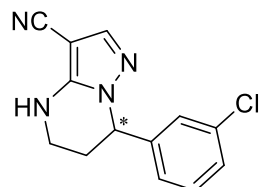

White solid; (PE/EA = 3/1); Yield: 97%; 97% ee;  $[\alpha]_{\text{D}}^{25} = -59.8$  ( $c = 1.0, \text{CH}_2\text{Cl}_2$ ); SFC condition: Lux 5u Amylose-1 (250  $\times$  4.60 mm), MeOH:CO<sub>2</sub> = 20:80, 3.0 mL/min, 210 nm;  $t_{\text{R}} = 10.4$  min (major),  $t_{\text{R}} = 7.1$  min (minor);  $^1\text{H}$  NMR (400 MHz, Chloroform-*d*)  $\delta$  7.50 (s, 1H), 7.31 – 7.25 (m, 2H), 6.98 (q,  $J = 1.44$  Hz, 1H), 6.90 – 6.81 (m, 1H), 5.43 (t,  $J = 4.72$  Hz, 1H), 5.35 – 5.18 (m, 1H), 3.42 – 3.30 (m, 1H), 3.22 (dddd,  $J = 12.12, 10.52, 3.25, 1.48$  Hz, 1H), 2.47 (dddd,  $J = 14.56, 10.59, 5.46, 4.09$  Hz, 1H), 2.30 – 2.07 (m, 1H).  $^{13}\text{C}$  NMR (101 MHz, Chloroform-*d*)  $\delta$  150.1, 142.4, 141.2, 135.0, 130.3, 128.4, 126.3, 124.2, 114.7, 72.0, 58.0, 35.9, 29.7.

7-(3-fluorophenyl)-4,5,6,7-tetrahydropyrazolo[1,5-*a*]pyrimidine-3-carbonitrile (**6h**)

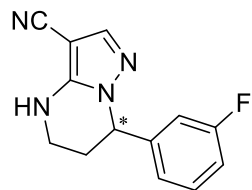

White solid; (PE/EA = 3/1); Yield: 96%; 96% ee;  $[\alpha]_{\text{D}}^{25} = -45.6$  ( $c = 1.0, \text{CH}_2\text{Cl}_2$ ); SFC condition: Lux 5u Amylose-1 (250  $\times$  4.60 mm), MeOH:CO<sub>2</sub> = 20:80, 3.0 mL/min, 210 nm;  $t_{\text{R}} = 6.8$  min (major),  $t_{\text{R}} = 5.5$  min (minor);  $^1\text{H}$  NMR (600 MHz, Chloroform-*d*)  $\delta$  7.50 (d,  $J = 1.36$  Hz, 1H), 7.31 (tdd,  $J = 7.54, 5.79, 1.33$  Hz, 1H), 7.06 – 6.90 (m, 1H), 6.78 (dd,  $J = 7.79, 1.59$  Hz, 1H), 6.68 (dt,  $J = 9.66, 2.10$  Hz, 1H), 5.55 – 5.34 (m, 2H), 3.34 (dp,  $J = 11.05, 3.50$  Hz, 1H), 3.21 (tt,  $J = 11.54, 3.27$  Hz, 1H), 2.60 – 2.37 (m, 1H), 2.19 (dt,  $J = 11.44, 4.13$  Hz, 1H).  $^{13}\text{C}$  NMR (151 MHz, Chloroform-*d*)  $\delta$  163.9, 162.3, 150.1, 142.9 (d,  $J = 6.7$  Hz), 141.1, 130.6 (d,  $J = 8.3$  Hz), 121.6 (d,  $J = 2.9$  Hz), 115.1 (d,  $J = 20.9$  Hz), 113.2 (d,  $J = 22.5$  Hz), 71.9, 58.0, 35.8, 29.7.

7-(4-fluorophenyl)-4,5,6,7-tetrahydropyrazolo[1,5-*a*]pyrimidine-3-carbonitrile (**6i**)

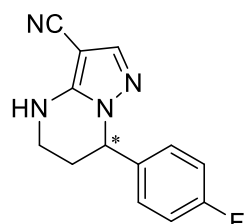

White solid; (PE/EA = 3/1); Yield: 97%; 97% ee;  $[\alpha]_{\text{D}}^{25} = -35.4$  ( $c = 1.0, \text{CH}_2\text{Cl}_2$ ); SFC condition: Lux 5u Amylose-1 (250  $\times$  4.60 mm), MeOH:CO<sub>2</sub> = 30:70, 3.0 mL/min, 210 nm;  $t_{\text{R}} = 6.4$  min (major),  $t_{\text{R}} = 5.2$  min (minor);  $^1\text{H}$  NMR (600 MHz, Chloroform-*d*)  $\delta$  7.49 (d,  $J = 1.96$  Hz, 1H), 7.04 (td,  $J = 8.58, 1.82$  Hz, 2H), 7.00 – 6.92 (m, 2H),

5.43 (t,  $J = 4.72$  Hz, 1H), 5.18 (d,  $J = 93.21$  Hz, 1H), 3.36 (dtd,  $J = 15.07, 7.35, 6.27, 3.55$  Hz, 1H), 3.25 (dddd,  $J = 11.58, 9.86, 8.22, 3.13, 1.43$  Hz, 1H), 2.46 (dddd,  $J = 15.99, 7.41, 5.84, 2.92$  Hz, 1H), 2.26 – 2.11 (m, 1H).  $^{13}\text{C}$  NMR (151 MHz, Chloroform-*d*)  $\delta$  163.3, 161.6, 150.1, 141.0, 136.0, 127.8, 127.7, 116.0, 115.8, 71.8, 58.0, 36.0, 30.0.

7-(4-bromophenyl)-4,5,6,7-tetrahydropyrazolo[1,5-*a*]pyrimidine-3-carbonitrile (**6j**)

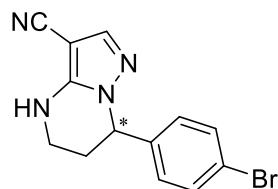

White solid; (PE/EA = 3/1); Yield: 95%; 98% ee;  $[\alpha]_{\text{D}}^{25} = -48.7$  ( $c = 1.0, \text{CH}_2\text{Cl}_2$ ); SFC condition: Lux 5u Amylose-1 (250  $\times$  4.60 mm), MeOH:CO<sub>2</sub> =20:80, 3.0 mL/min, 210 nm;  $t_{\text{R}} = 15.3$  min (major),  $t_{\text{R}} = 14.4$  min (minor);  $^1\text{H}$  NMR (600 MHz, Chloroform-*d*)  $\delta$  7.59 – 7.37 (m, 3H), 6.96 – 6.77 (m, 2H), 5.40 (t,  $J = 4.87$  Hz, 1H), 5.32 (s, 1H), 3.35 (ddd,  $J = 12.33, 5.85, 3.62$  Hz, 1H), 3.22 (dddd,  $J = 11.98, 10.26, 3.21, 1.47$  Hz, 1H), 2.53 – 2.39 (m, 1H), 2.16 (dq,  $J = 13.66, 4.39$  Hz, 1H).  $^{13}\text{C}$  NMR (101 MHz, Chloroform-*d*)  $\delta$  150.1, 141.1, 139.3, 132.1, 127.8, 122.1, 114.7, 72.0, 58.1, 35.9, 29.8.

7-(pyridin-2-yl)-4,5,6,7-tetrahydropyrazolo[1,5-*a*]pyrimidine-3-carbonitrile (**6k**)

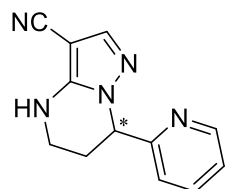

White solid; (PE/EA = 3/1); Yield: 91%; 92% ee;  $[\alpha]_{\text{D}}^{25} = -63.4$  ( $c = 1.0, \text{CH}_2\text{Cl}_2$ ); SFC condition: Lux 5u Amylose-1 (250  $\times$  4.60 mm), MeOH:CO<sub>2</sub> =20:80, 3.0 mL/min, 210 nm;  $t_{\text{R}} = 8.6$  min (major),  $t_{\text{R}} = 13.4$  min (minor);  $^1\text{H}$  NMR (600 MHz, Chloroform-*d*)  $\delta$  8.57 (d,  $J = 4.79$  Hz, 1H), 7.65 (tt,  $J = 7.76, 1.65$  Hz, 1H), 7.51 (d,  $J = 1.34$  Hz, 1H), 7.23 – 7.15 (m, 1H), 6.86 (d,  $J = 7.84$  Hz, 1H), 5.51 (t,  $J = 4.46$  Hz, 1H), 5.41 (s, 1H), 3.33 (dq,  $J = 12.25, 4.07$  Hz, 1H), 3.26 – 3.11 (m, 1H), 2.55 (dt,  $J = 11.48, 3.62$  Hz, 1H), 2.43 (ddt,  $J = 14.55, 12.51, 4.96$  Hz, 1H).  $^{13}\text{C}$  NMR (151 MHz, Chloroform-*d*)  $\delta$  159.0, 150.1, 149.7, 141.1, 137.1, 122.9, 121.2, 114.9, 71.9, 59.4, 36.0, 27.4.

2,7-diphenyl-4,5,6,7-tetrahydropyrazolo[1,5-*a*]pyrimidine-3-carbonitrile (**6l**)

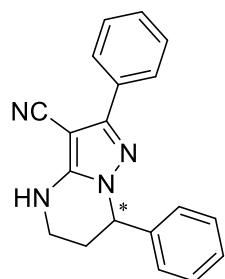

White solid; (PE/EA = 3/1); Yield: 96%; 97% ee;  $[\alpha]_{\text{D}}^{25} = 42.0$  ( $c = 1.0, \text{CH}_2\text{Cl}_2$ ); SFC condition: Lux 5u Amylose-1 (250  $\times$  4.60 mm), MeOH:CO<sub>2</sub> =20:80, 3.0 mL/min, 210 nm;  $t_{\text{R}} = 11.9$  min (major),  $t_{\text{R}} = 11.0$  min (minor);  $^1\text{H}$  NMR (600 MHz, Chloroform-*d*)  $\delta$  7.93 – 7.84 (m, 2H), 7.41 – 7.36 (m, 2H), 7.36 – 7.32 (m, 3H), 7.30 – 7.26

(m, 1H), 7.02 (dd,  $J = 7.94, 1.32$  Hz, 2H), 5.56 (dd,  $J = 5.43, 3.09$  Hz, 1H), 5.17 – 4.99 (m, 1H), 3.35 (dq,  $J = 11.79, 3.89$  Hz, 1H), 3.22 (tdd,  $J = 11.85, 3.10, 1.21$  Hz, 1H), 2.52 (dddd,  $J = 13.75, 11.68, 5.41, 4.21$  Hz, 1H), 2.27 – 2.14 (m, 1H).  $^{13}\text{C}$  NMR (151 MHz, Chloroform-*d*)  $\delta$  151.5, 151.2, 140.6, 131.5, 129.1, 128.9, 128.7, 128.0, 126.5, 125.9, 115.8, 69.8, 58.3, 35.5, 29.8.

7-phenyl-4,5,6,7-tetrahydropyrazolo[1,5-a]pyrimidine (**6m**)

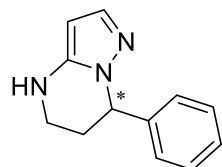

White solid; (PE/EA = 3/1); Yield: 63%; 94% ee;  $[\alpha]_{\text{D}}^{25} = +20.1$  ( $c = 1.0, \text{CH}_2\text{Cl}_2$ ); HPLC condition: Lux 5u Amylose-1 (250  $\times$  4.60 mm), ipa:hex = 30:70, 1.0 mL/min, 210 nm;  $t_{\text{R}} = 8.3$  min (major),  $t_{\text{R}} = 6.1$  min (minor);  $^1\text{H}$  NMR (600 MHz, Chloroform-*d*)  $\delta$  7.34 – 7.28 (m, 3H), 7.25 – 7.22 (m, 1H), 7.02 – 6.95 (m, 2H), 5.47 (t,  $J = 4.97$  Hz, 1H), 5.40 (d,  $J = 1.96$  Hz, 1H), 4.14 (s, 1H), 3.19 (dp,  $J = 7.15, 2.41$  Hz, 2H), 2.55 – 2.44 (m, 1H), 2.22 – 2.09 (m, 1H).  $^{13}\text{C}$  NMR (151 MHz, Chloroform-*d*)  $\delta$  146.1, 142.4, 139.6, 128.7, 127.5, 126.2, 86.2, 58.7, 36.8, 31.4.



## 8. NMR, SFC and HPLC spectra of compounds

### 7-phenylpyrazolo[1,5-a]pyrimidine-3-carbonitrile (**1a**)

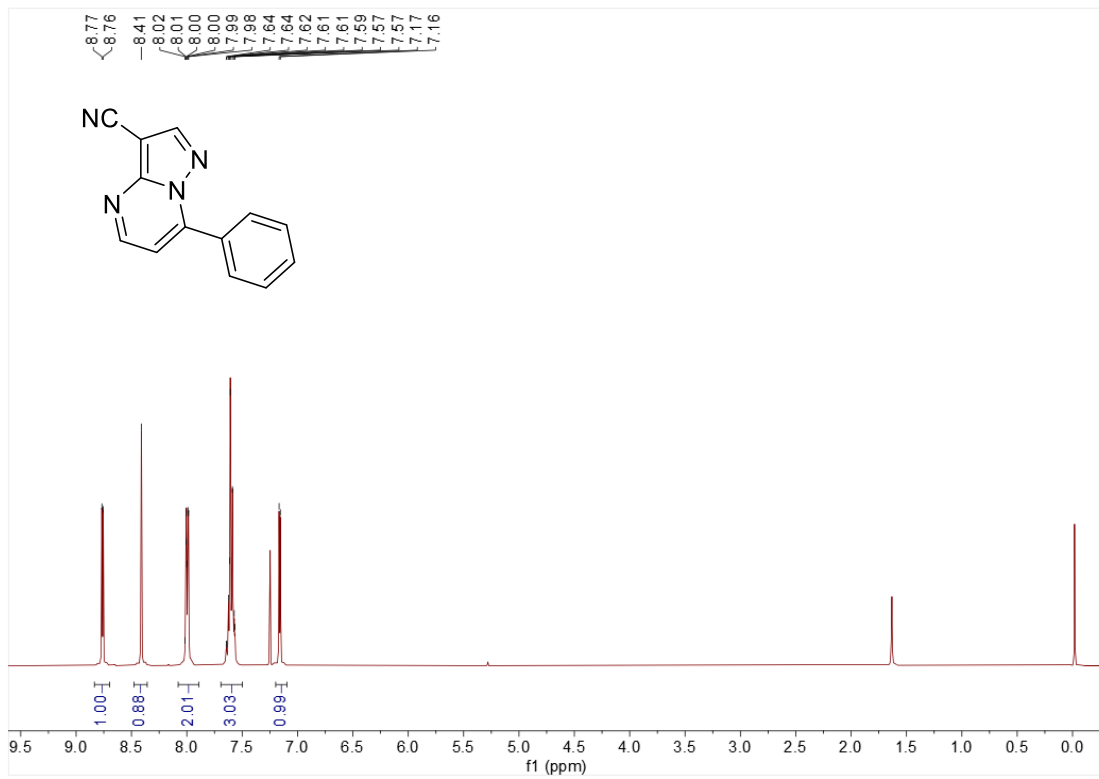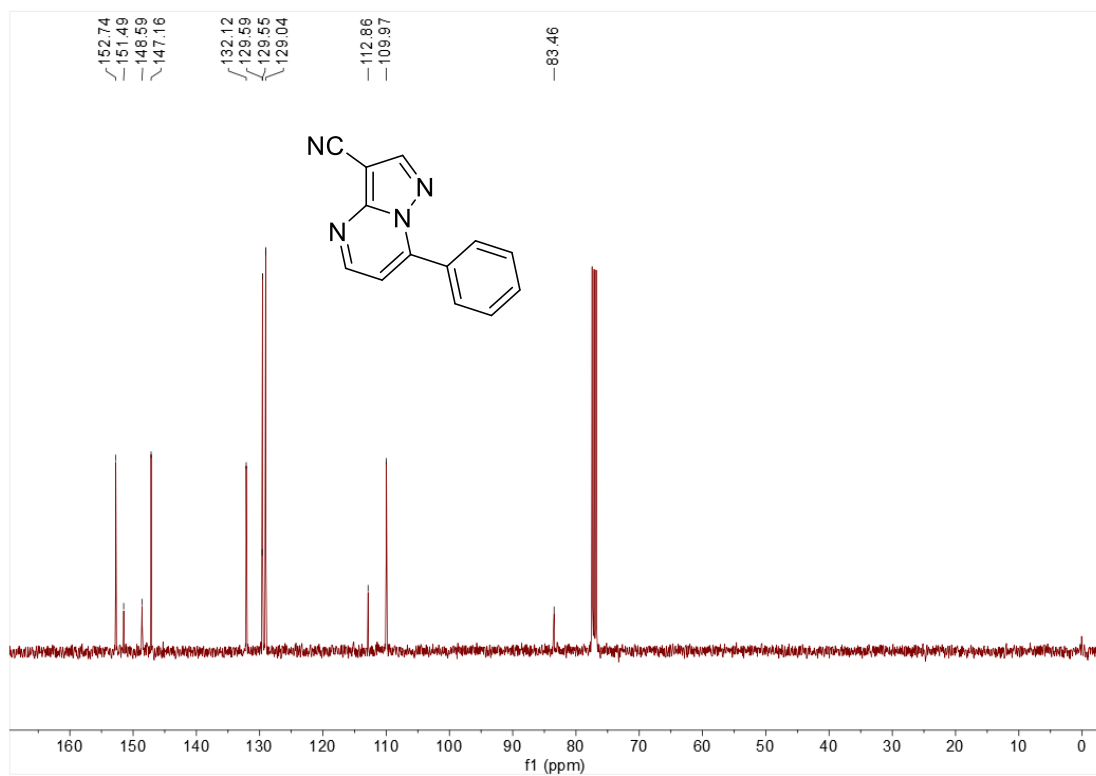

7-(*m*-tolyl)pyrazolo[1,5-*a*]pyrimidine-3-carbonitrile (**1b**)

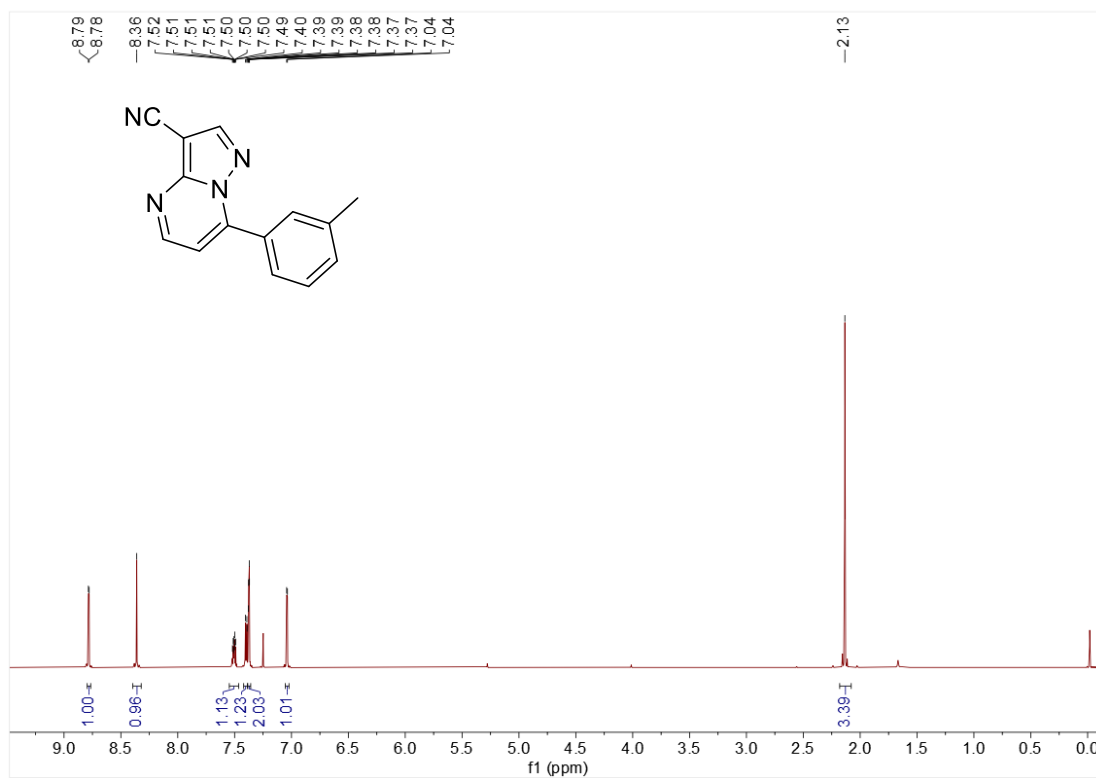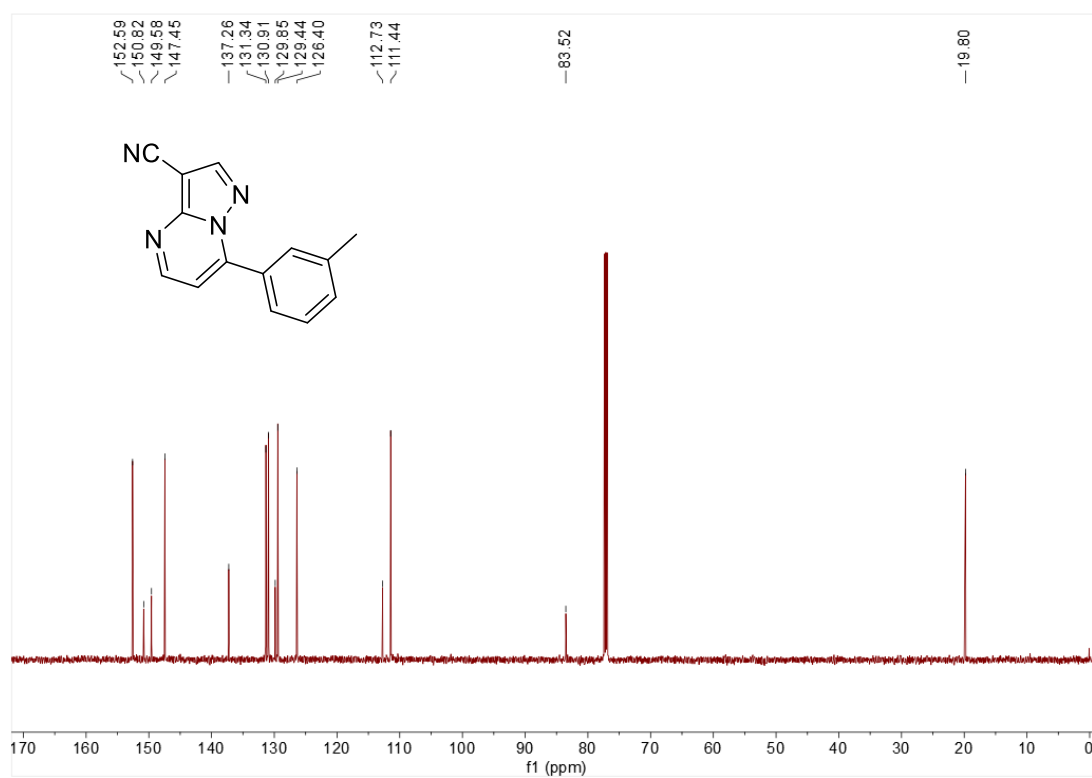

7-(3-methoxyphenyl)pyrazolo[1,5-*a*]pyrimidine-3-carbonitrile (**1c**)

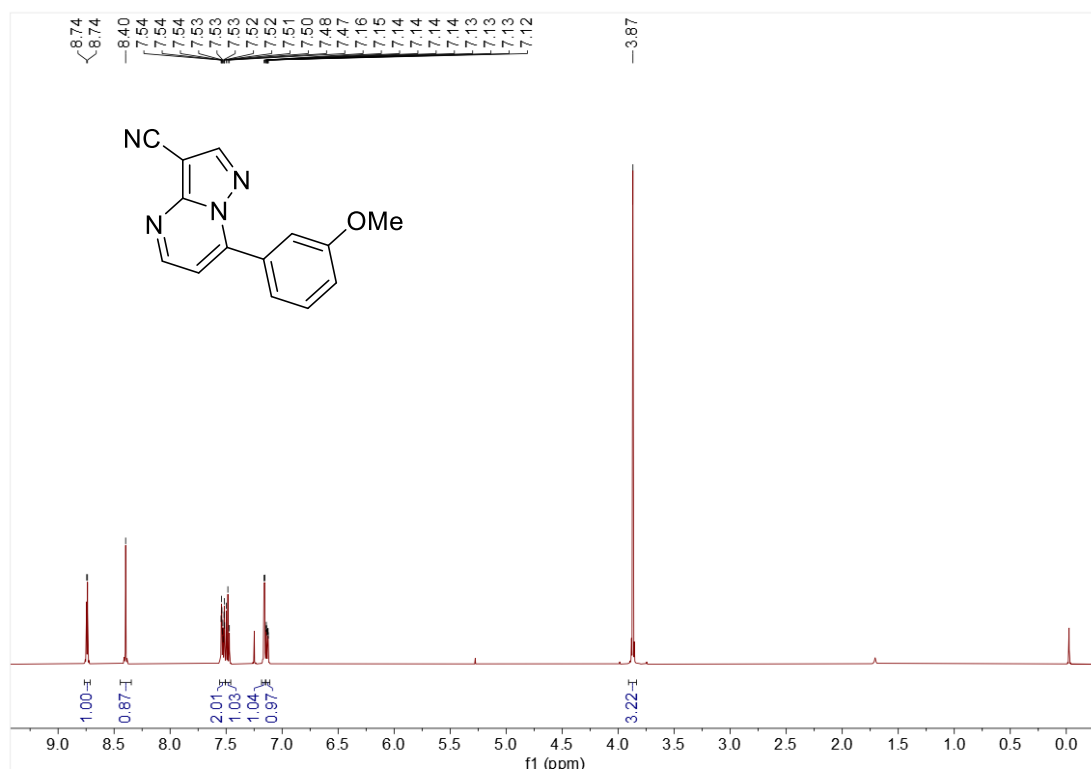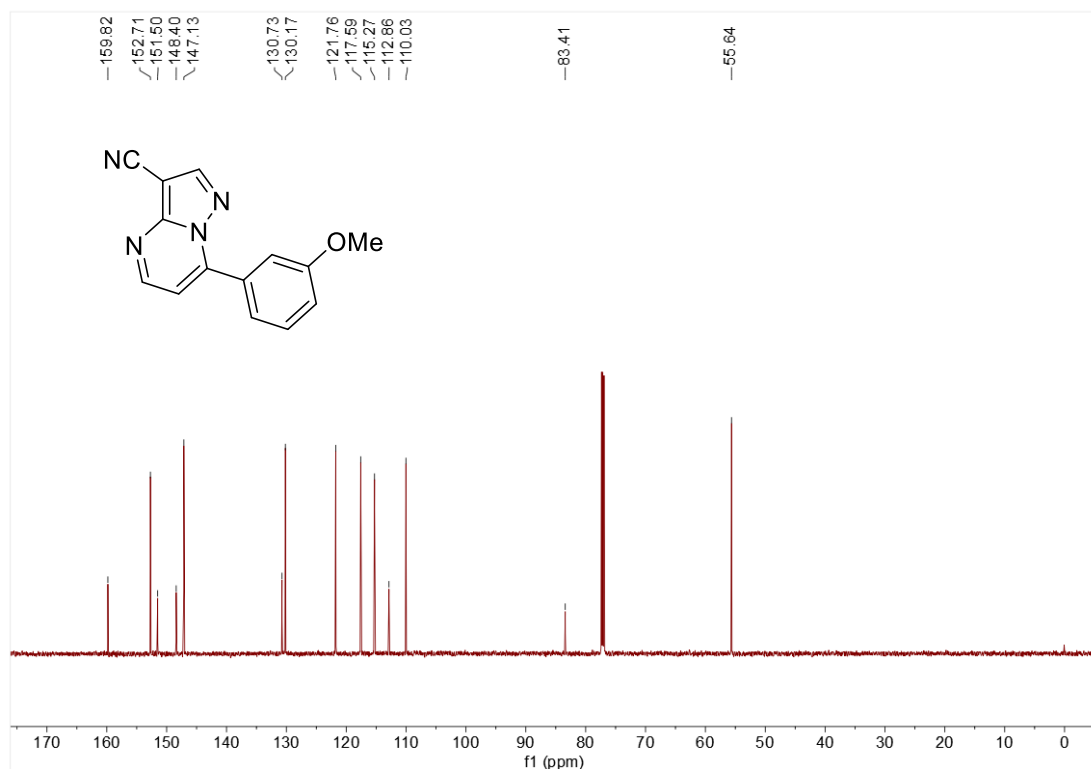

7-(4-(tert-butyl)phenyl)pyrazolo[1,5-a]pyrimidine-3-carbonitrile (**1d**)

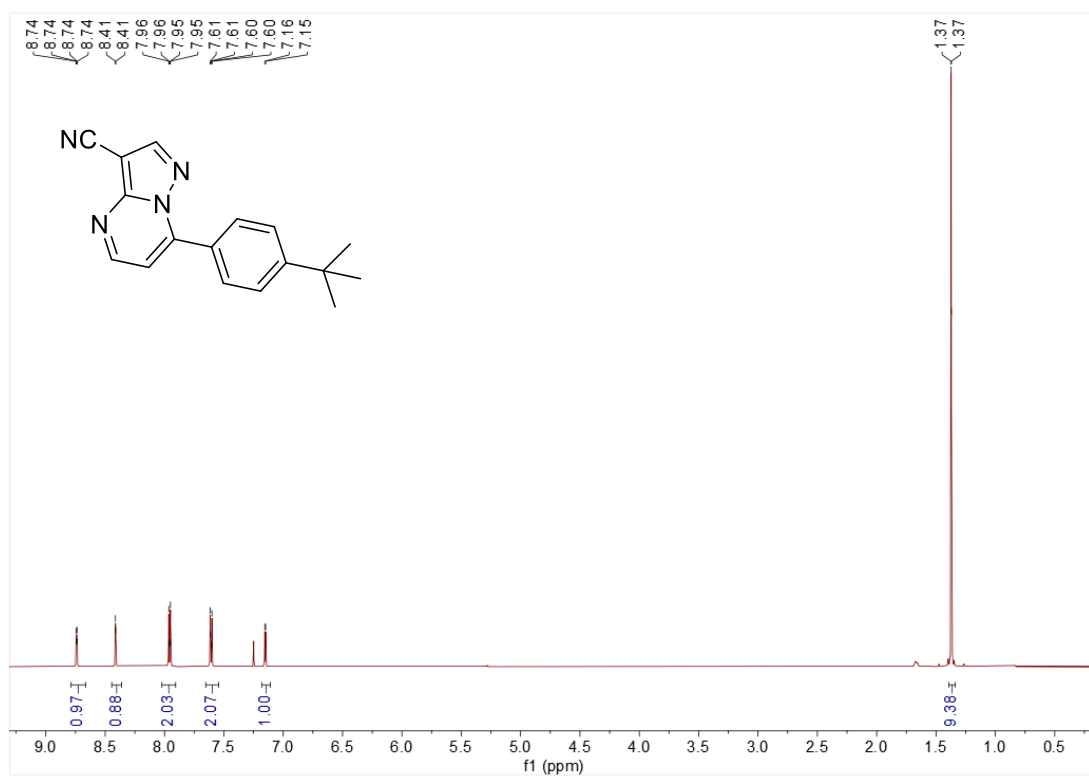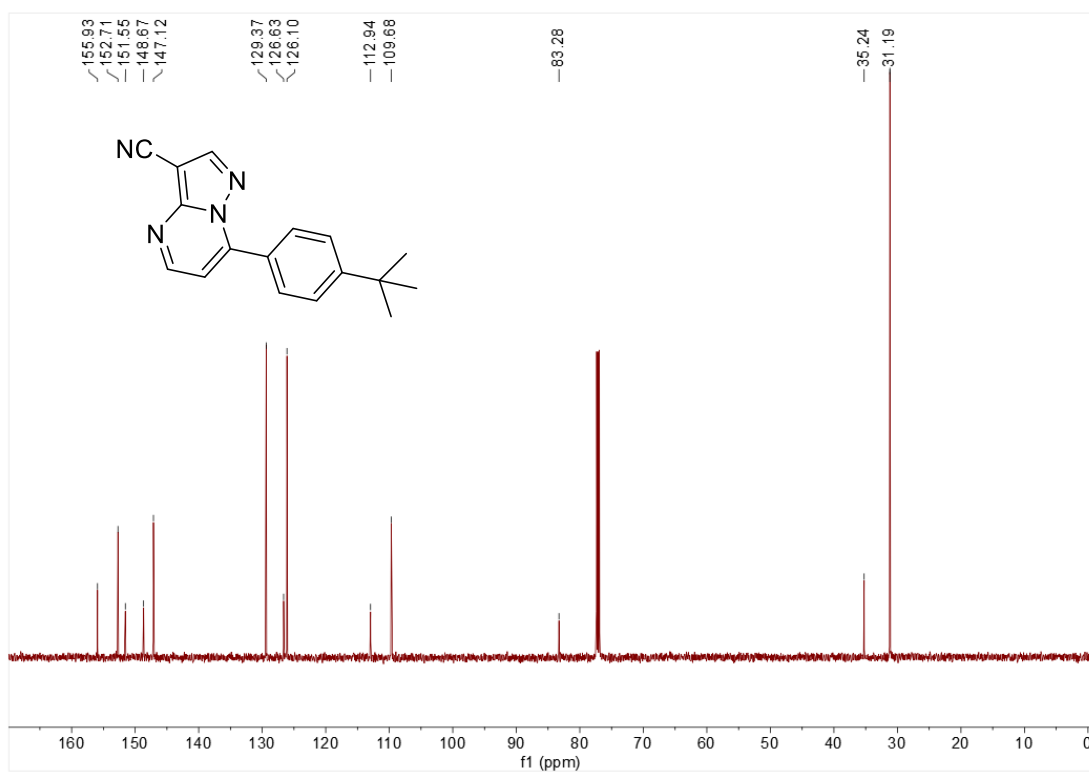

7-(3-chlorophenyl)pyrazolo[1,5-a]pyrimidine-3-carbonitrile (**1e**)

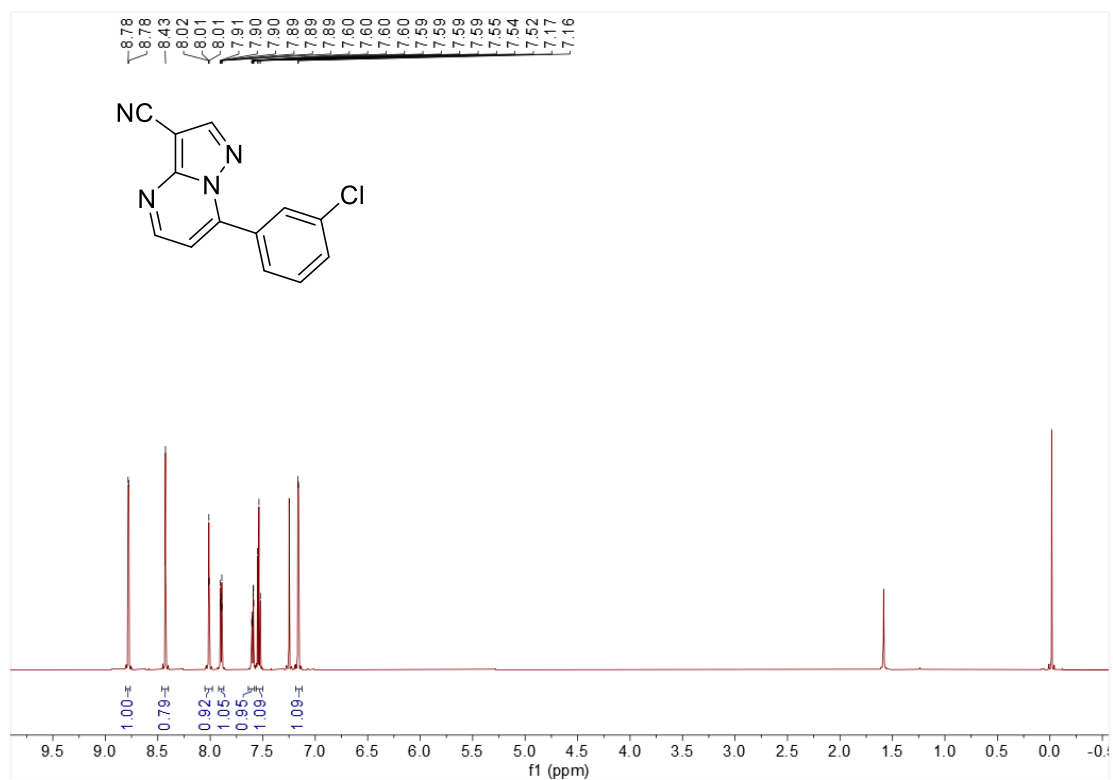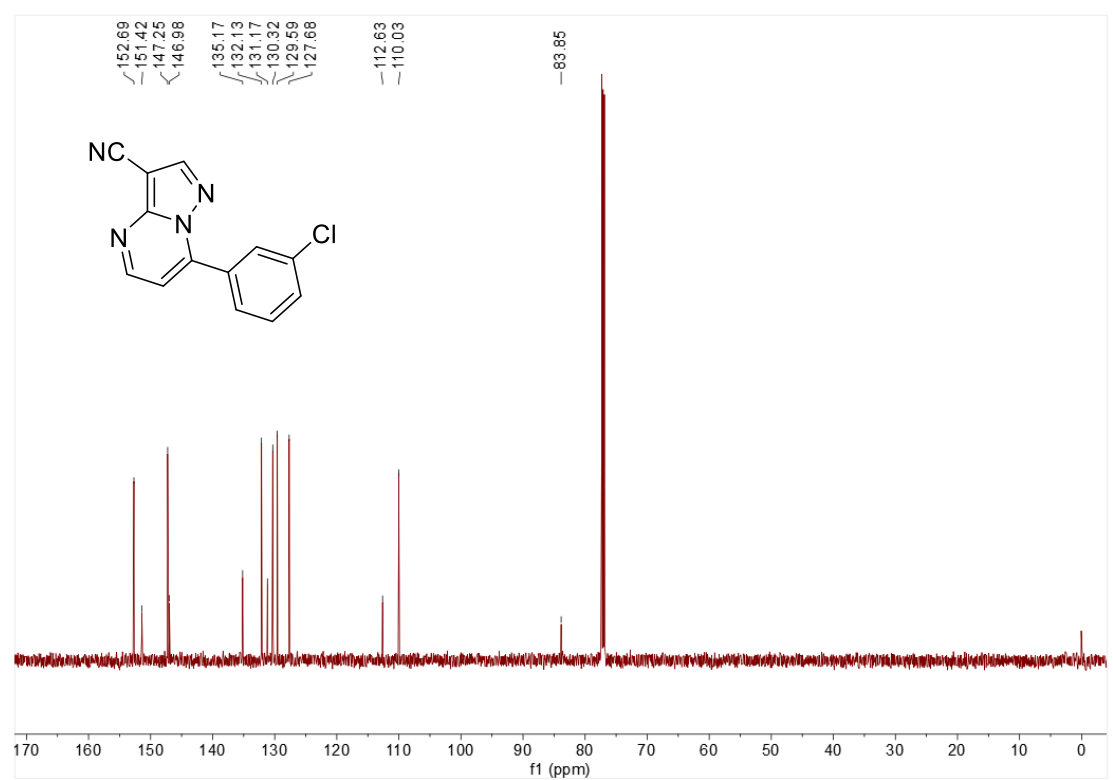

# 7-(3-fluorophenyl)pyrazolo[1,5-a]pyrimidine-3-carbonitrile (**1f**)

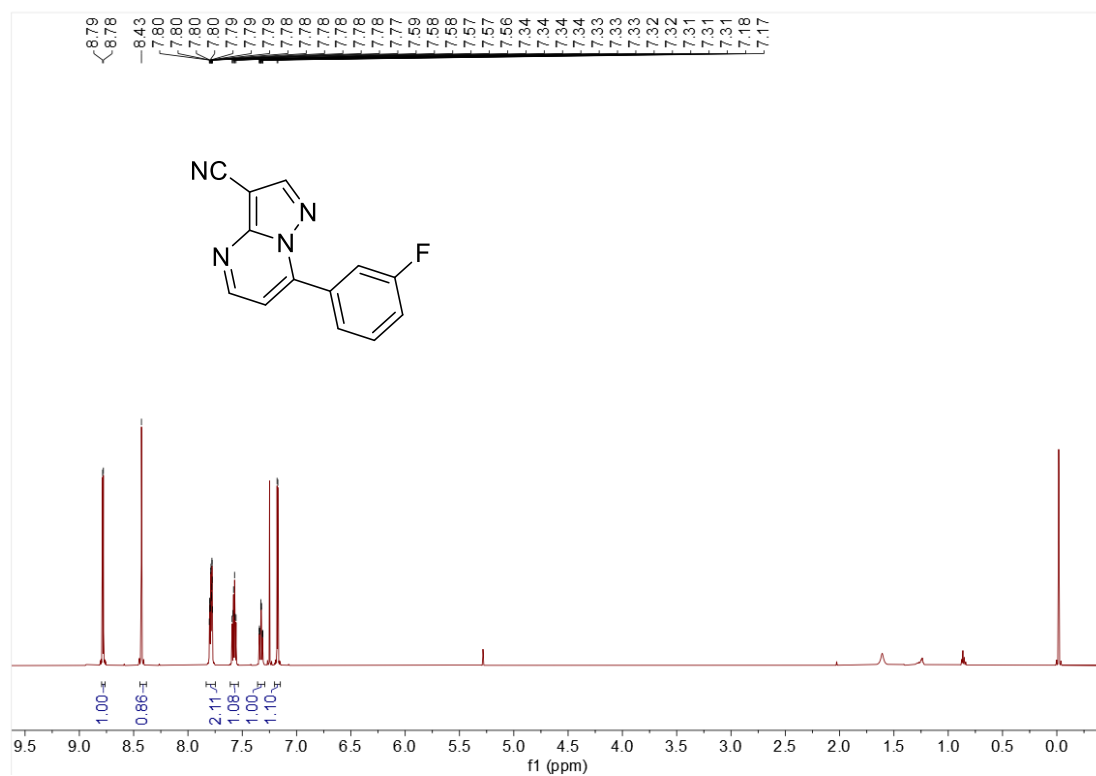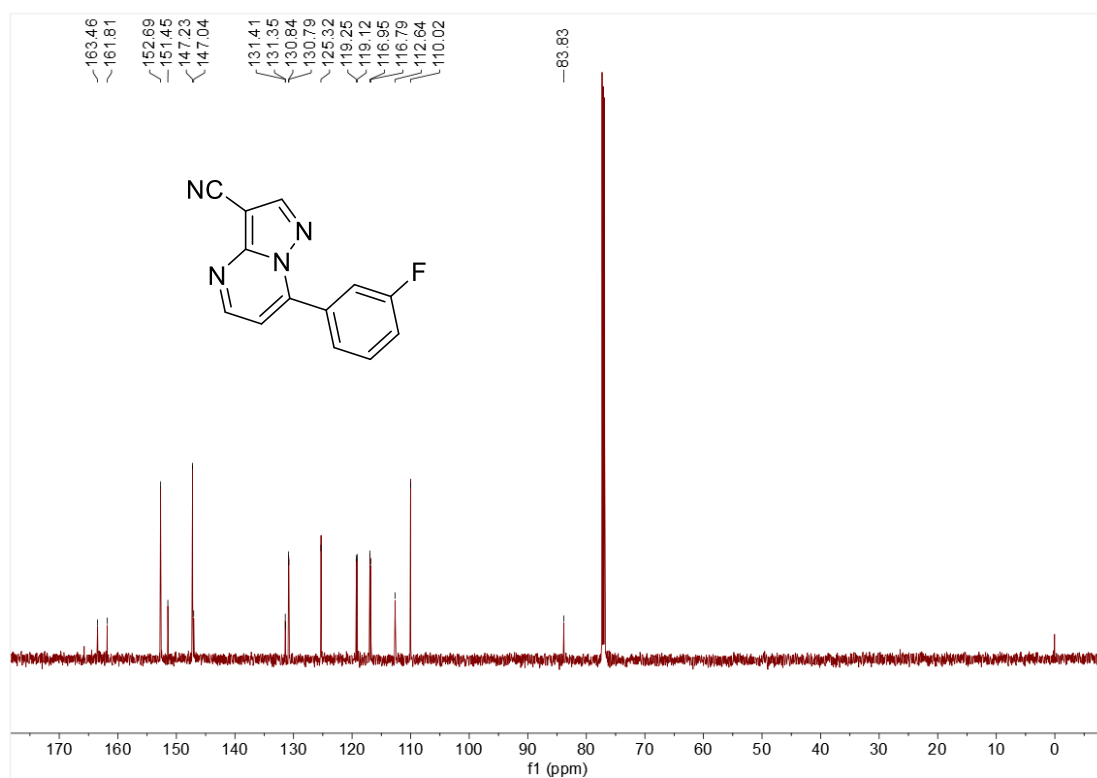

7-(3-bromophenyl)pyrazolo[1,5-a]pyrimidine-3-carbonitrile (**1g**)

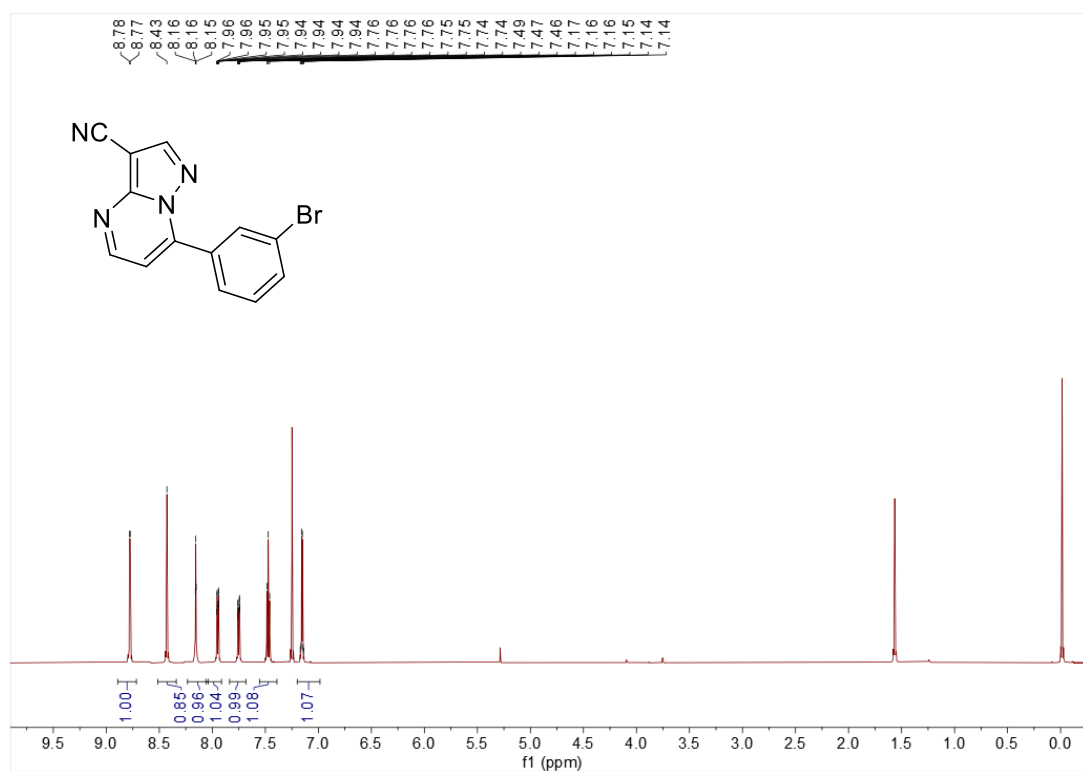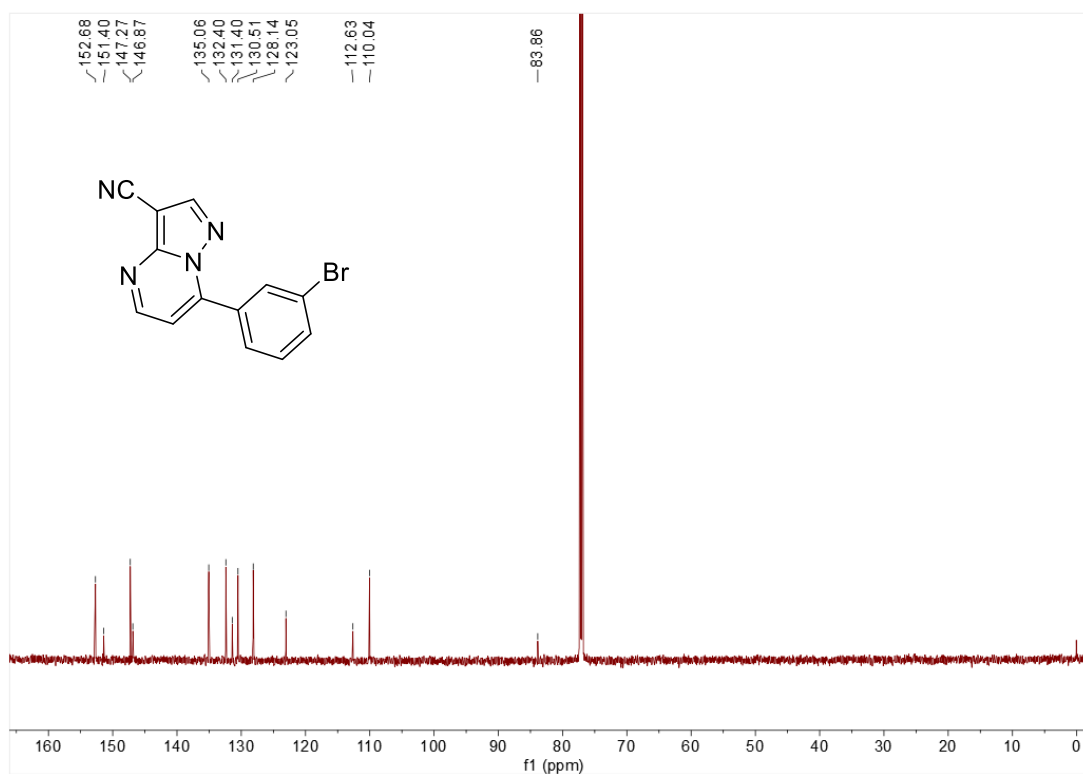

7-(2-fluorophenyl)pyrazolo[1,5-a]pyrimidine-3-carbonitrile (**1h**)

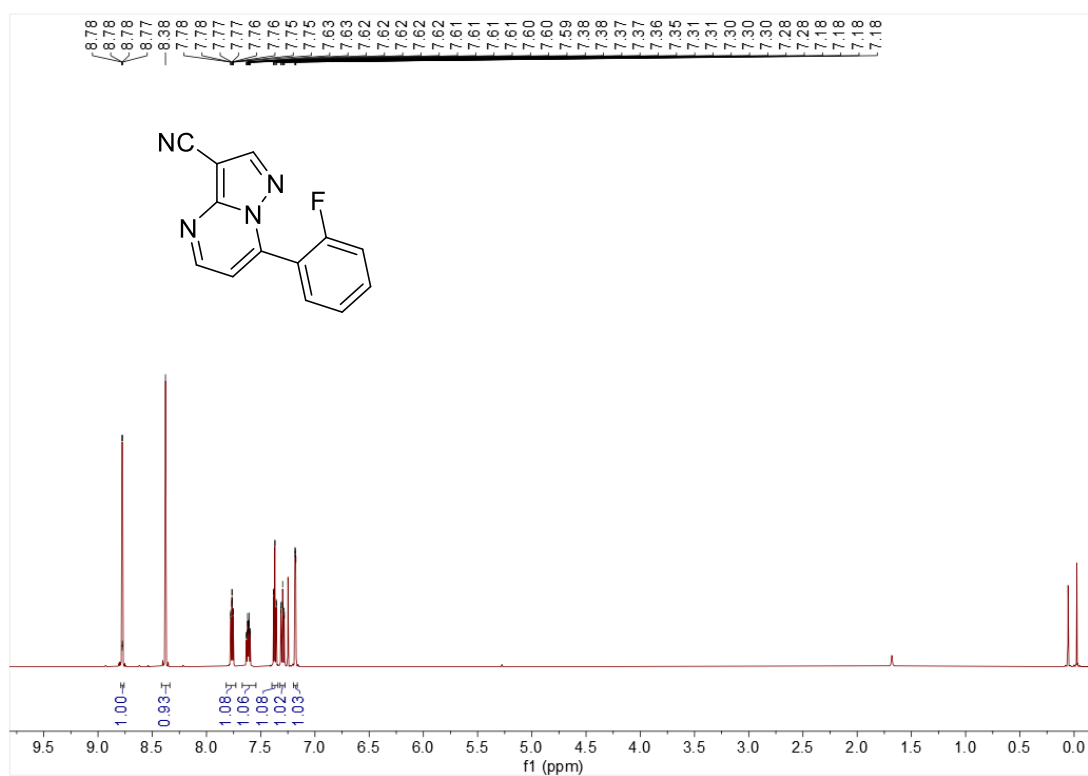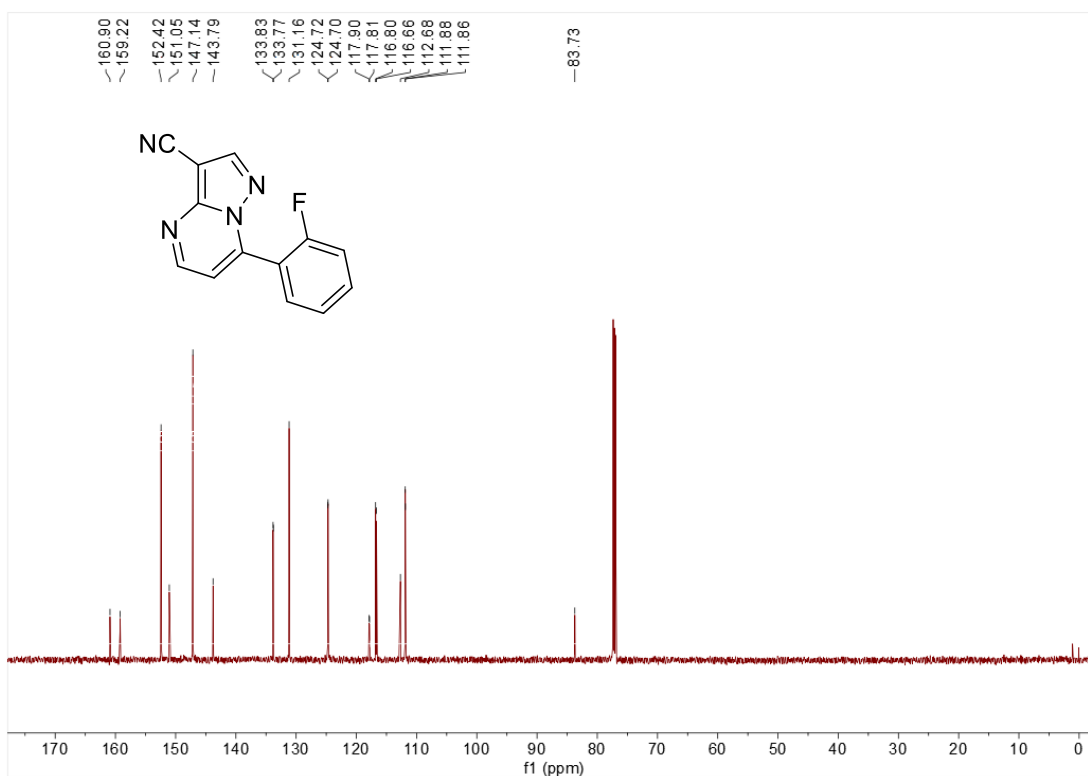



7-(2-chlorophenyl)pyrazolo[1,5-a]pyrimidine-3-carbonitrile (**1i**)

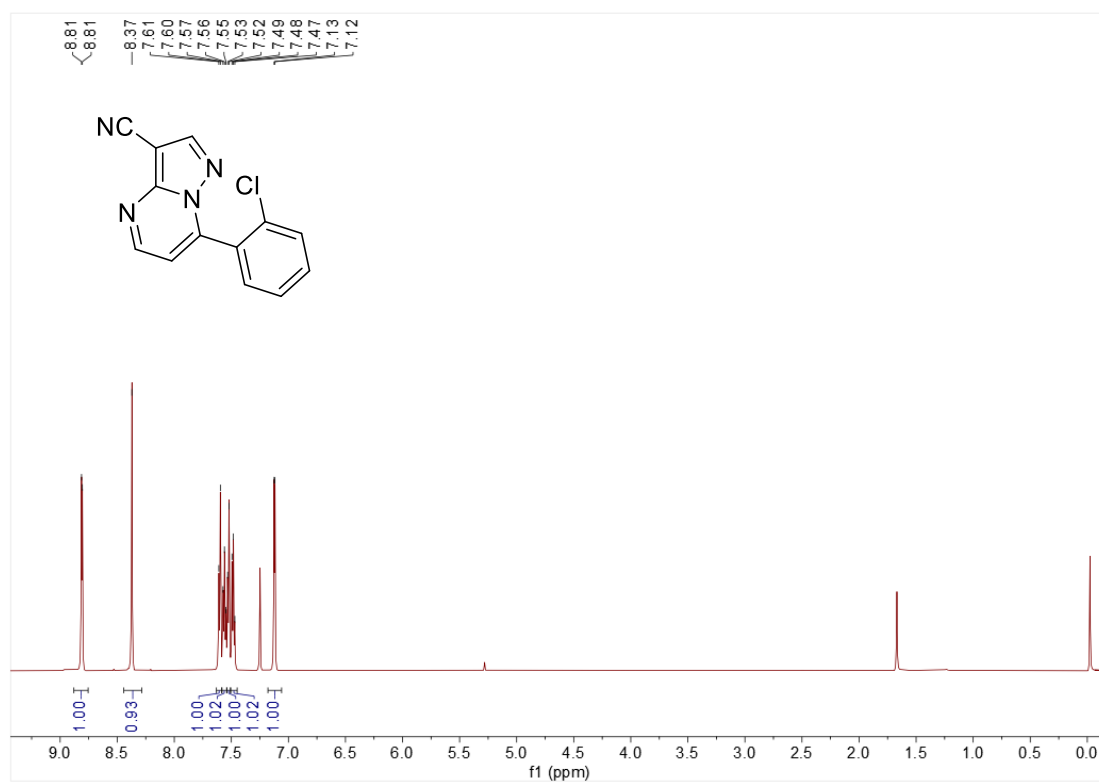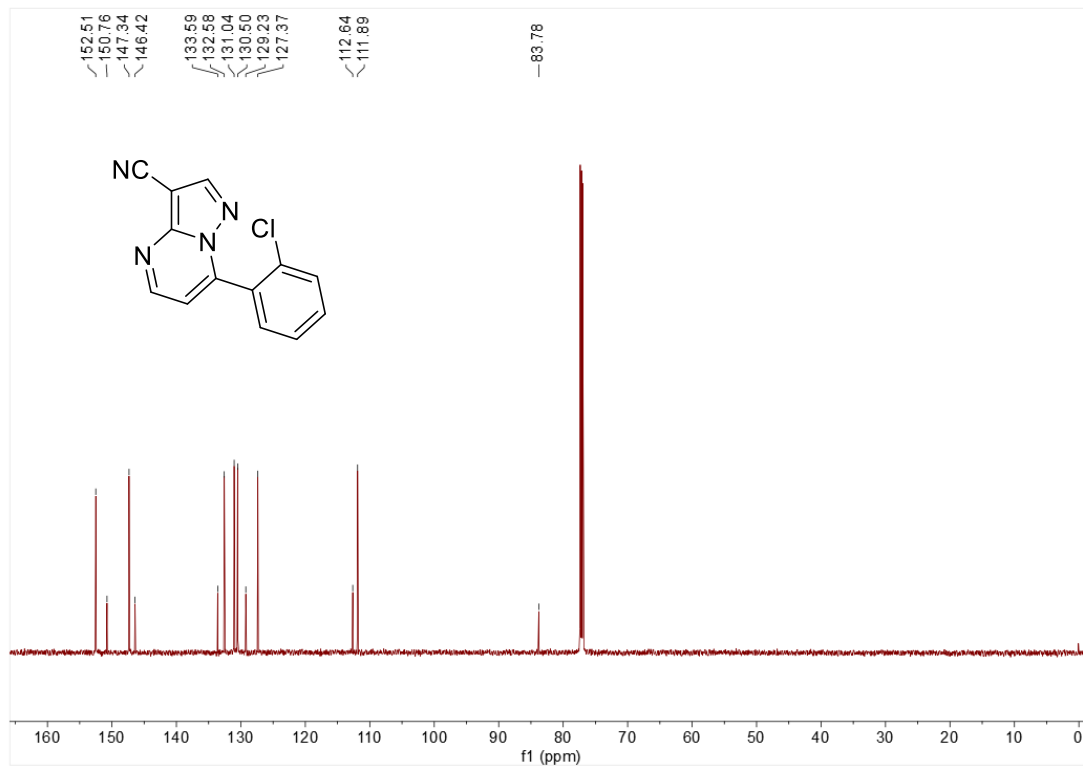

7-(2-bromophenyl)pyrazolo[1,5-a]pyrimidine-3-carbonitrile (**1j**)

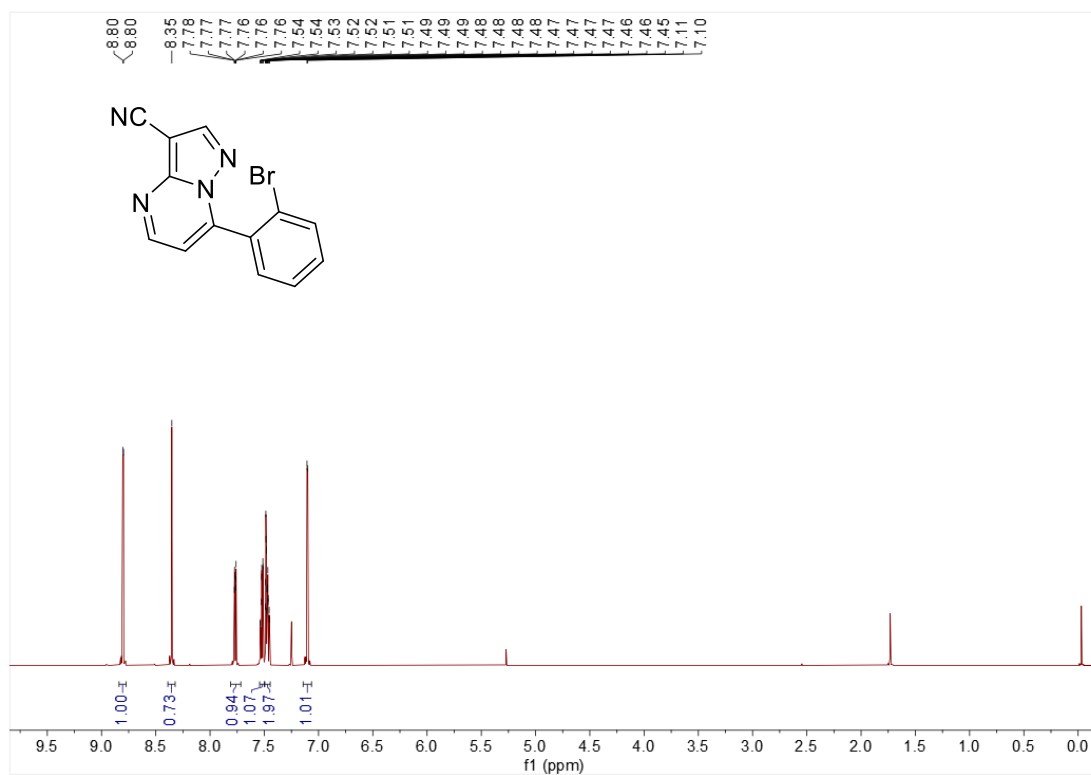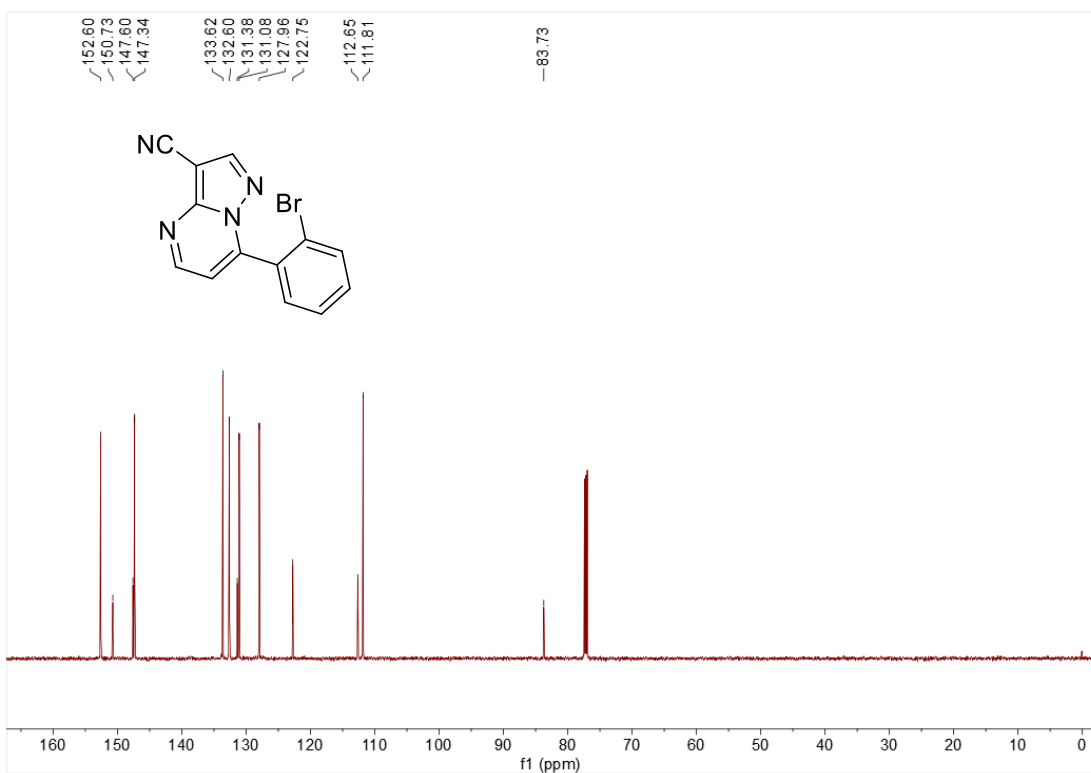

7-(2-methoxyphenyl)pyrazolo[1,5-*a*]pyrimidine-3-carbonitrile (**1k**)

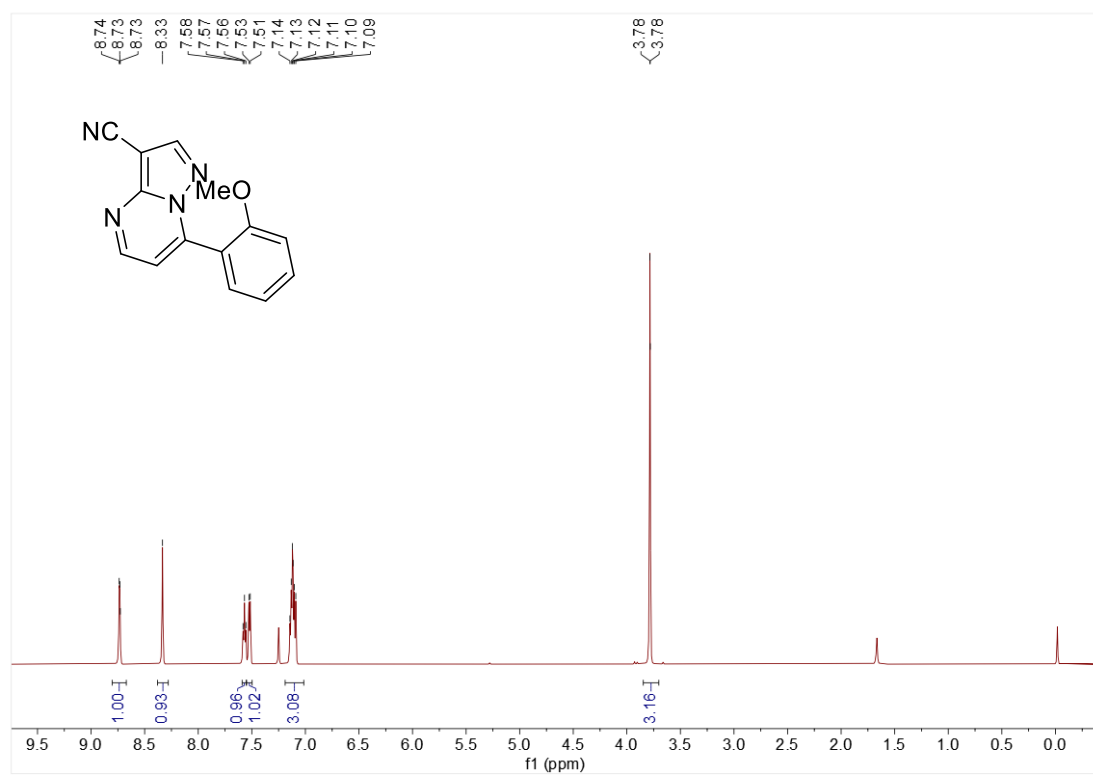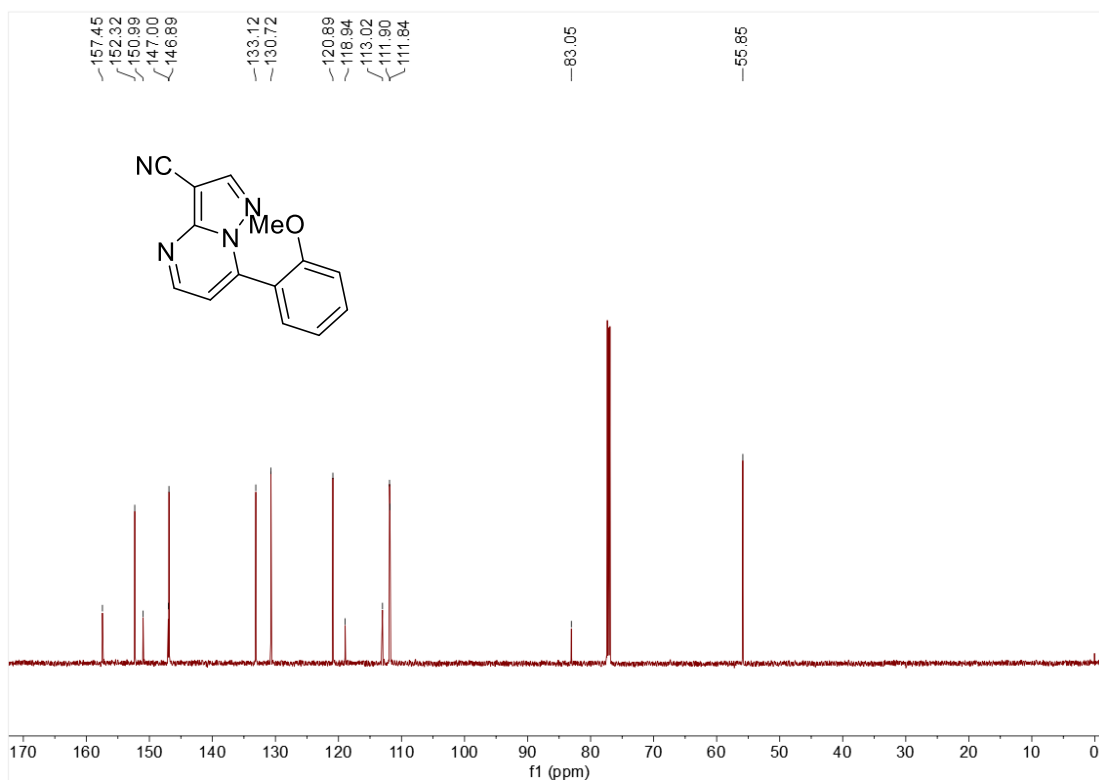

7-(4-fluorophenyl)pyrazolo[1,5-a]pyrimidine-3-carbonitrile (**II**)

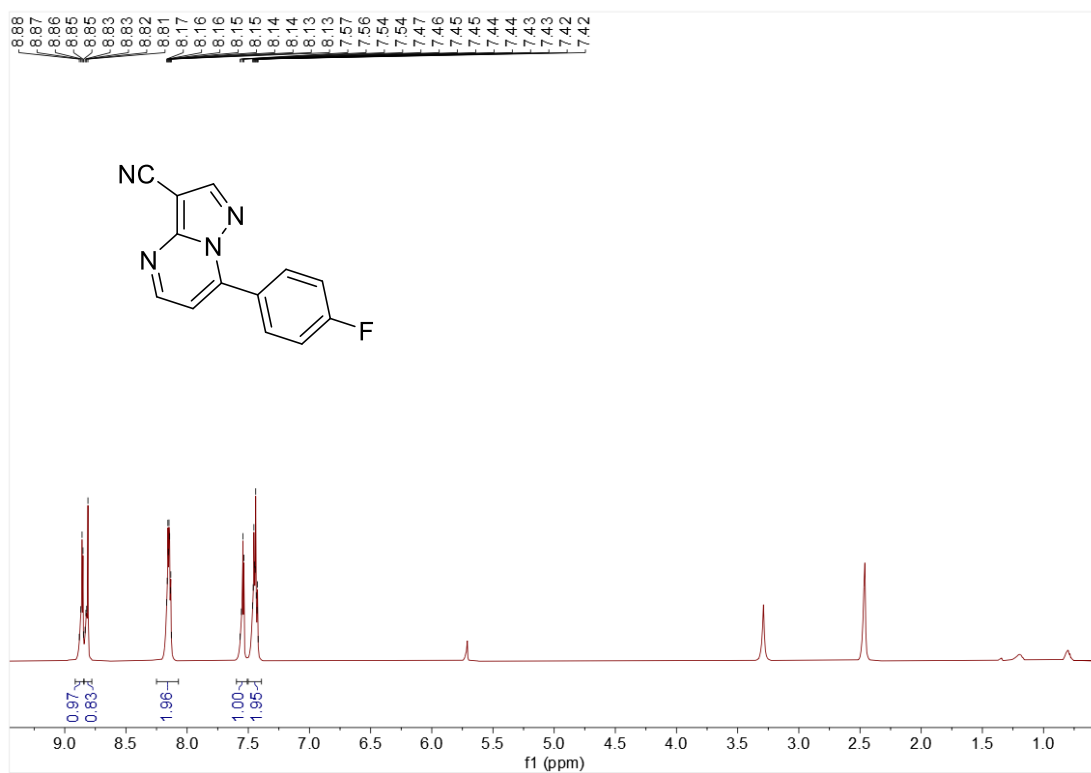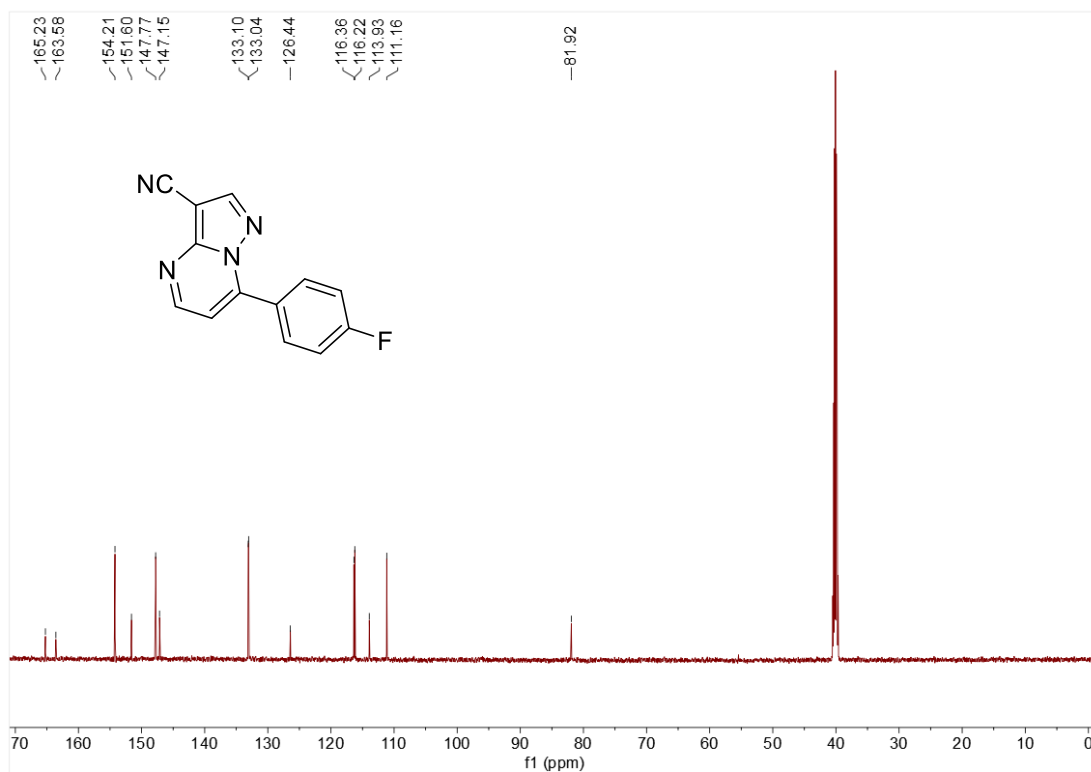

7-(4-chlorophenyl)pyrazolo[1,5-a]pyrimidine-3-carbonitrile (**1m**)

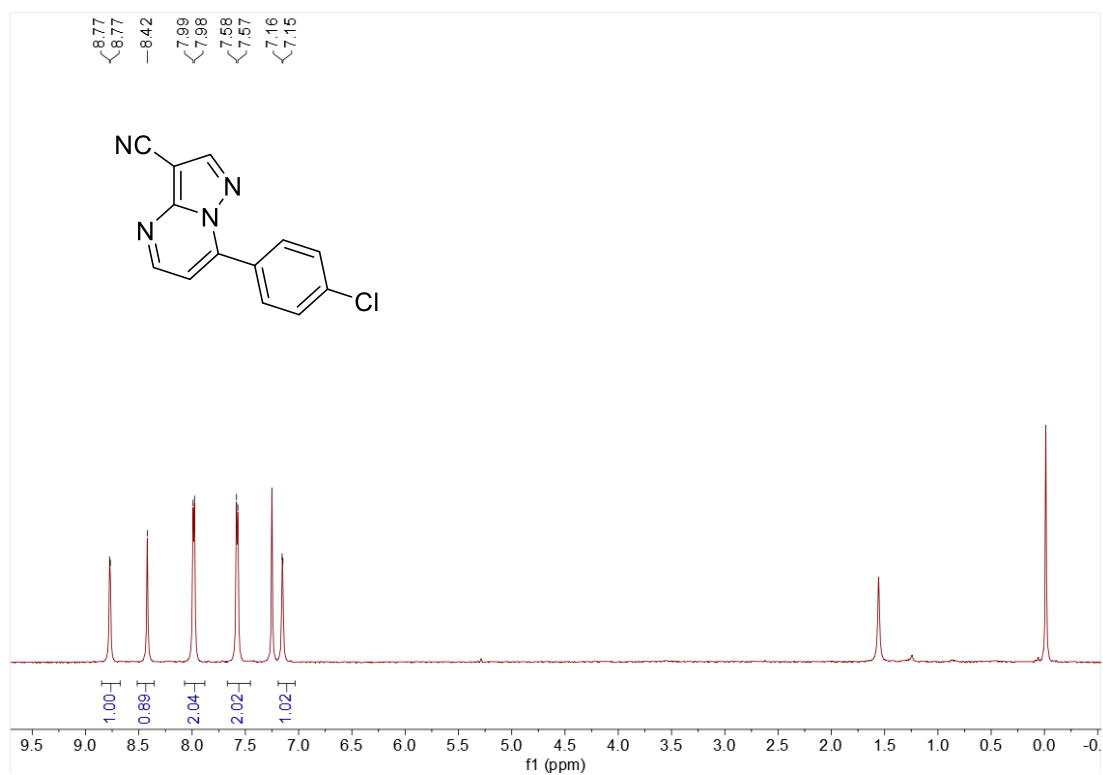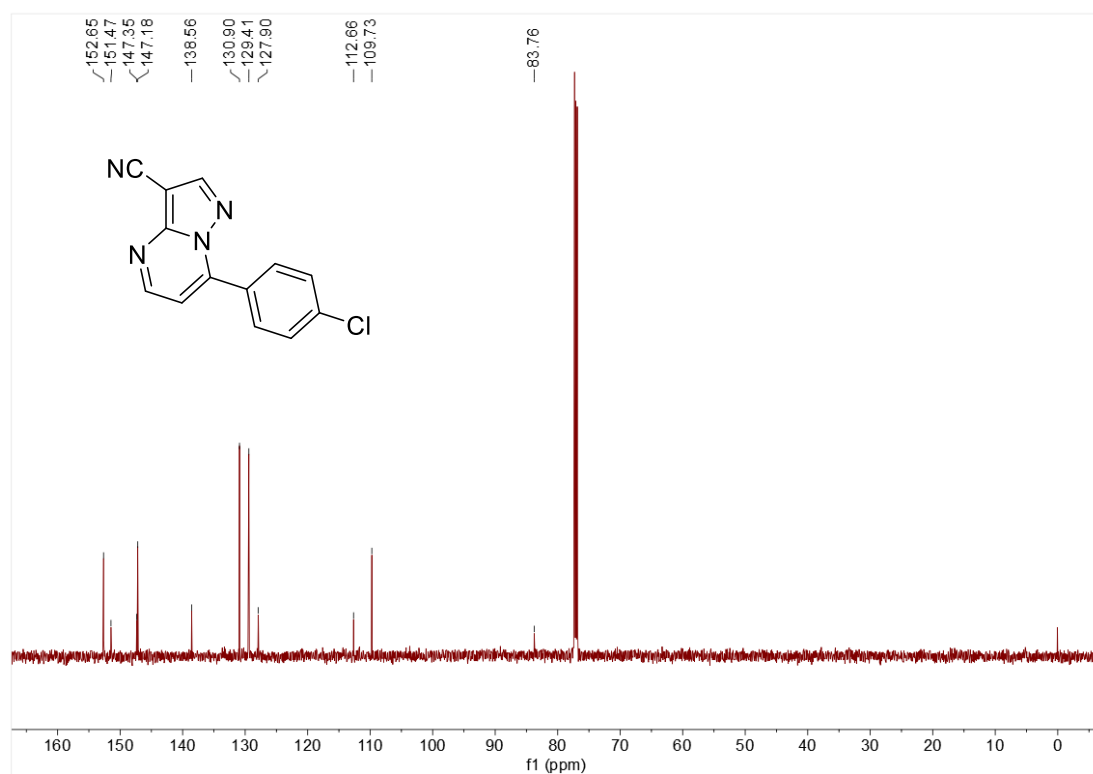

7-(4-bromophenyl)pyrazolo[1,5-*a*]pyrimidine-3-carbonitrile (**1n**)

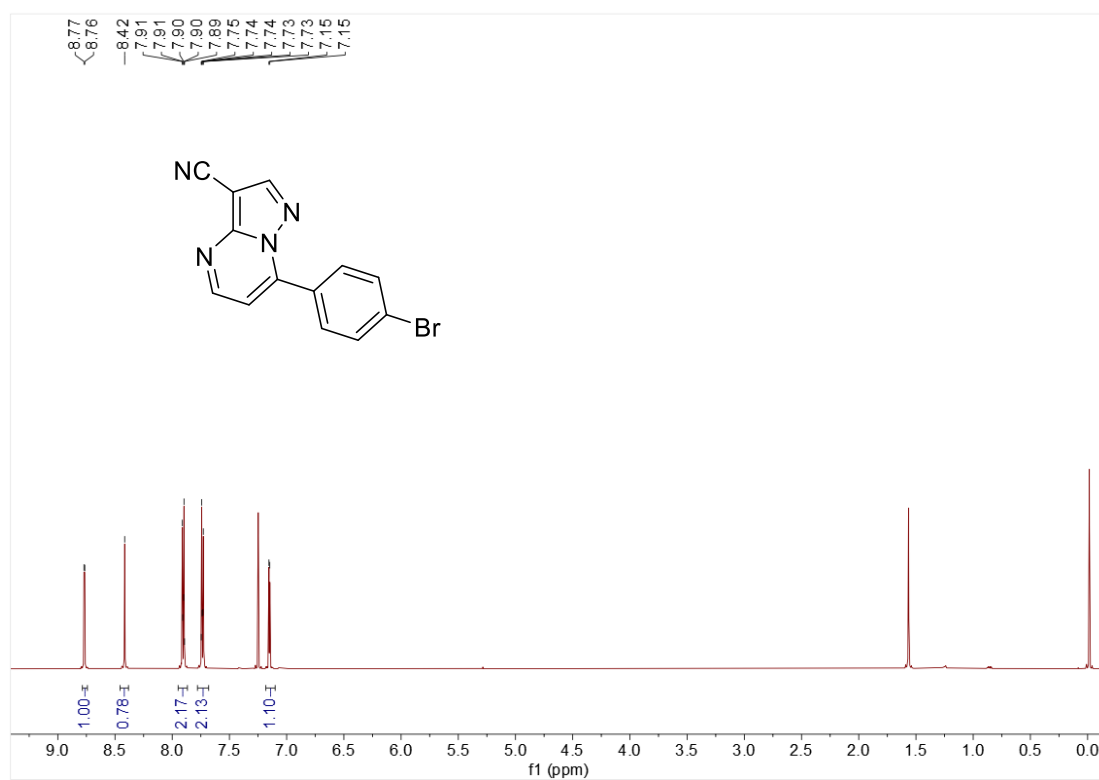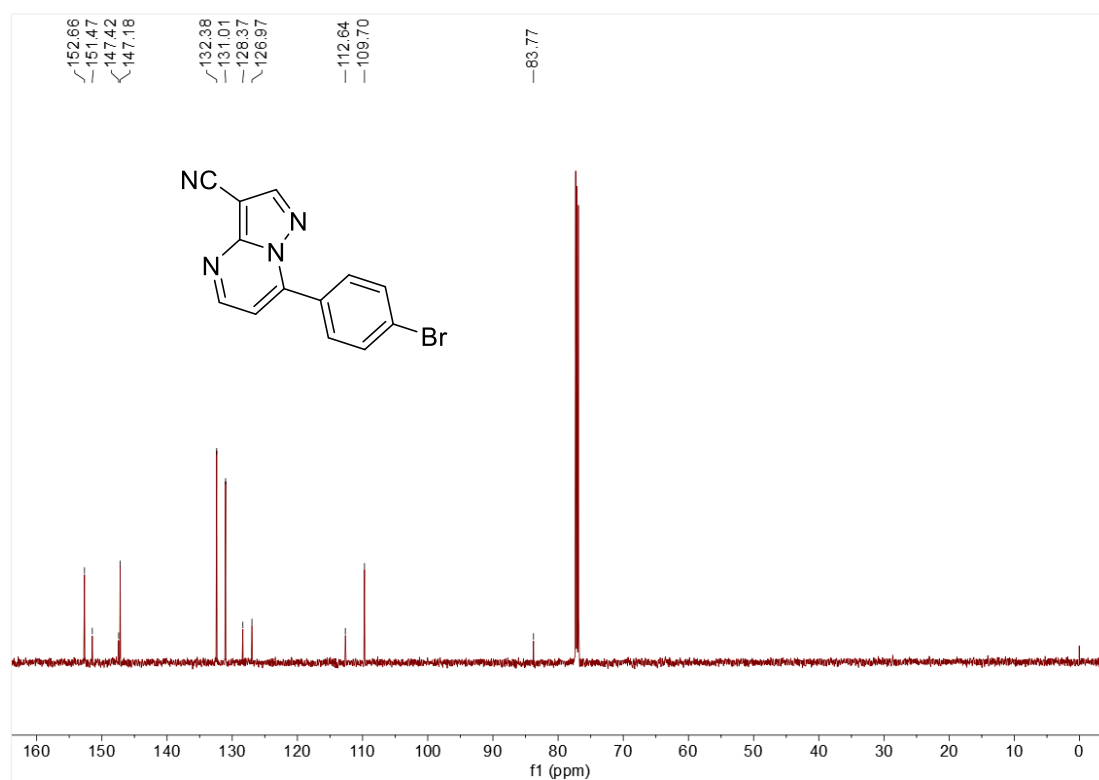

2,7-diphenylpyrazolo[1,5-a]pyrimidine-3-carbonitrile (**10**)

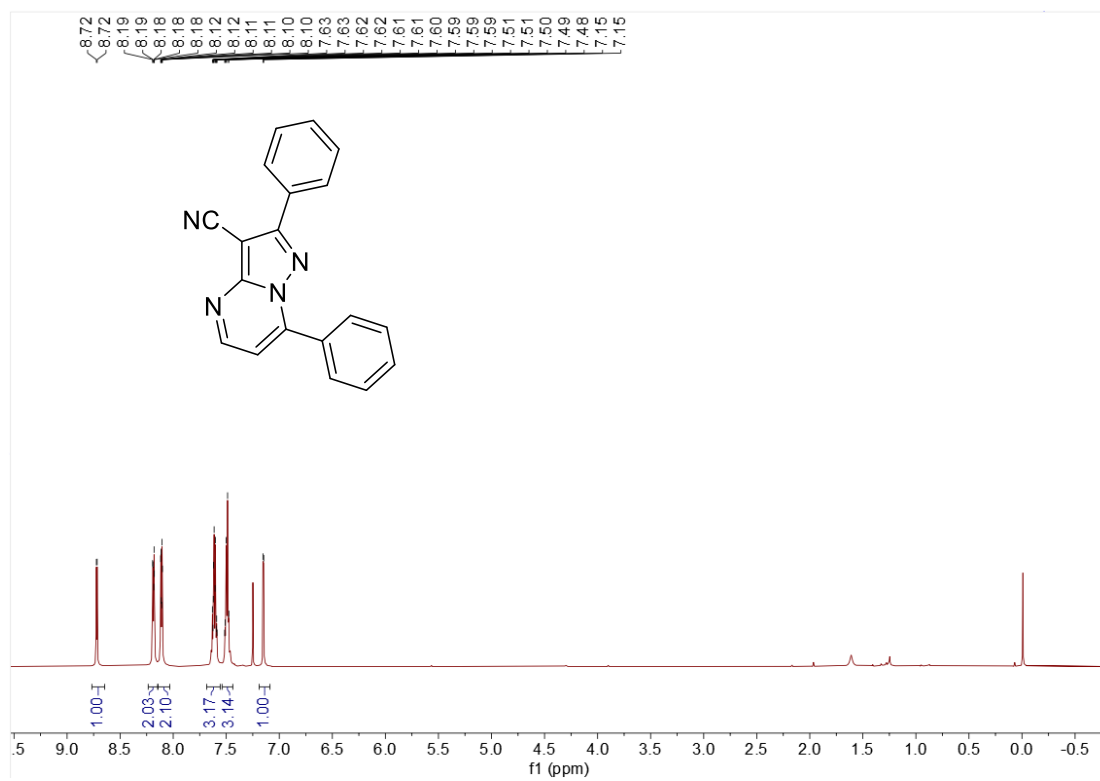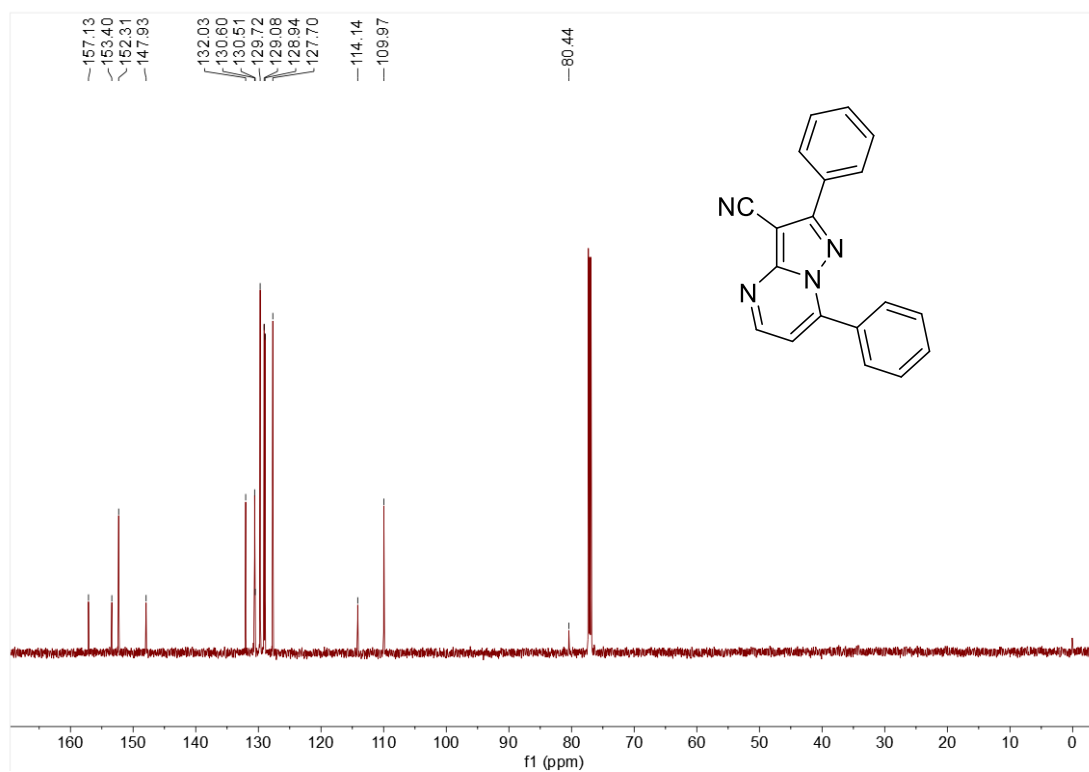

ethyl 7-phenylpyrazolo[1,5-a]pyrimidine-3-carboxylate (**1p**)

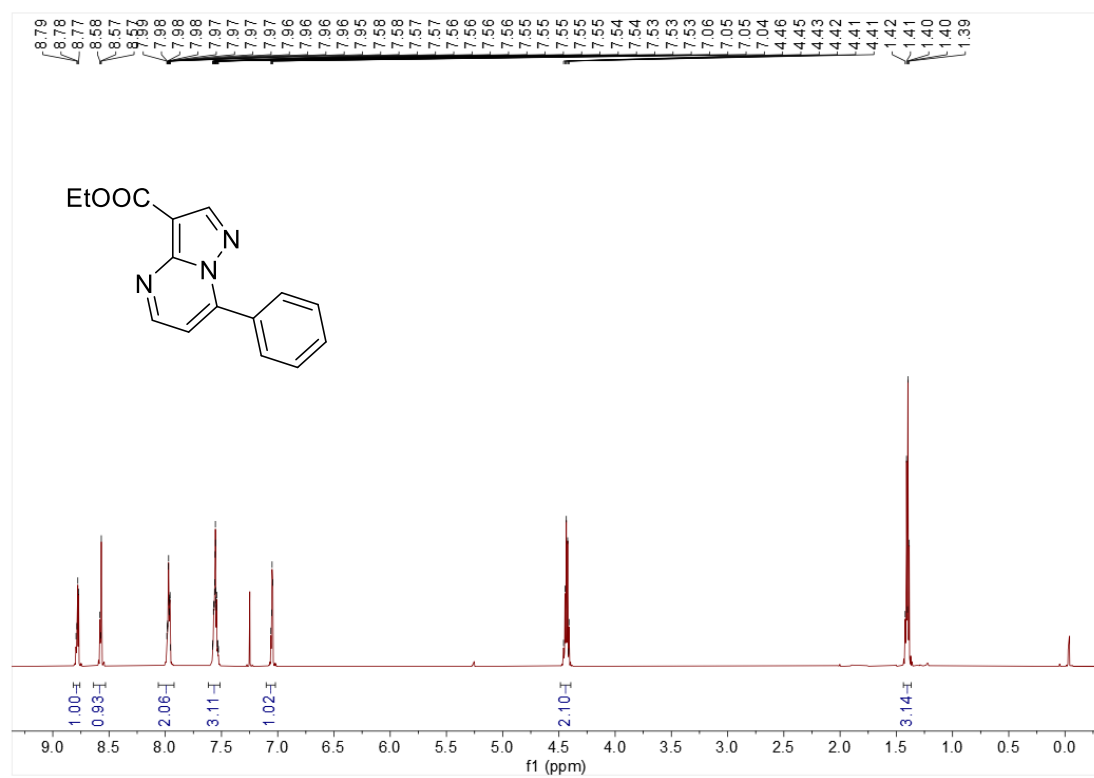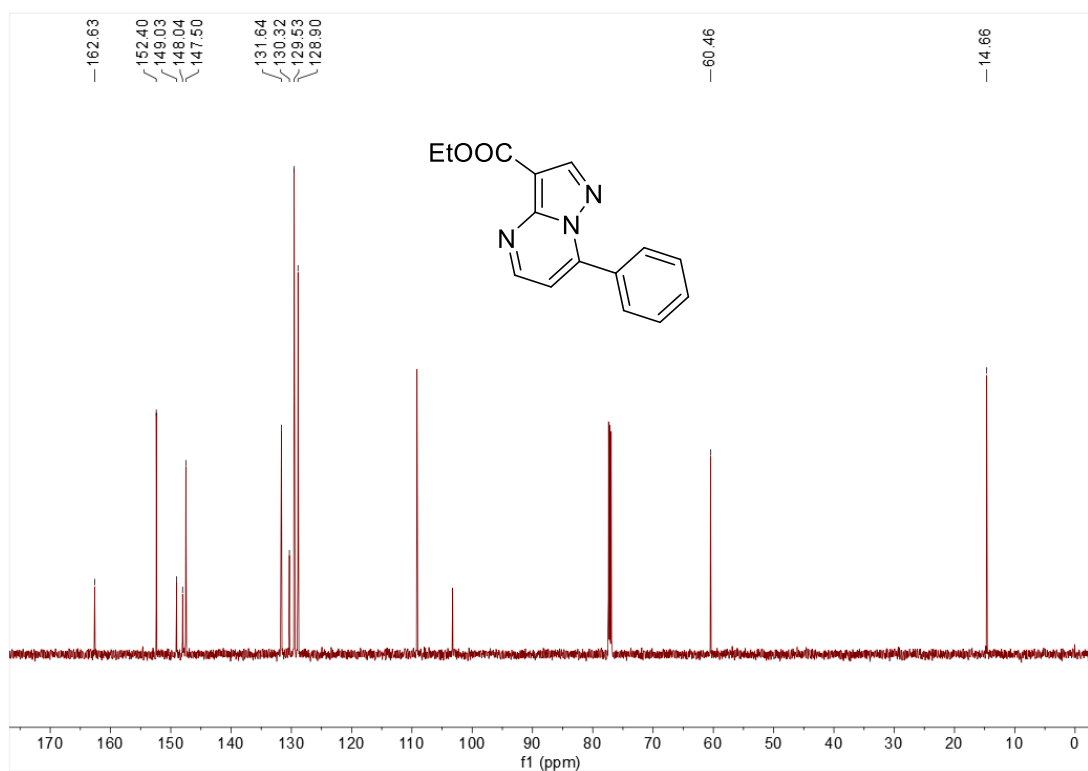



7-(pyridin-2-yl)pyrazolo[1,5-a]pyrimidine-3-carbonitrile (**1q**)

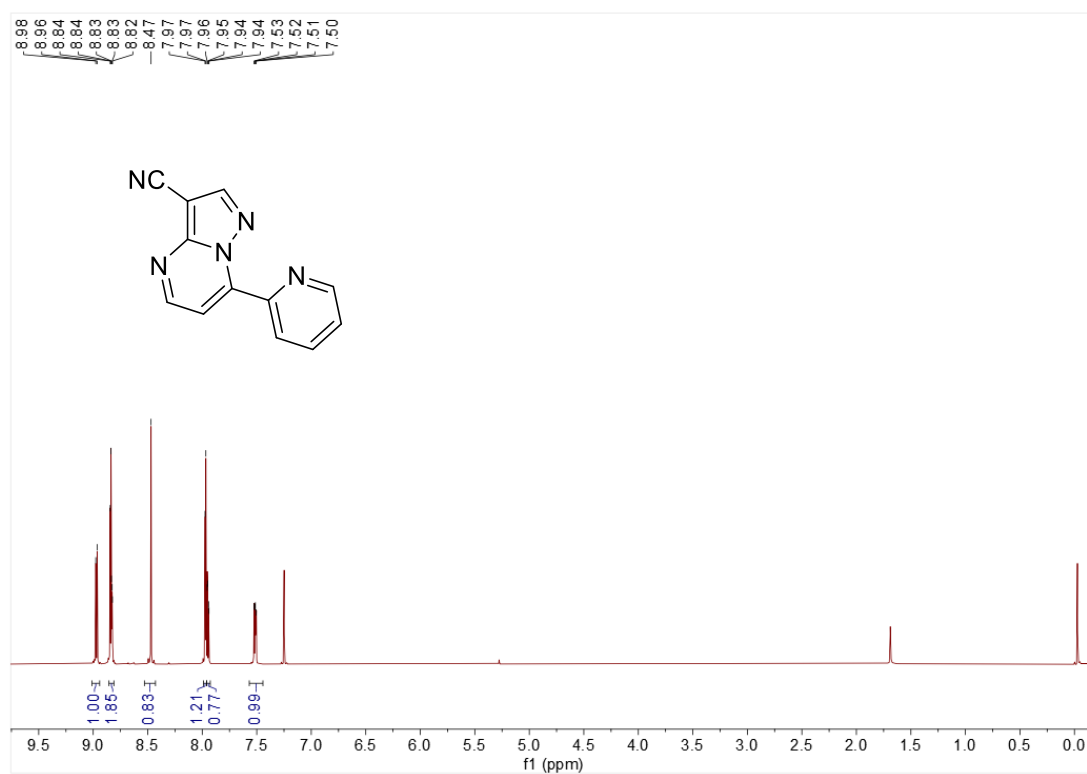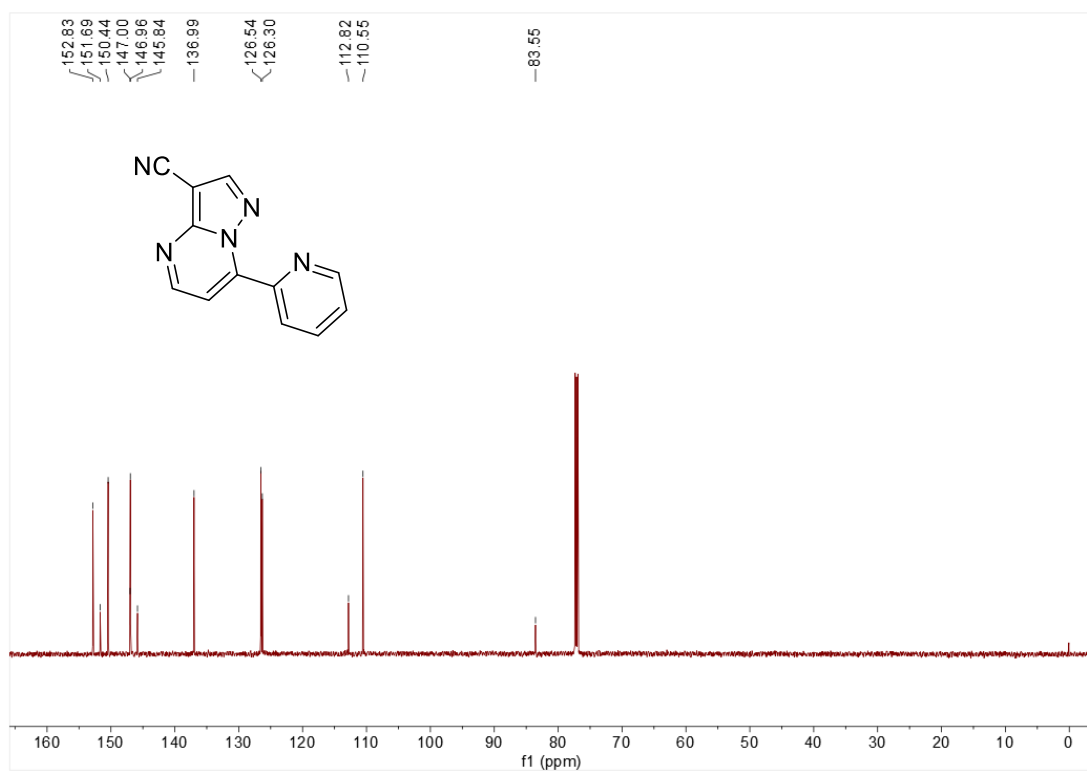

7-isopropylpyrazolo[1,5-*a*]pyrimidine-3-carbonitrile (**1r**)

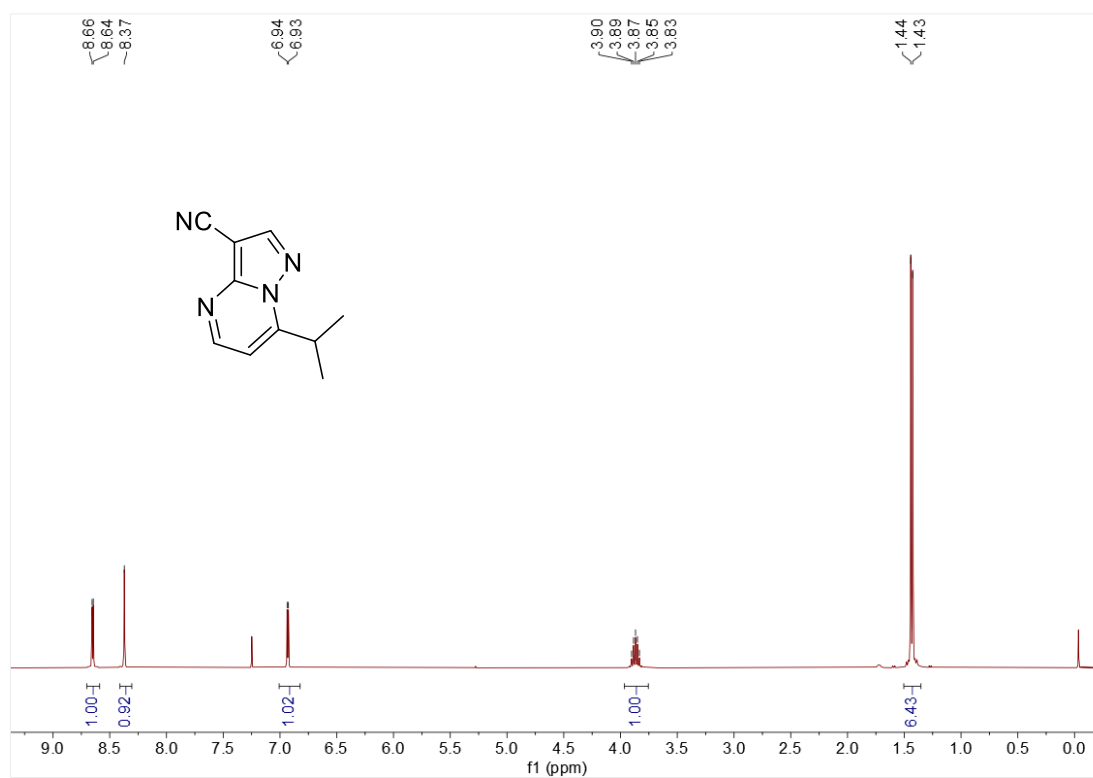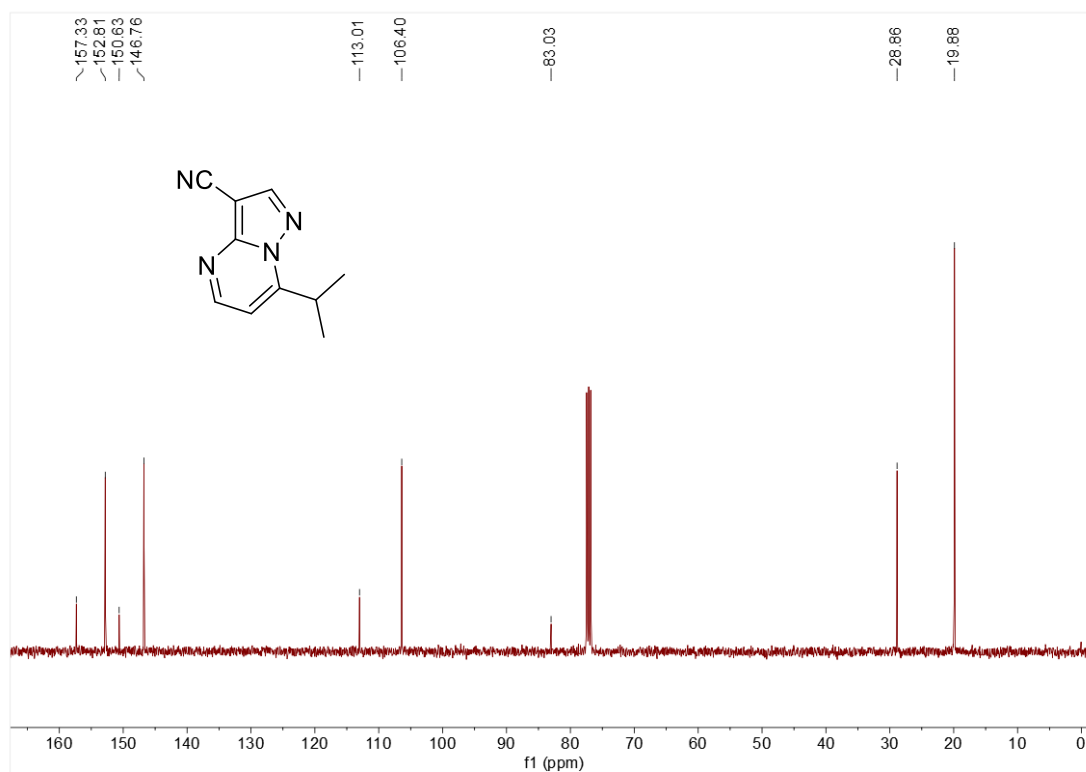

7-(*tert*-butyl)pyrazolo[1,5-*a*]pyrimidine-3-carbonitrile (**1s**)

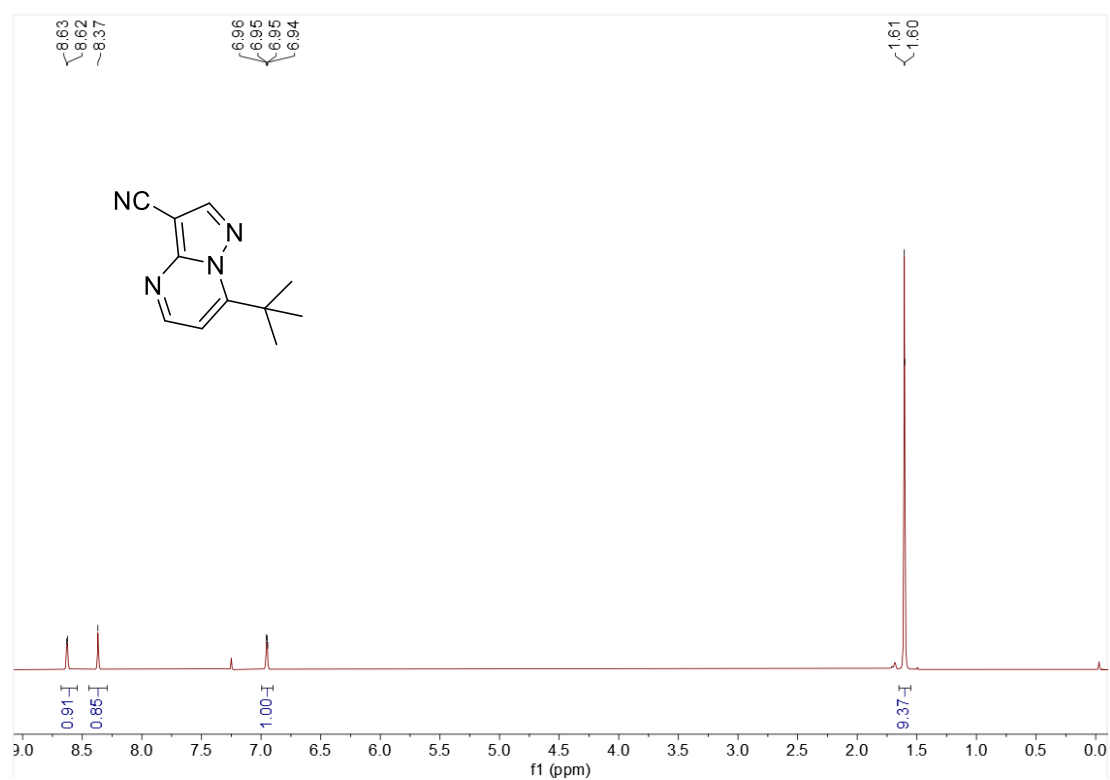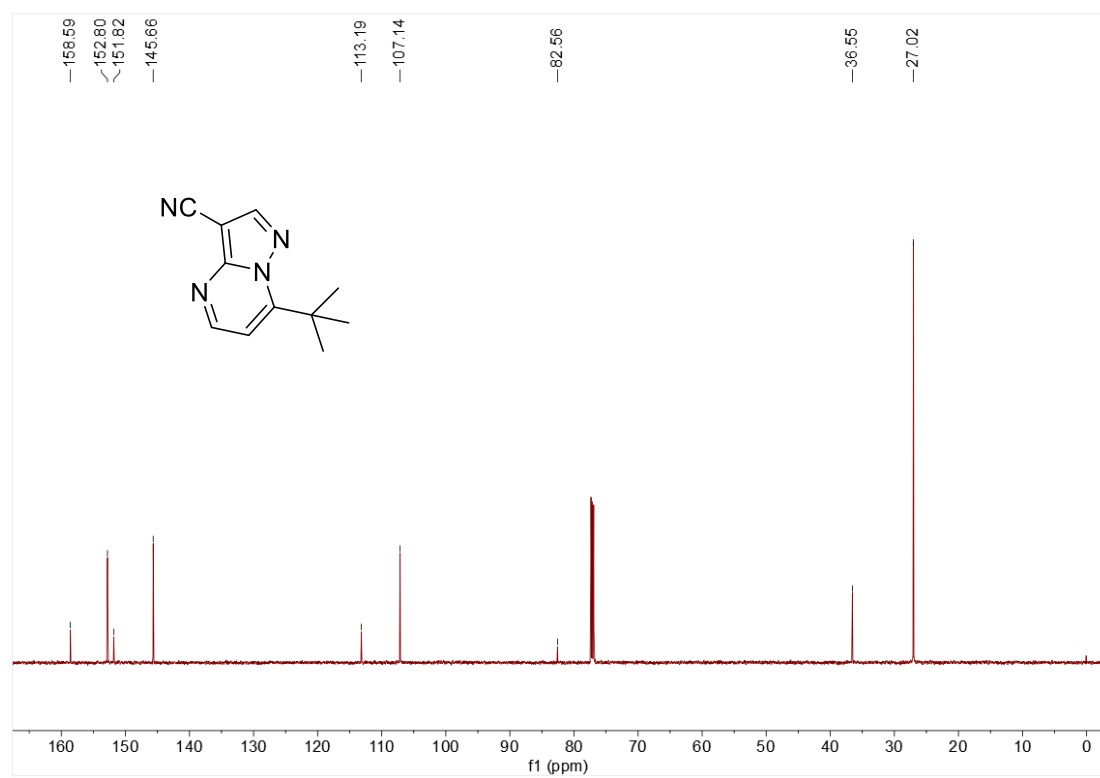

*tert*-butyl 4-(3-cyano-2-(4-phenoxyphenyl)pyrazolo[1,5-a]pyrimidin-7-yl)piperidine-1-carboxylate (**1t**)

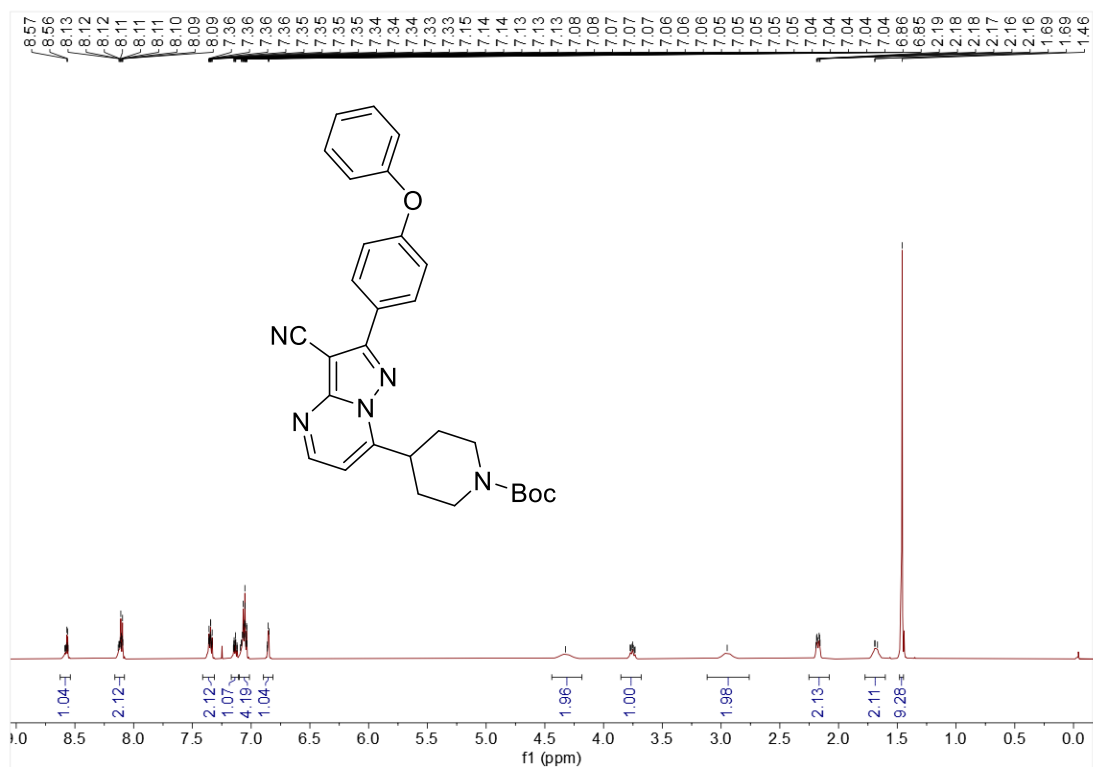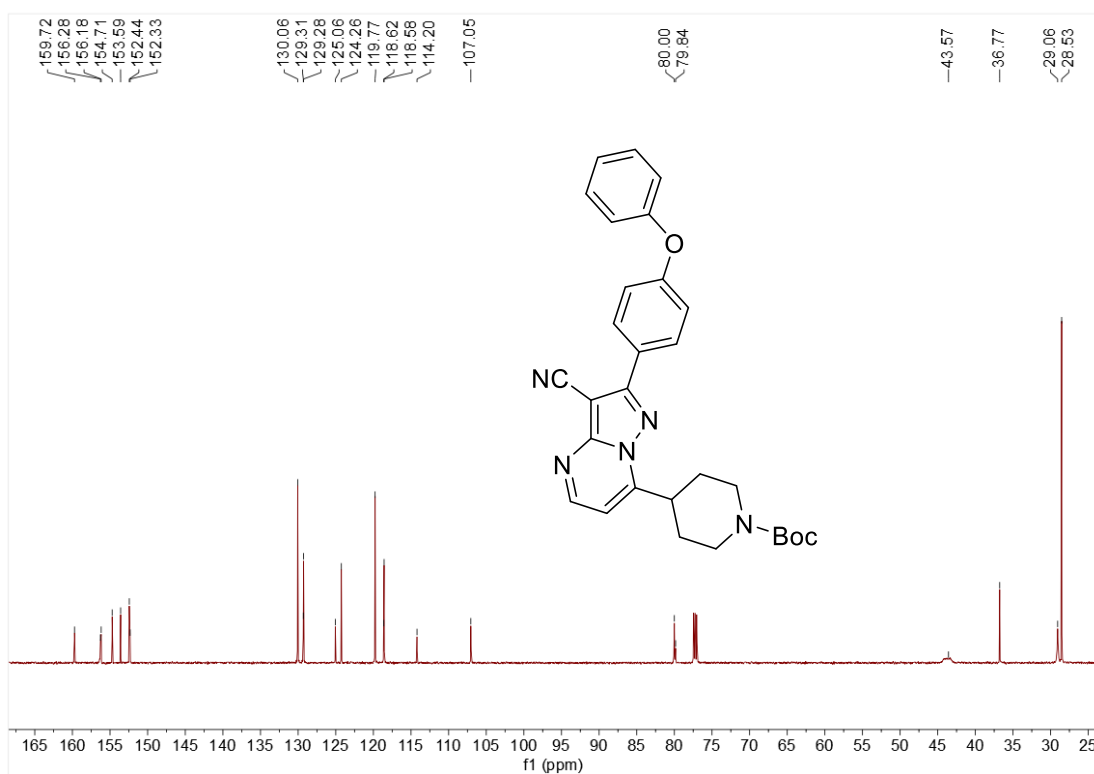

2,7-diphenylpyrazolo[1,5-a]pyrimidine (**3a**)

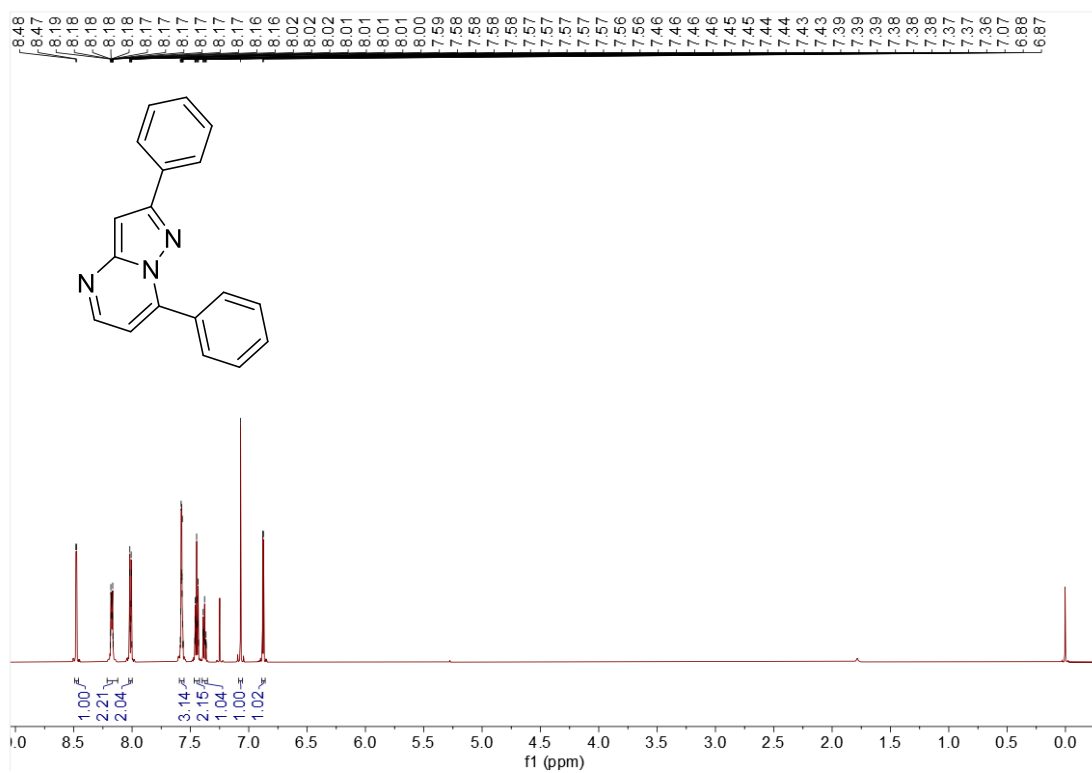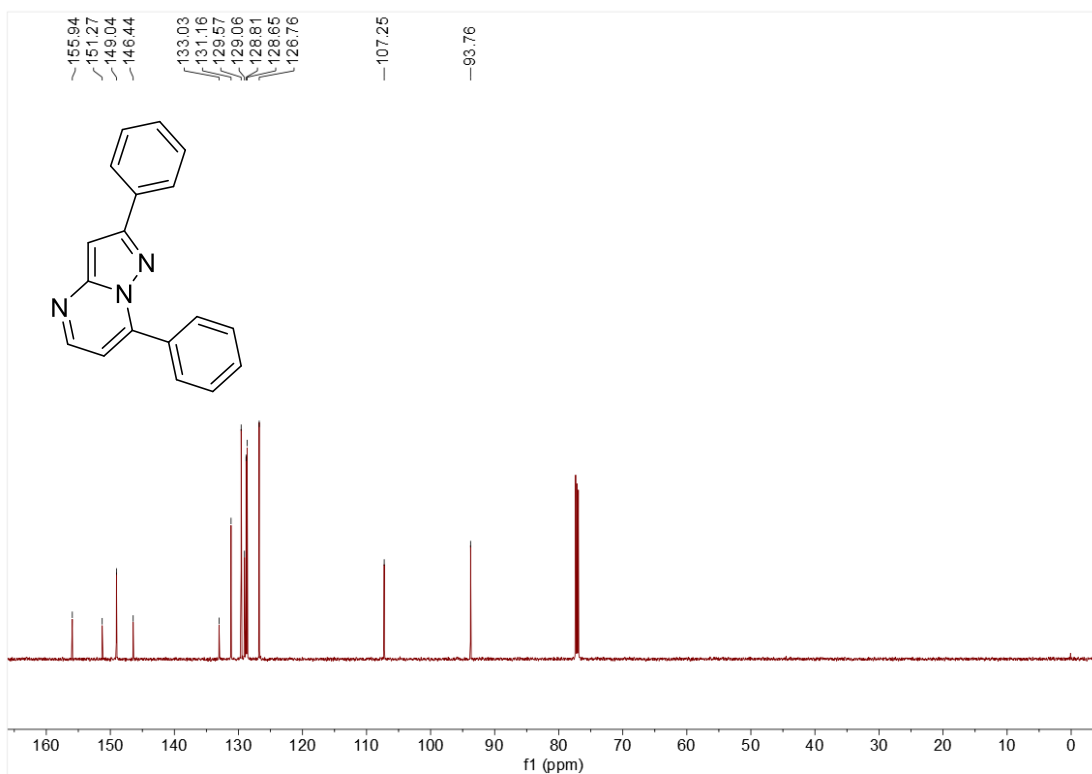

7-phenyl-2-(*o*-tolyl)pyrazolo[1,5-*a*]pyrimidine (**3b**)

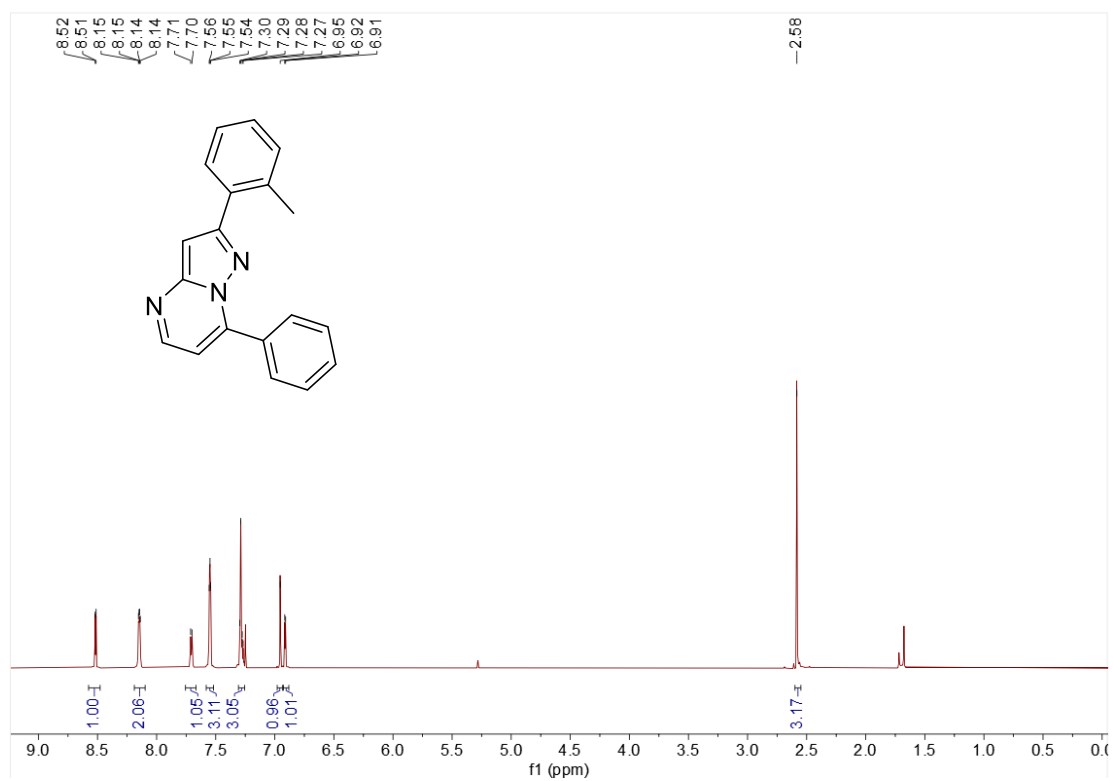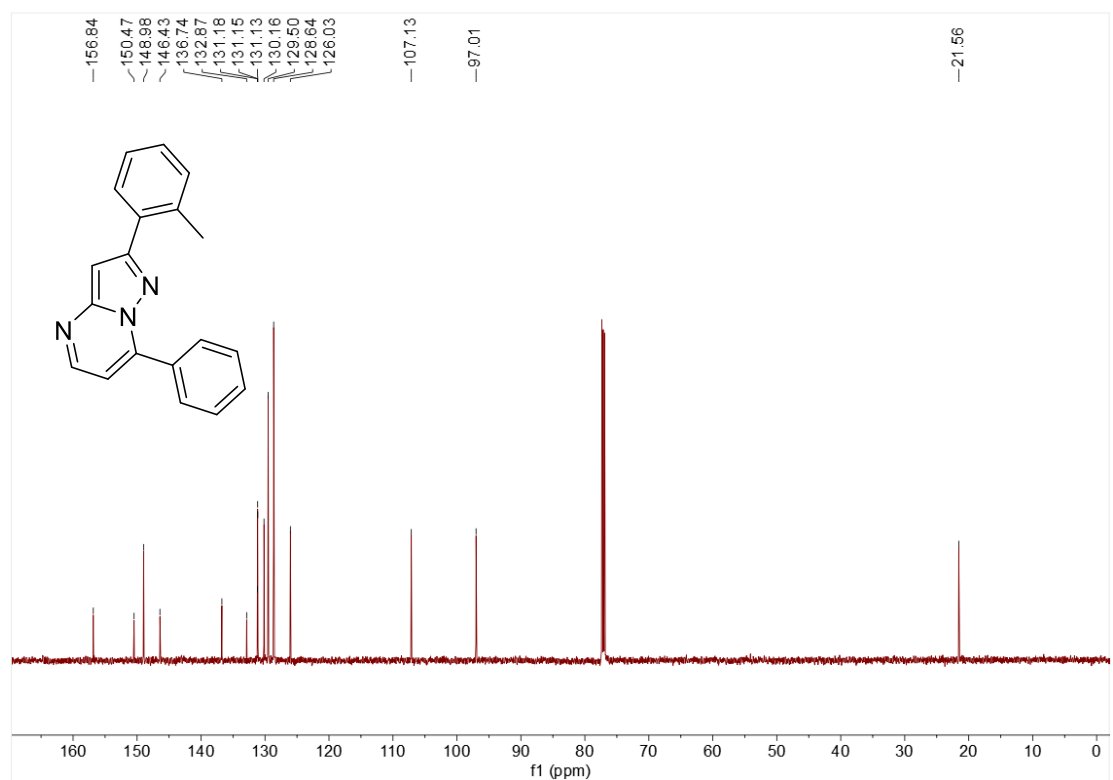

2-(2-methoxyphenyl)-7-phenylpyrazolo[1,5-a]pyrimidine (**3c**)

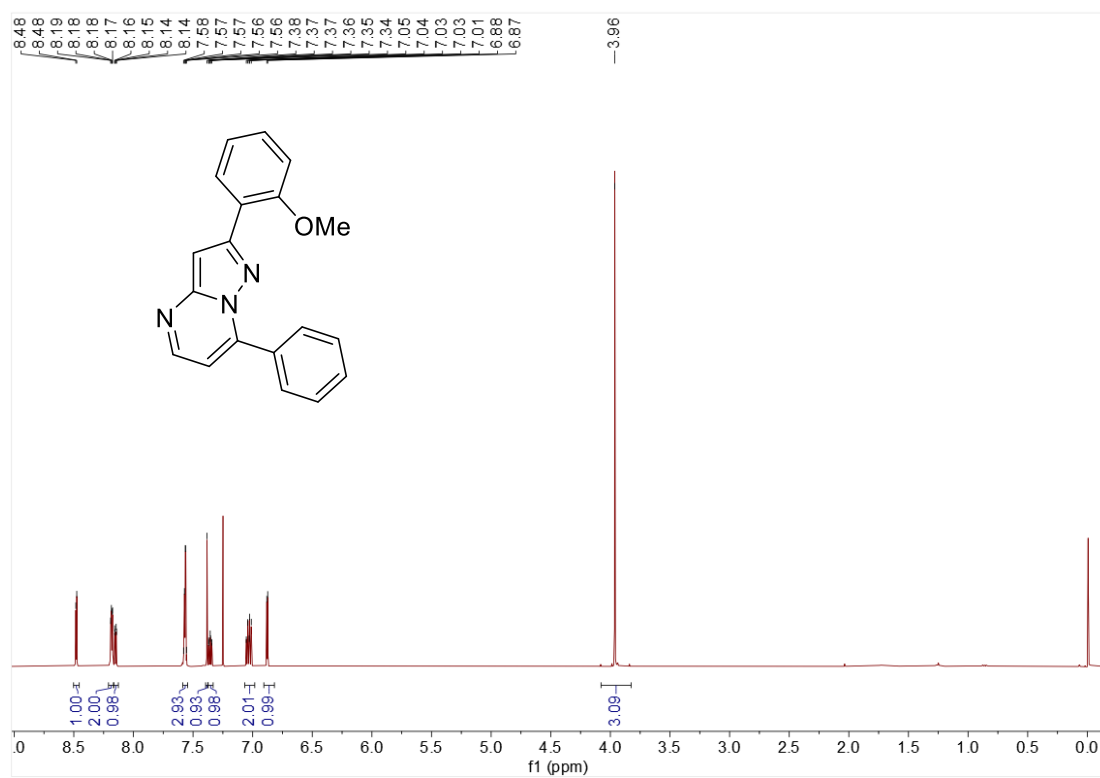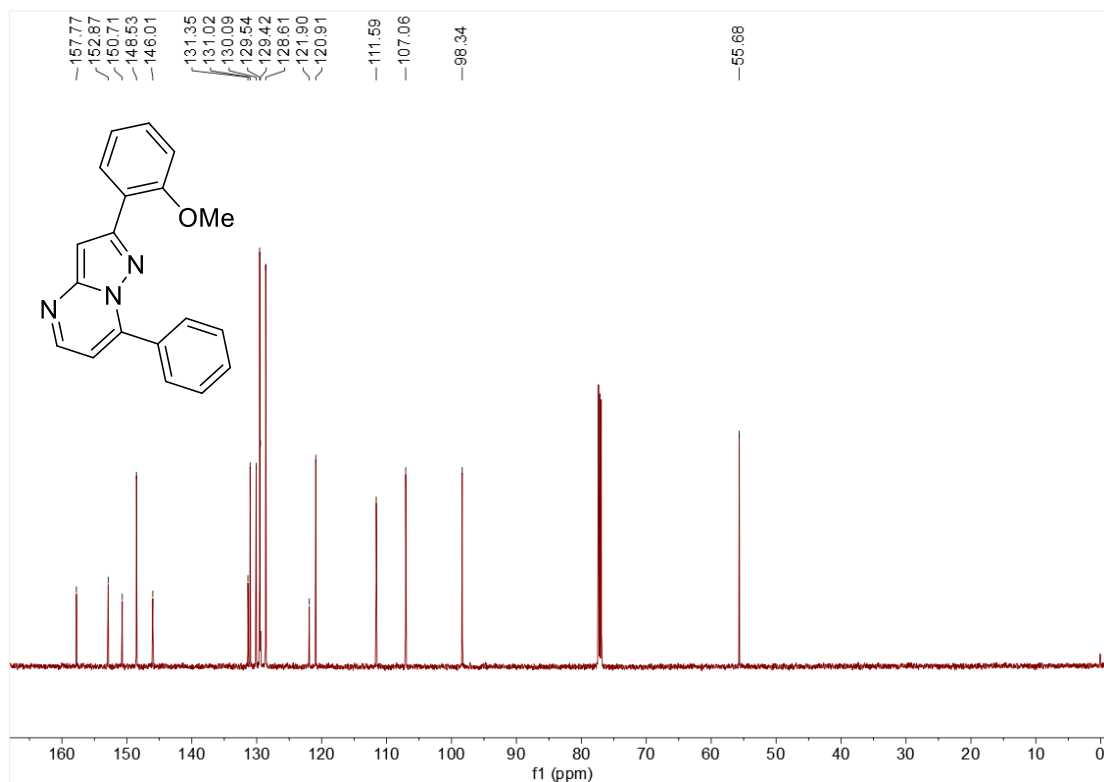

7-phenyl-2-(*m*-tolyl)pyrazolo[1,5-*a*]pyrimidine (**3d**)

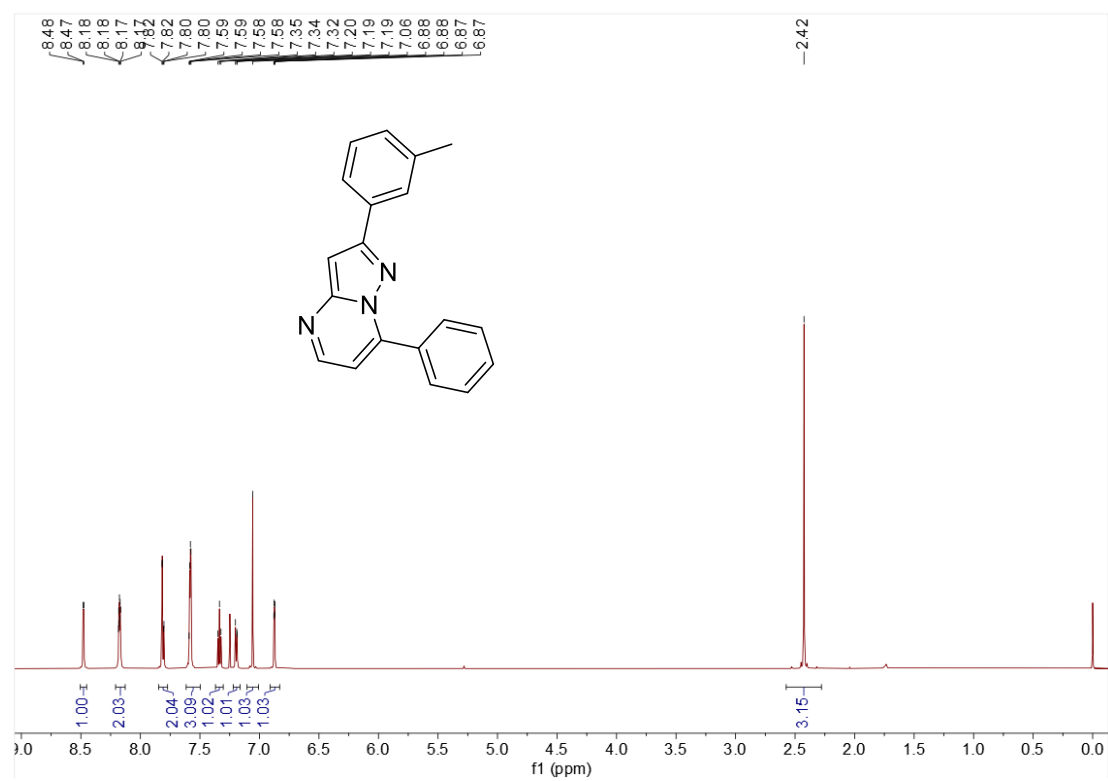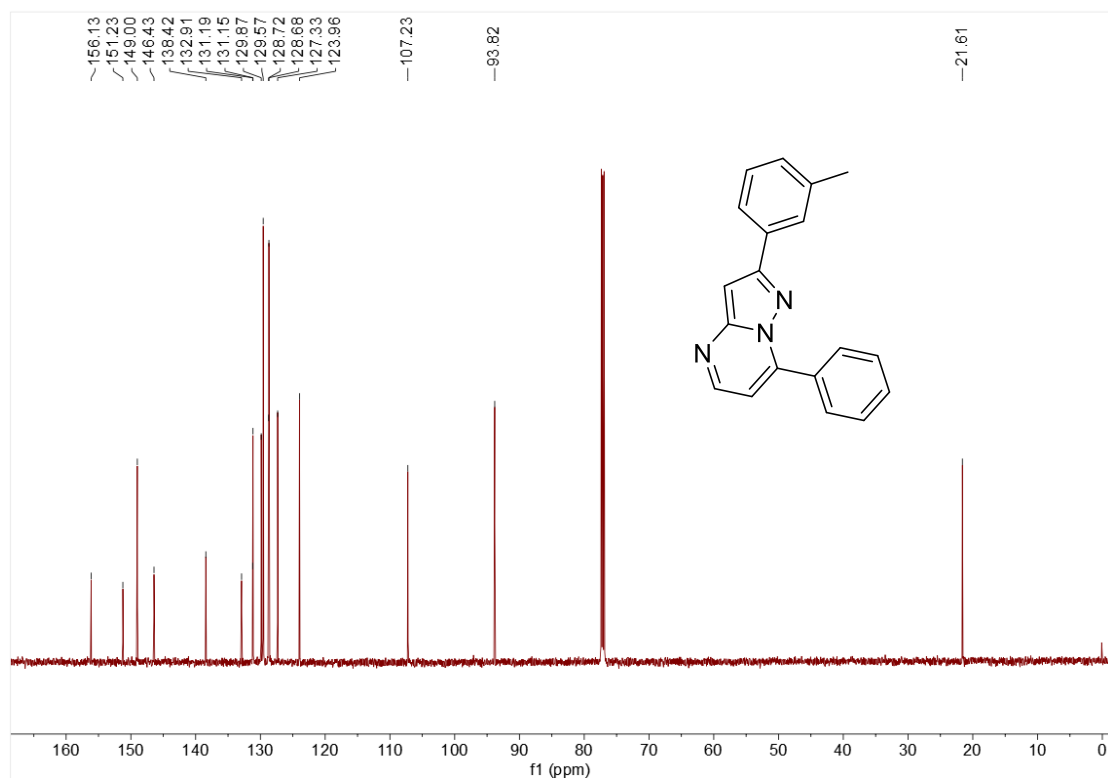



7-phenyl-2-(*p*-tolyl)pyrazolo[1,5-*a*]pyrimidine (**3e**)

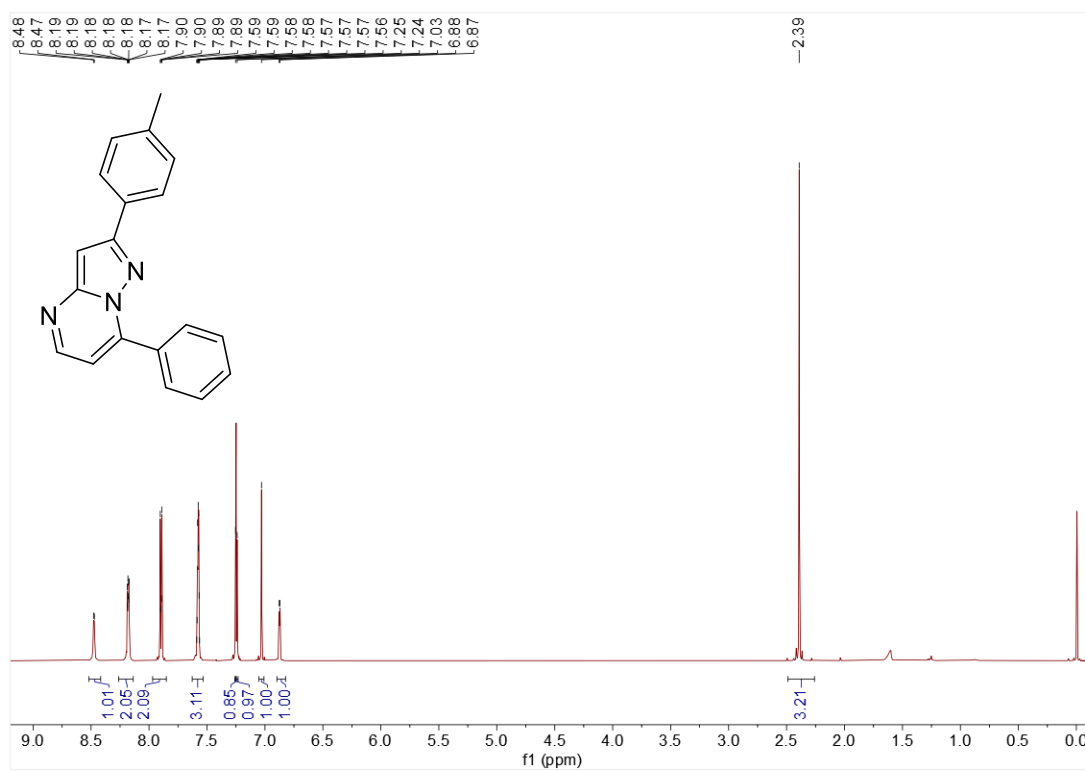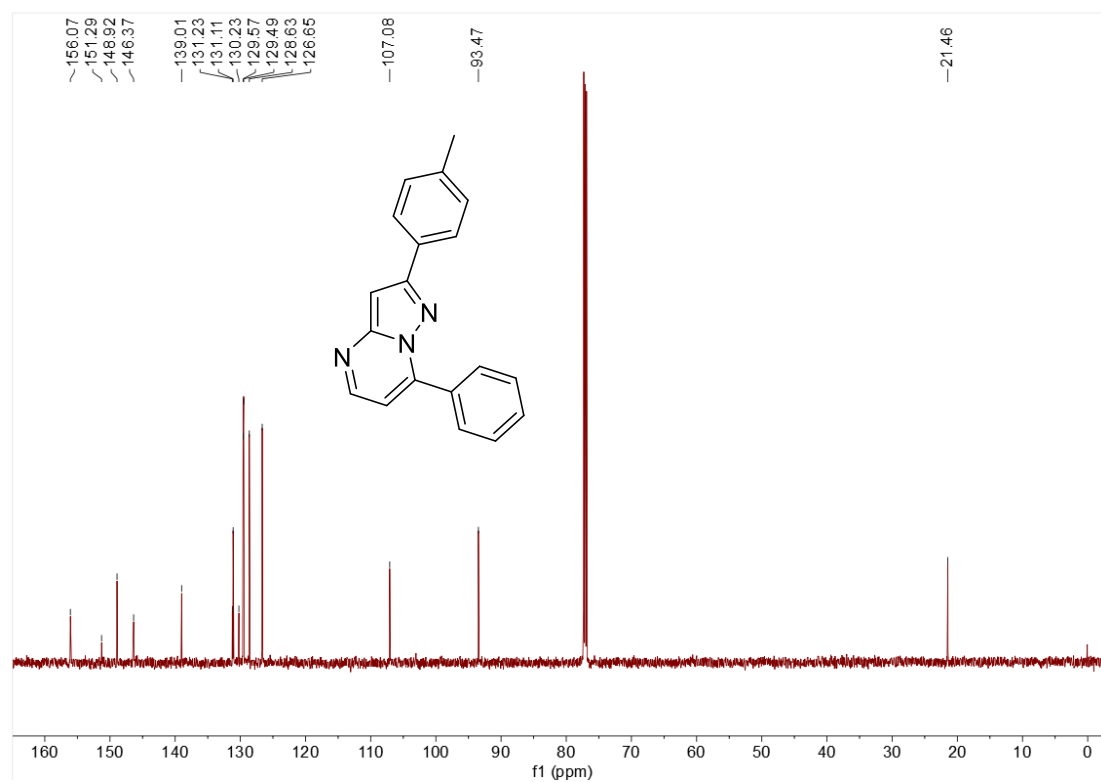

2-(4-methoxyphenyl)-7-phenylpyrazolo[1,5-a]pyrimidine (**3f**)

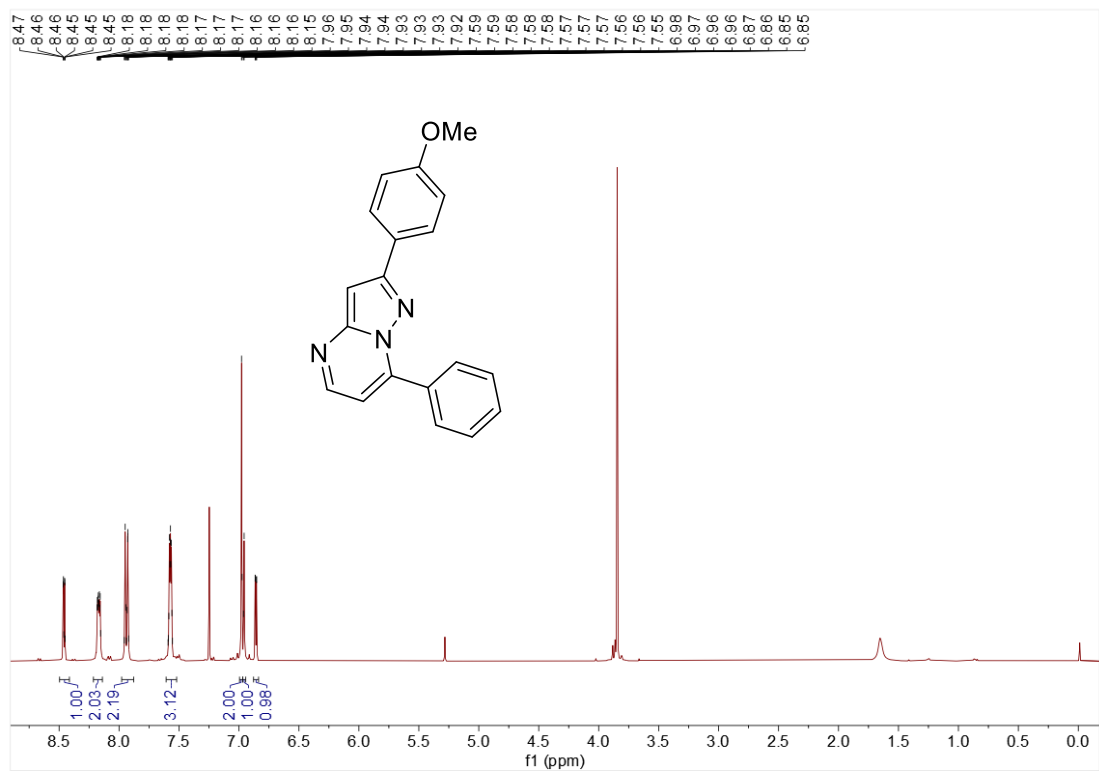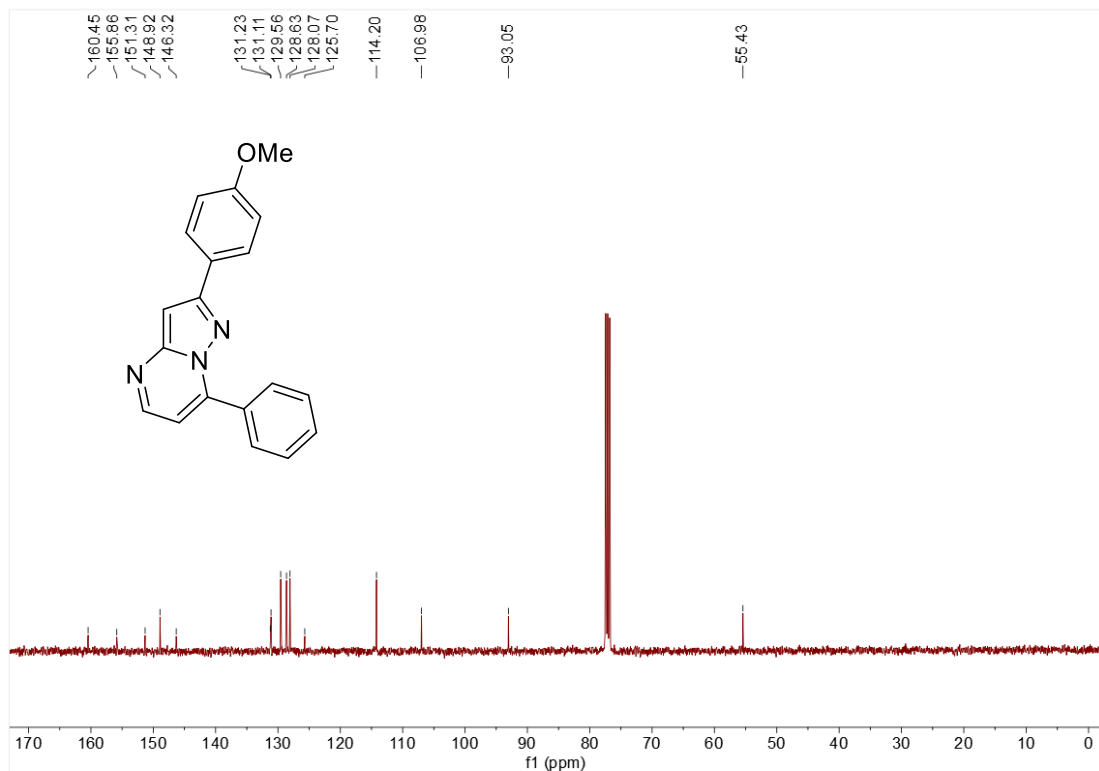

2-(2-chlorophenyl)-7-phenylpyrazolo[1,5-a]pyrimidine (**3g**)

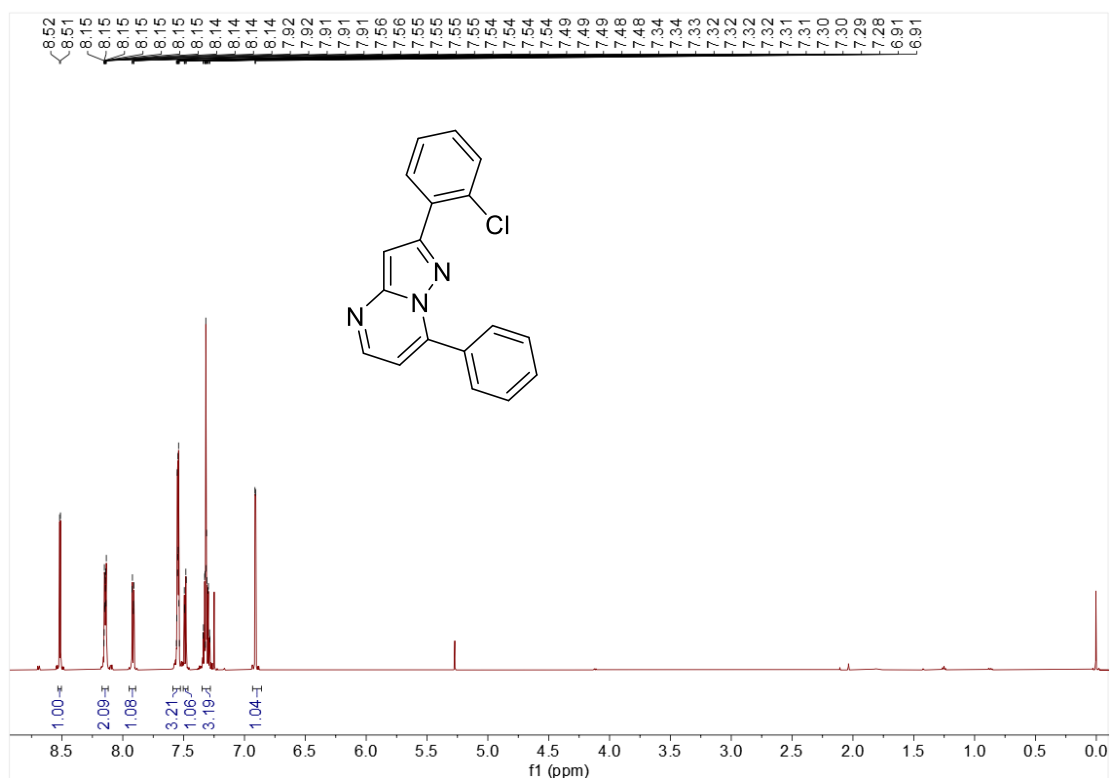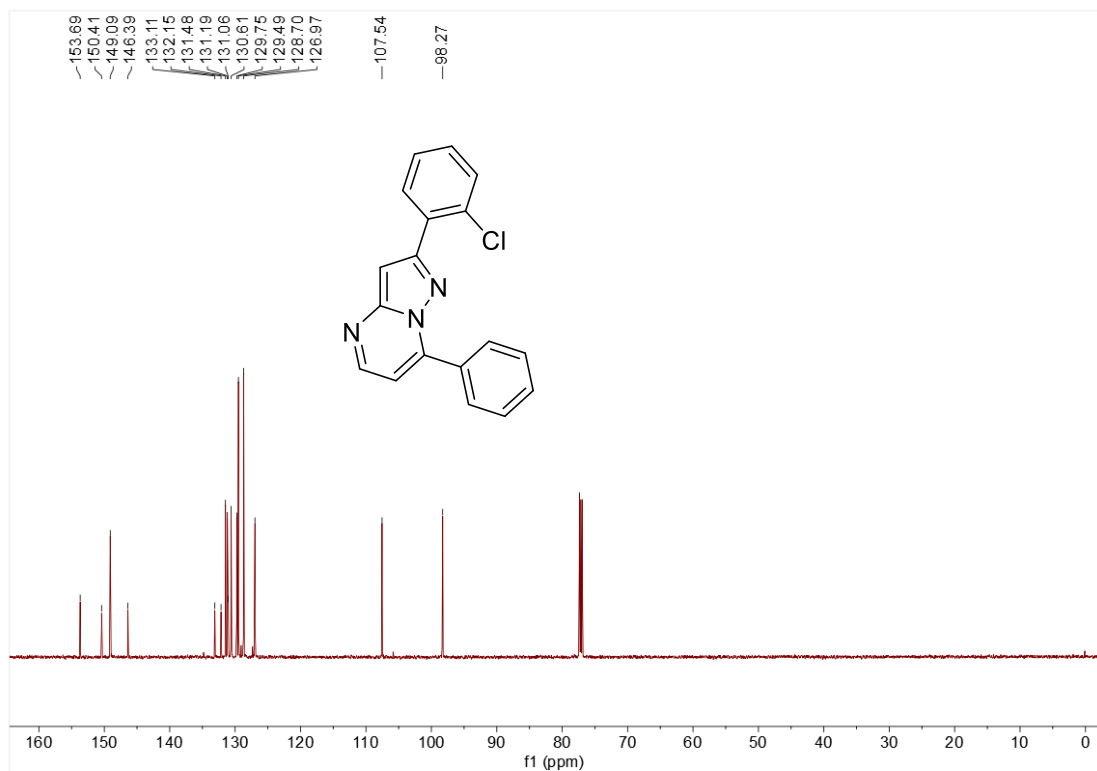

2-(3-fluorophenyl)-7-phenylpyrazolo[1,5-a]pyrimidine (**3h**)

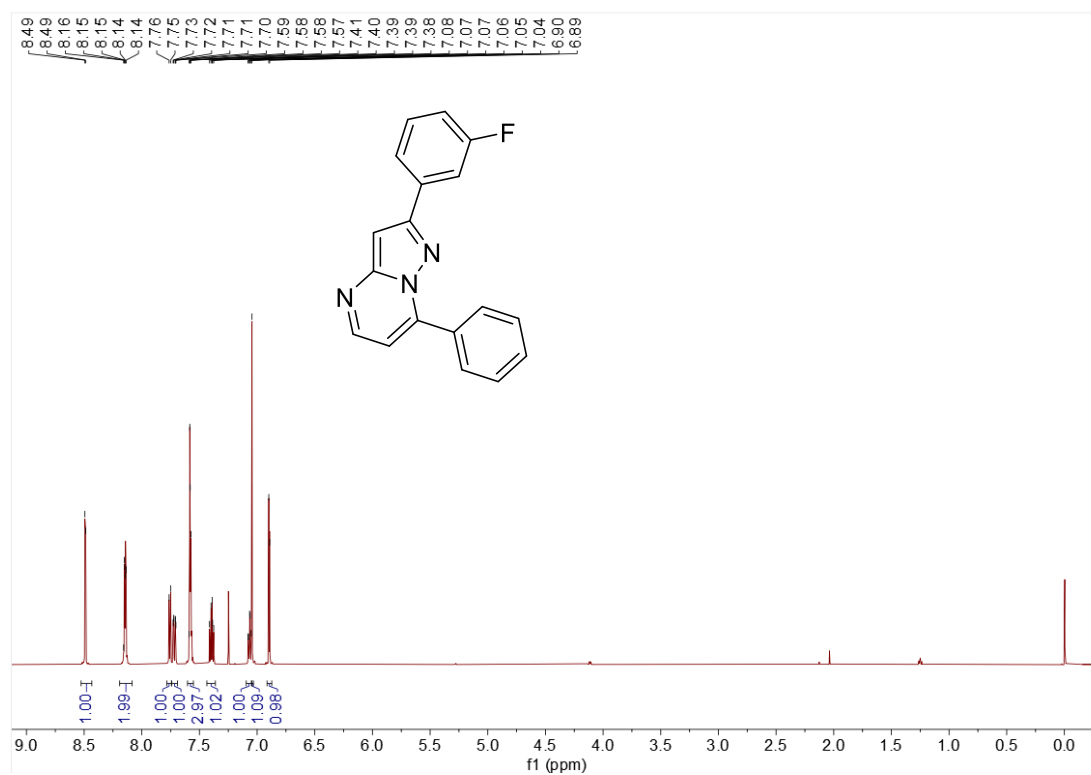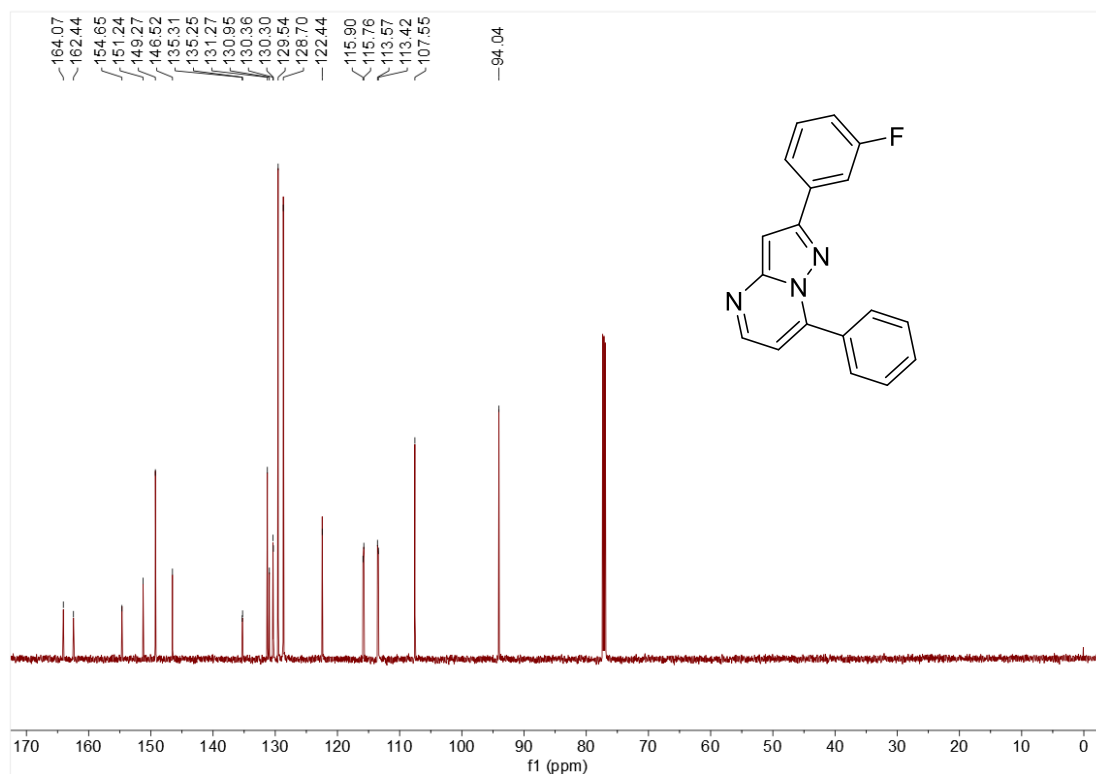

2-(4-fluorophenyl)-7-phenylpyrazolo[1,5-a]pyrimidine (**3i**)

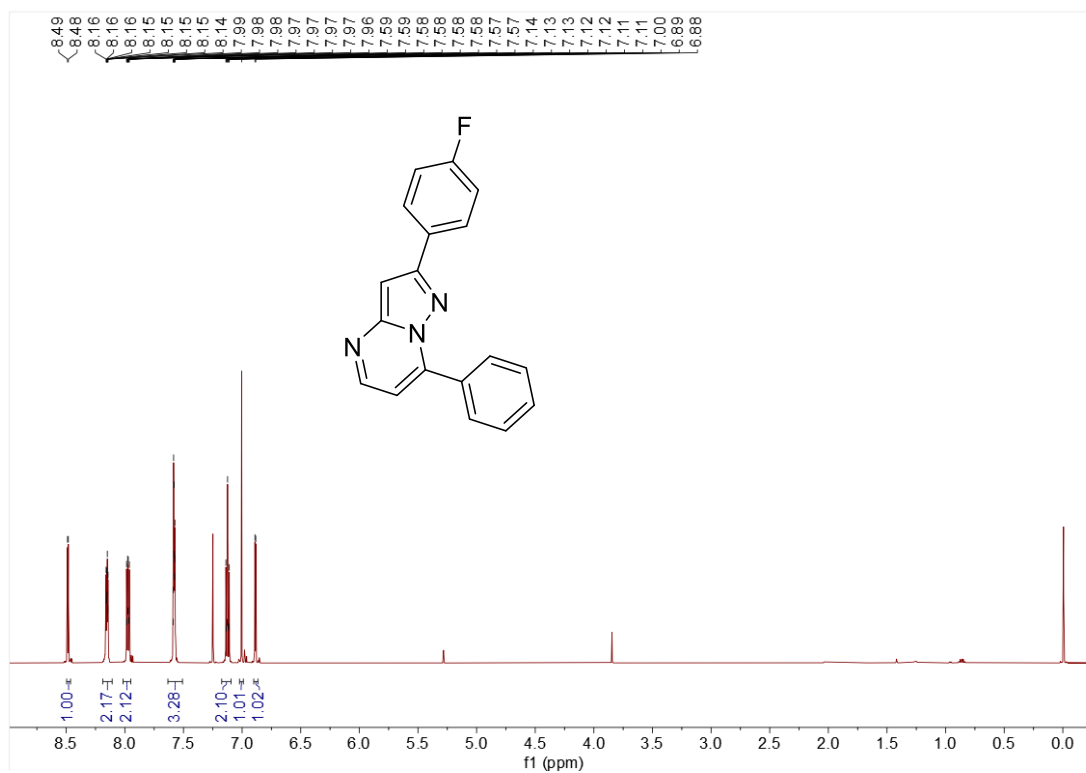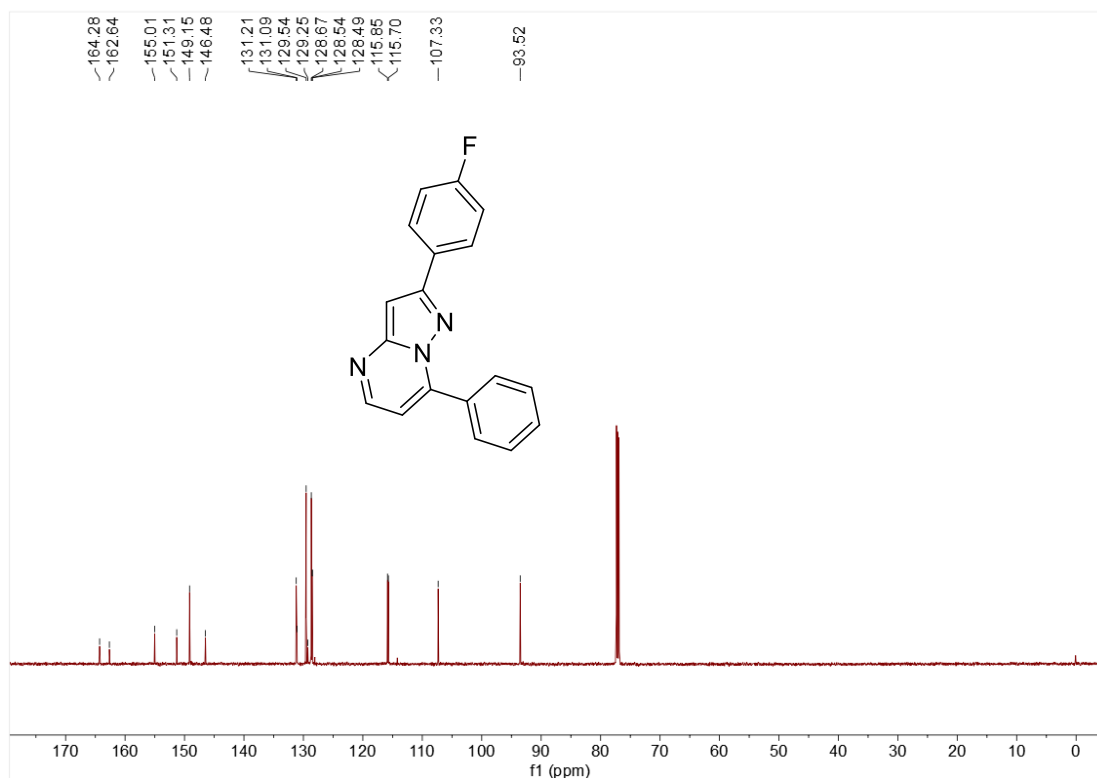

2-(4-chlorophenyl)-7-phenylpyrazolo[1,5-a]pyrimidine (**3j**)

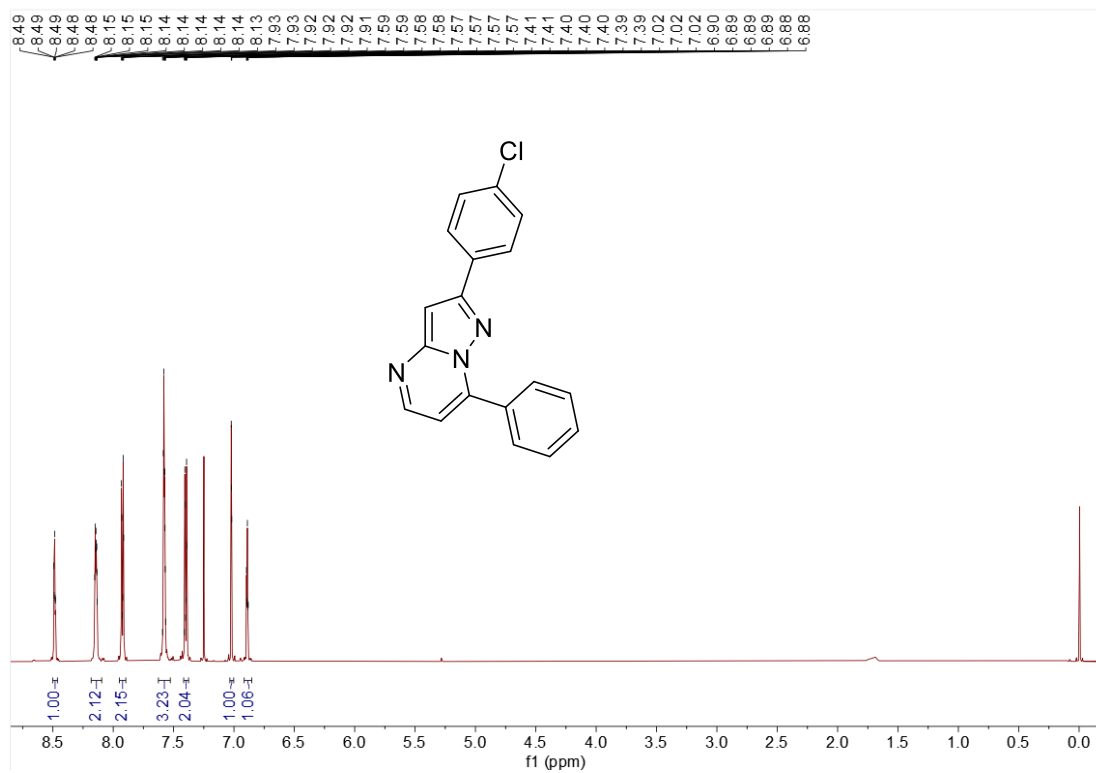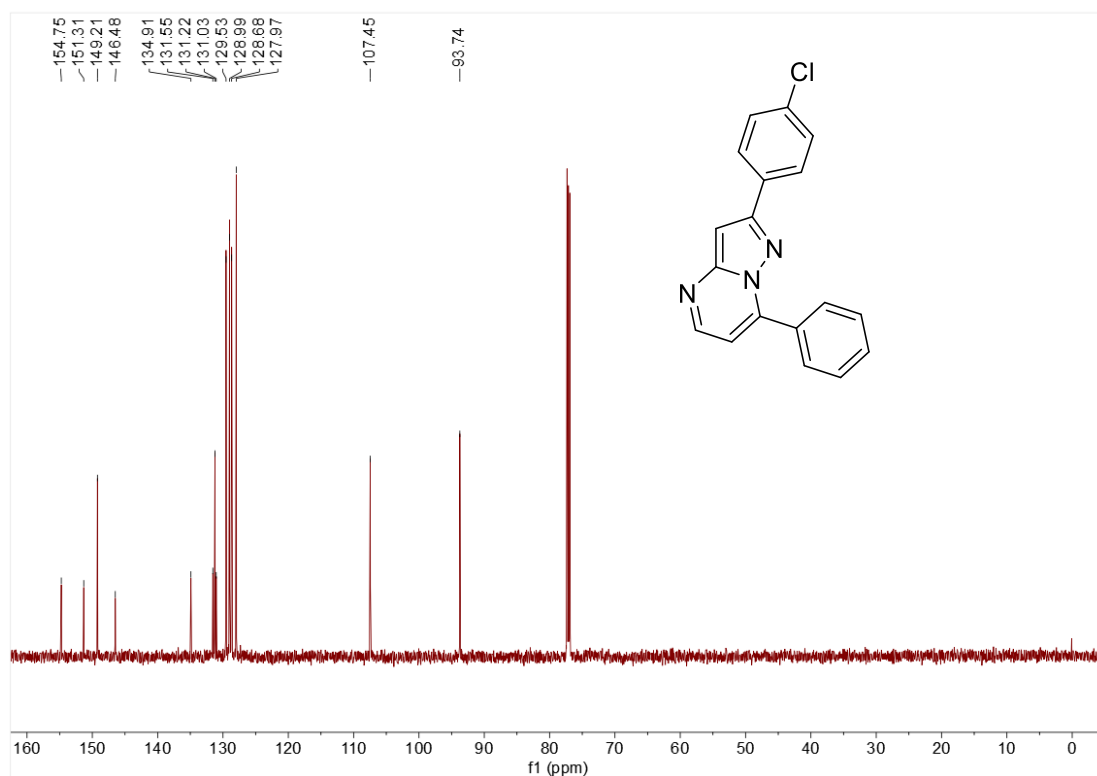

2-(4-bromophenyl)-7-phenylpyrazolo[1,5-a]pyrimidine (**3k**)

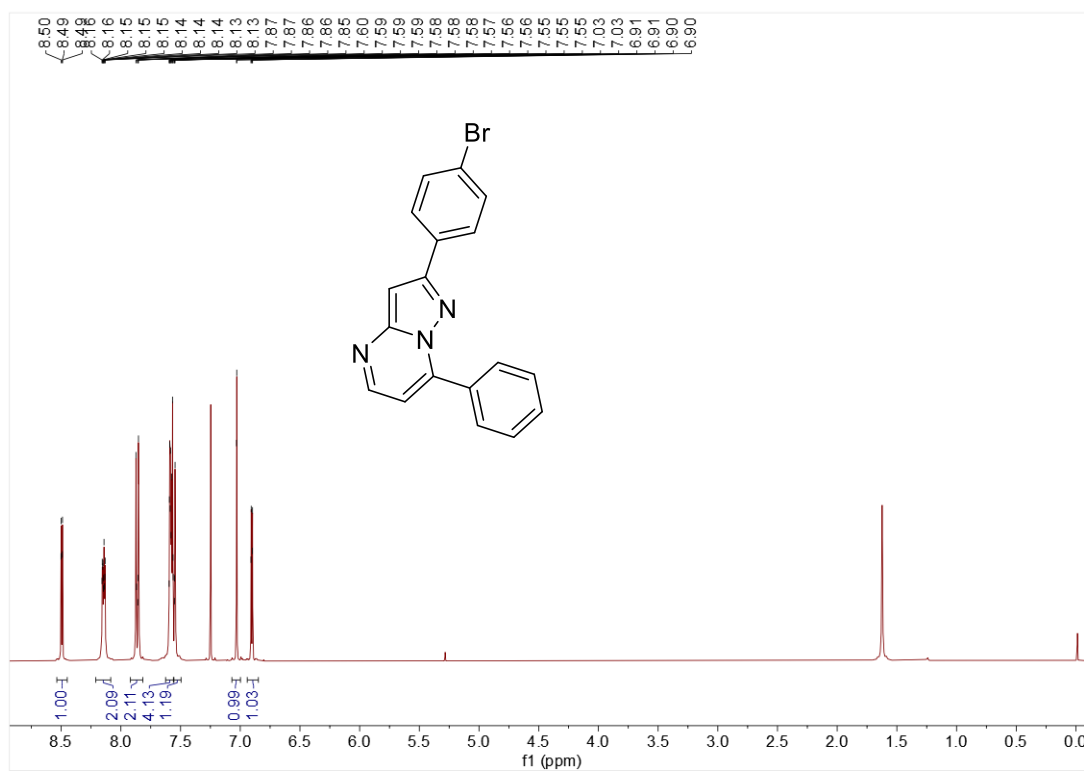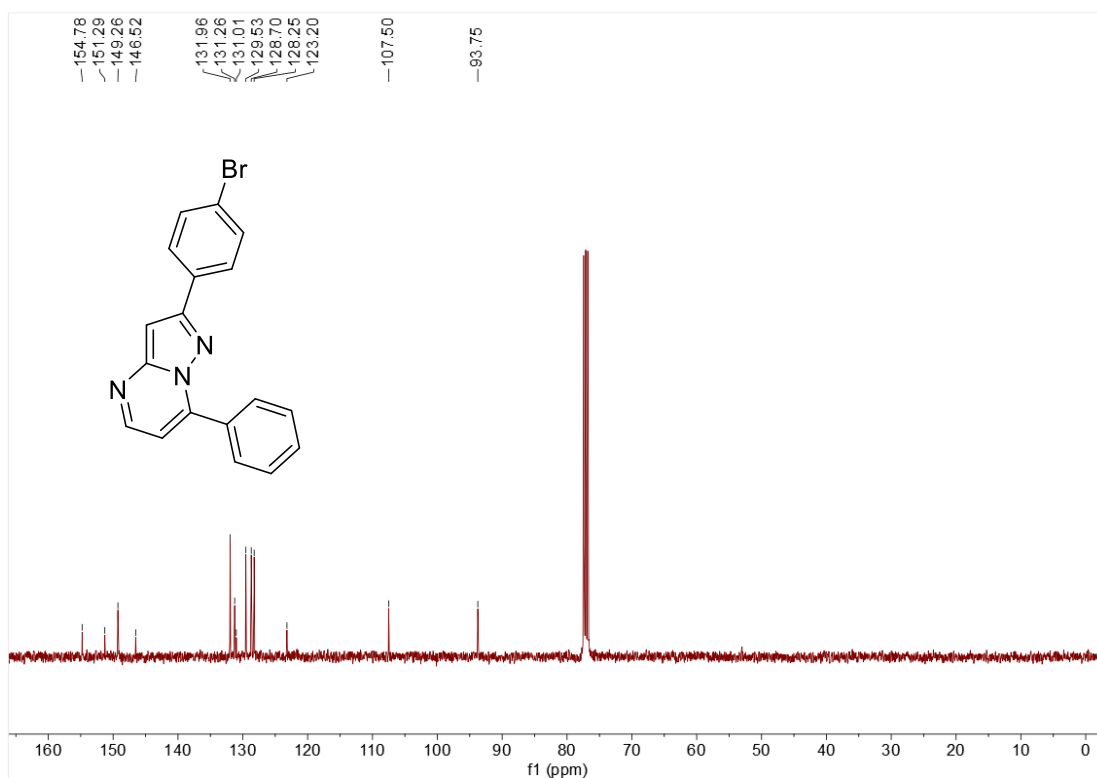

7-phenyl-2-(4-(trifluoromethyl)phenyl)pyrazolo[1,5-a]pyrimidine (**31**)

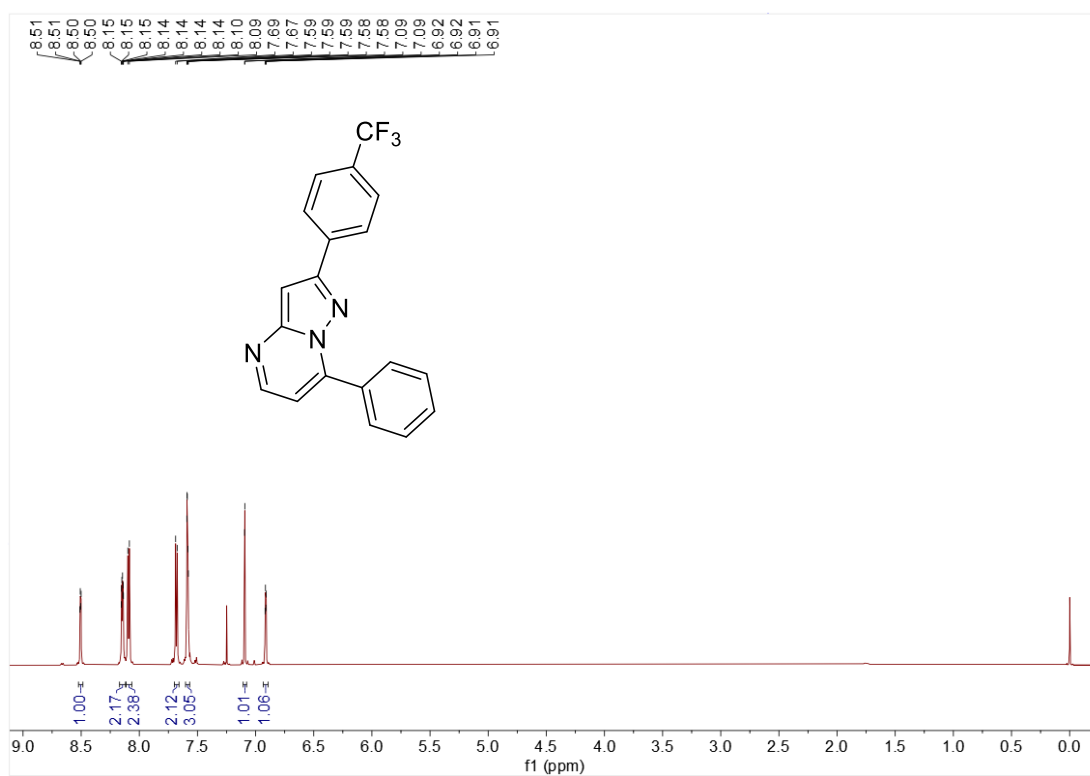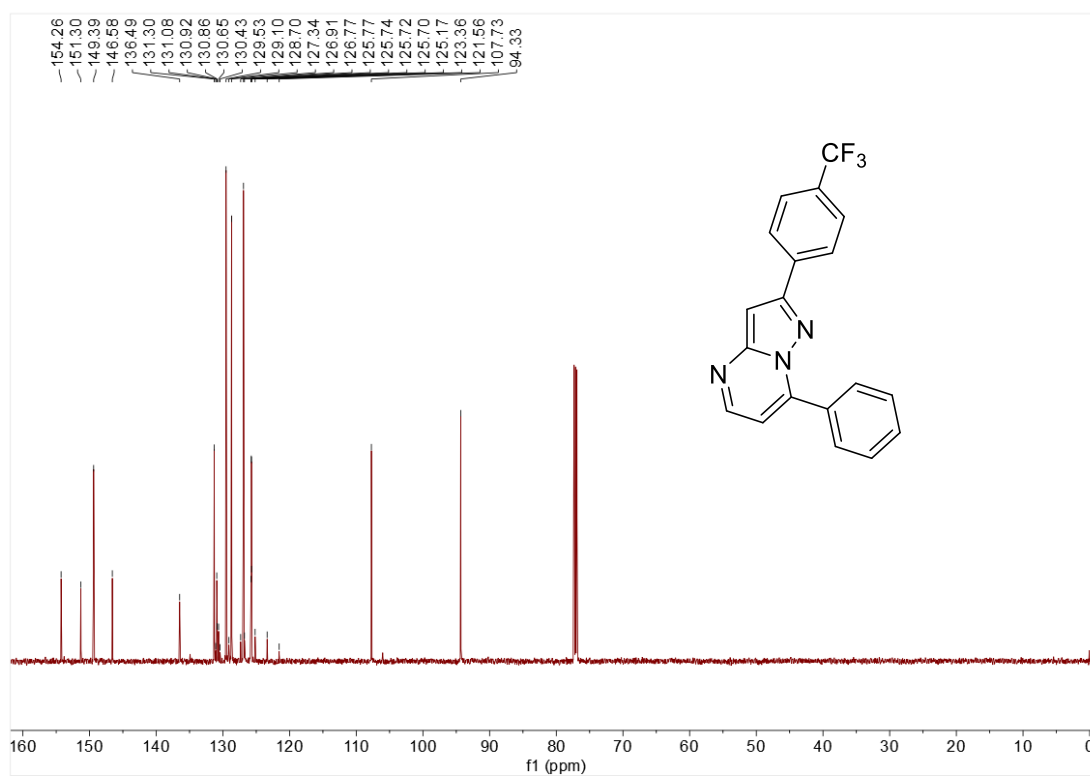



2-(naphthalen-2-yl)-7-phenylpyrazolo[1,5-a]pyrimidine (**3m**)

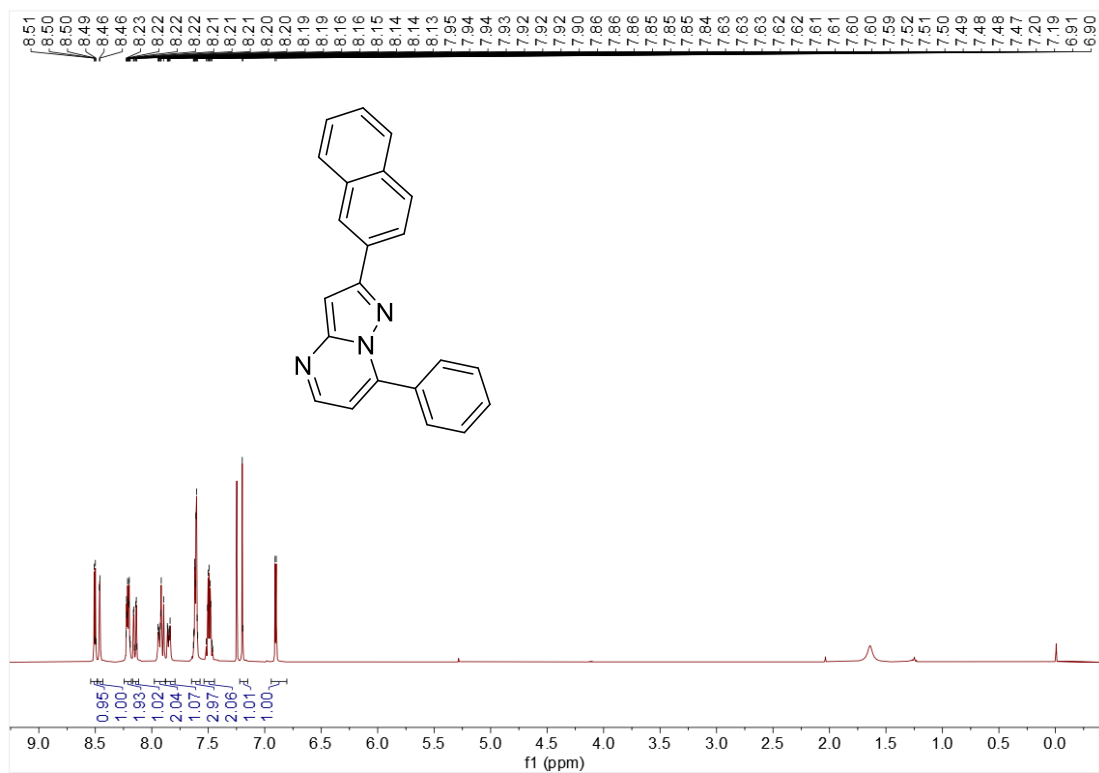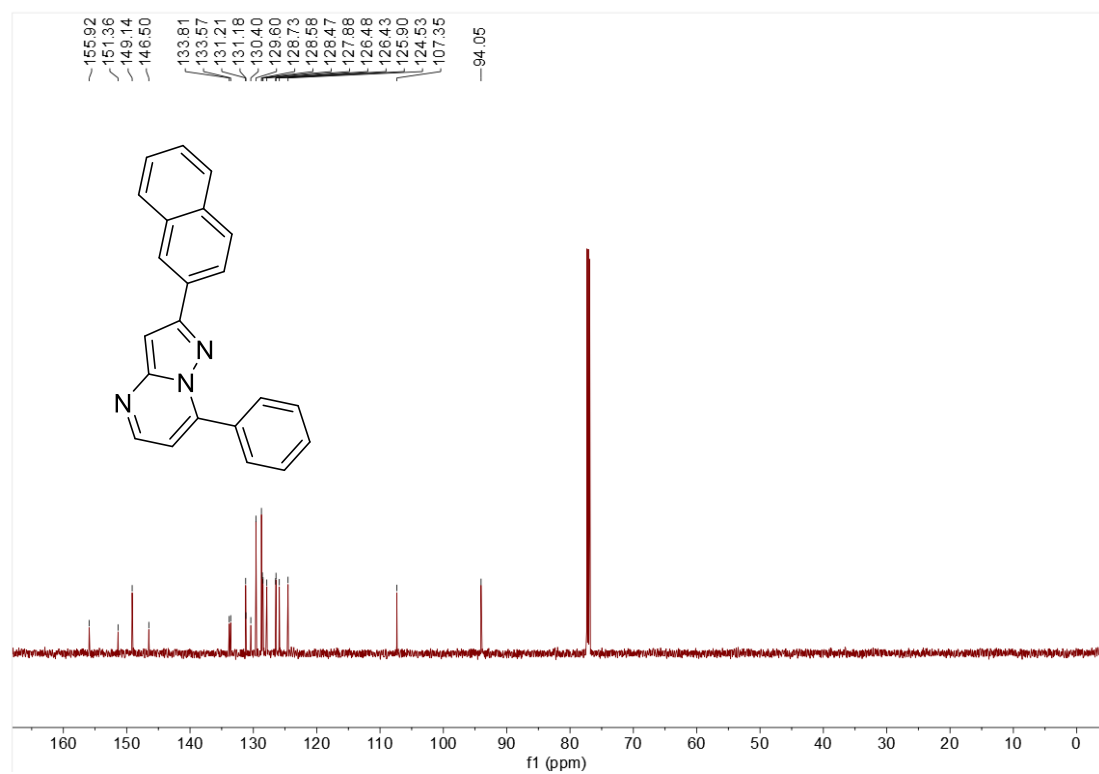

7-phenyl-2-(thiophen-2-yl)pyrazolo[1,5-a]pyrimidine (**3n**)

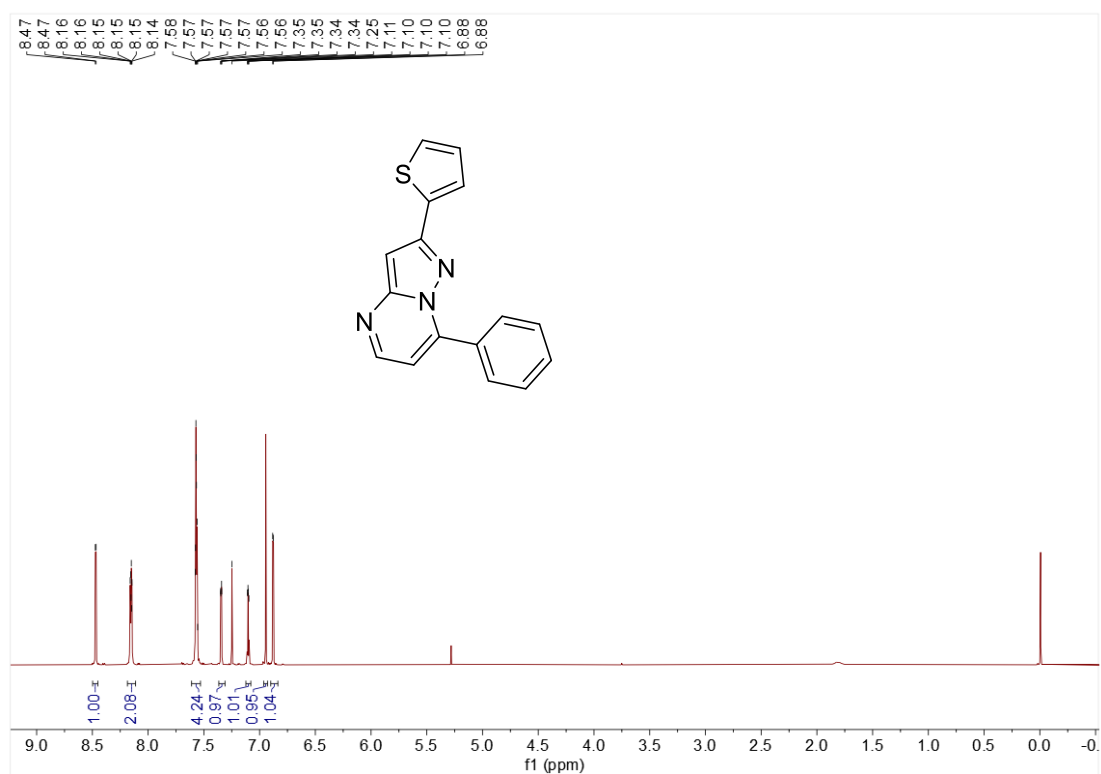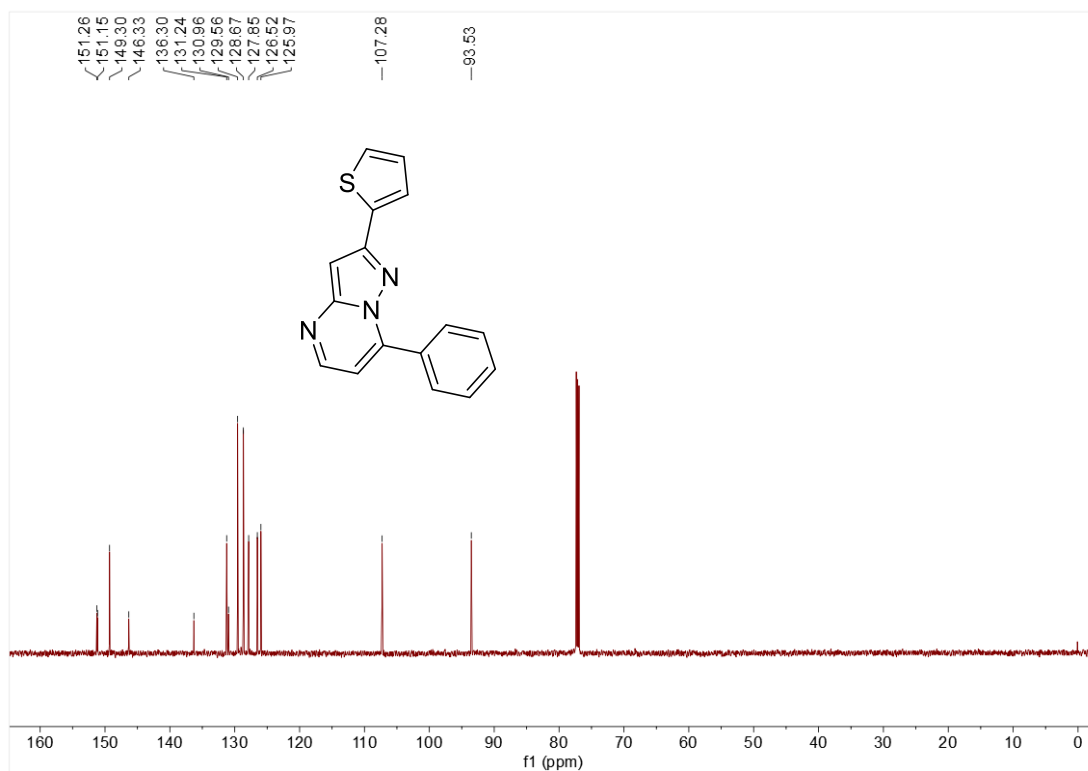

2-(furan-2-yl)-7-phenylpyrazolo[1,5-a]pyrimidine (**30**)

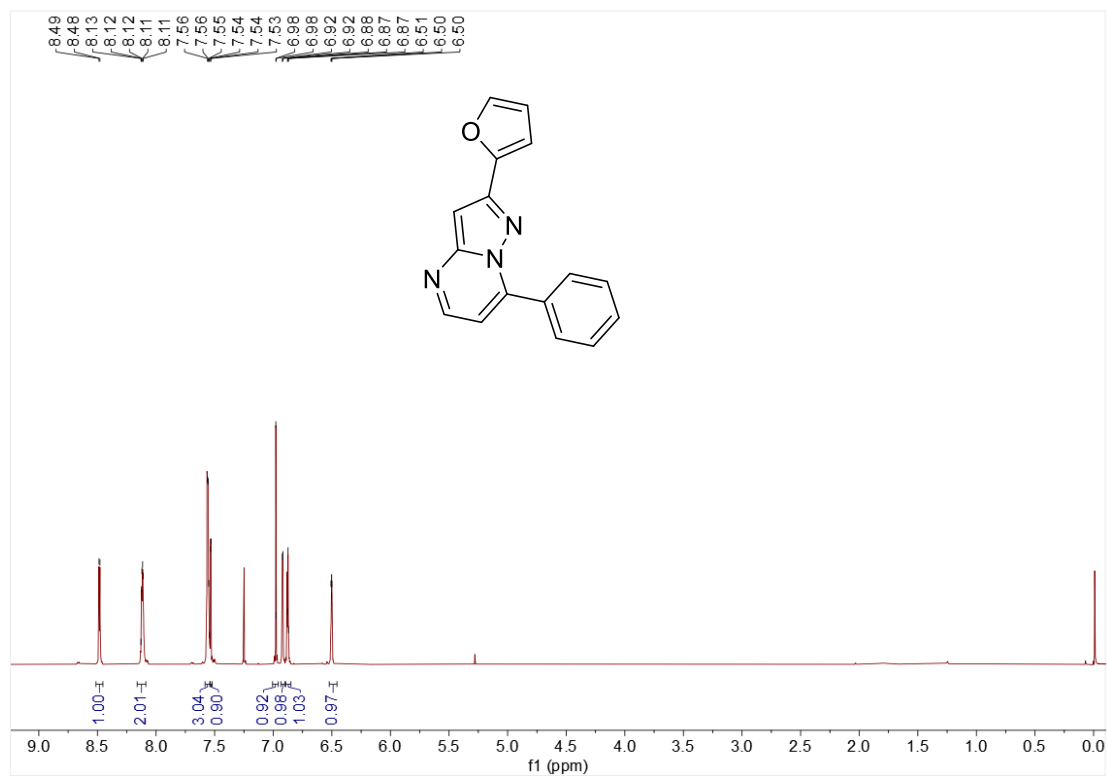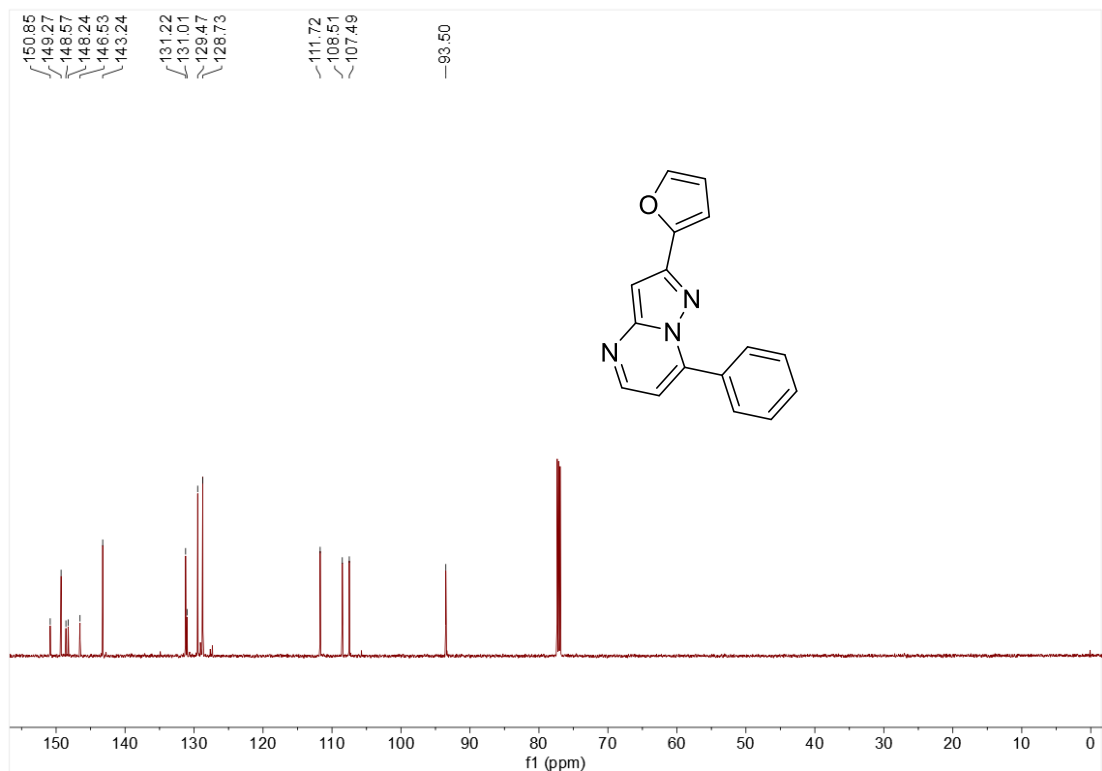

7-phenylpyrazolo[1,5-a]pyrimidine (**3p**)

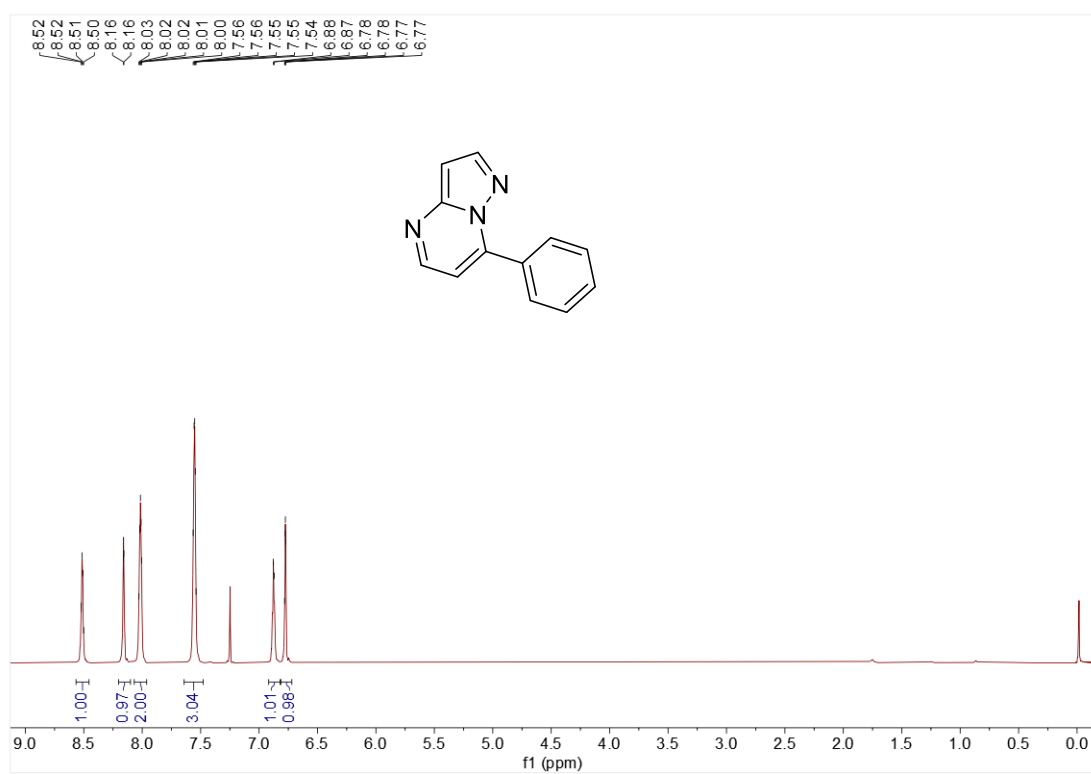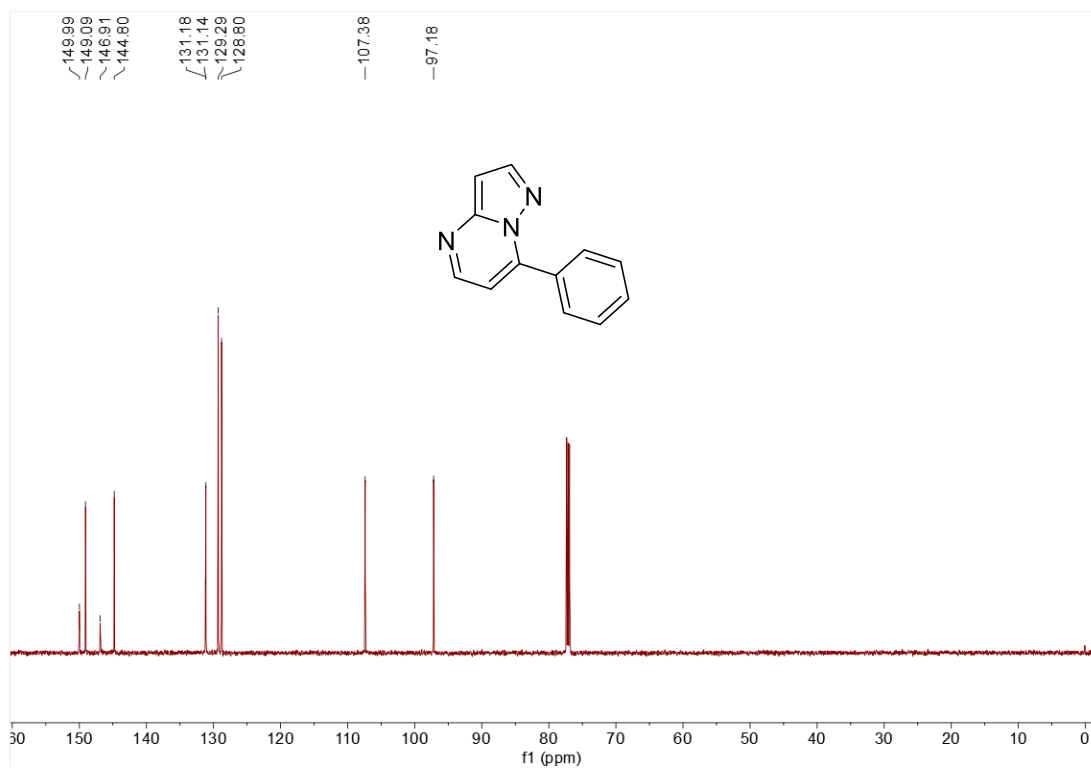

2-(*tert*-butyl)-7-phenylpyrazolo[1,5-*a*]pyrimidine (**3q**)

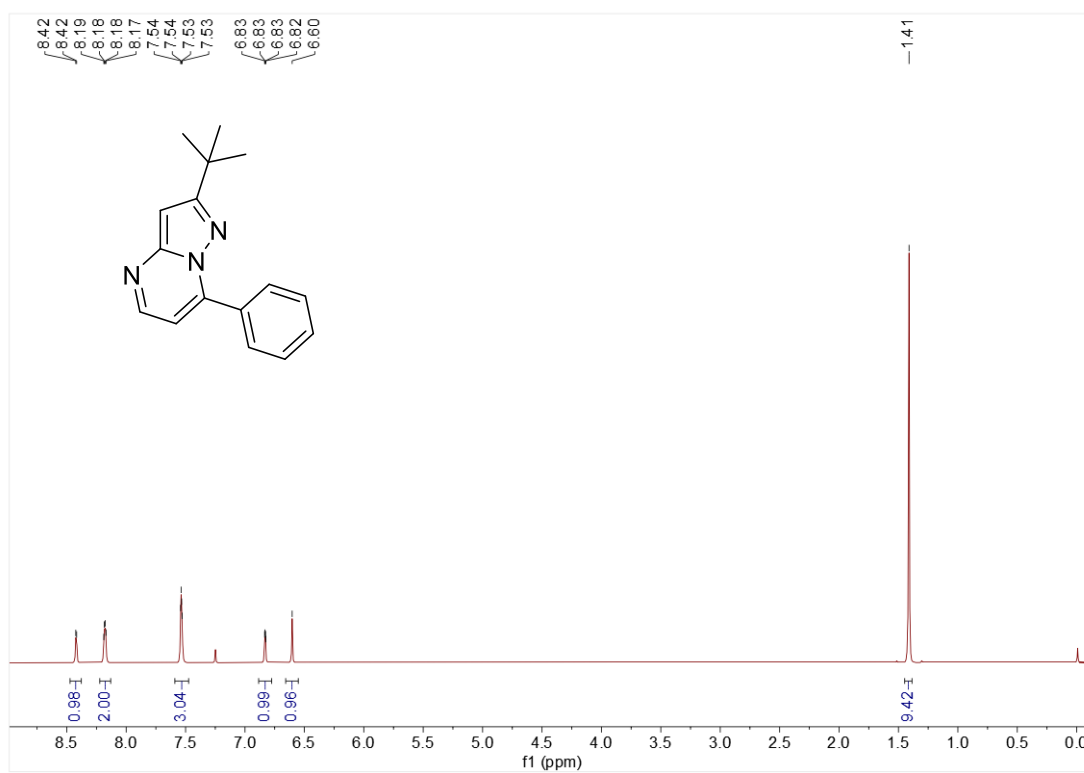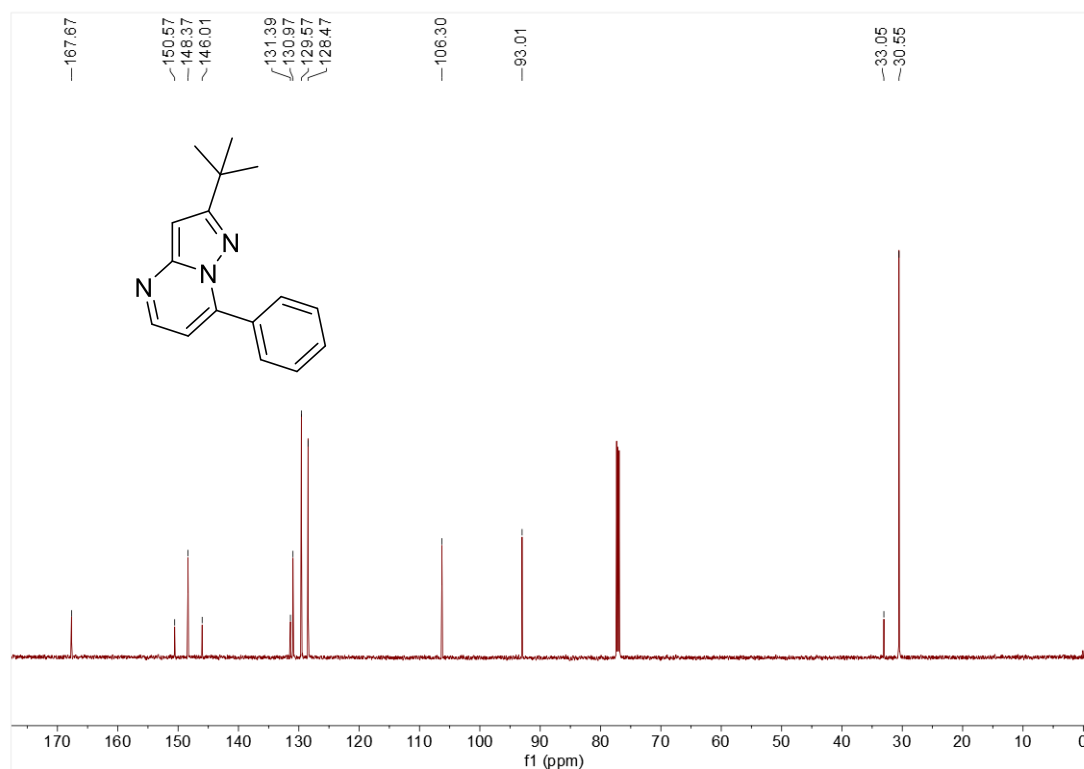

7-phenyl-4,5-dihydropyrazolo[1,5-*a*]pyrimidine-3-carbonitrile (**5a**)

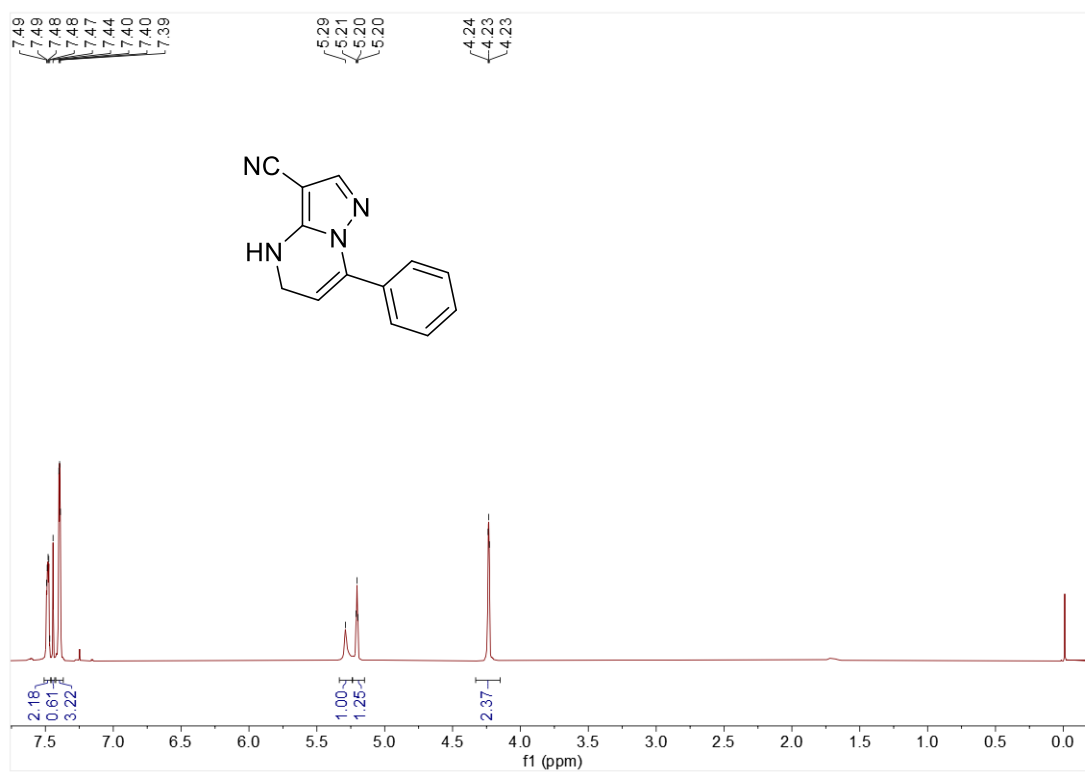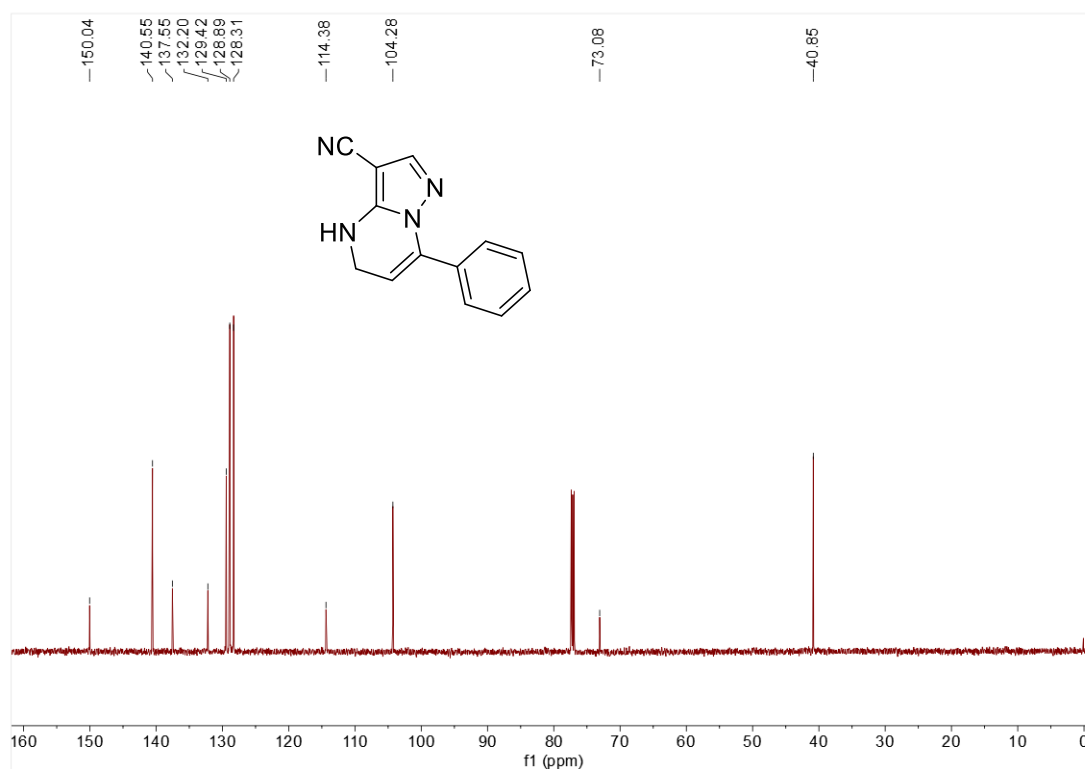

7-(2-methoxyphenyl)-4,5-dihydropyrazolo[1,5-a]pyrimidine-3-carbonitrile (**5b**)

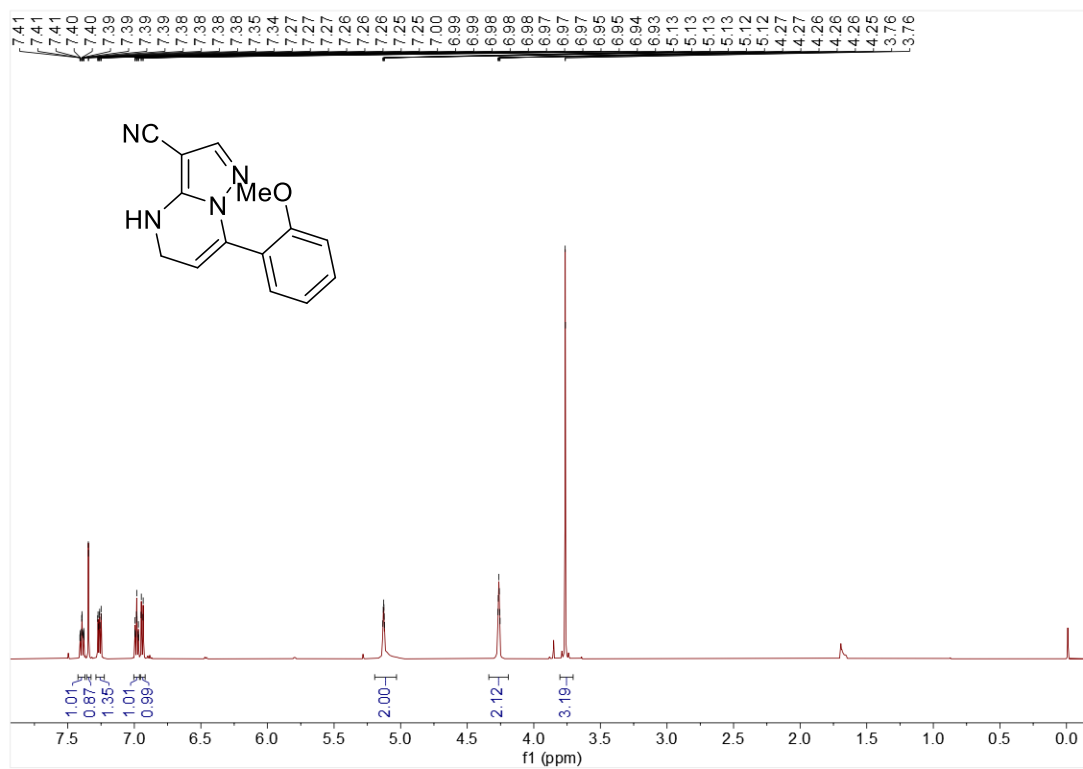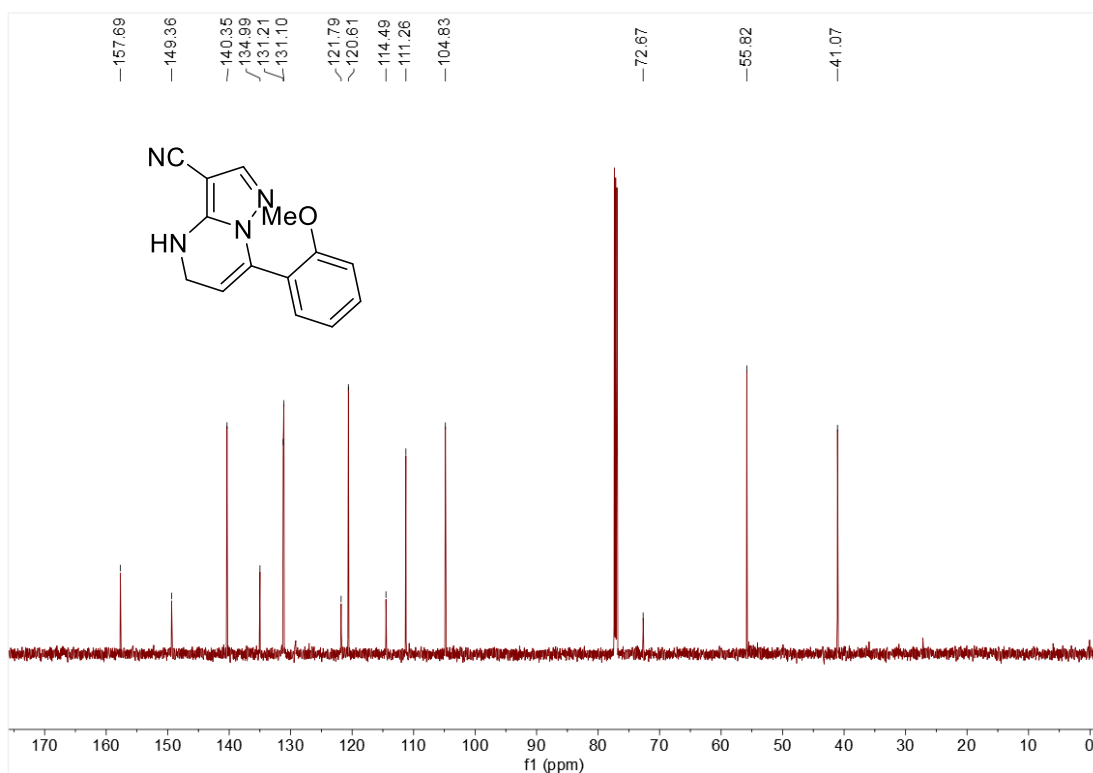

7-(*m*-tolyl)-4,5-dihydropyrazolo[1,5-*a*]pyrimidine-3-carbonitrile (**5c**)

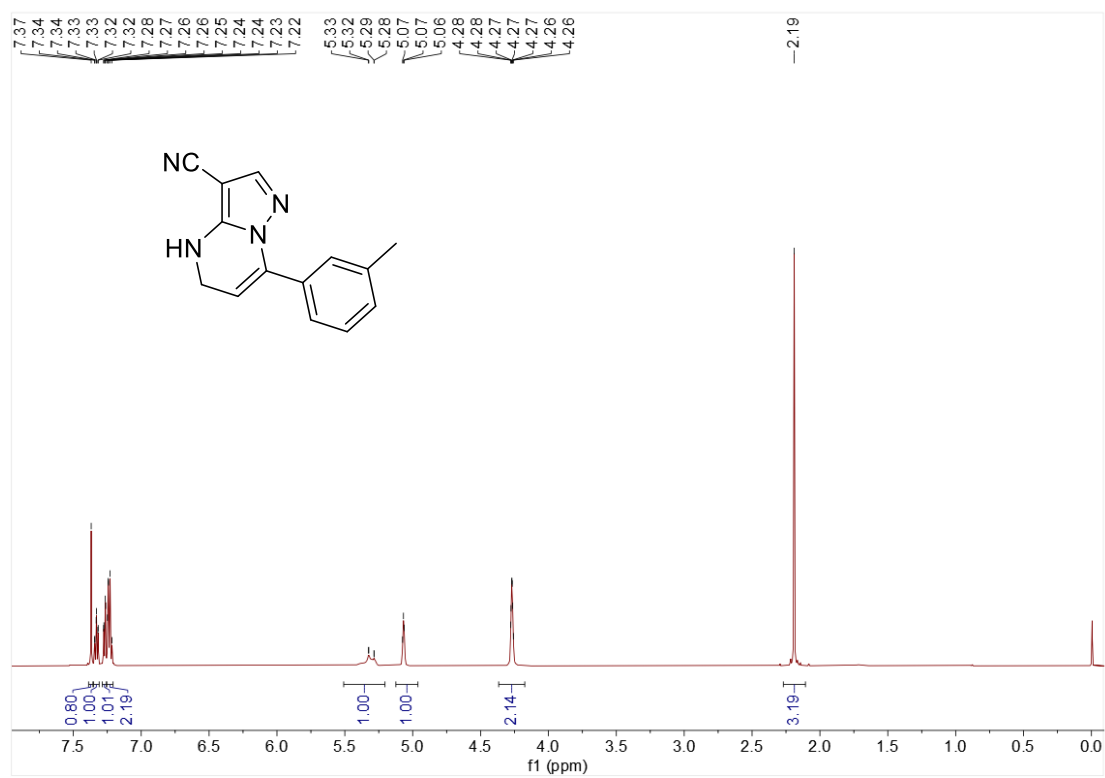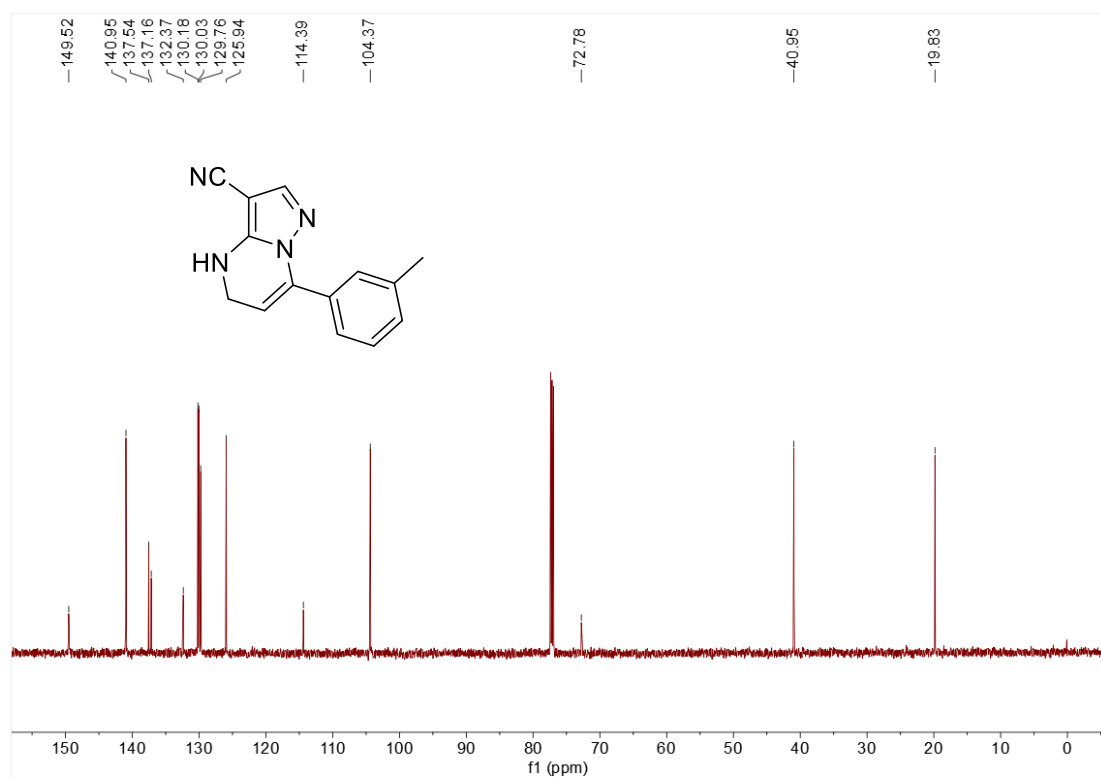



7-(3-methoxyphenyl)-4,5-dihydropyrazolo[1,5-*a*]pyrimidine-3-carbonitrile (**5d**)

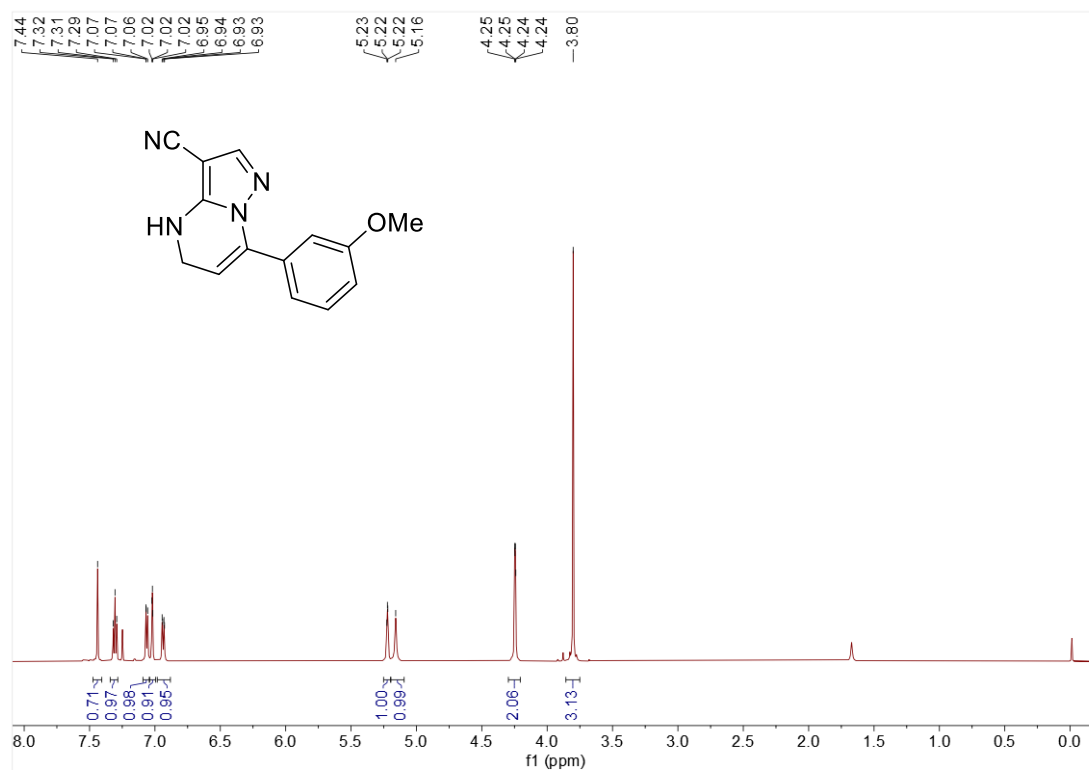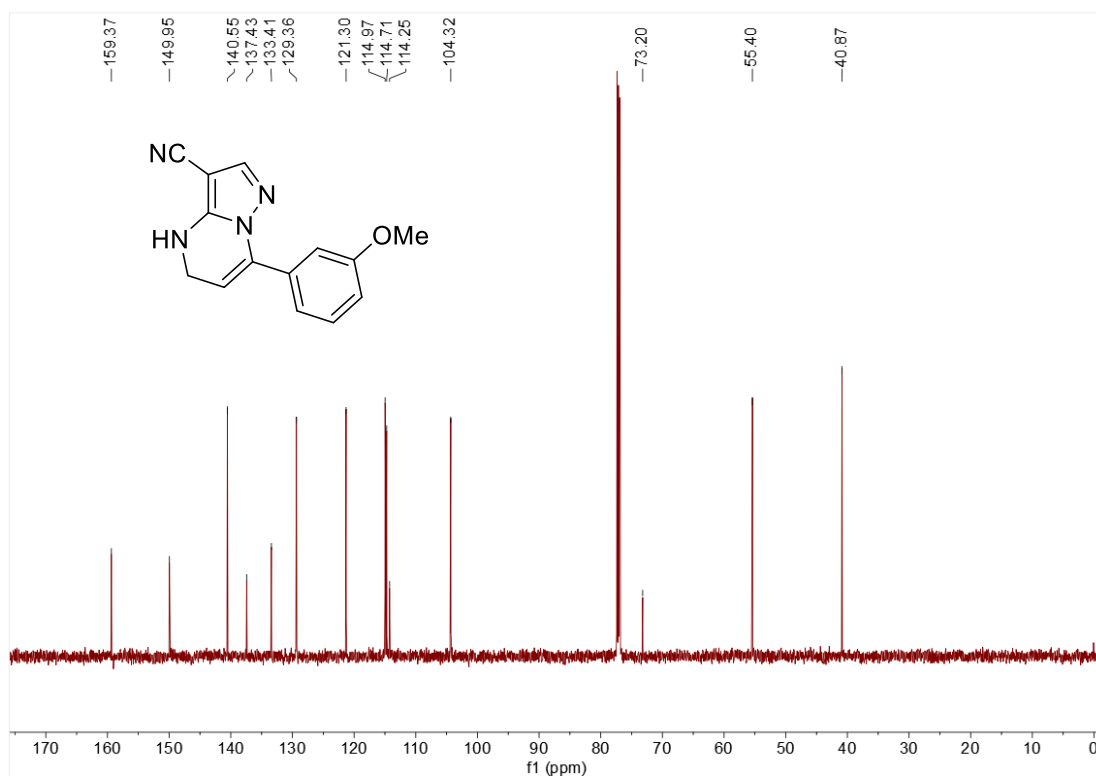

7-(*p*-tolyl)-4,5-dihydropyrazolo[1,5-*a*]pyrimidine-3-carbonitrile (**5e**)

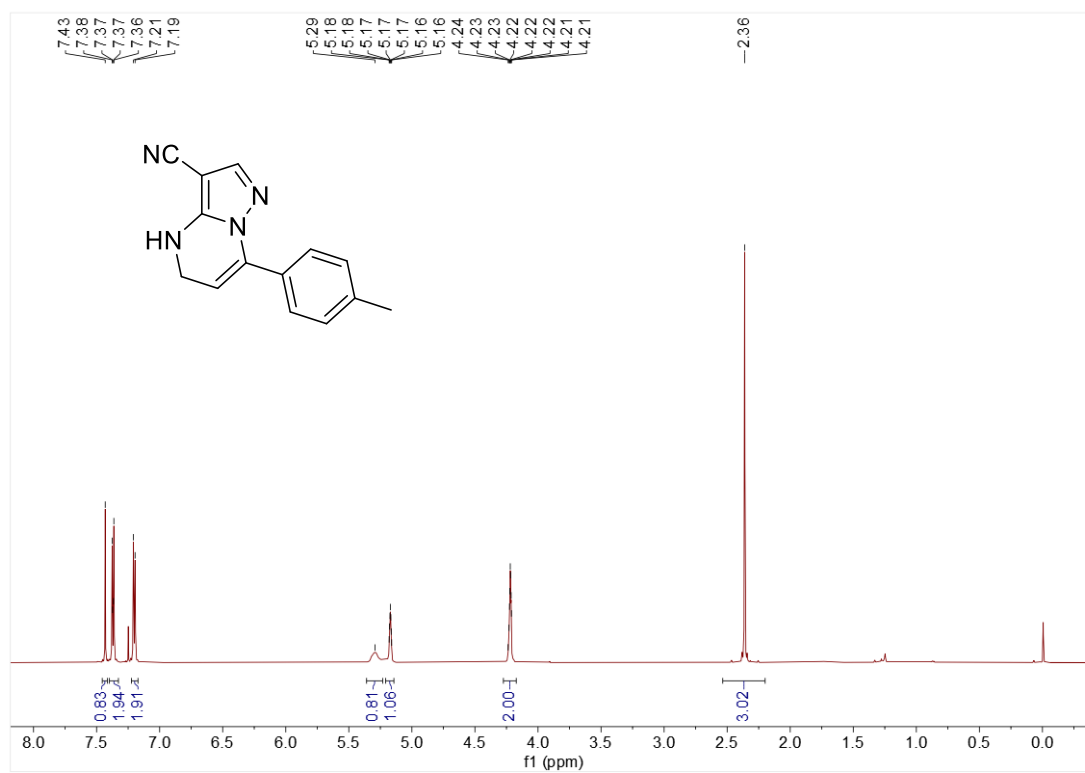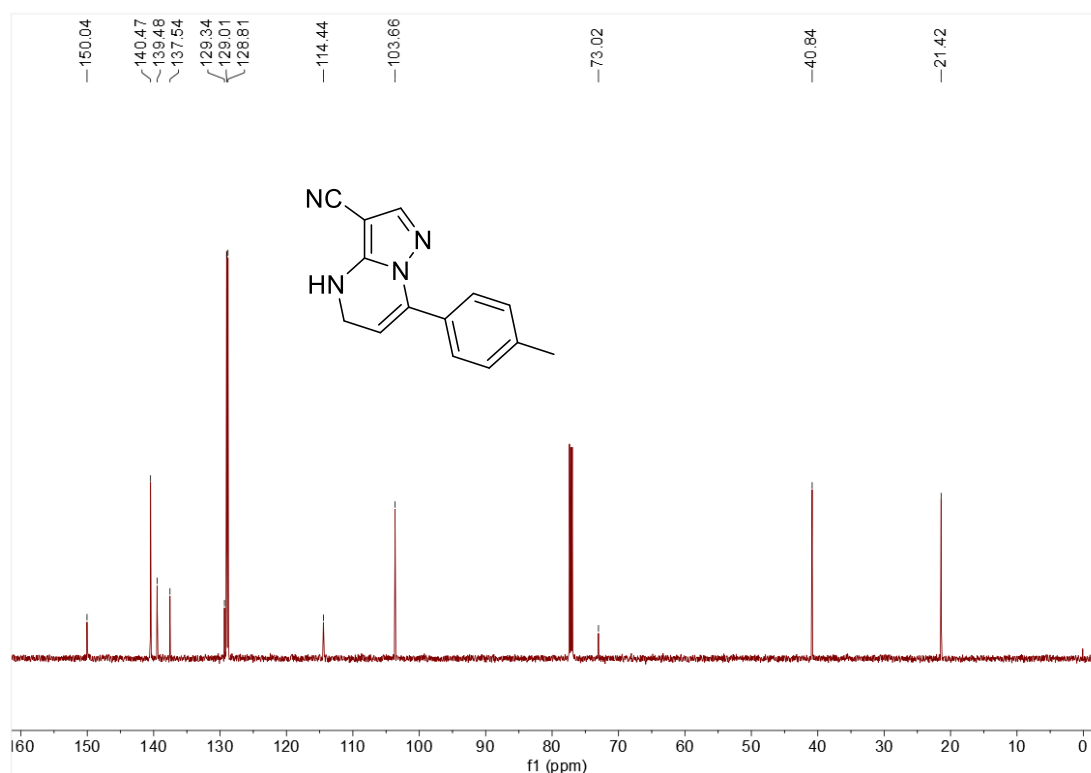

7-(4-(*tert*-butyl)phenyl)-4,5-dihydropyrazolo[1,5-*a*]pyrimidine-3-carbonitrile (**5f**)

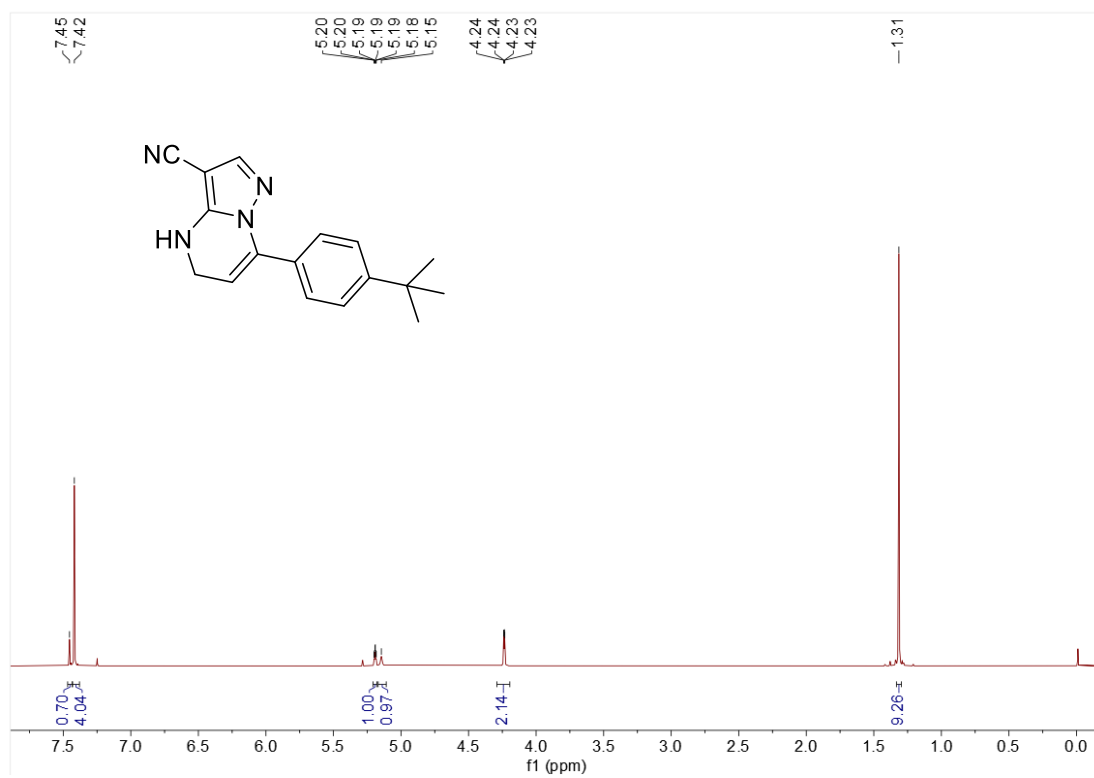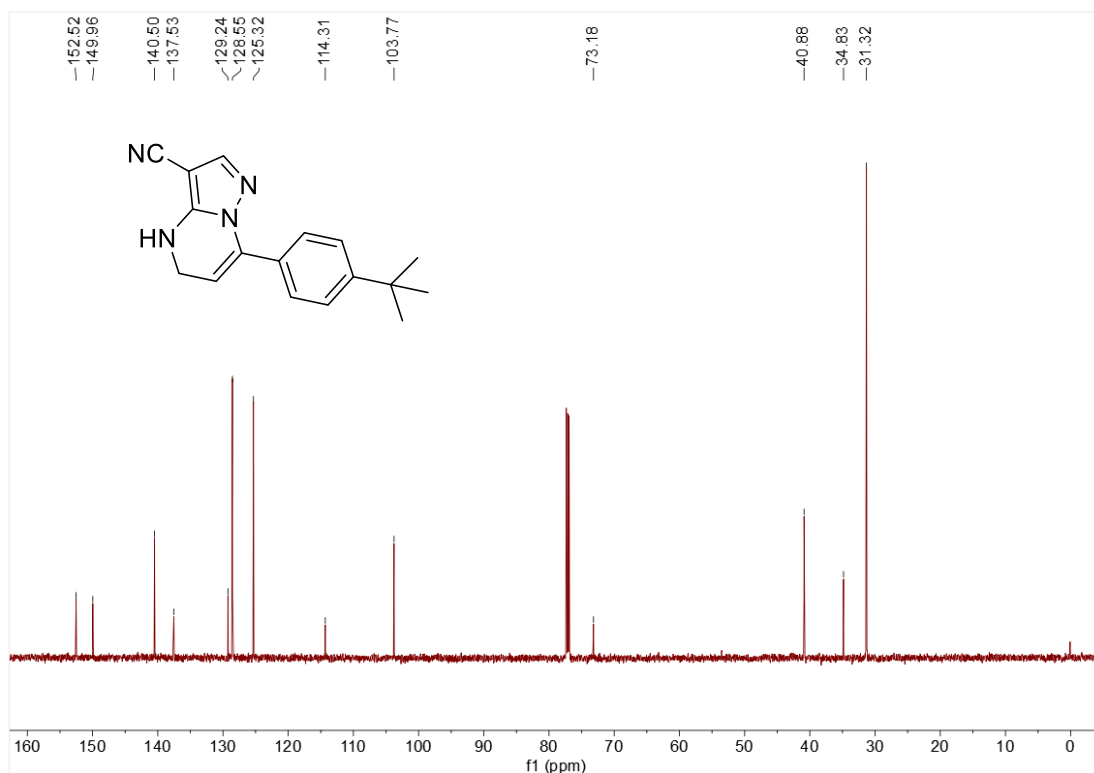

7-(3-chlorophenyl)-4,5-dihydropyrazolo[1,5-a]pyrimidine-3-carbonitrile (**5g**)

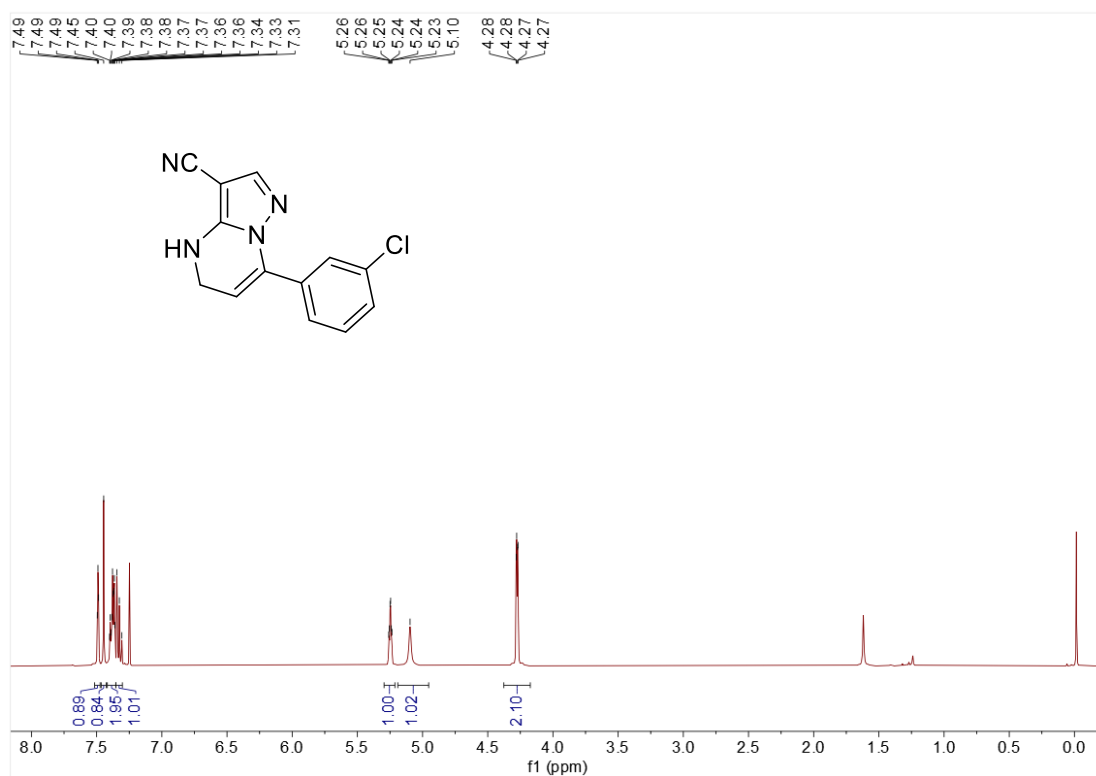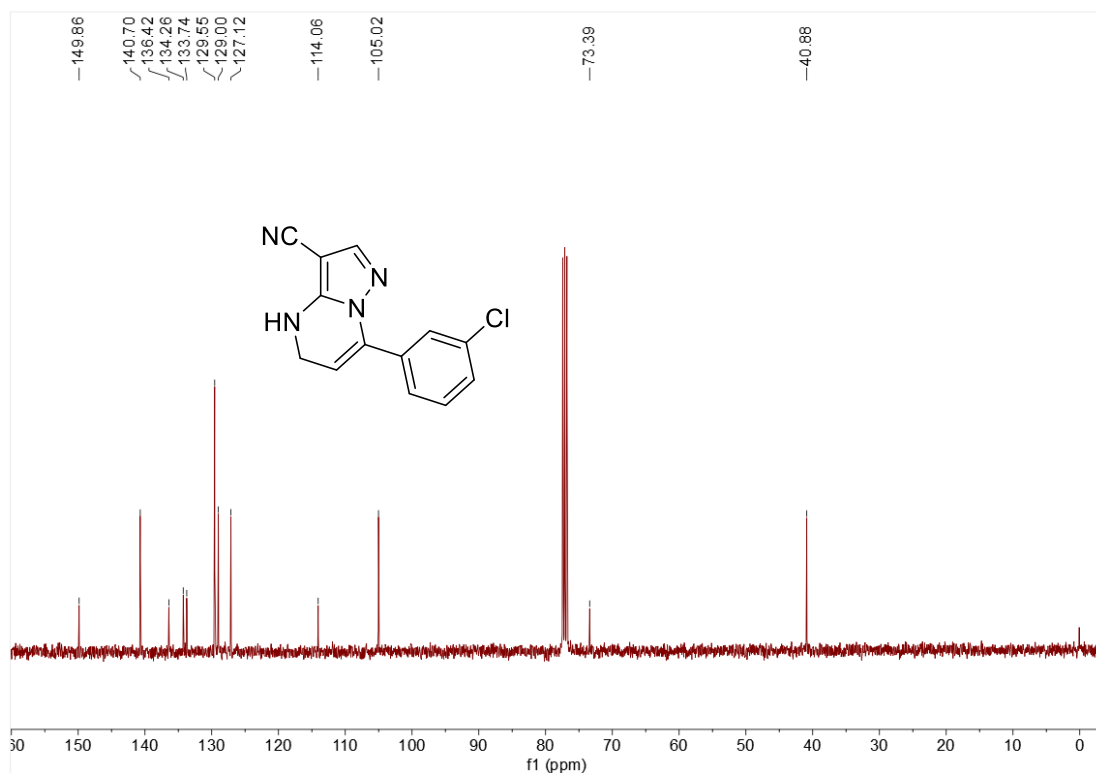

7-(3-fluorophenyl)-4,5-dihydropyrazolo[1,5-a]pyrimidine-3-carbonitrile (**5h**)

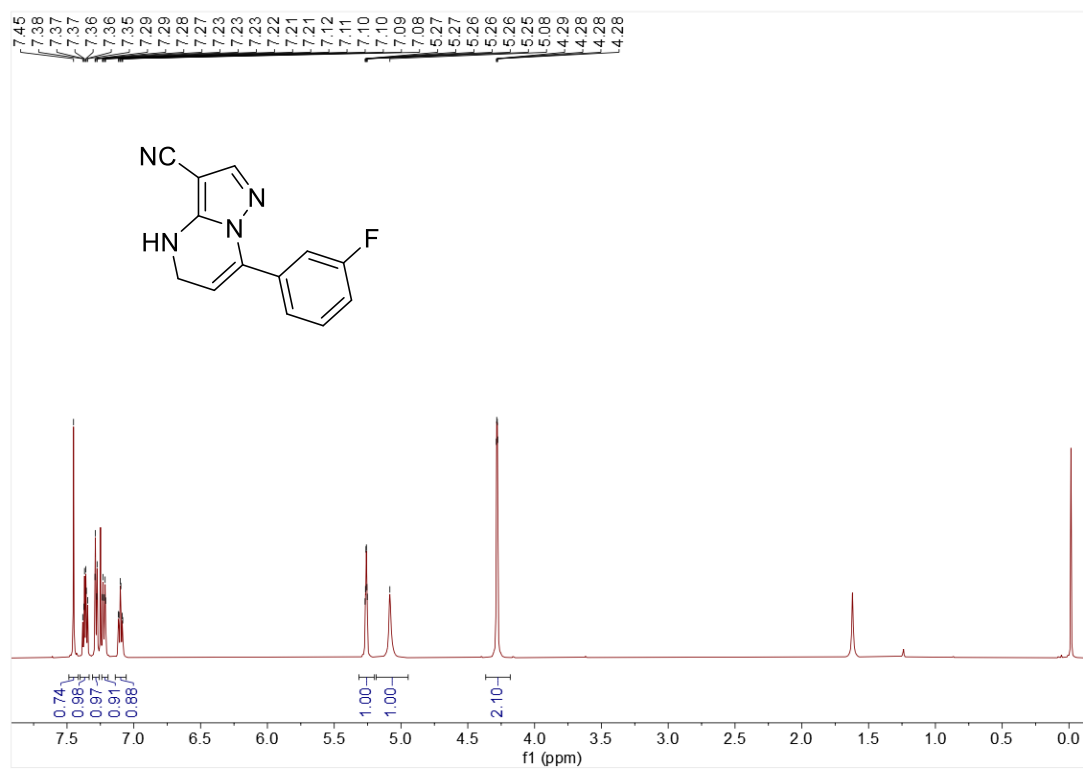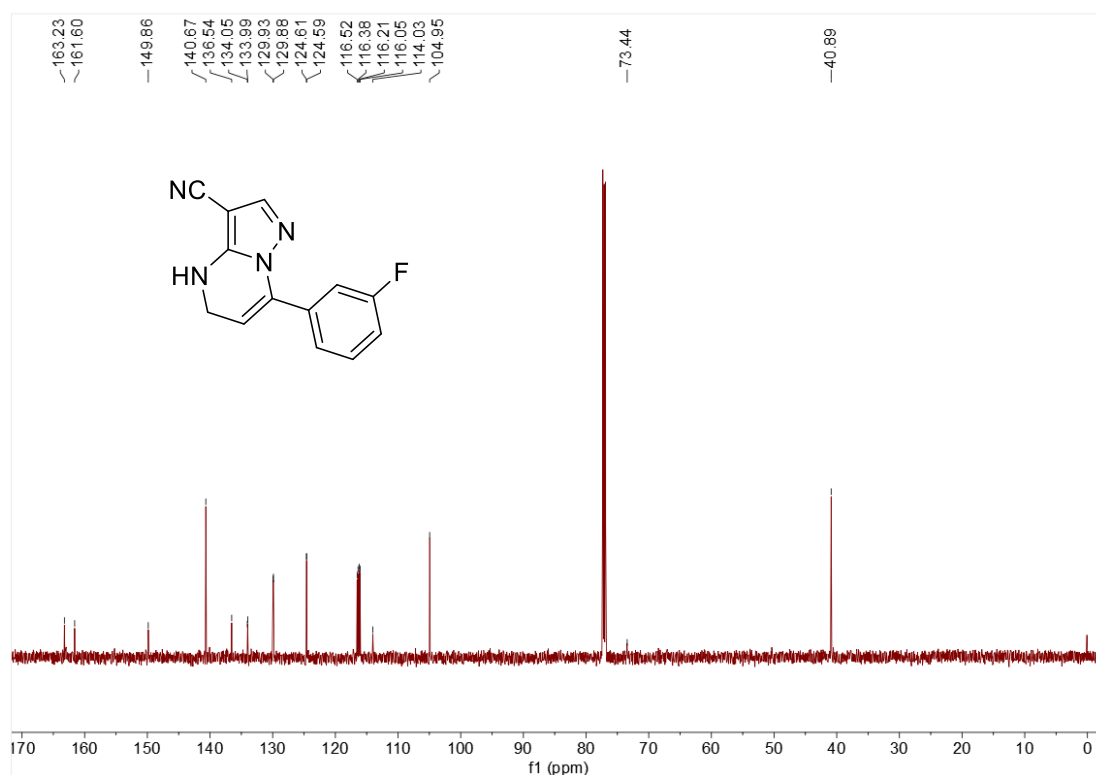

7-(4-fluorophenyl)-4,5-dihydropyrazolo[1,5-*a*]pyrimidine-3-carbonitrile (**5i**)

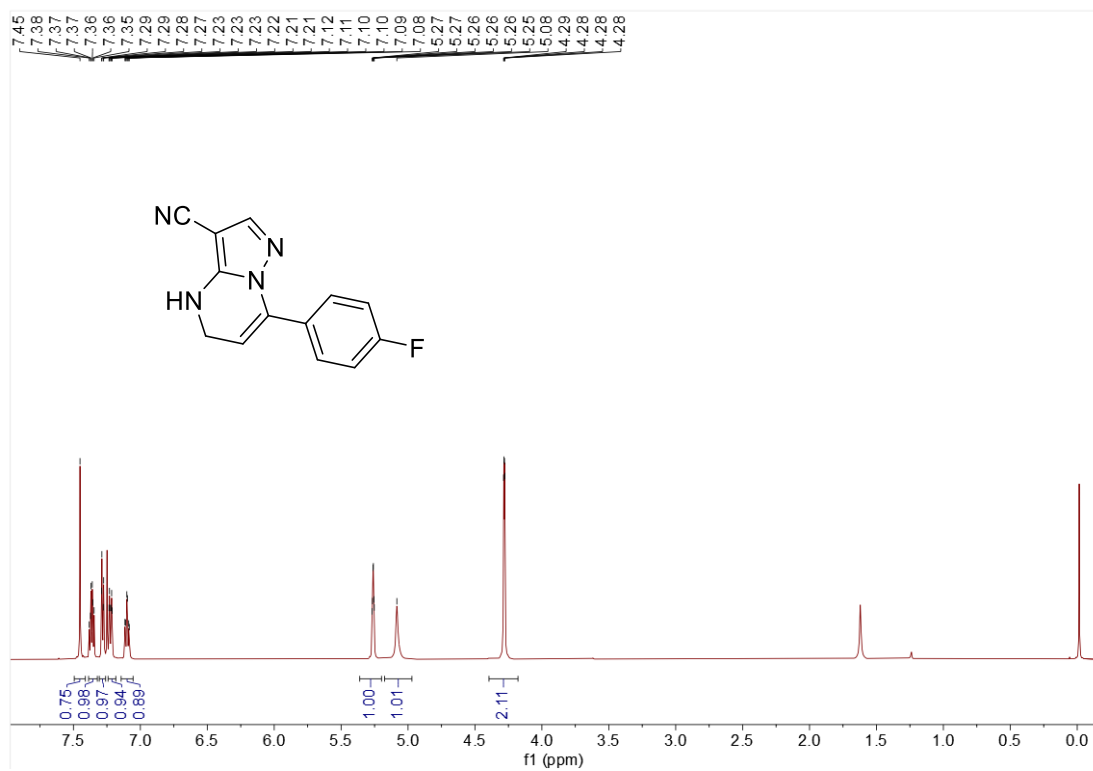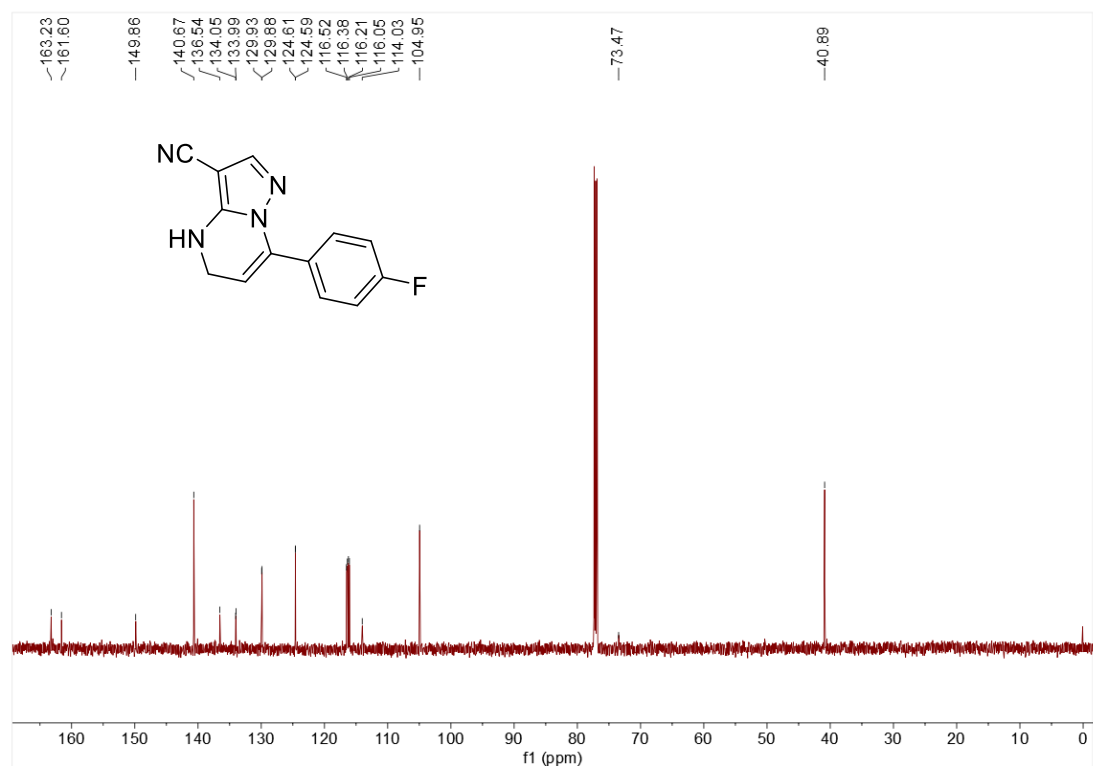

7-(4-bromophenyl)-4,5-dihydropyrazolo[1,5-a]pyrimidine-3-carbonitrile (**5j**)

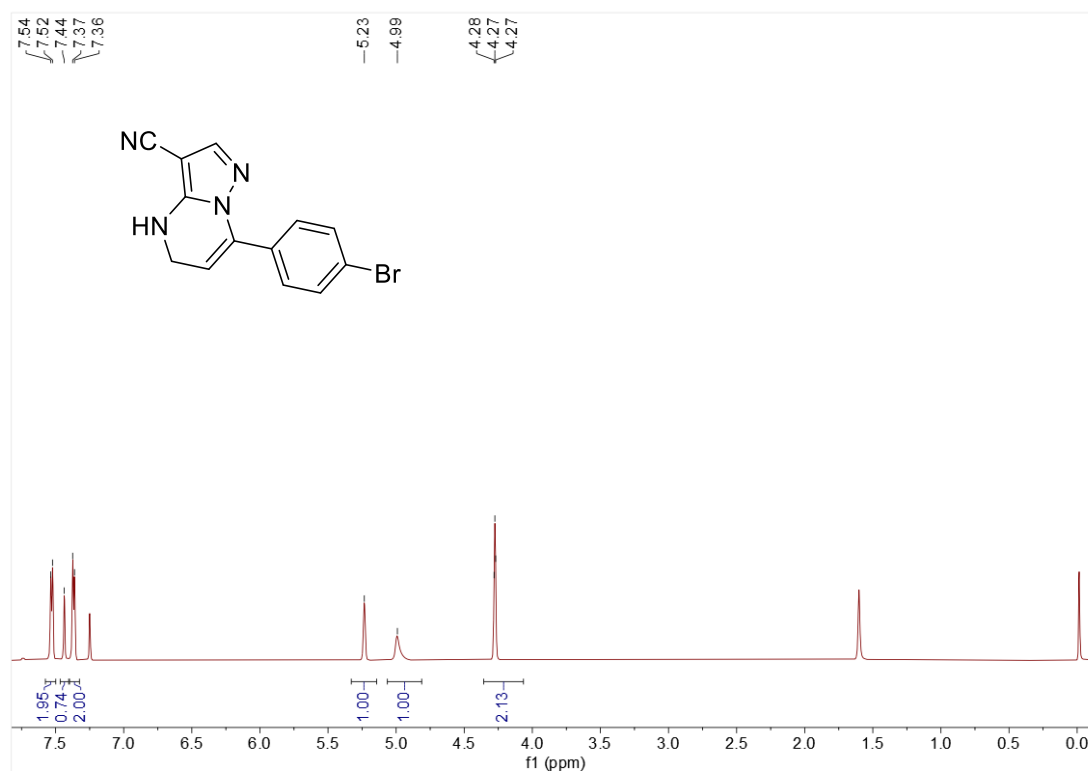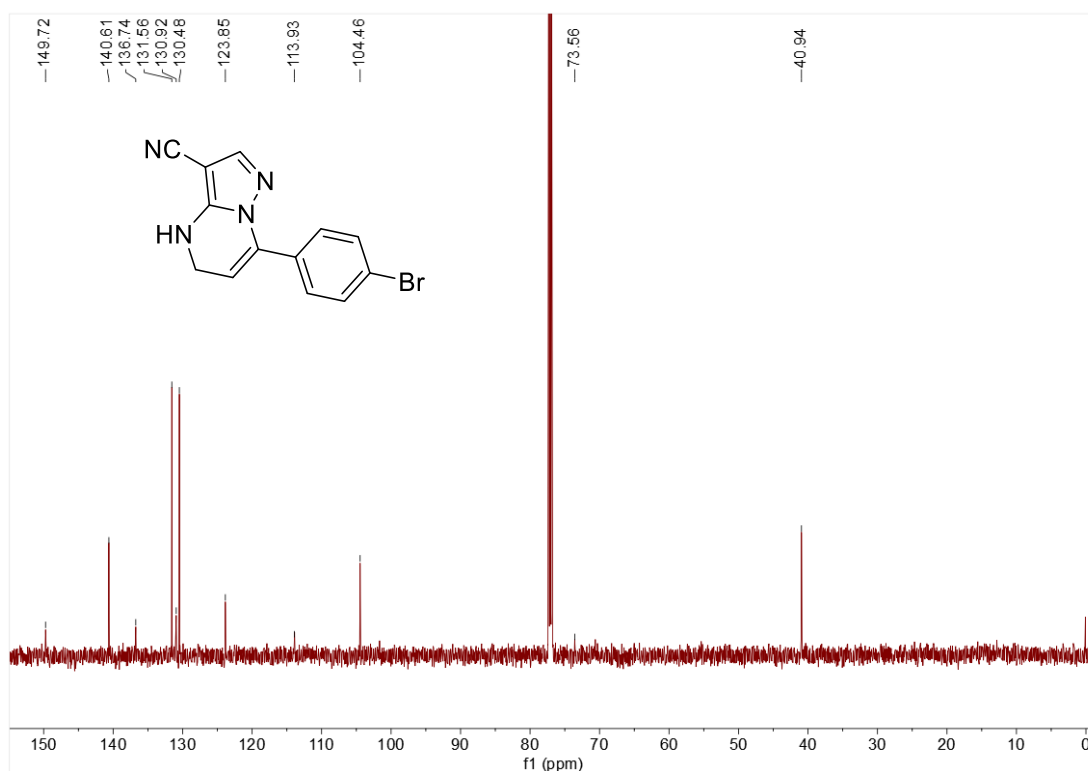

7-(pyridin-2-yl)-4,5-dihydropyrazolo[1,5-a]pyrimidine-3-carbonitrile (**5k**)

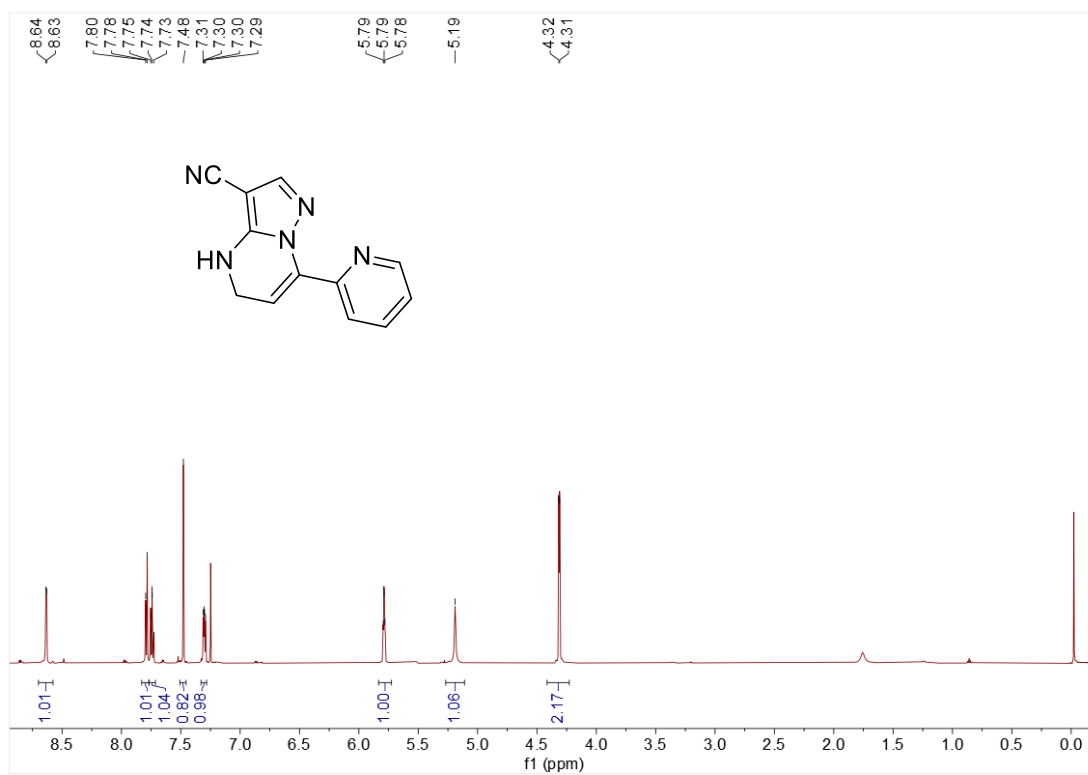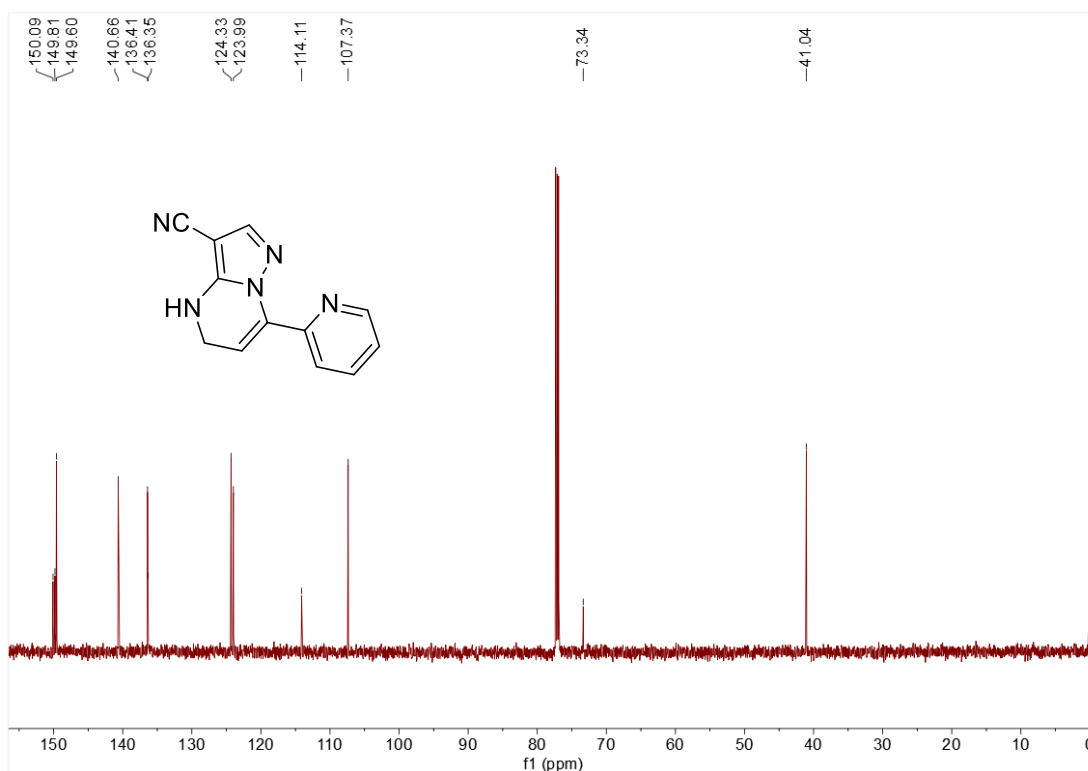



2,7-diphenyl-4,5-dihydropyrazolo[1,5-a]pyrimidine-3-carbonitrile (**5I**)

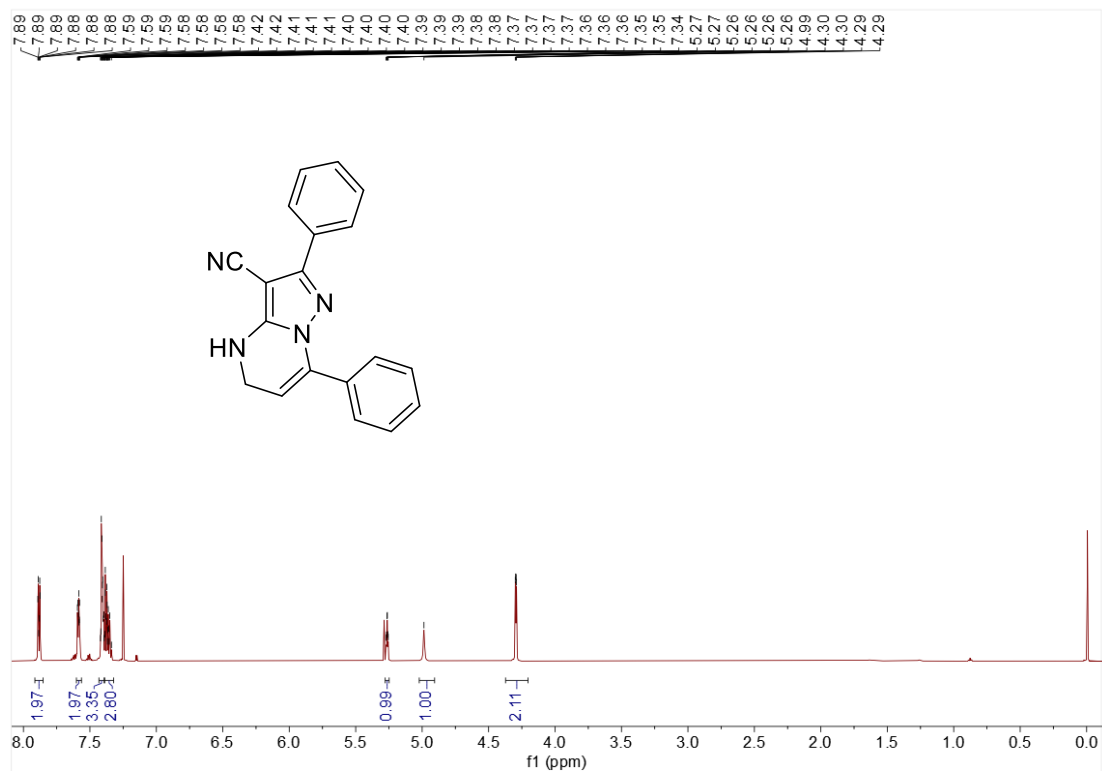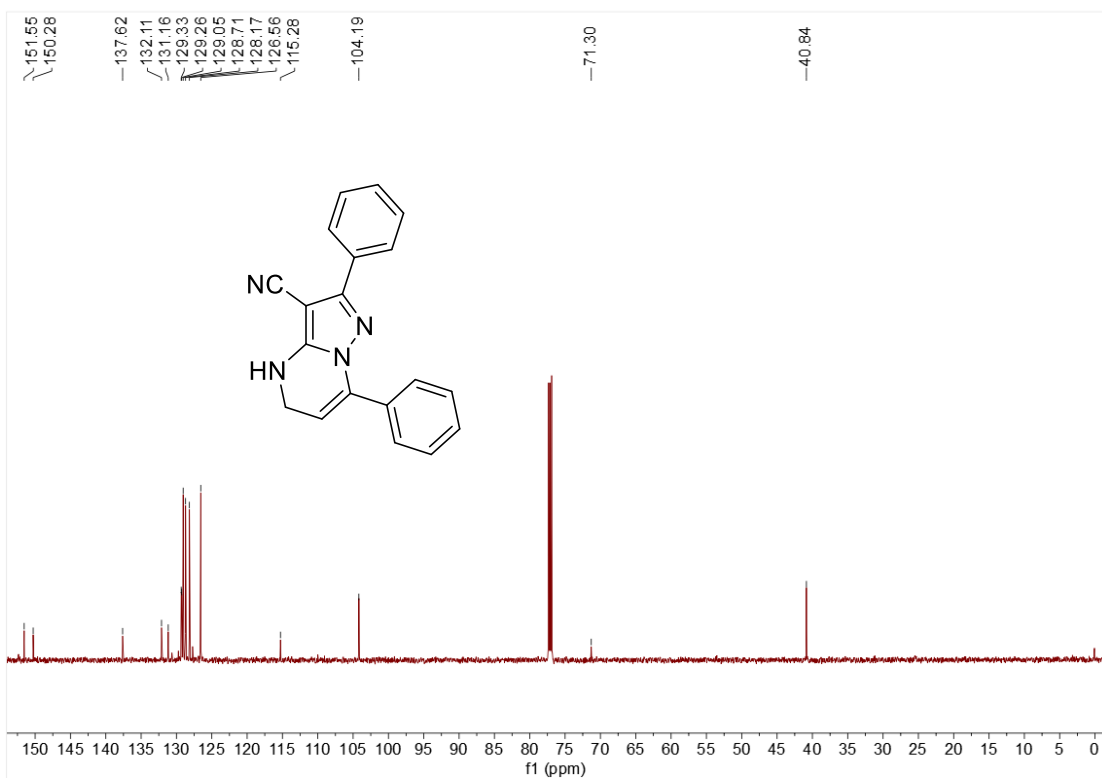

7-phenyl-4,5-dihydropyrazolo[1,5-*a*]pyrimidine (**5m**)

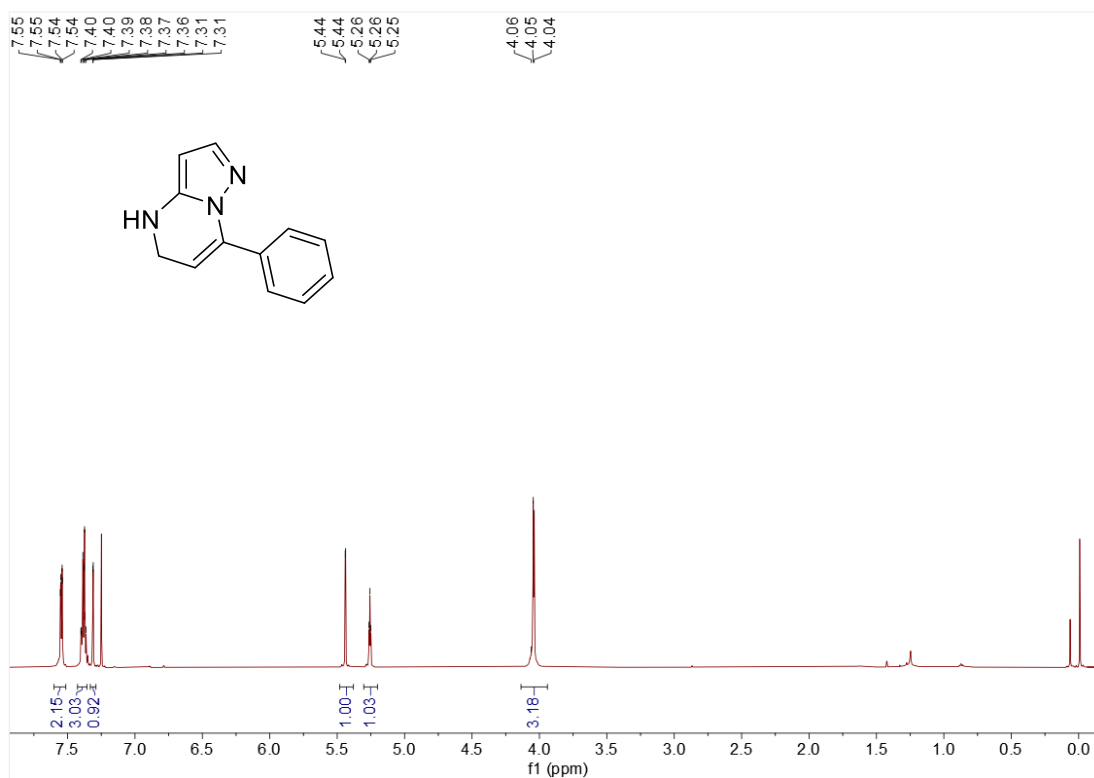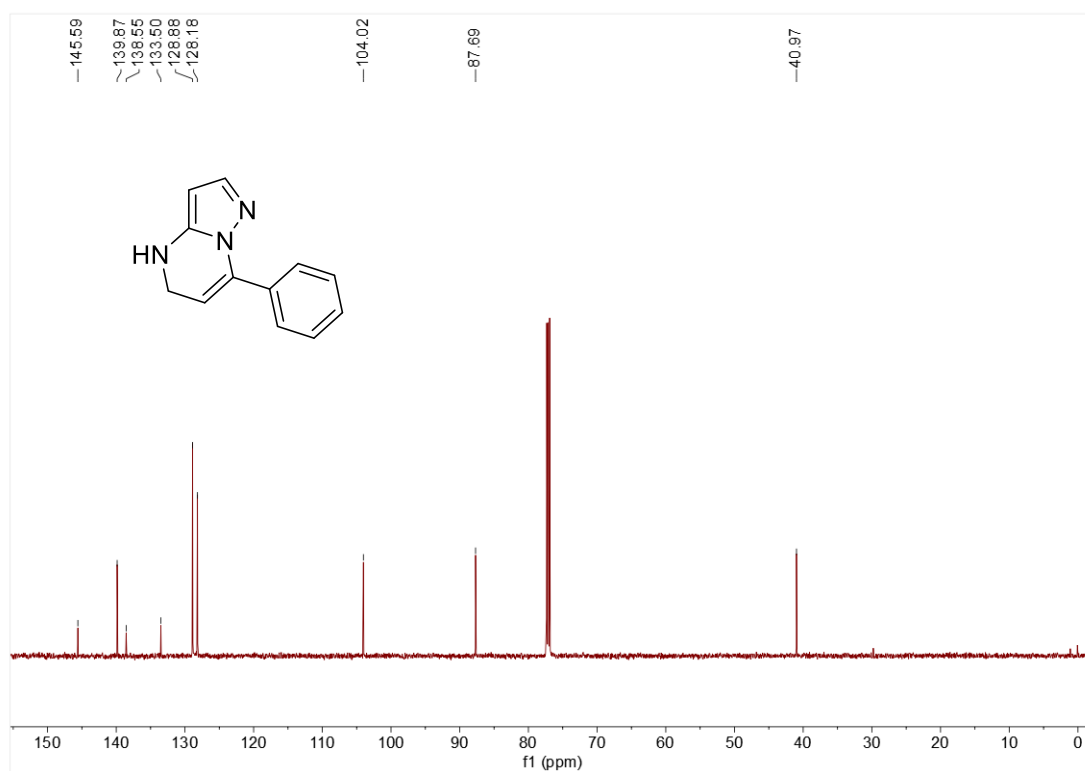

7-phenyl-4,5,6,7-tetrahydropyrazolo[1,5-a]pyrimidine-3-carbonitrile (**2a**)

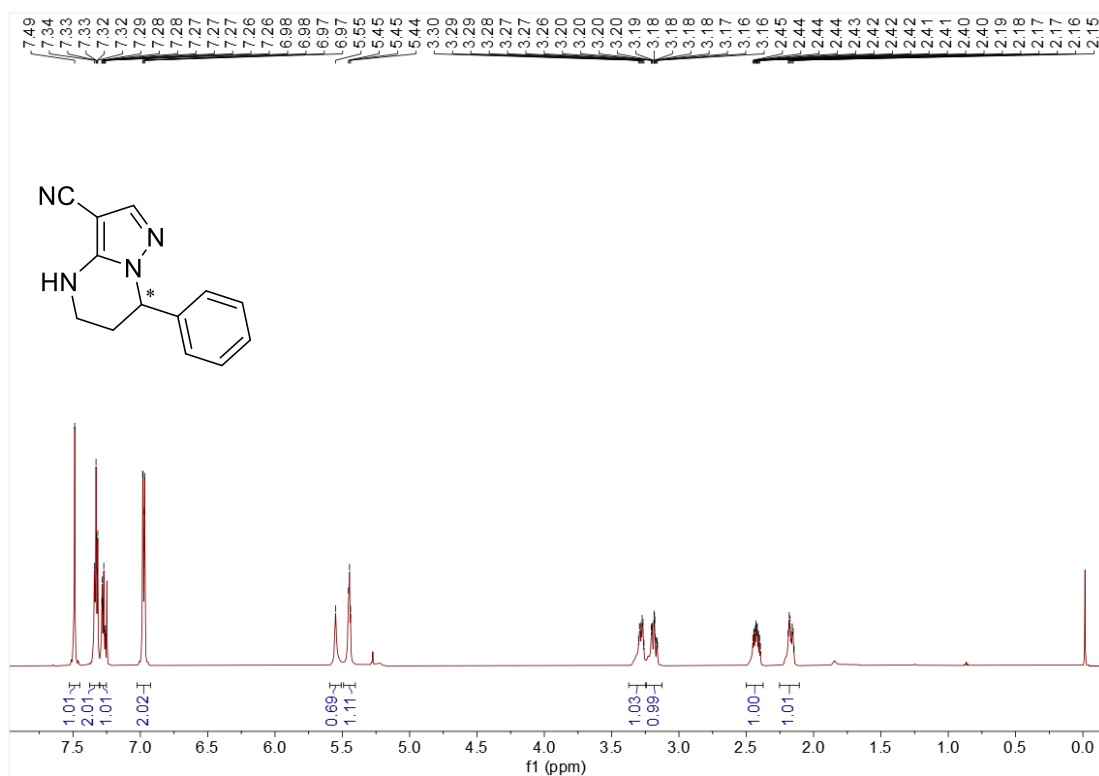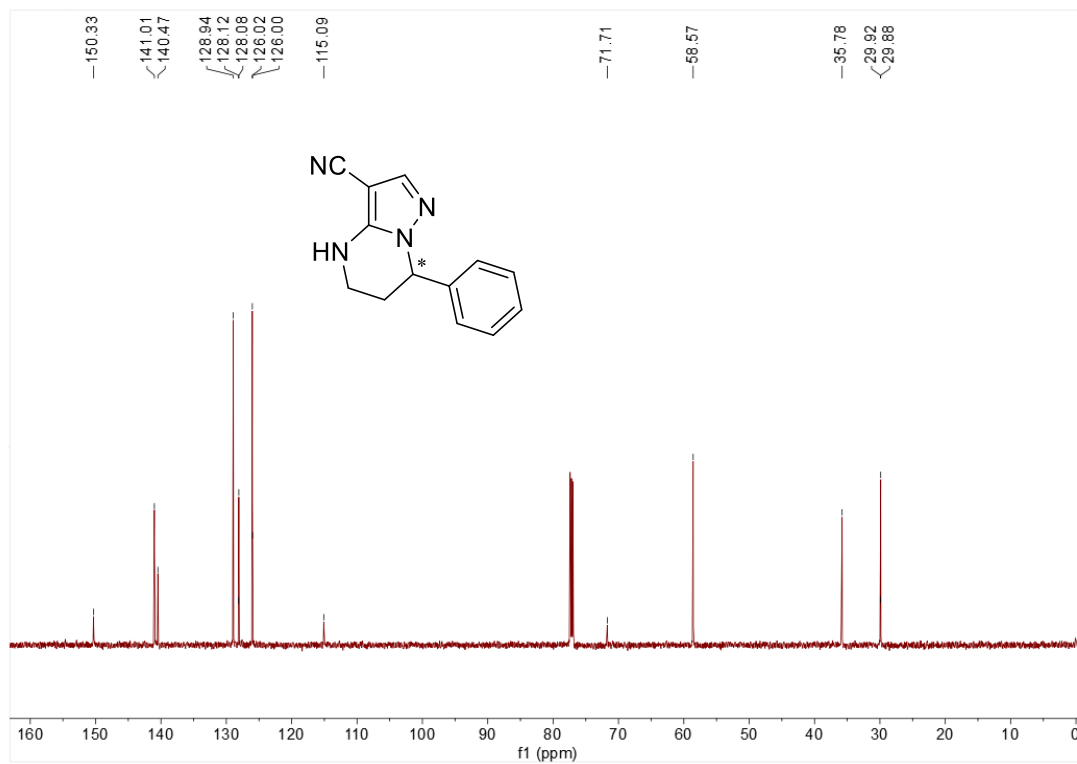

7-(*m*-tolyl)-4,5,6,7-tetrahydropyrazolo[1,5-*a*]pyrimidine-3-carbonitrile (**2b**)

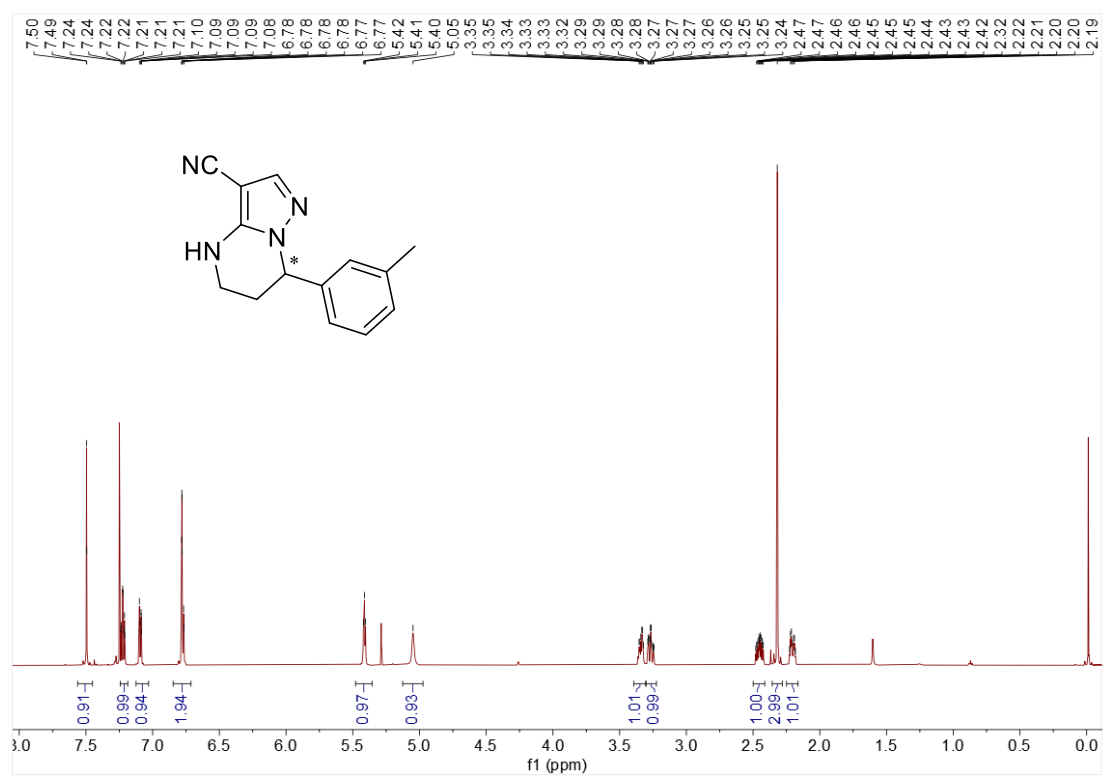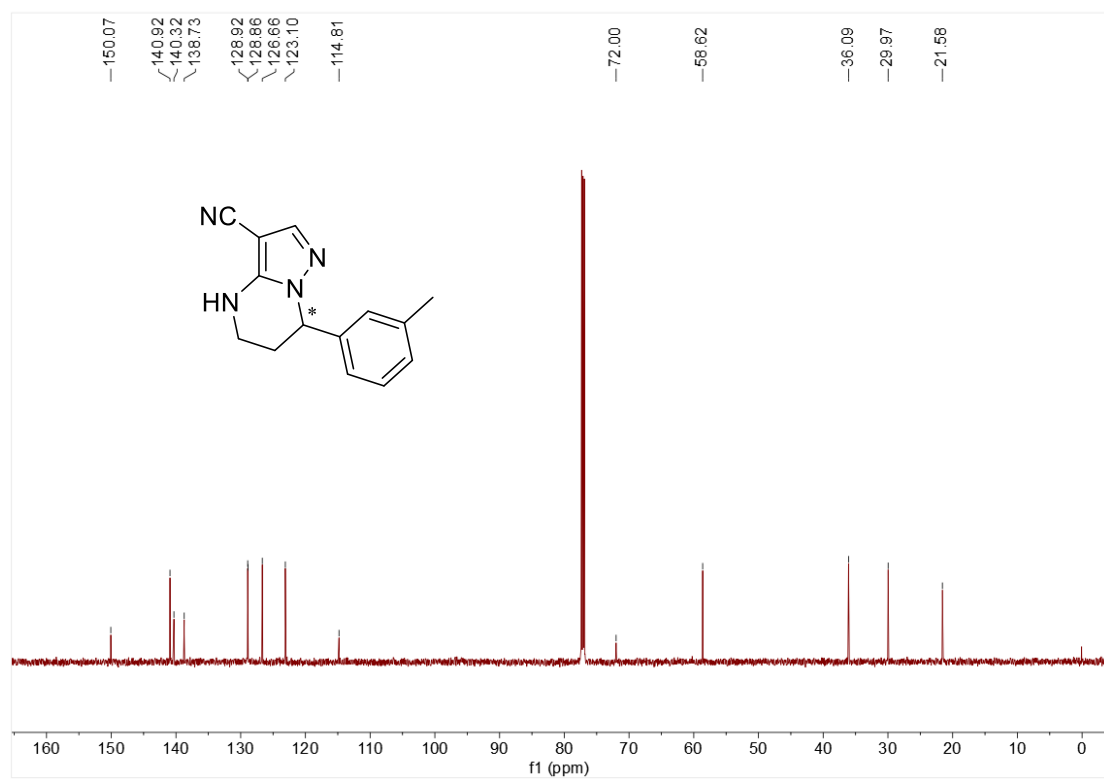

7-(3-methoxyphenyl)-4,5,6,7-tetrahydropyrazolo[1,5-a]pyrimidine-3-carbonitrile (**2c**)

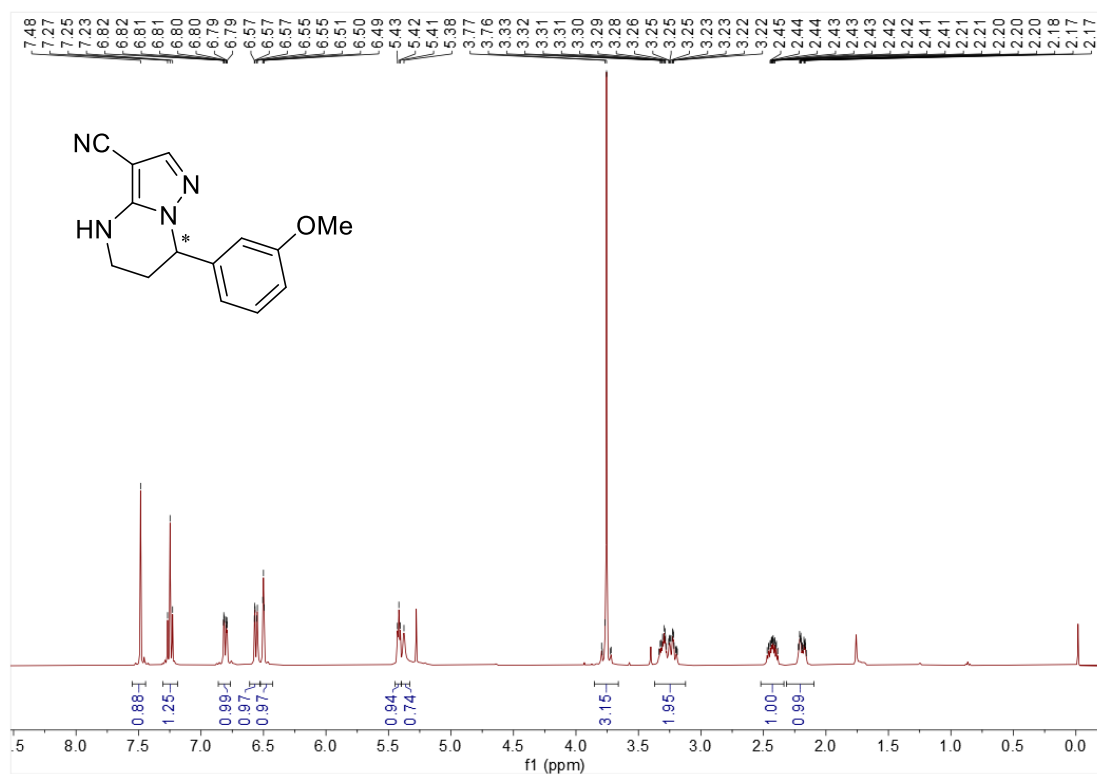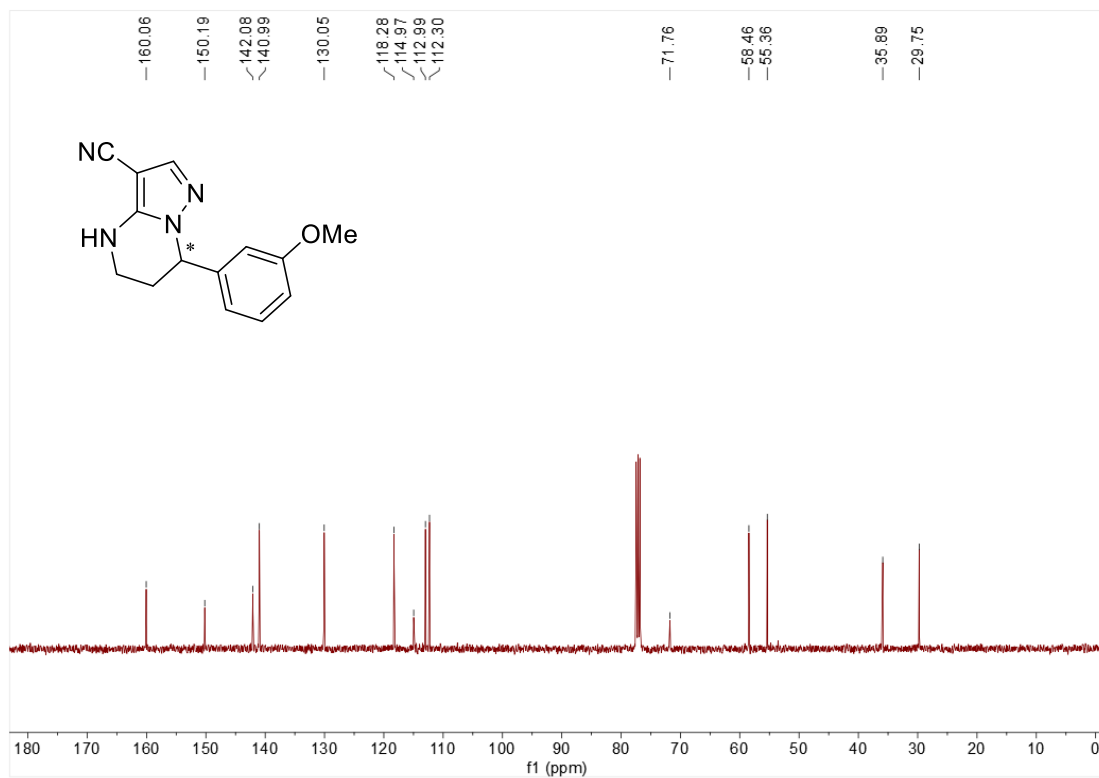

7-(4-(*tert*-butyl)phenyl)-4,5,6,7-tetrahydropyrazolo[1,5-*a*]pyrimidine-3-carbonitrile

(2d)

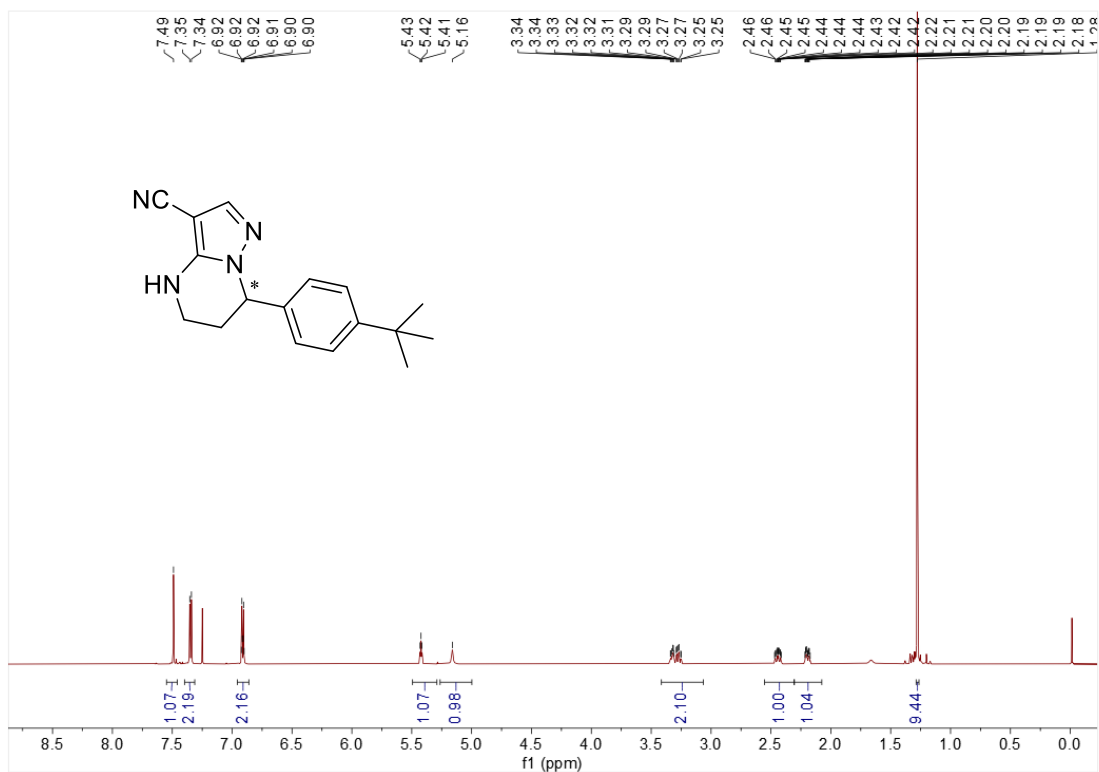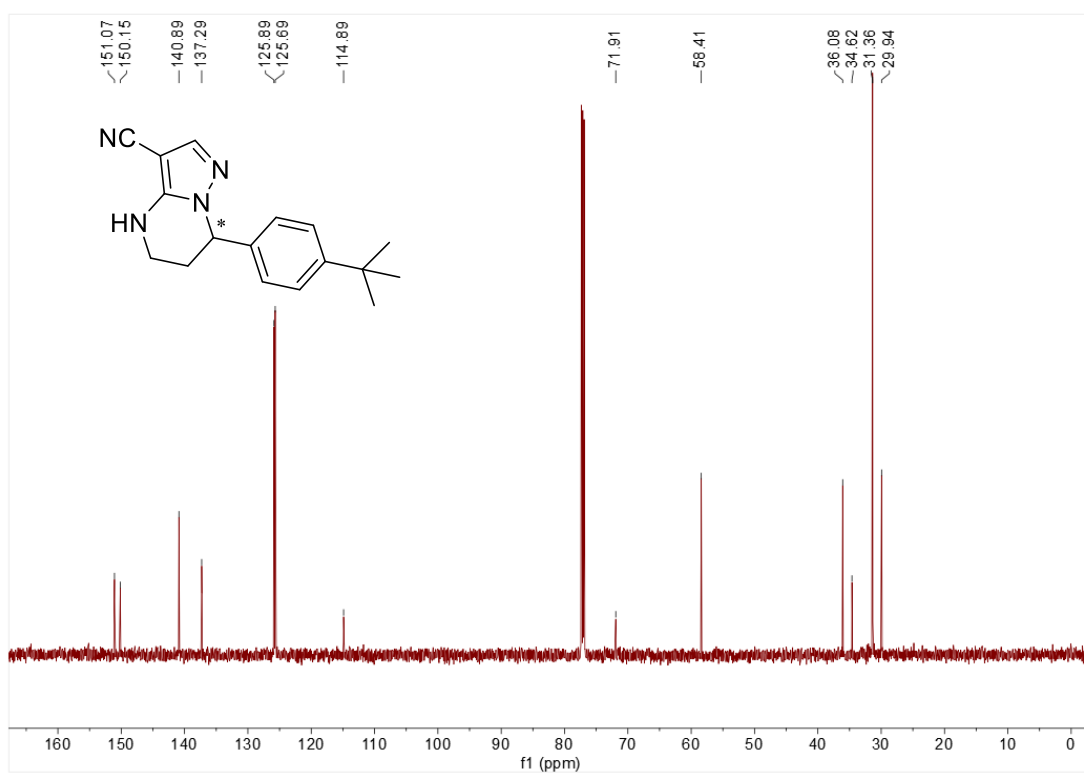

7-(3-chlorophenyl)-4,5,6,7-tetrahydropyrazolo[1,5-a]pyrimidine-3-carbonitrile (**2e**)

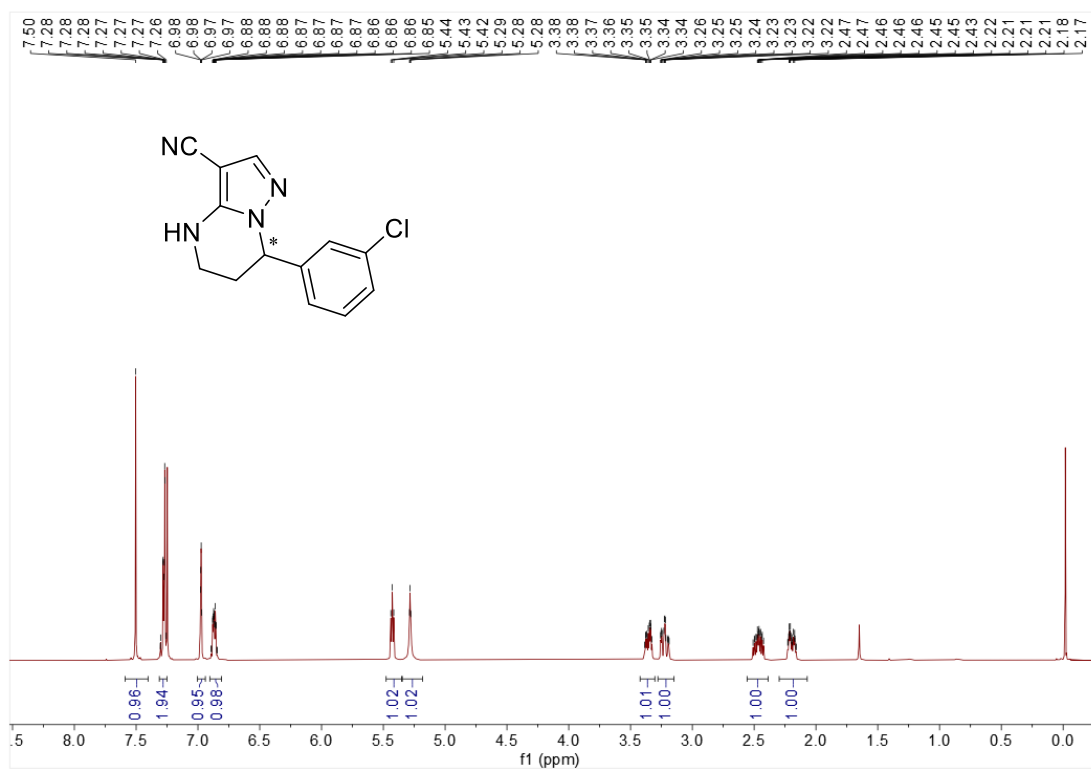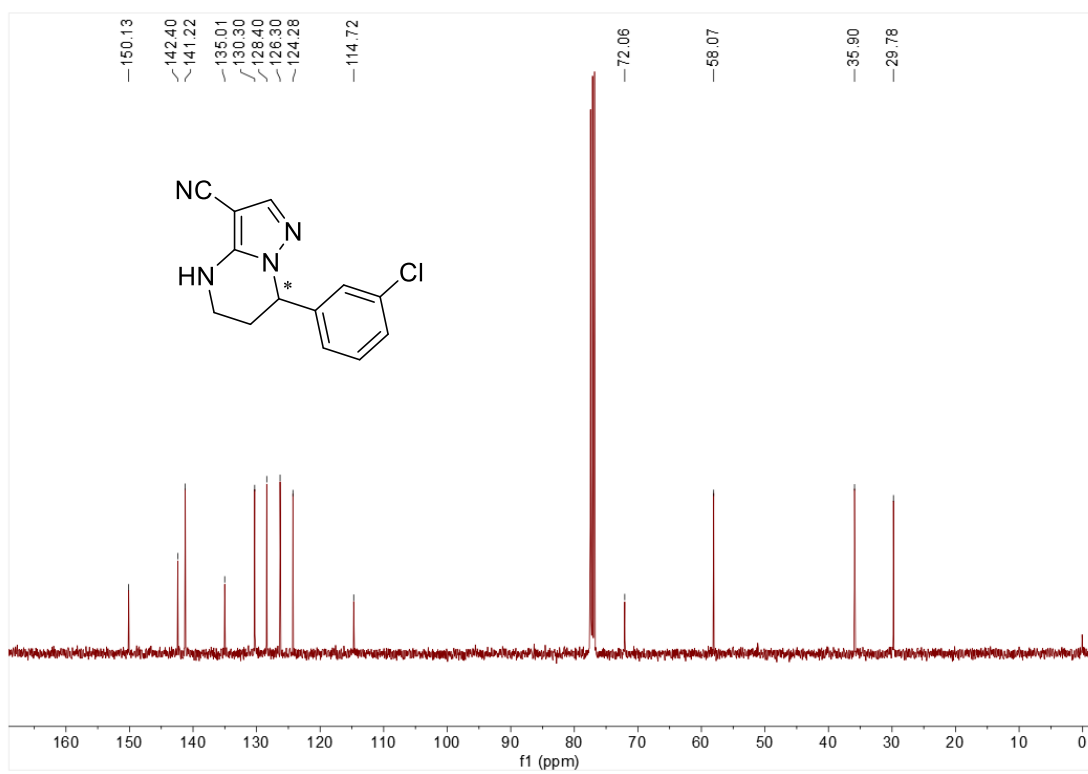

7-(3-fluorophenyl)-4,5,6,7-tetrahydropyrazolo[1,5-*a*]pyrimidine-3-carbonitrile (**2f**)

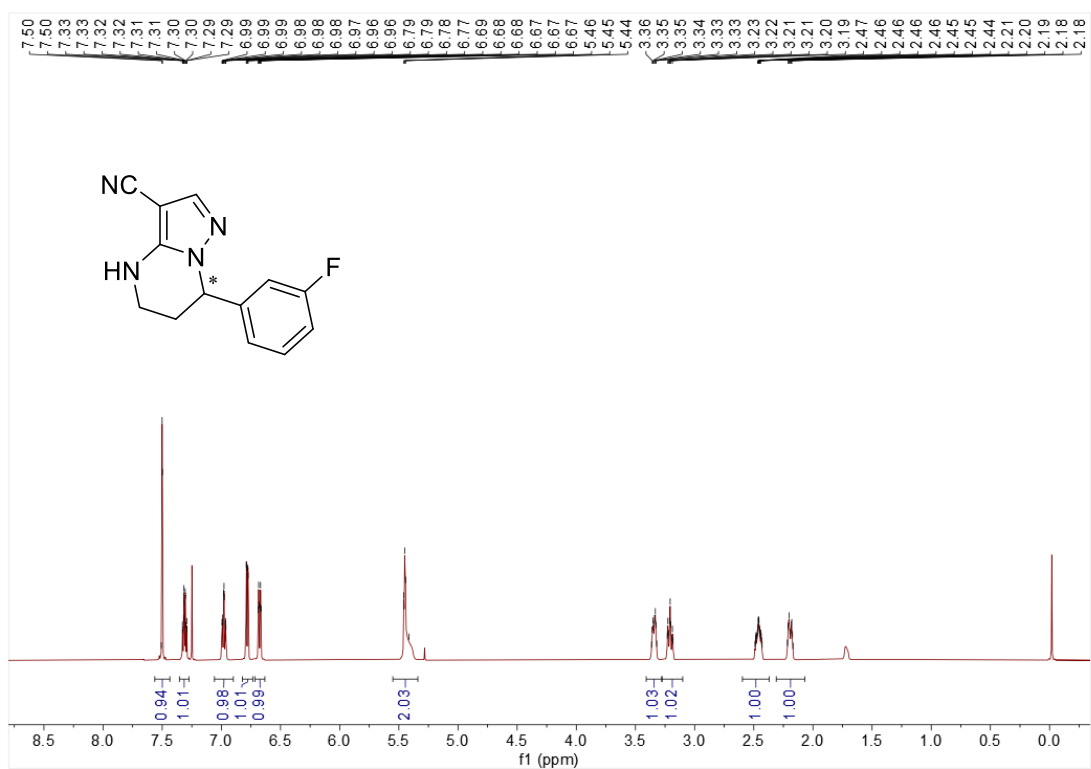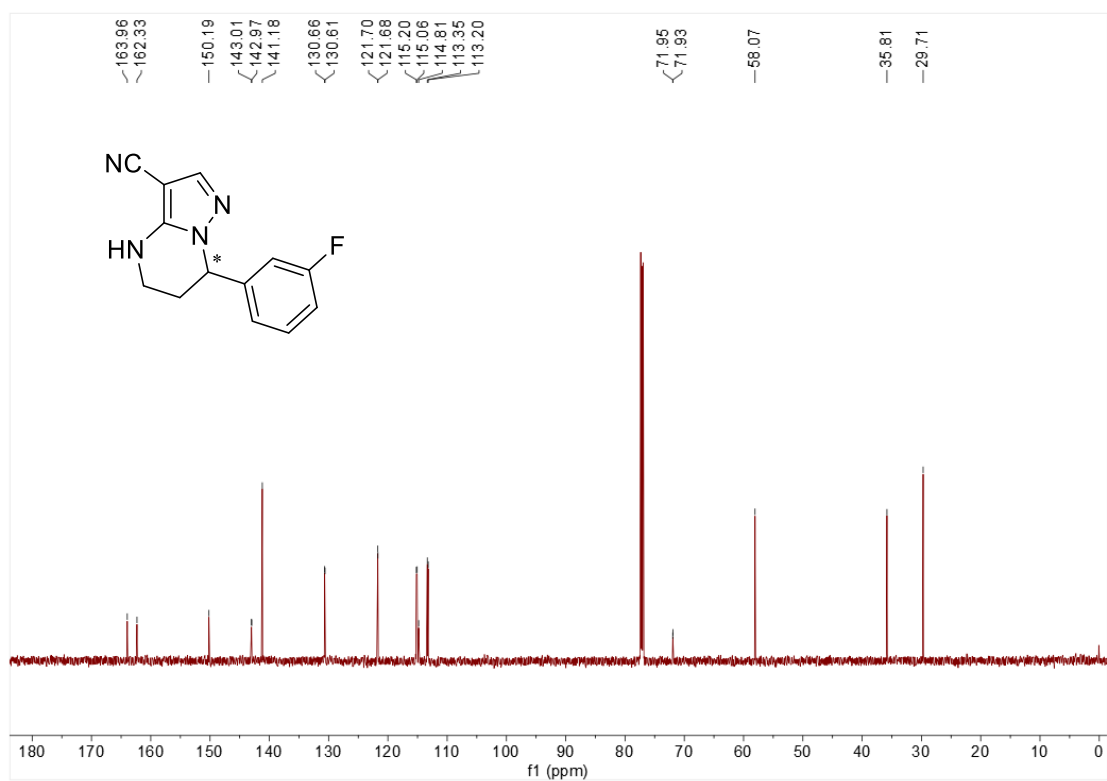



7-(3-bromophenyl)-4,5,6,7-tetrahydropyrazolo[1,5-a]pyrimidine-3-carbonitrile (**2g**)

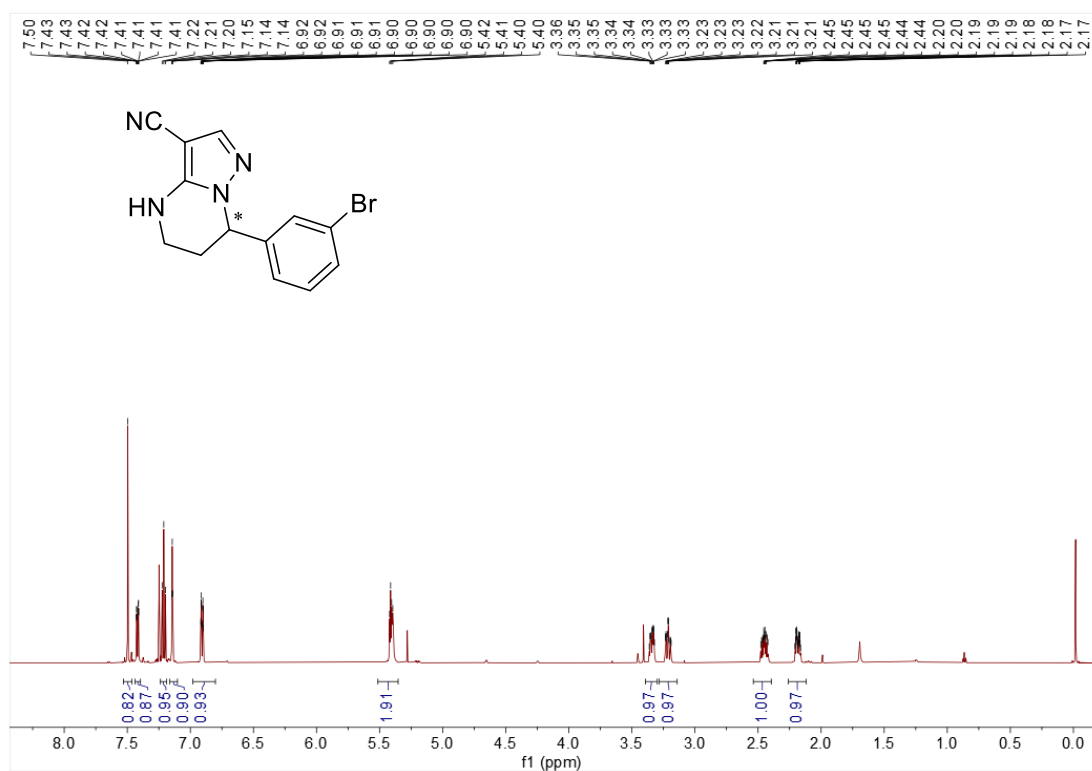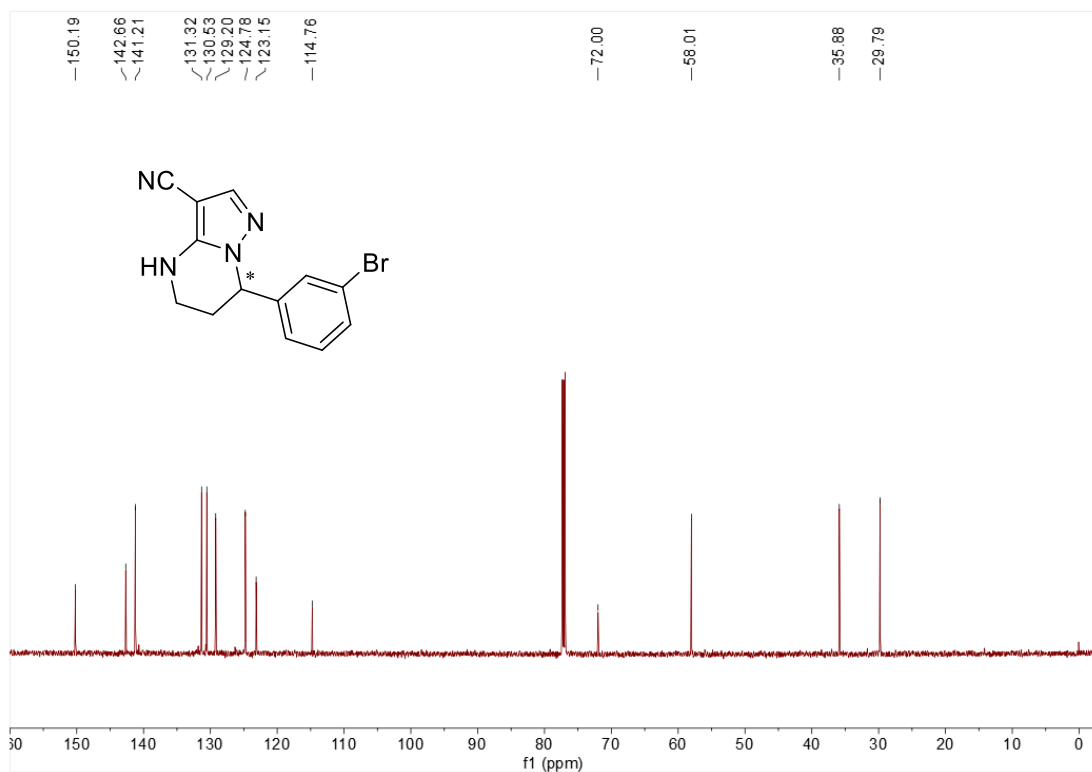

7-(4-fluorophenyl)-4,5,6,7-tetrahydropyrazolo[1,5-a]pyrimidine-3-carbonitrile (**2h**)

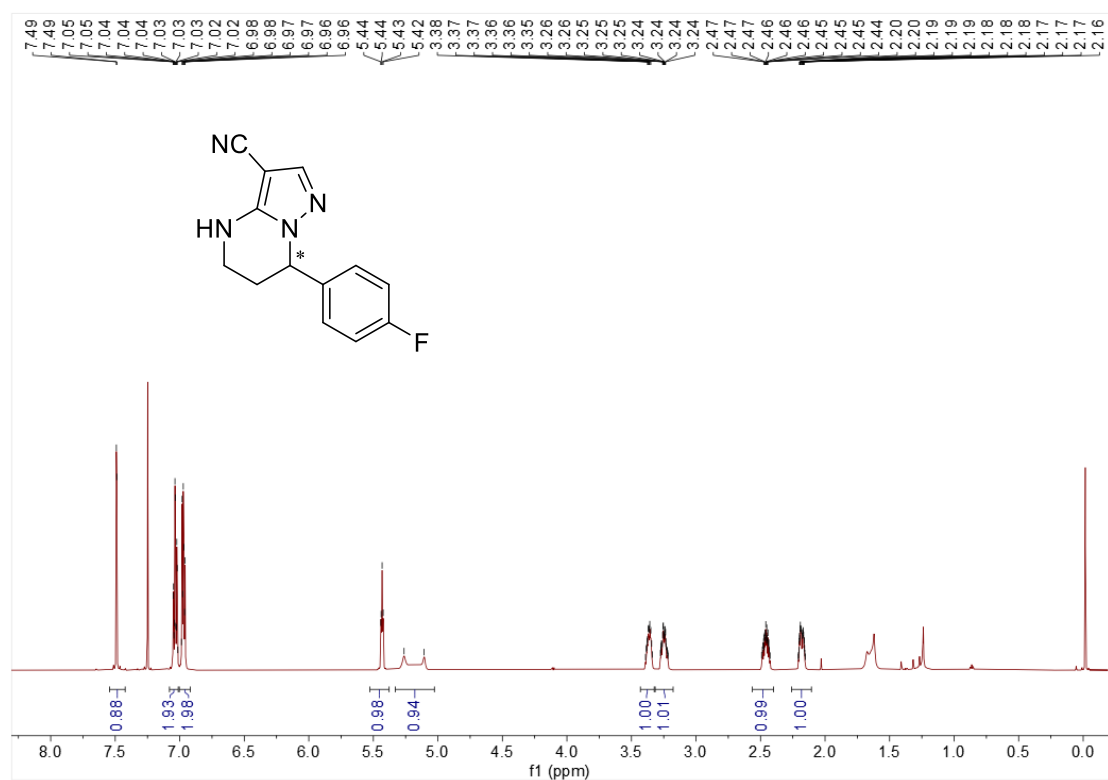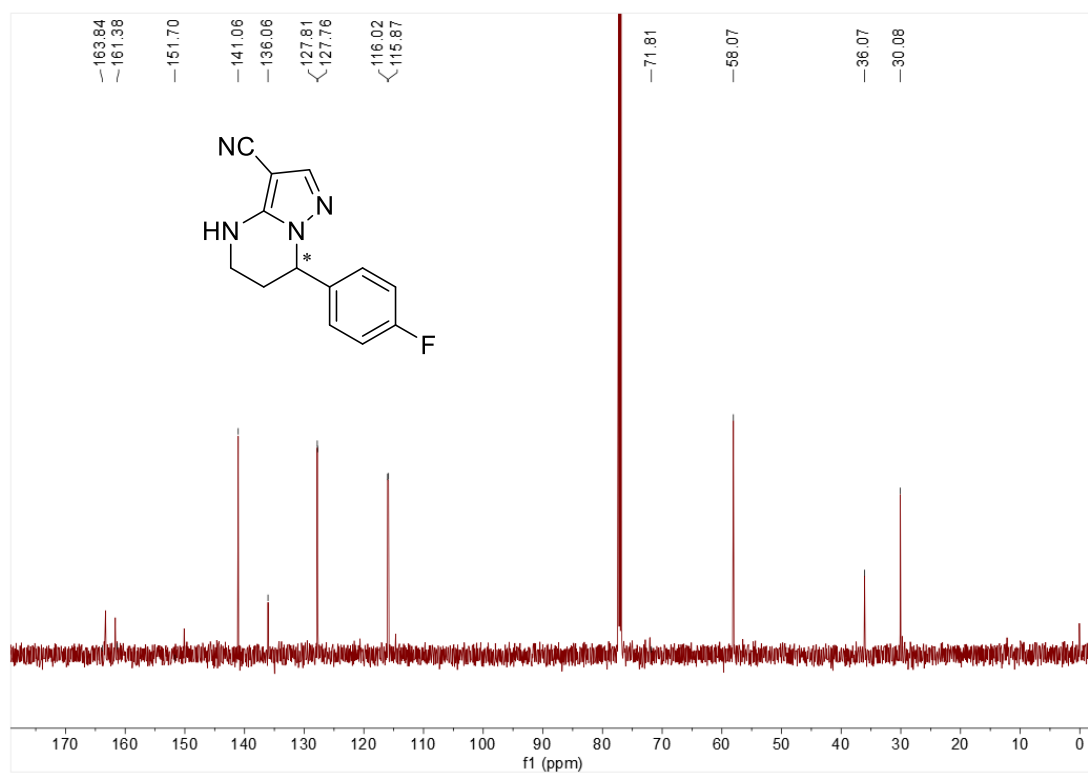

7-(4-chlorophenyl)-4,5,6,7-tetrahydropyrazolo[1,5-a]pyrimidine-3-carbonitrile (**2i**)

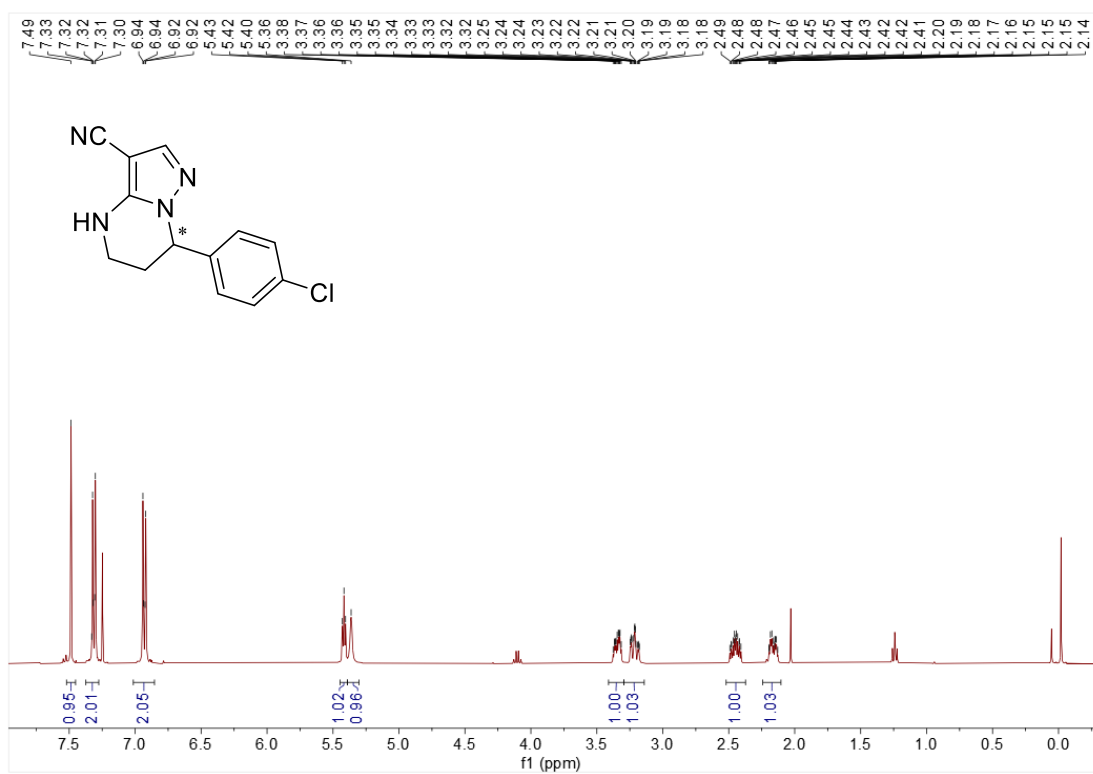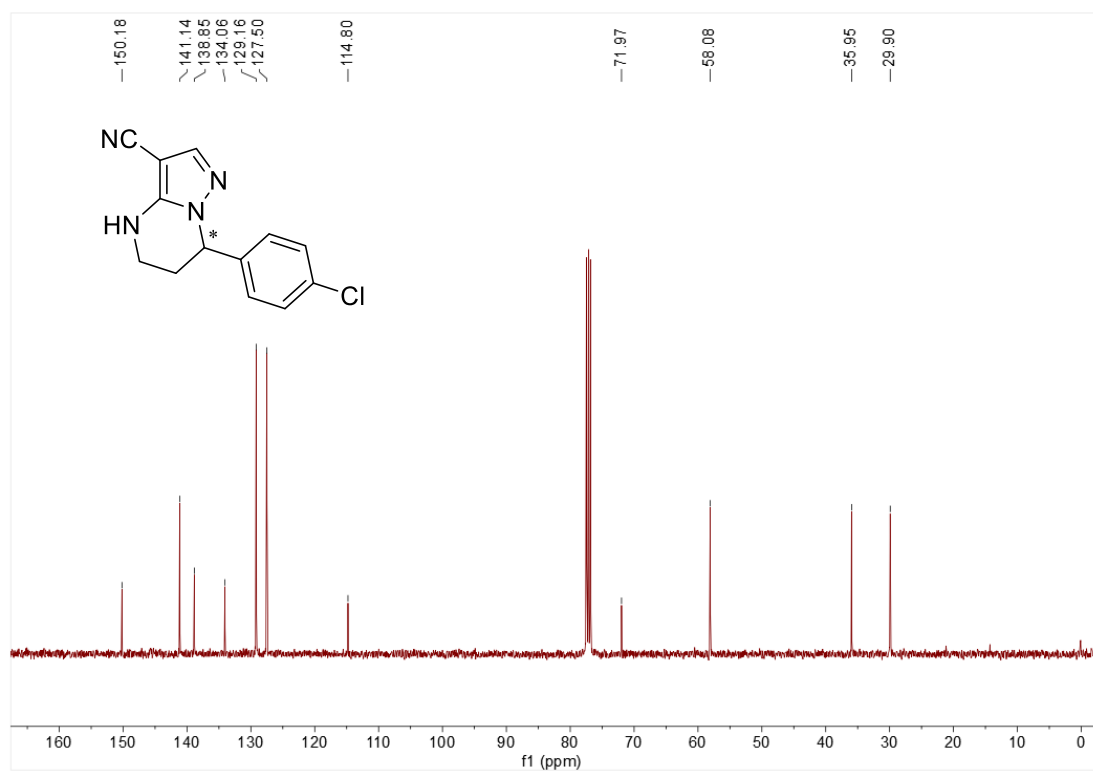

7-(4-bromophenyl)-4,5,6,7-tetrahydropyrazolo[1,5-a]pyrimidine-3-carbonitrile (**2j**)

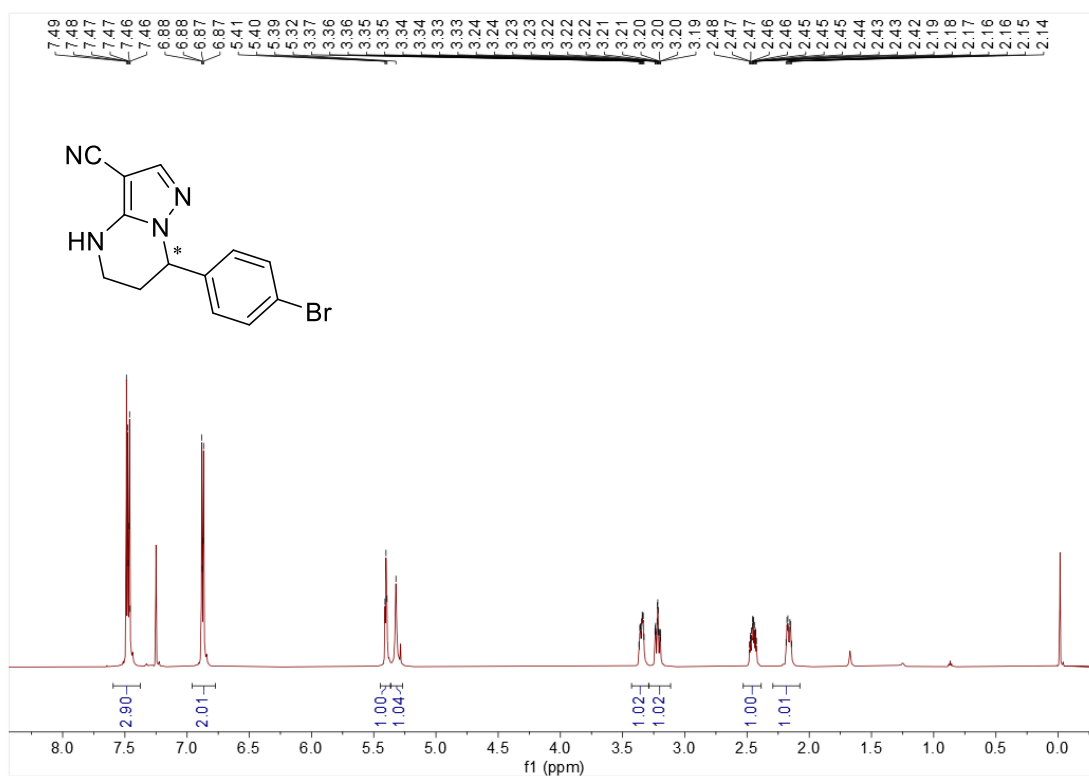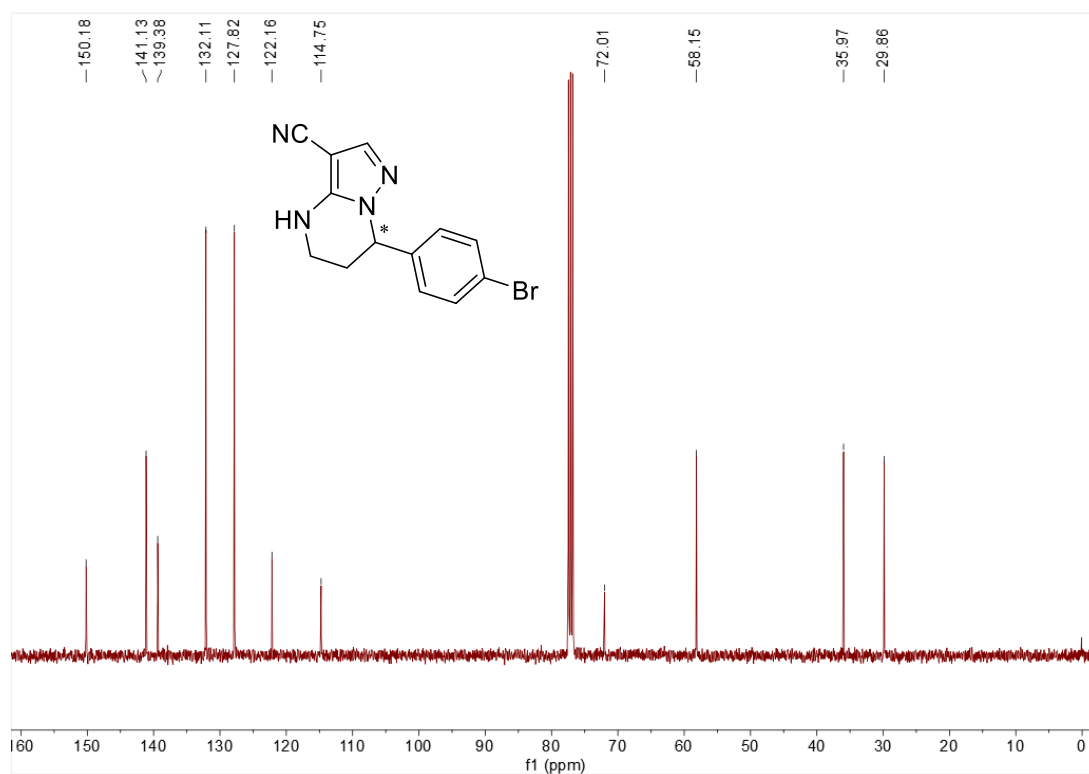

7-(2-methoxyphenyl)-4,5,6,7-tetrahydropyrazolo[1,5-a]pyrimidine-3-carbonitrile (**2k**)

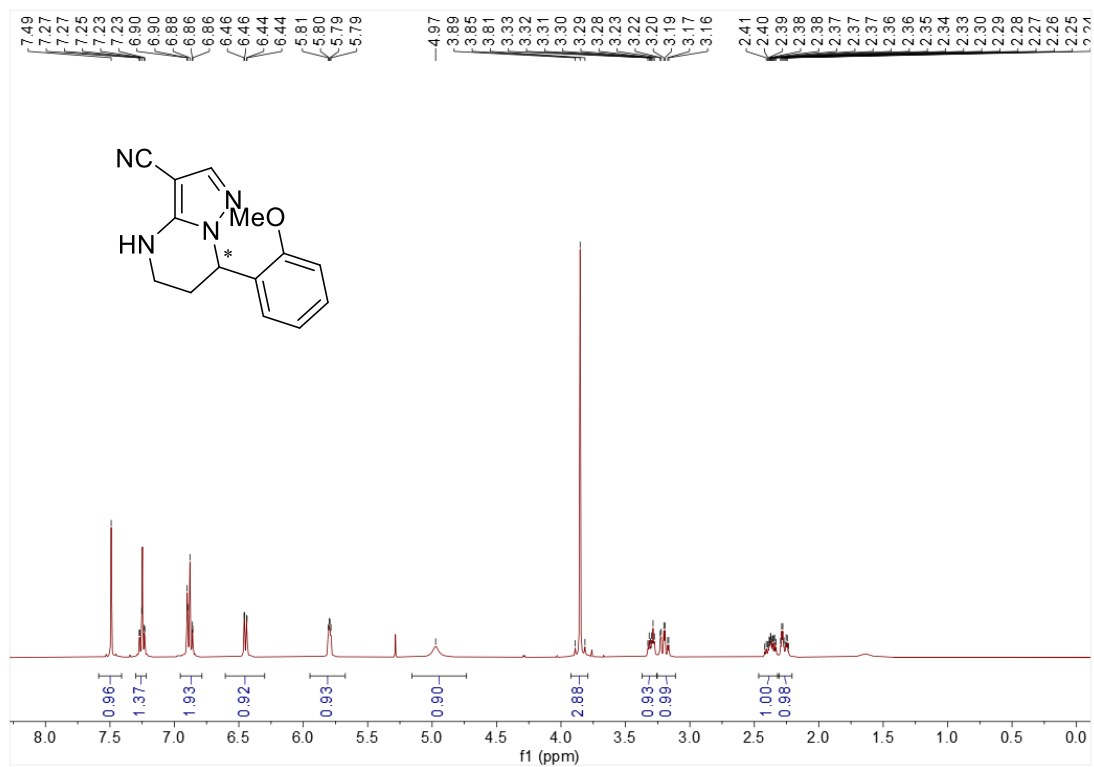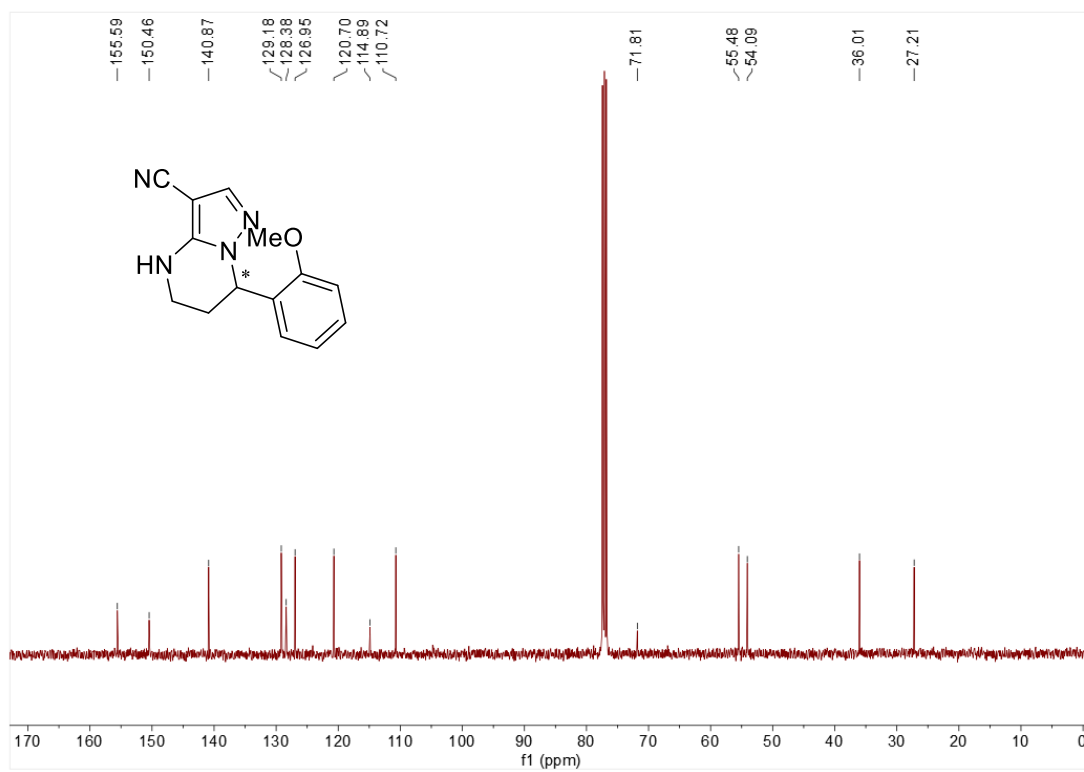

7-(2-fluorophenyl)-4,5,6,7-tetrahydropyrazolo[1,5-a]pyrimidine-3-carbonitrile (**21**)

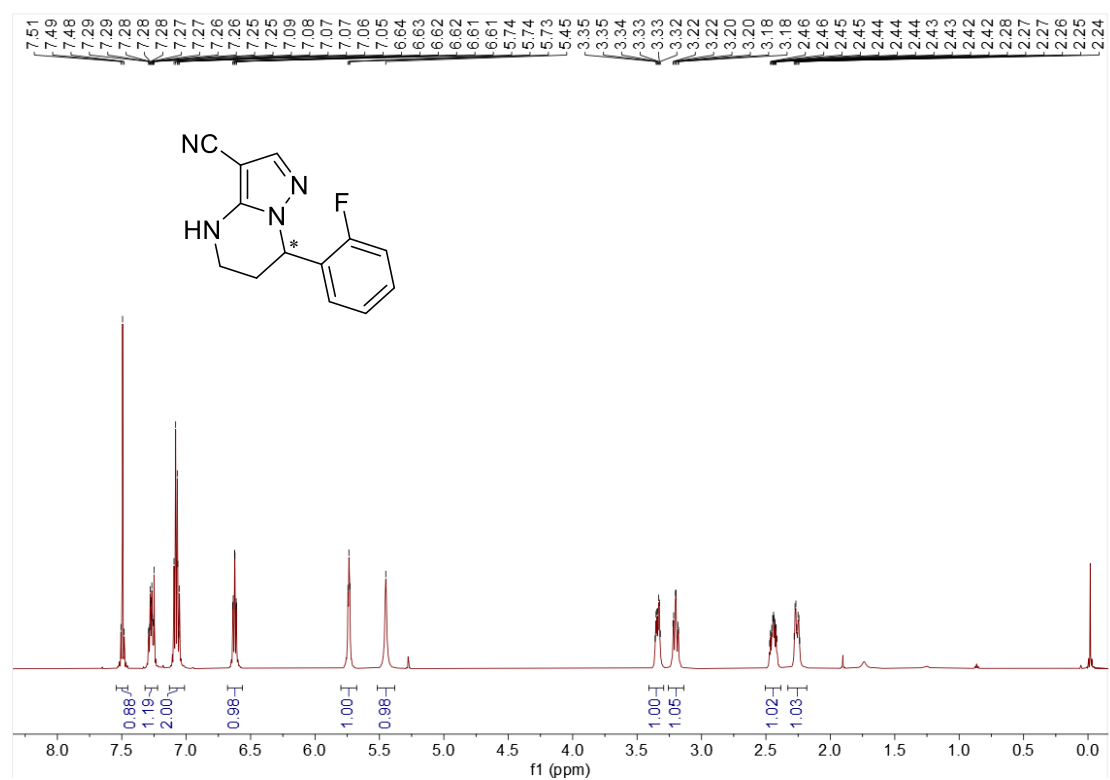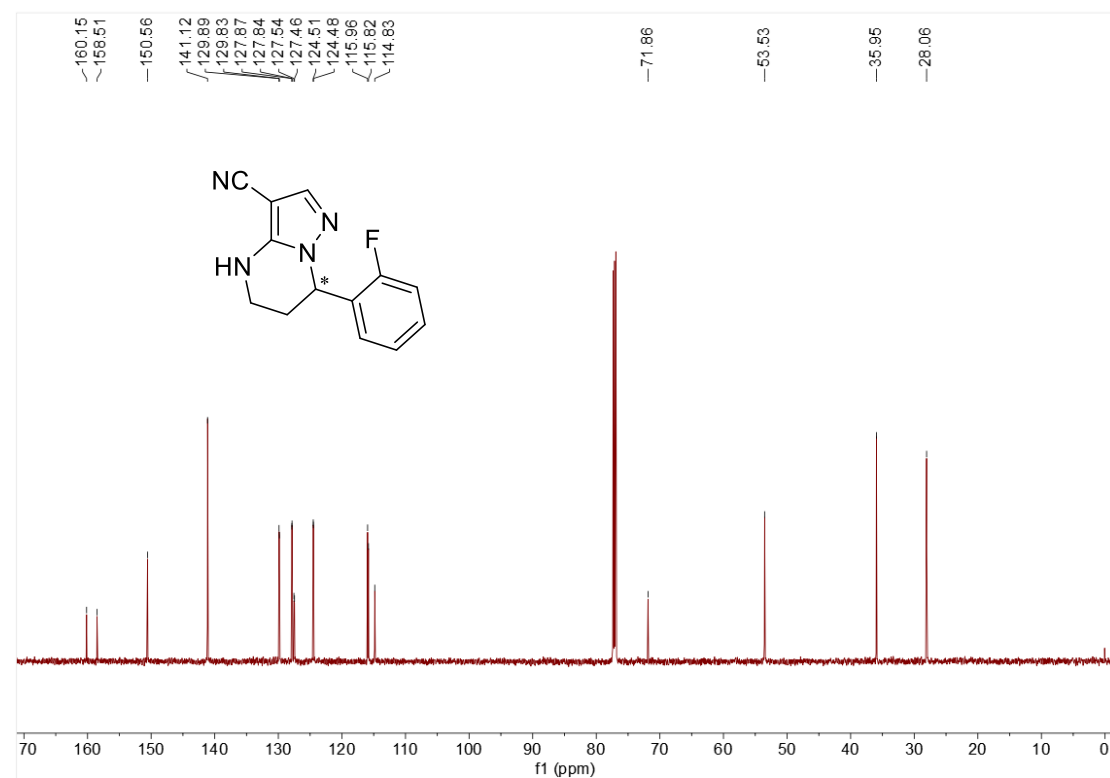

7-(2-chlorophenyl)-4,5,6,7-tetrahydropyrazolo[1,5-a]pyrimidine-3-carbonitrile (**2m**)

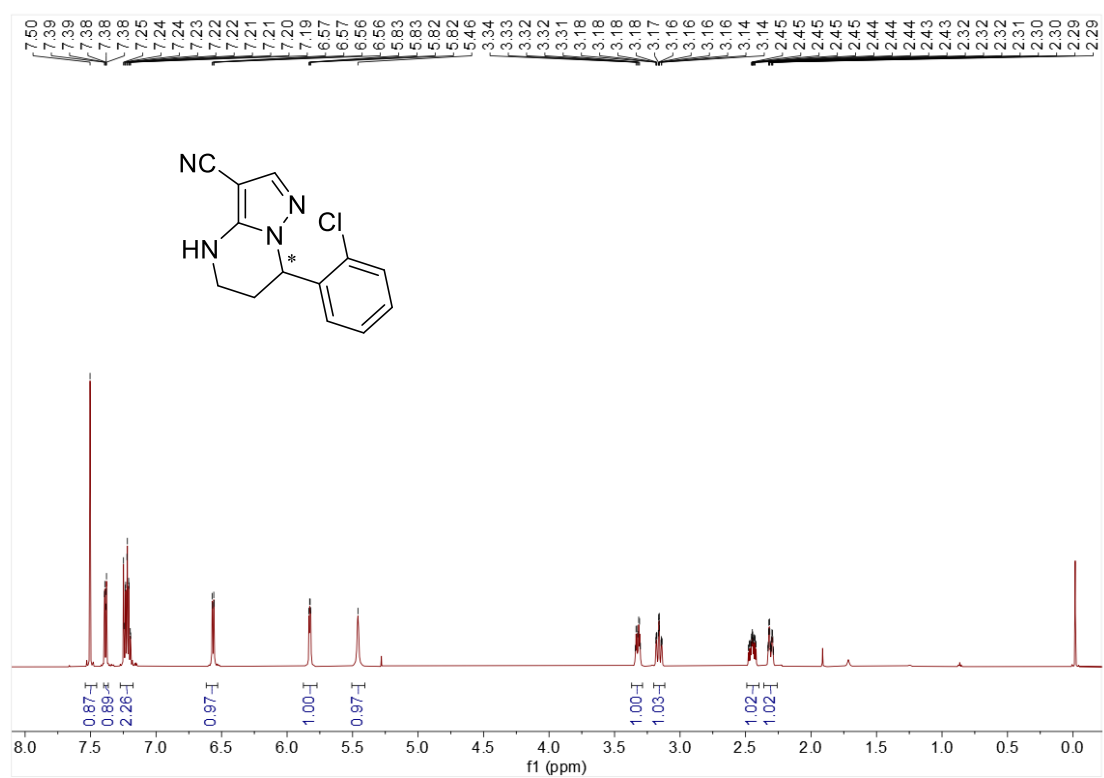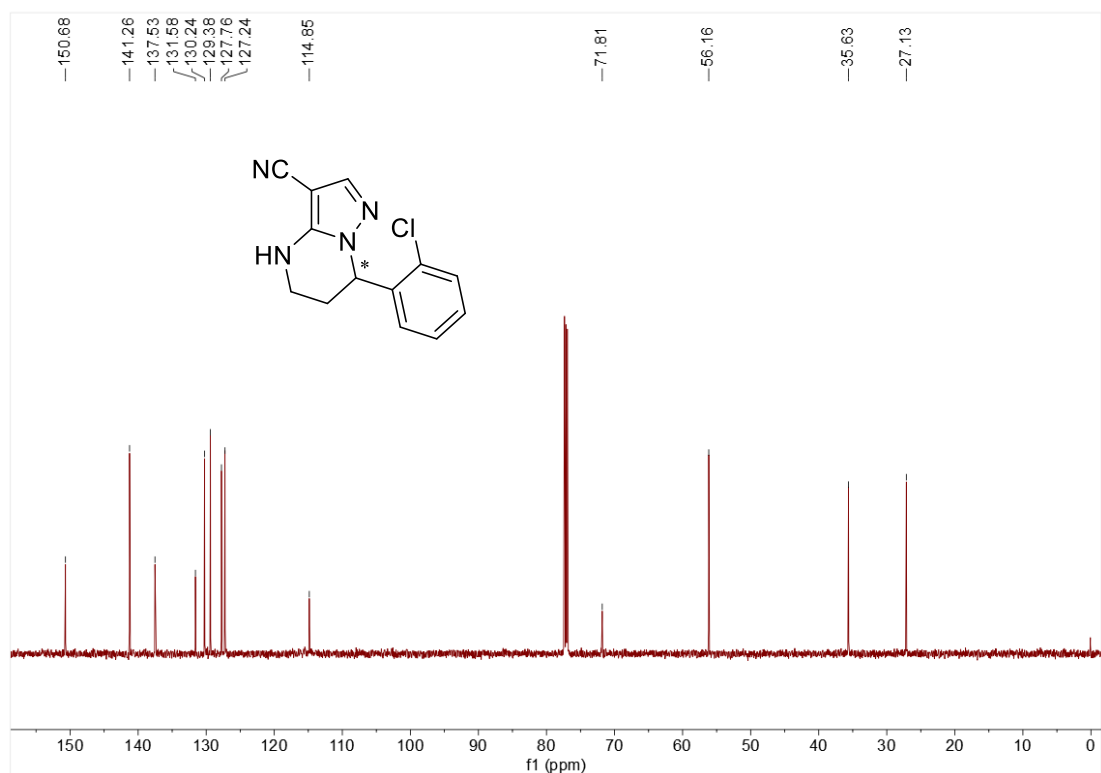

7-(2-bromophenyl)-4,5,6,7-tetrahydropyrazolo[1,5-a]pyrimidine-3-carbonitrile (**2n**)

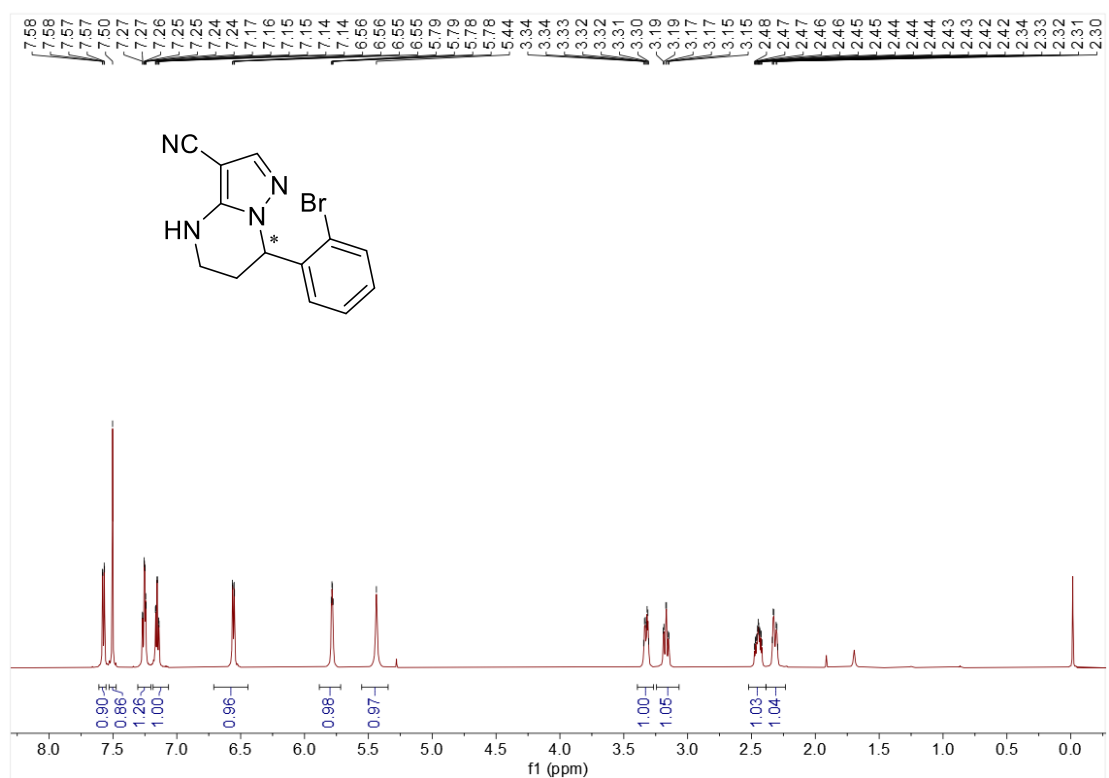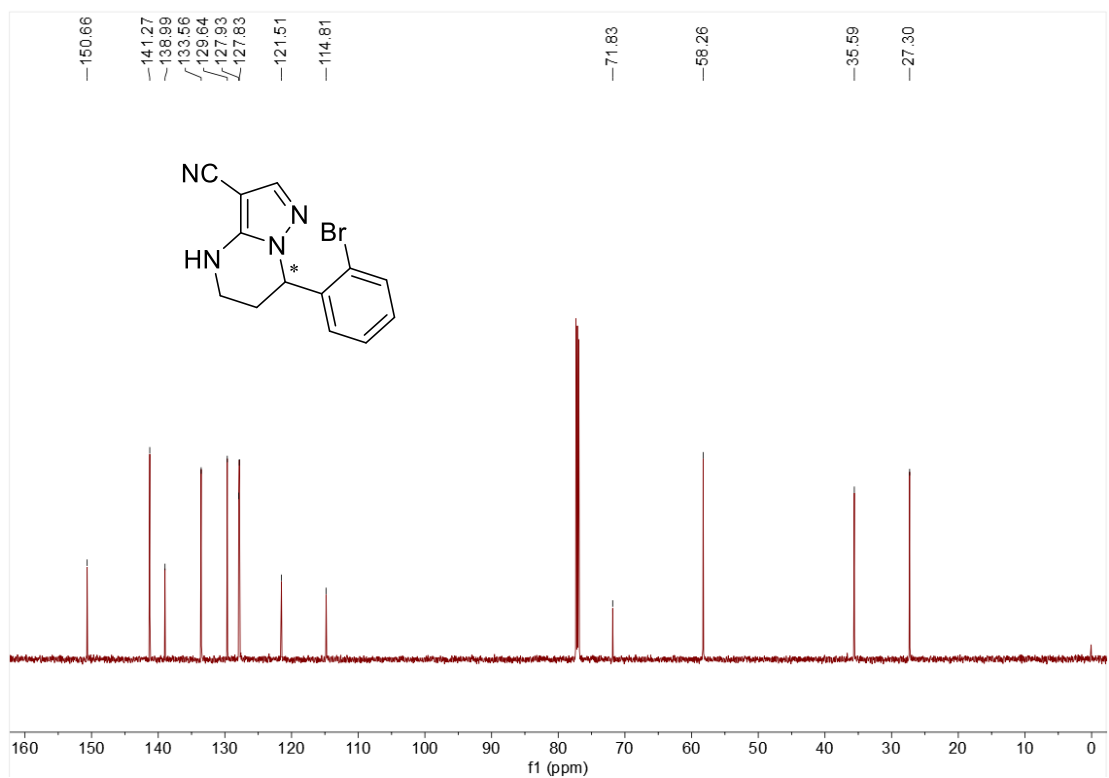



2,7-diphenyl-4,5,6,7-tetrahydropyrazolo[1,5-a]pyrimidine-3-carbonitrile (**2o**)

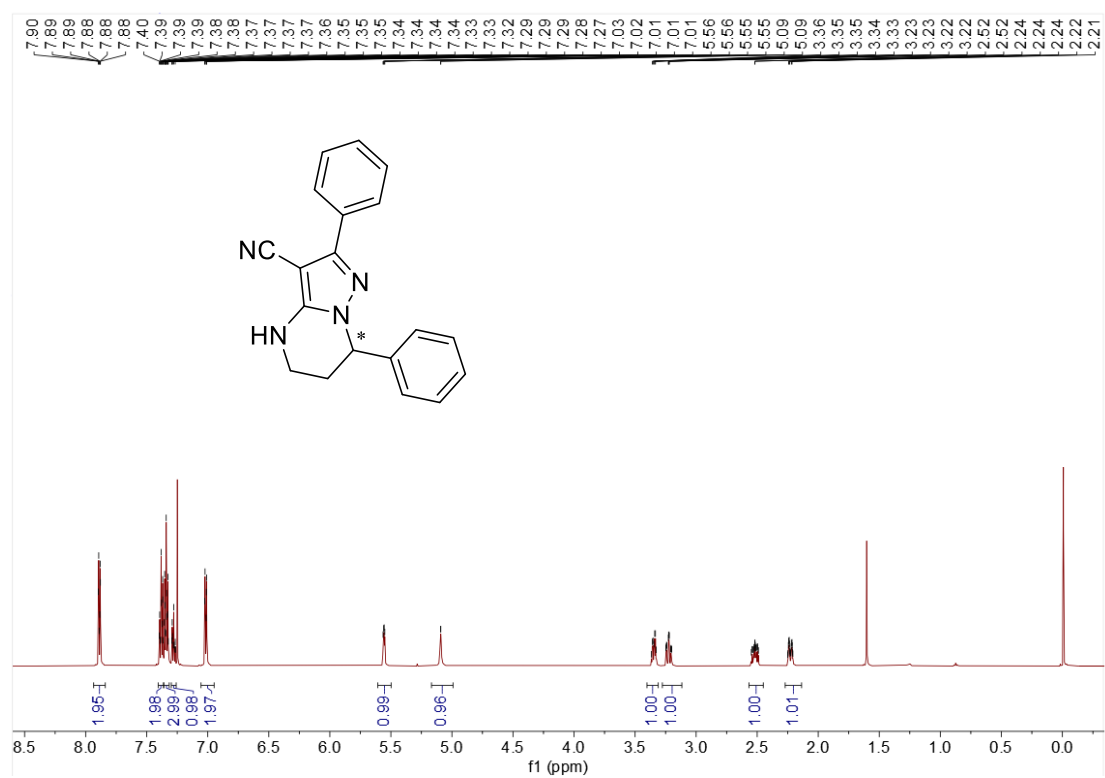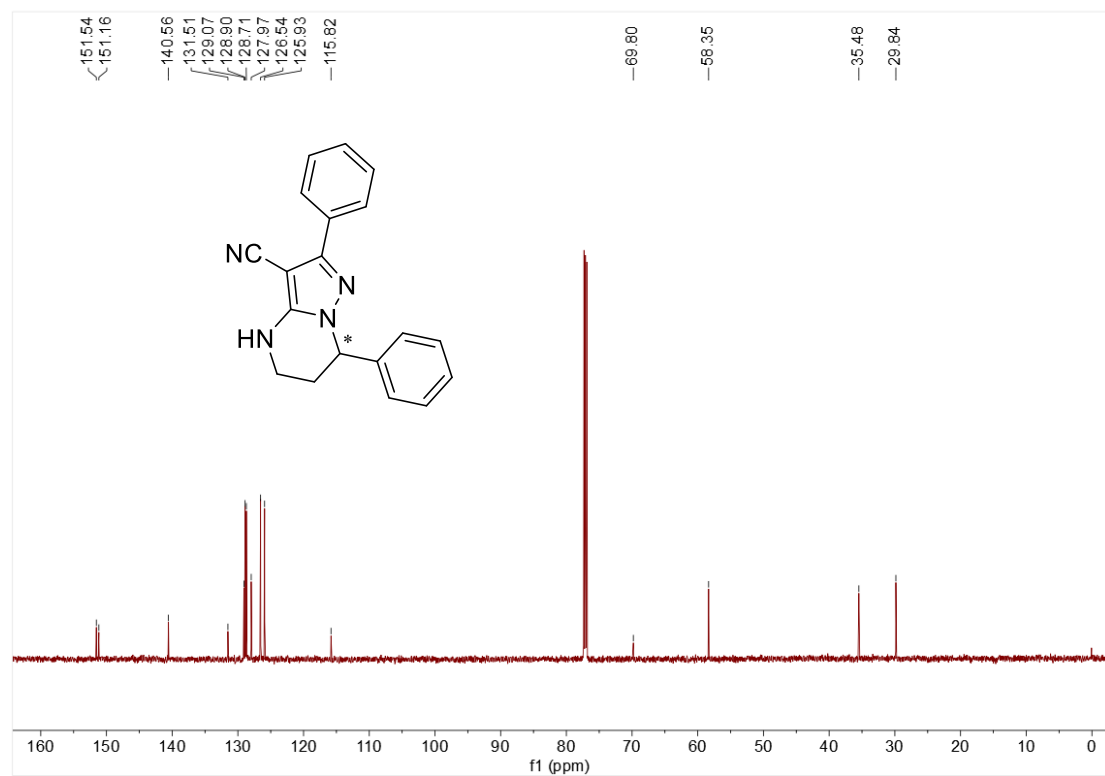

ethyl 7-phenyl-4,5,6,7-tetrahydropyrazolo[1,5-a]pyrimidine-3-carboxylate (**2p**)

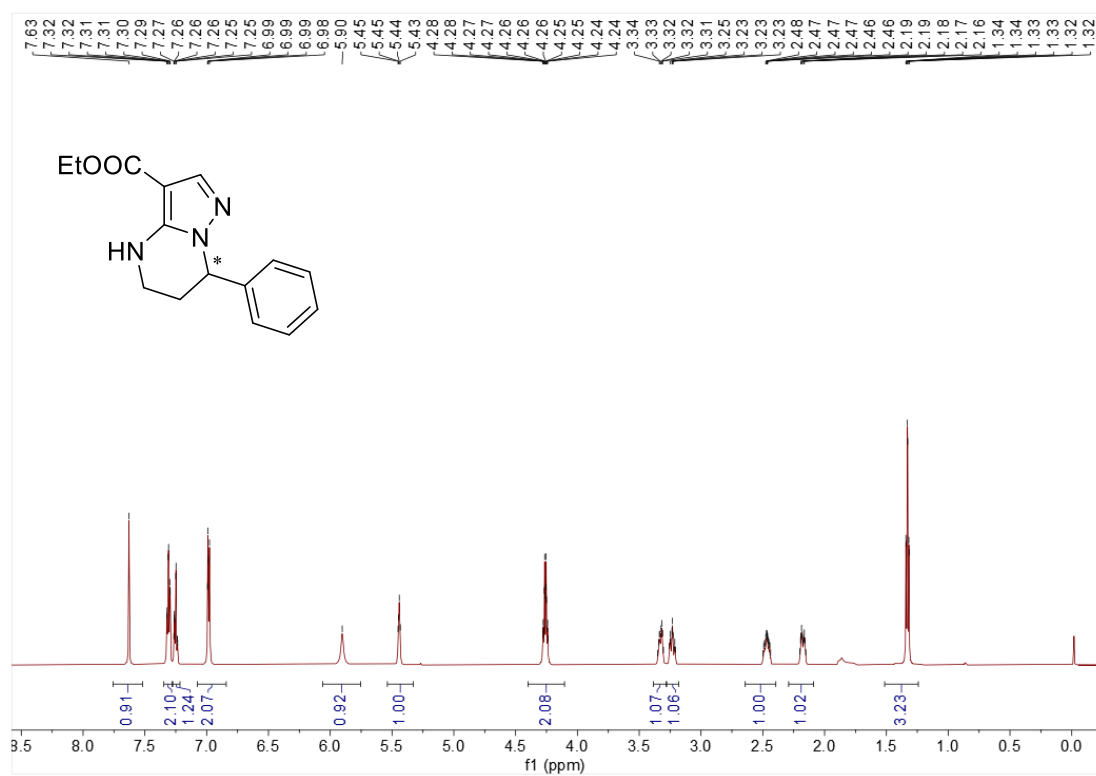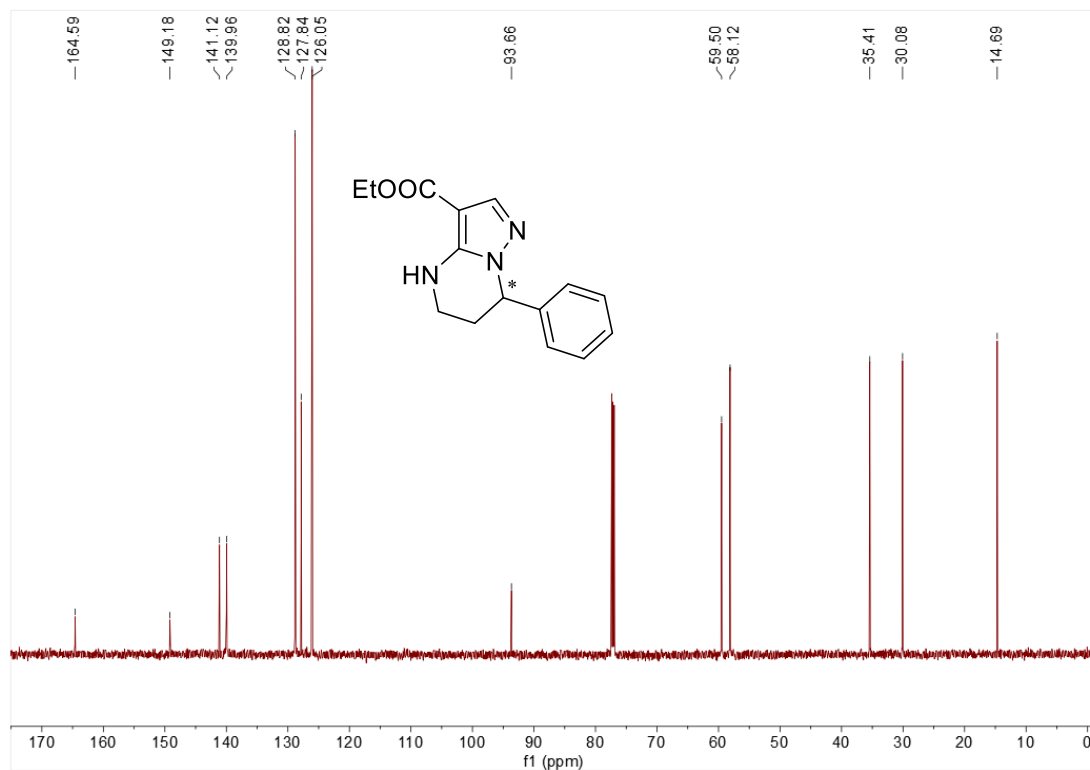

7-(pyridin-2-yl)-4,5,6,7-tetrahydropyrazolo[1,5-a]pyrimidine-3-carbonitrile (**2q**)

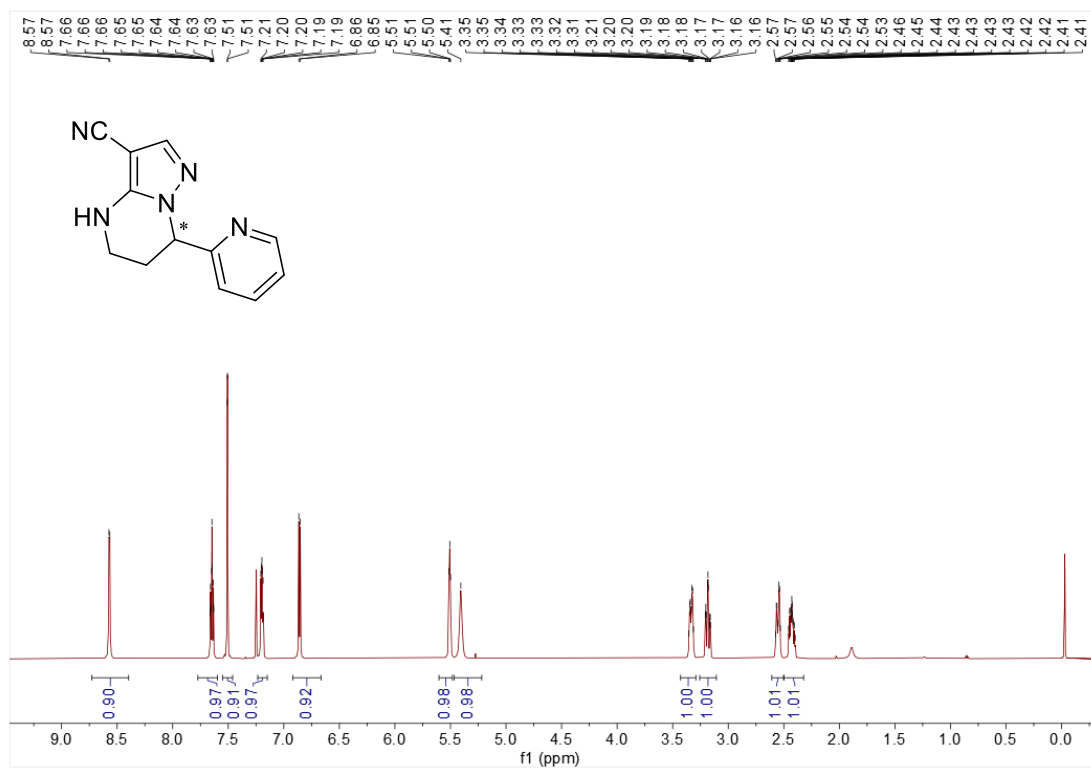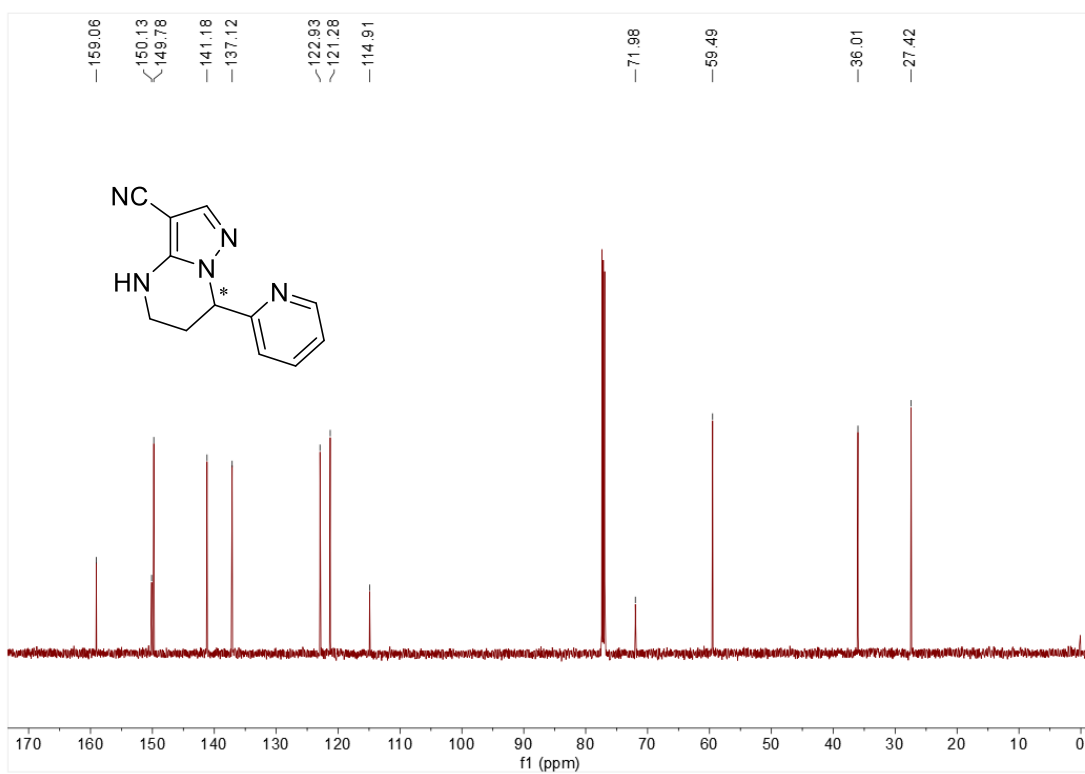

7-isopropyl-4,5,6,7-tetrahydropyrazolo[1,5-a]pyrimidine-3-carbonitrile (**2r**)

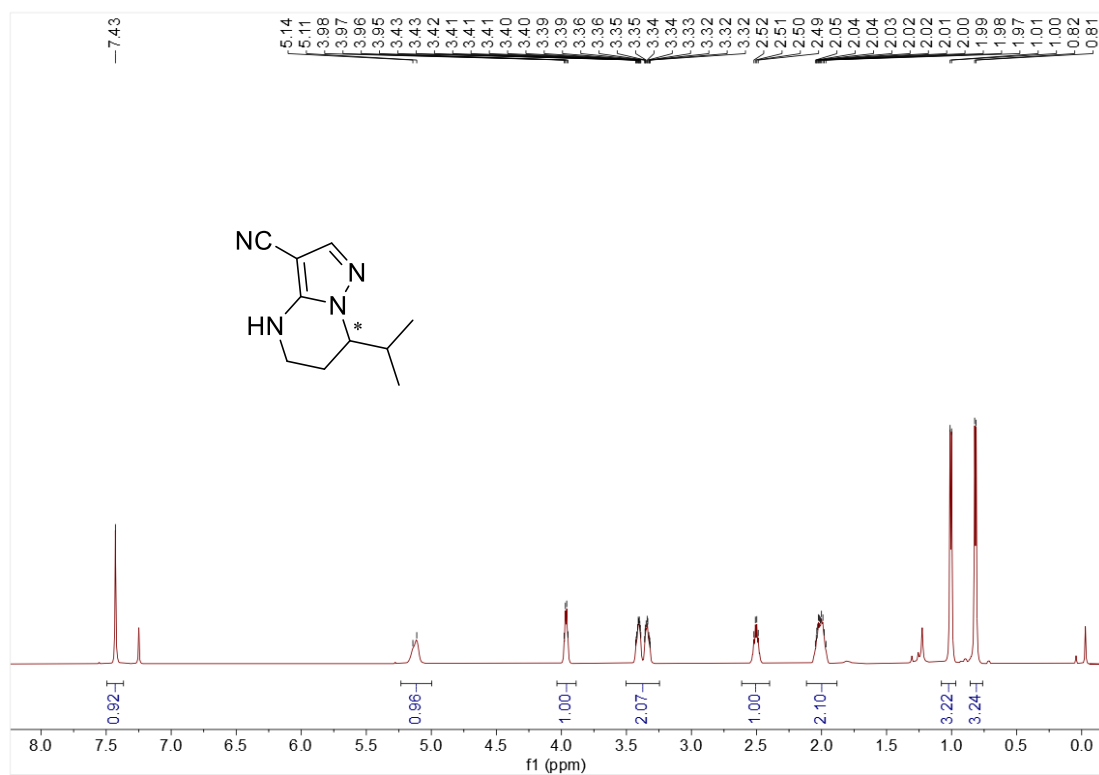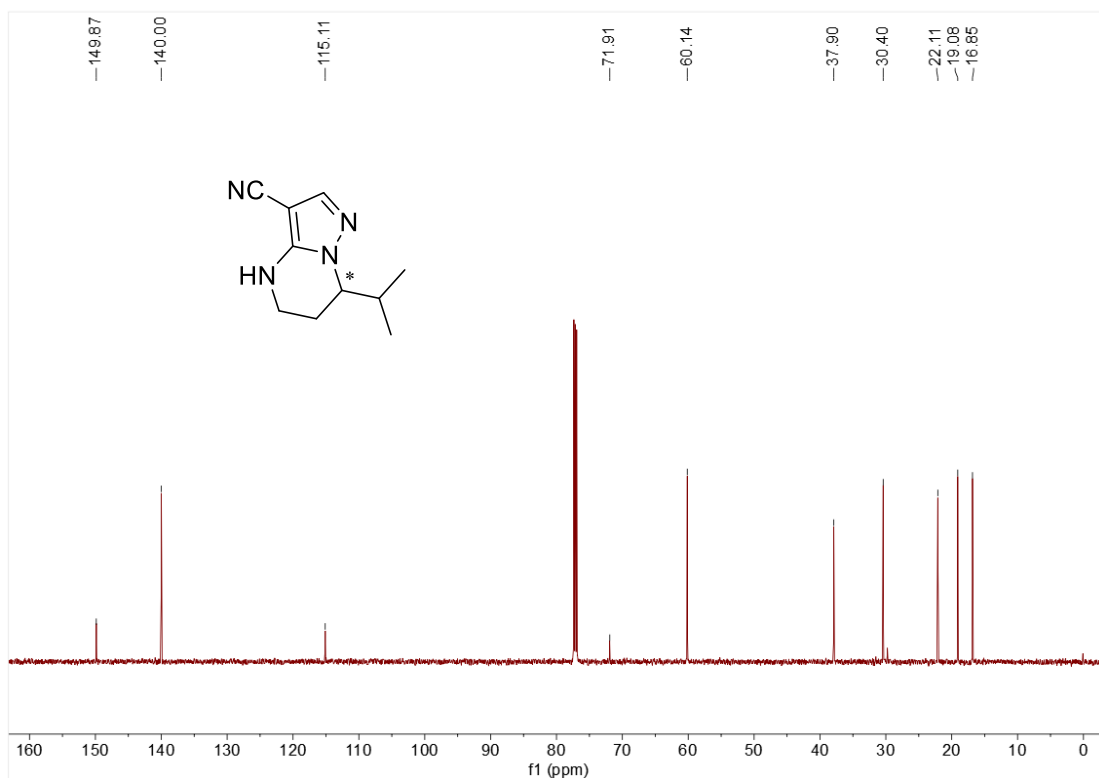

7-(*tert*-butyl)-4,5,6,7-tetrahydropyrazolo[1,5-*a*]pyrimidine-3-carbonitrile (**2s**)

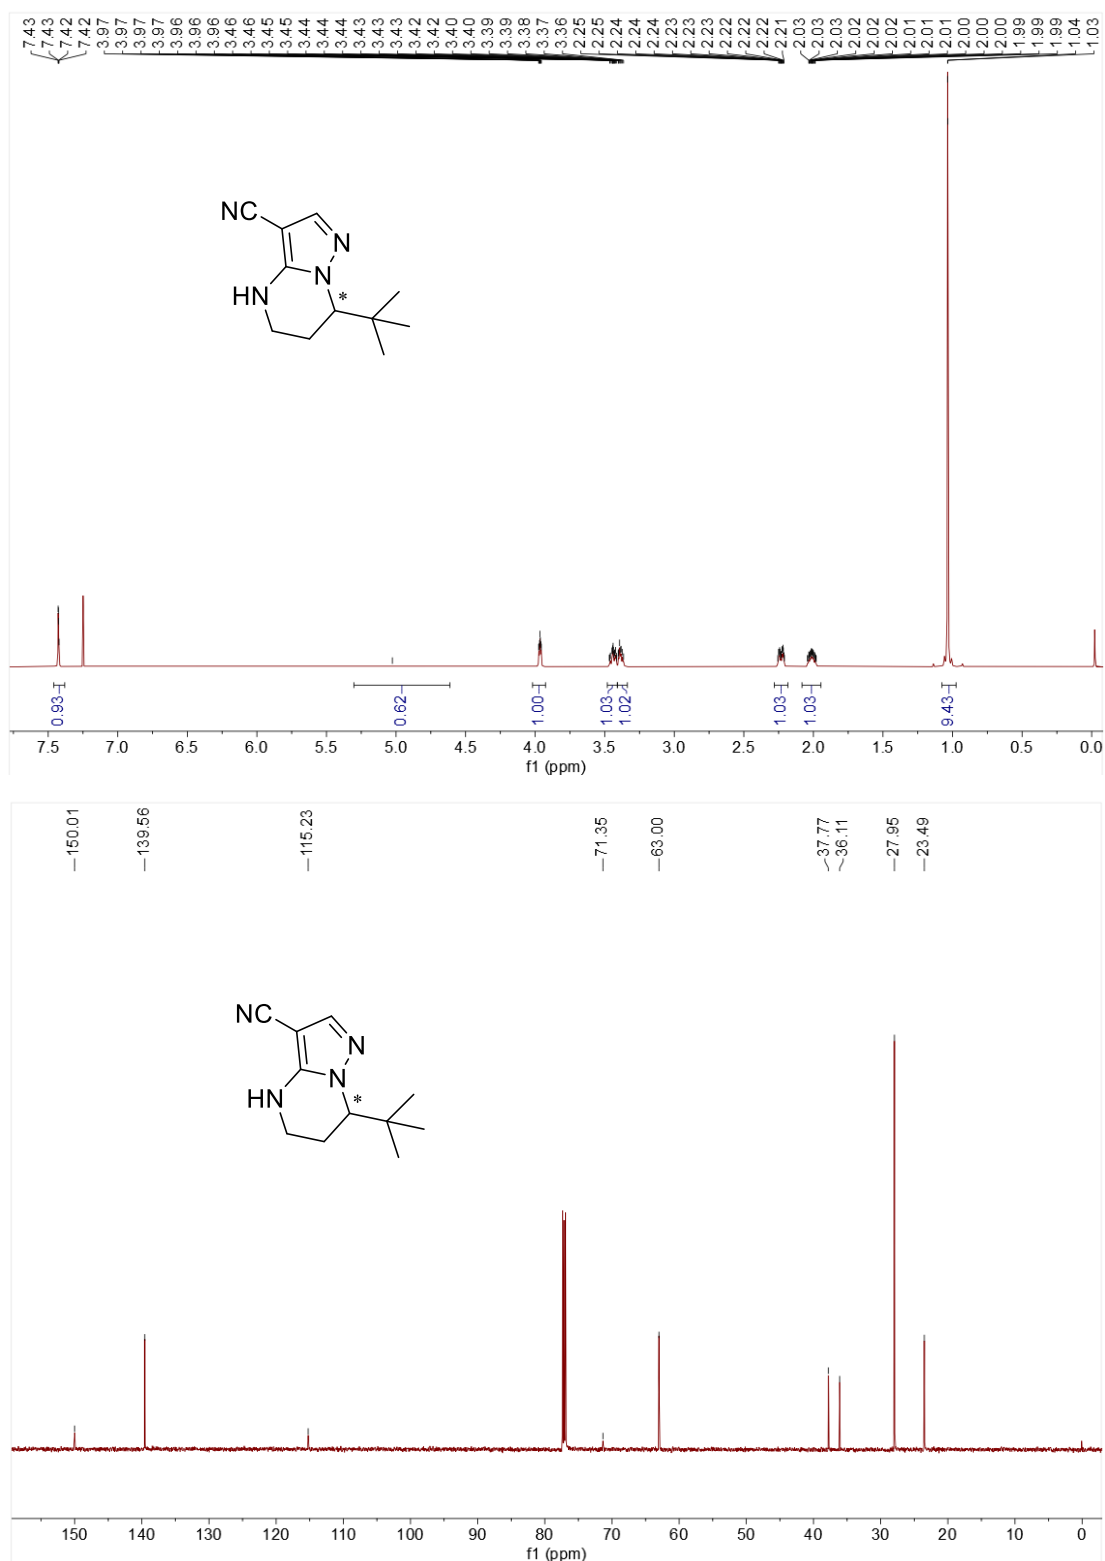

*tert*-butyl 4-(3-cyano-2-(4-phenoxyphenyl)-4,5,6,7-tetrahydropyrazolo[1,5-*a*]pyrimidin-7-yl)piperidine-1-carboxylate (**2t**)

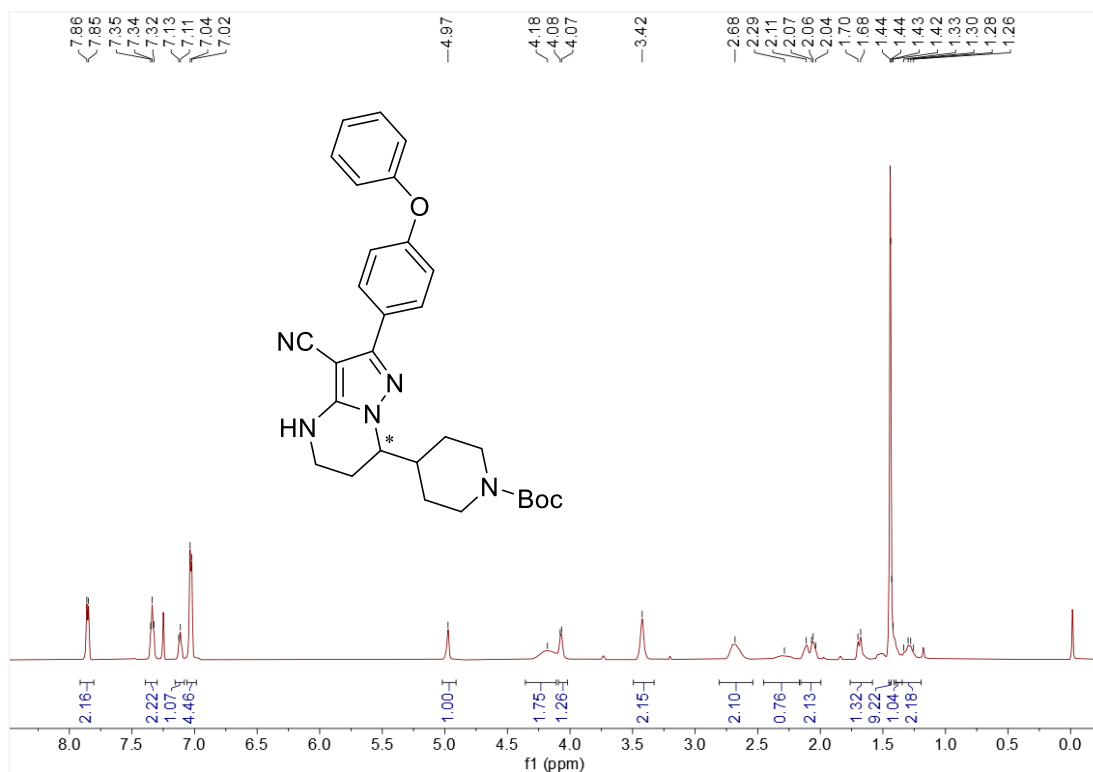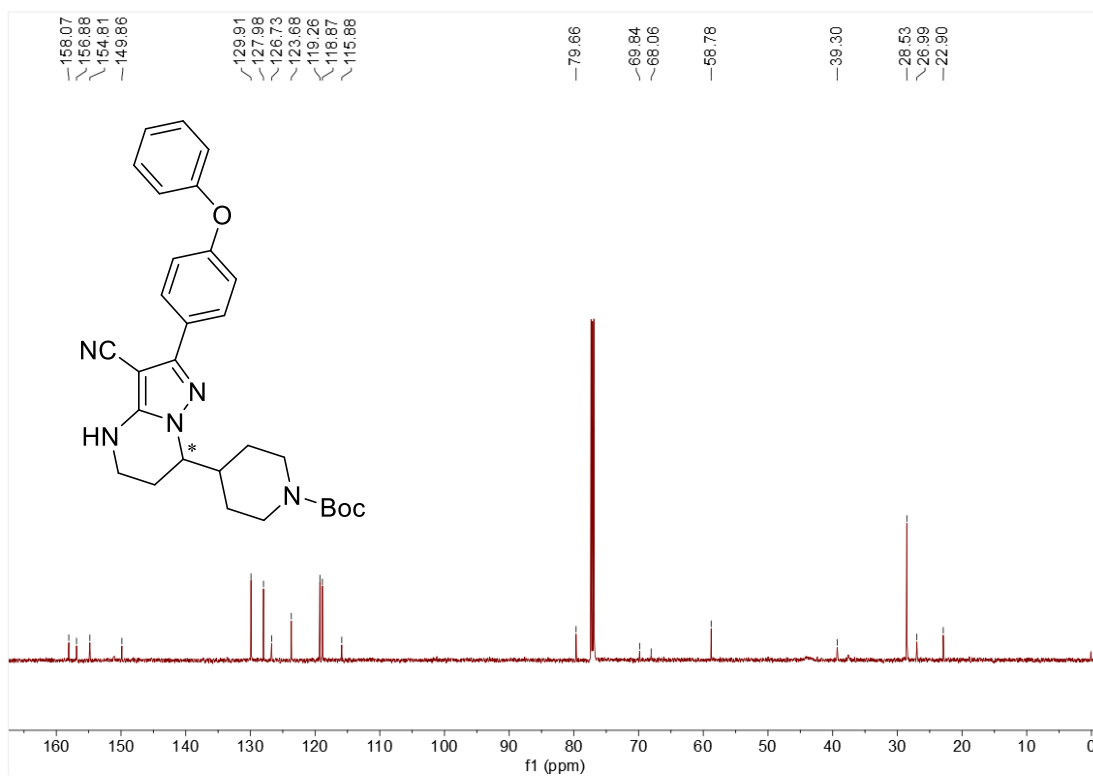

2,7-diphenyl-4,5,6,7-tetrahydropyrazolo[1,5-a]pyrimidine (**4a**)

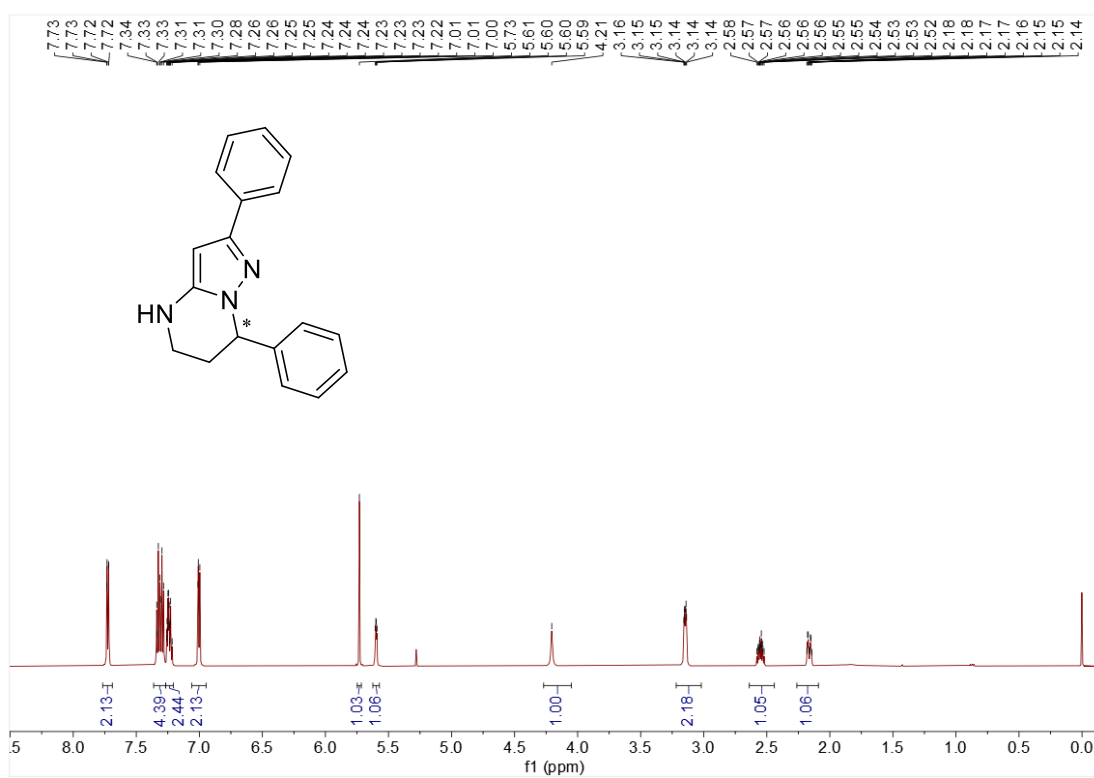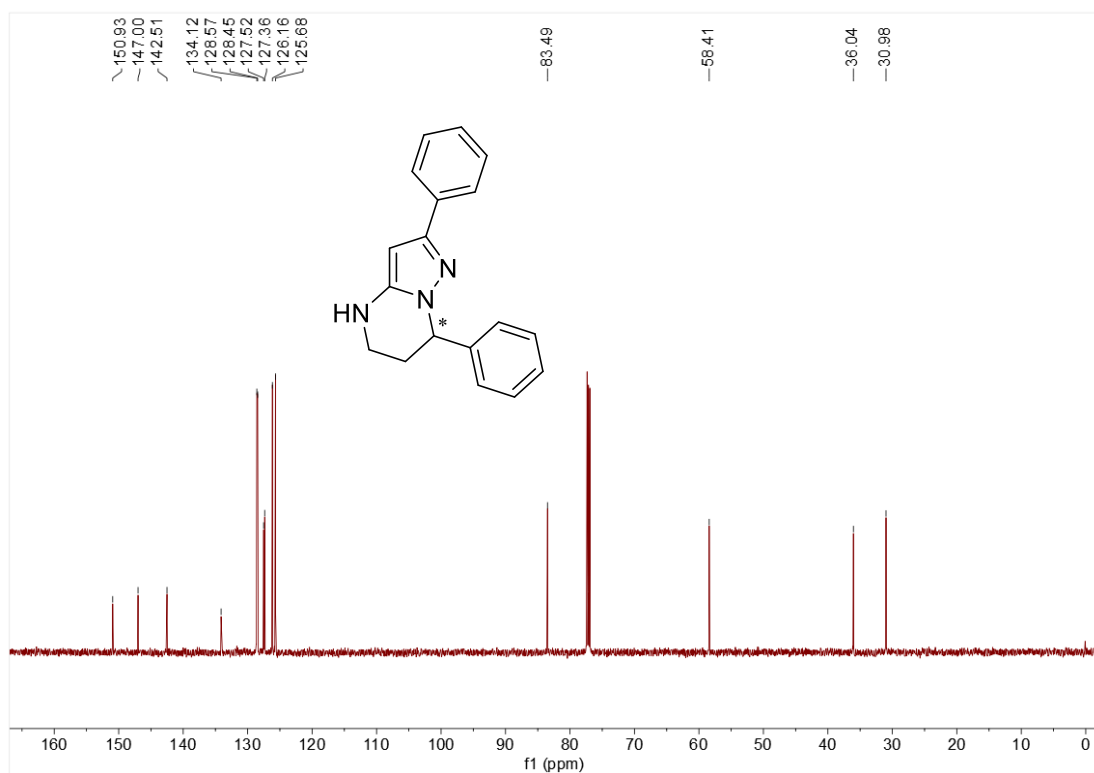

7-phenyl-2-(*o*-tolyl)-4,5,6,7-tetrahydropyrazolo[1,5-*a*]pyrimidine (**4b**)

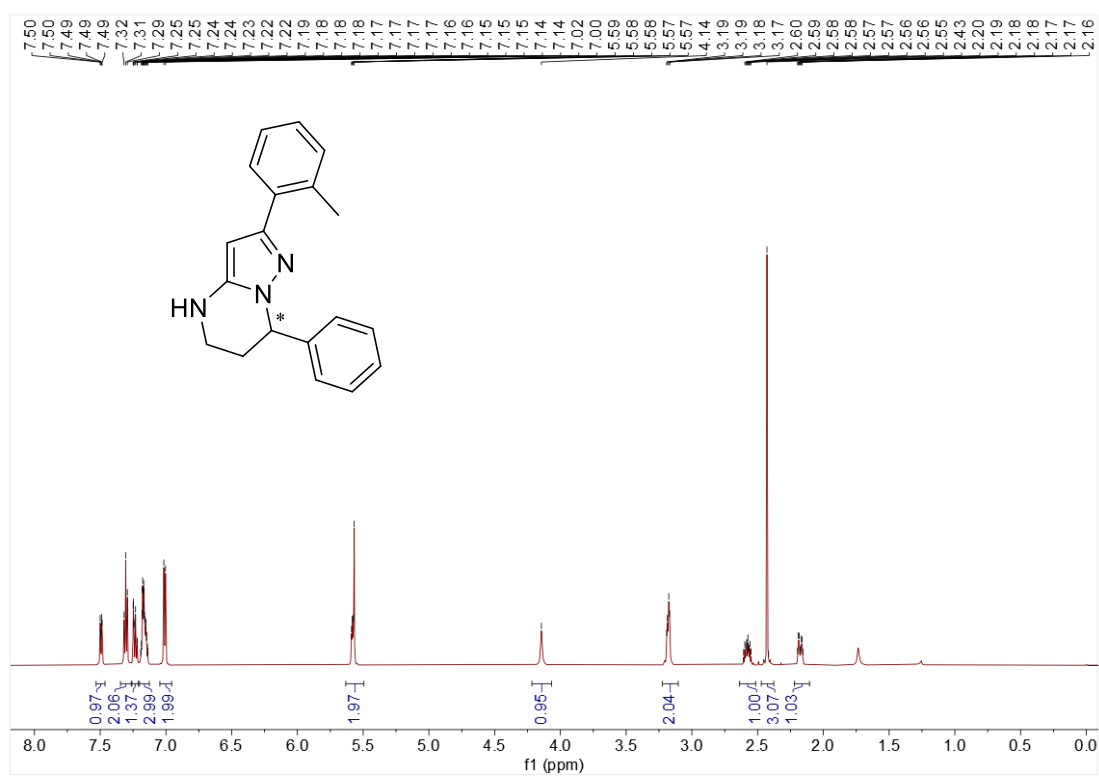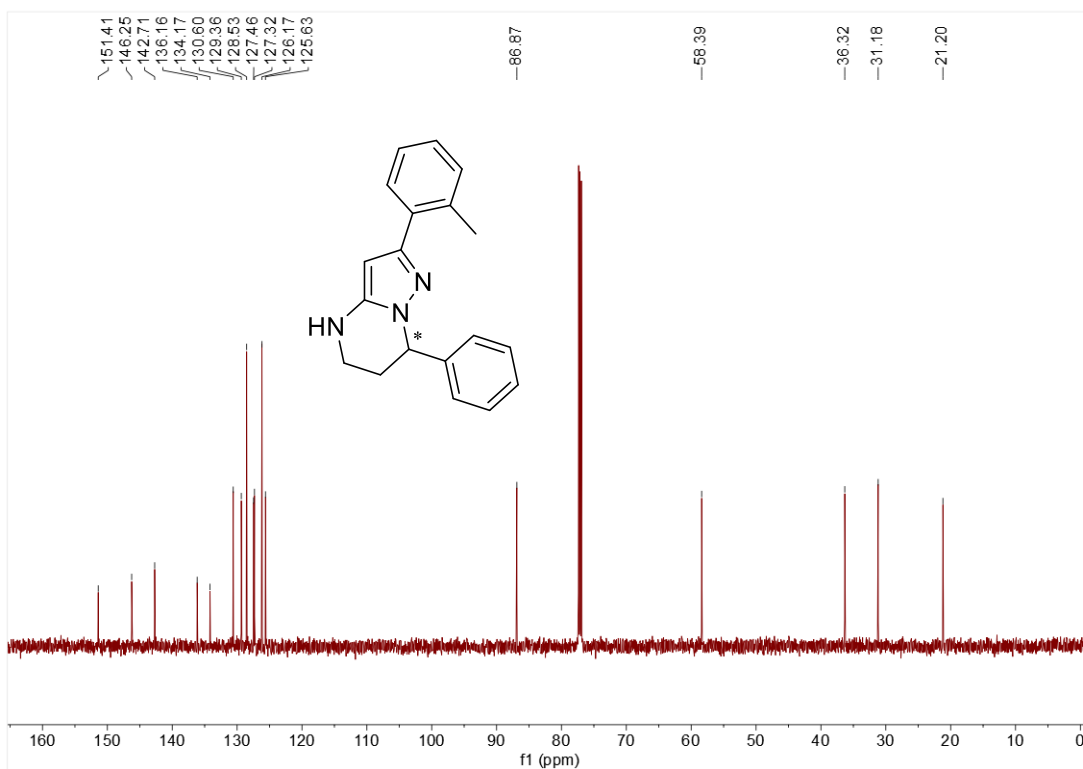



2-(2-methoxyphenyl)-7-phenyl-4,5,6,7-tetrahydropyrazolo[1,5-a]pyrimidine (**4c**)

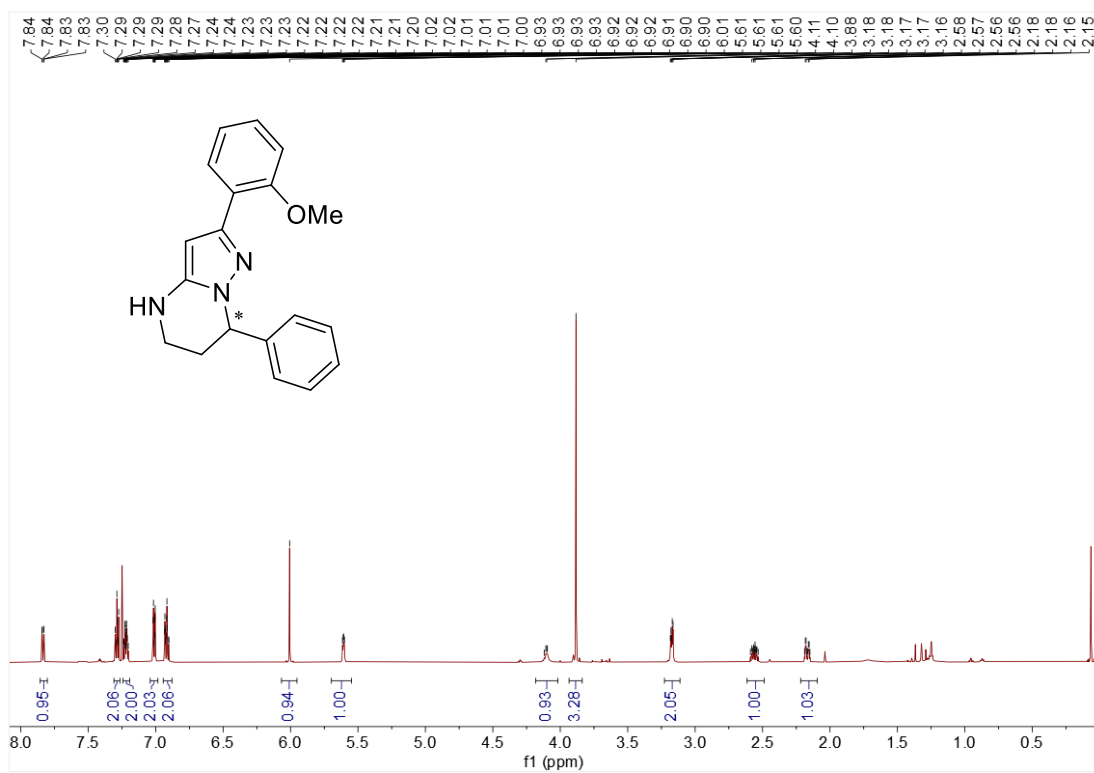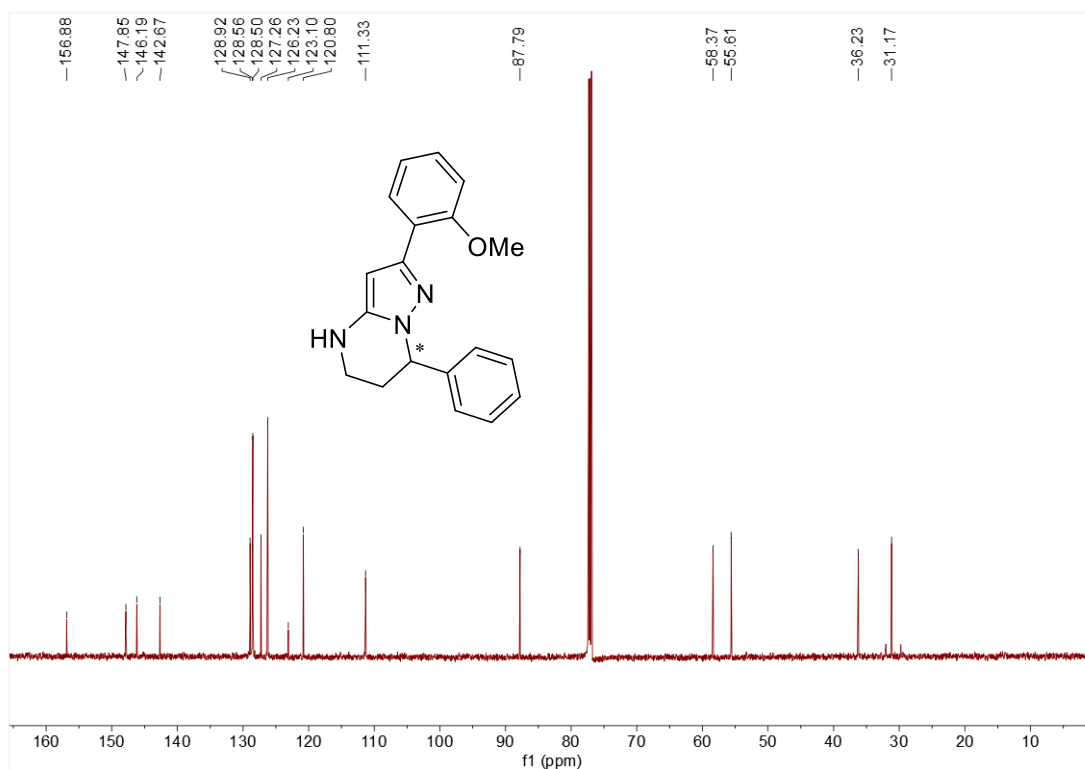

7-phenyl-2-(*m*-tolyl)-4,5,6,7-tetrahydropyrazolo[1,5-*a*]pyrimidine (**4d**)

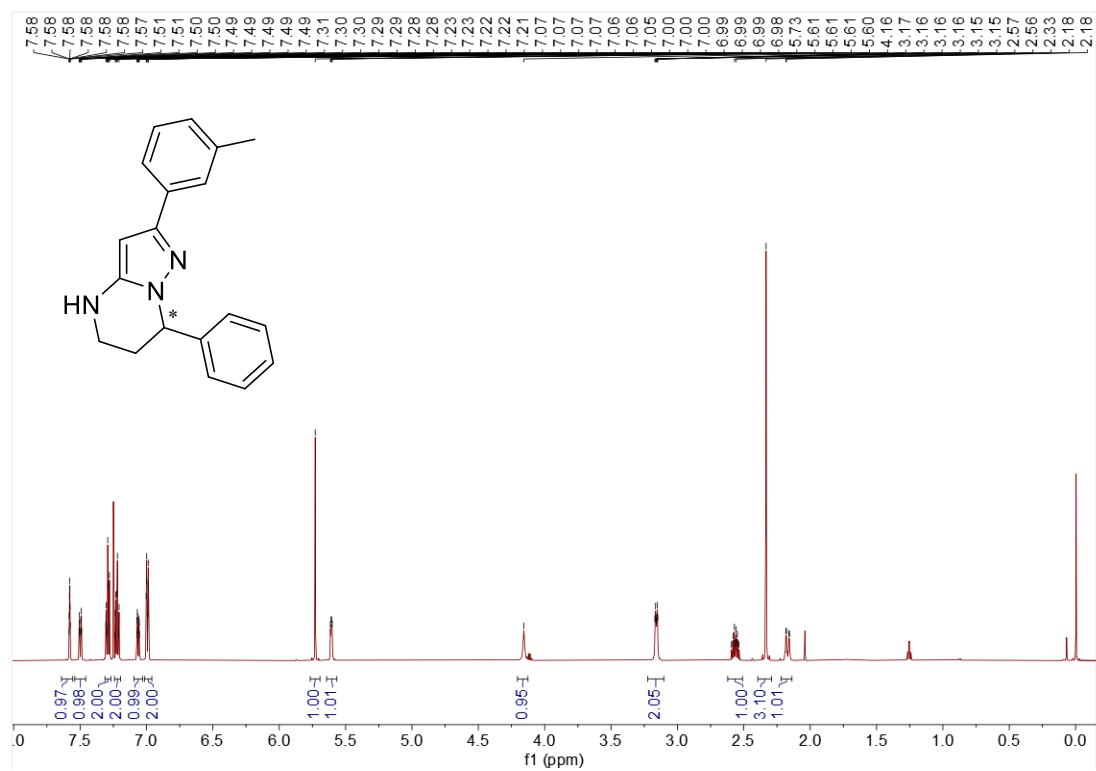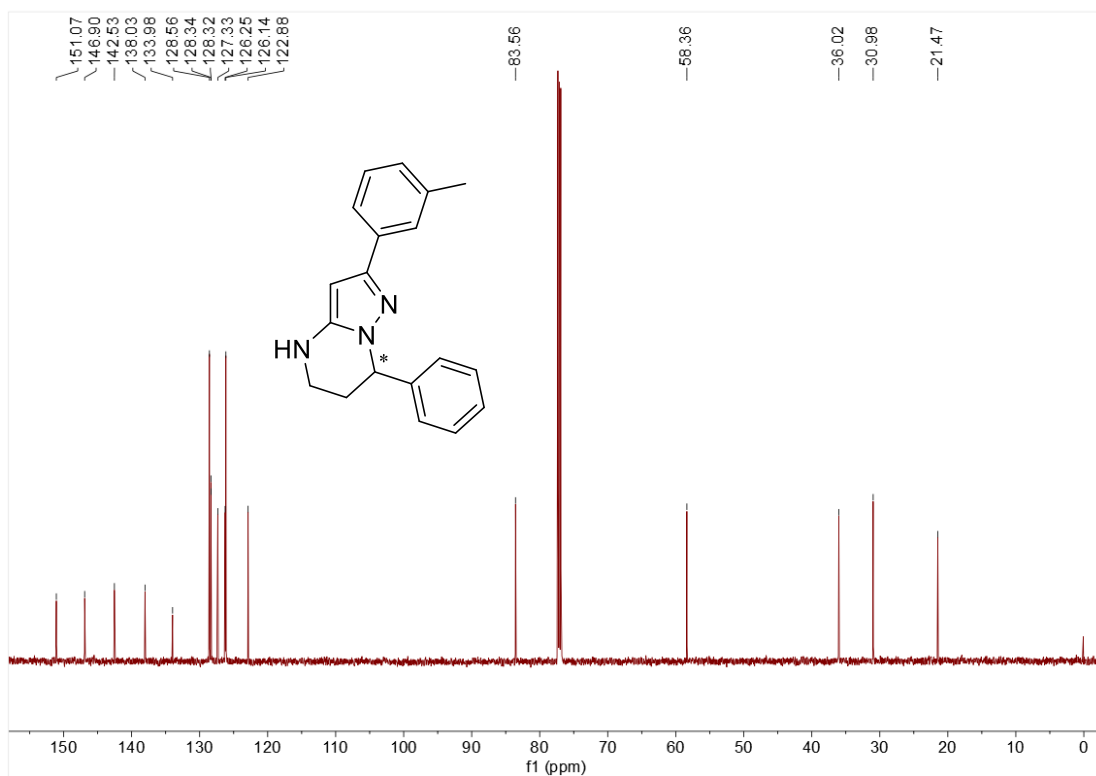

7-phenyl-2-(*p*-tolyl)-4,5,6,7-tetrahydropyrazolo[1,5-*a*]pyrimidine (**4e**)

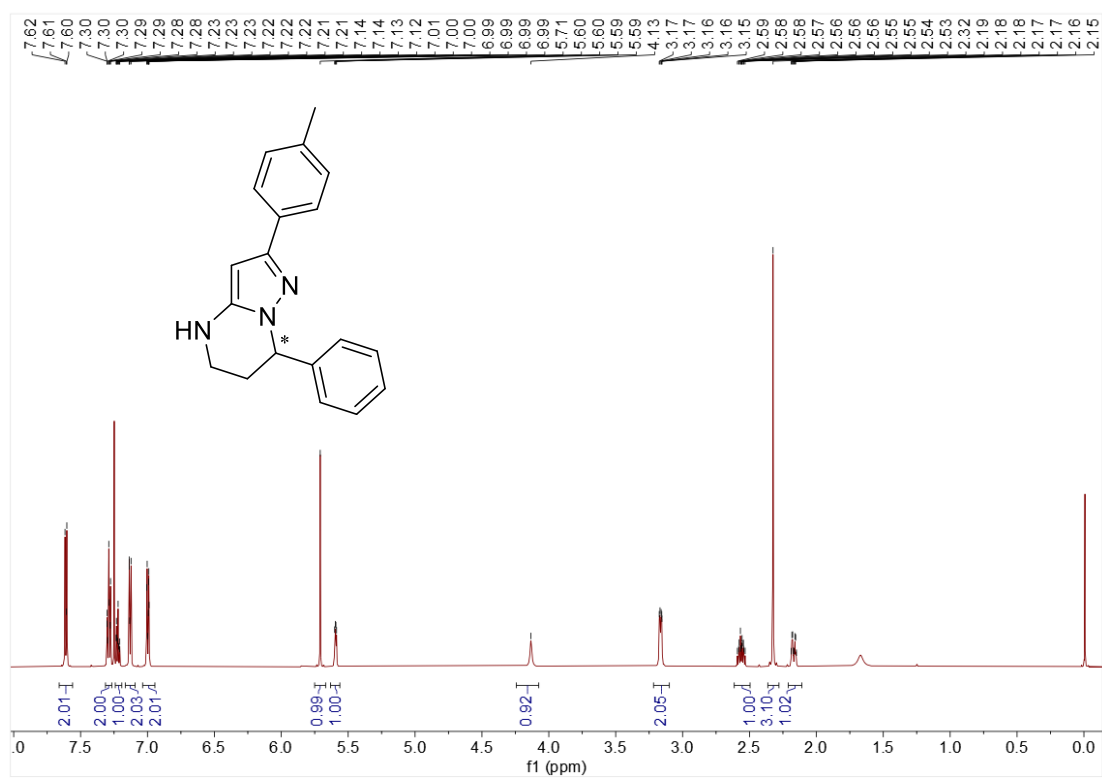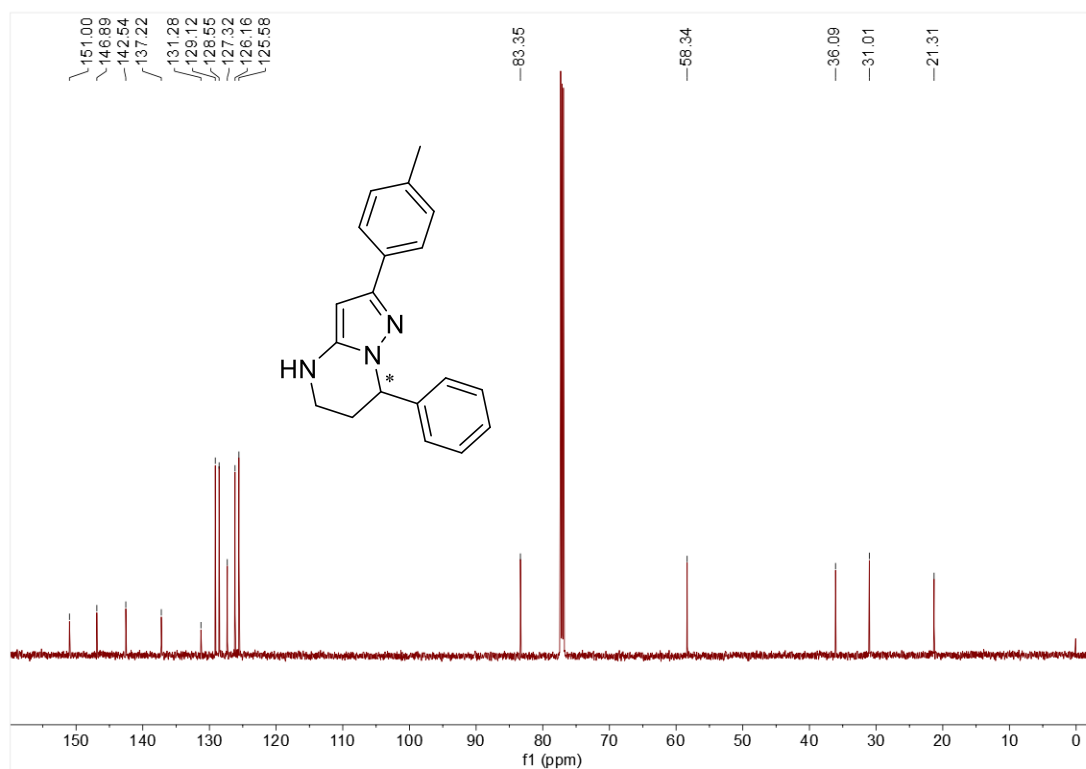

2-(4-methoxyphenyl)-7-phenyl-4,5,6,7-tetrahydropyrazolo[1,5-*a*]pyrimidine (**4f**)

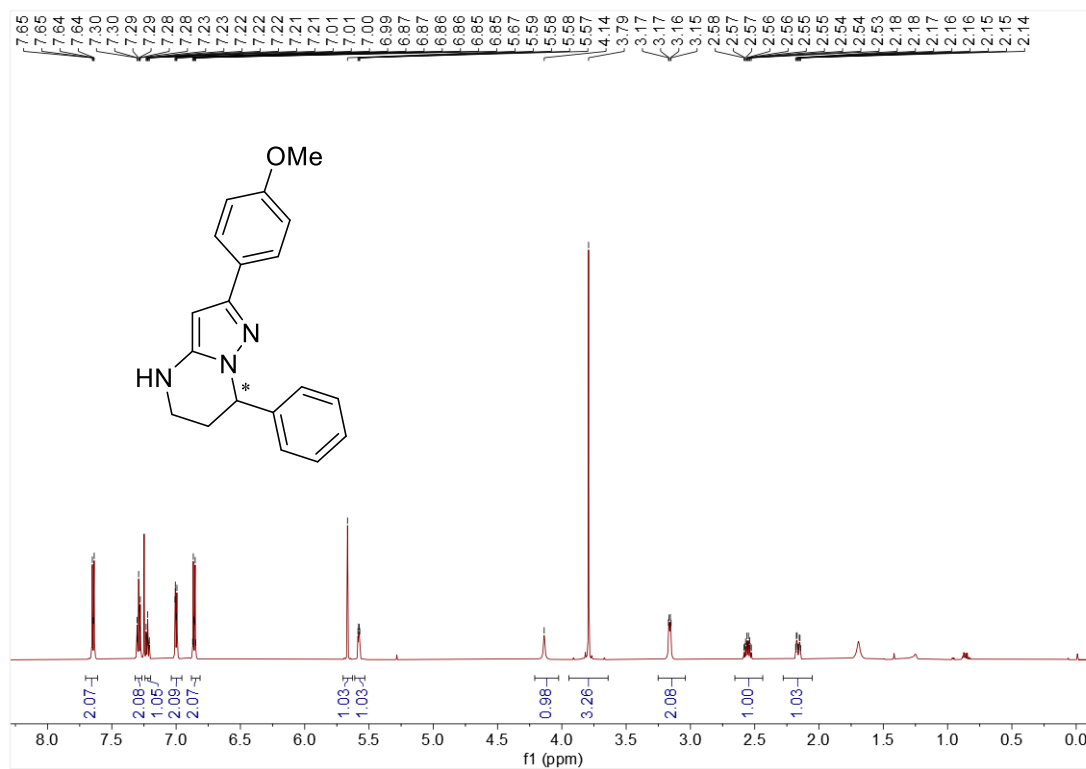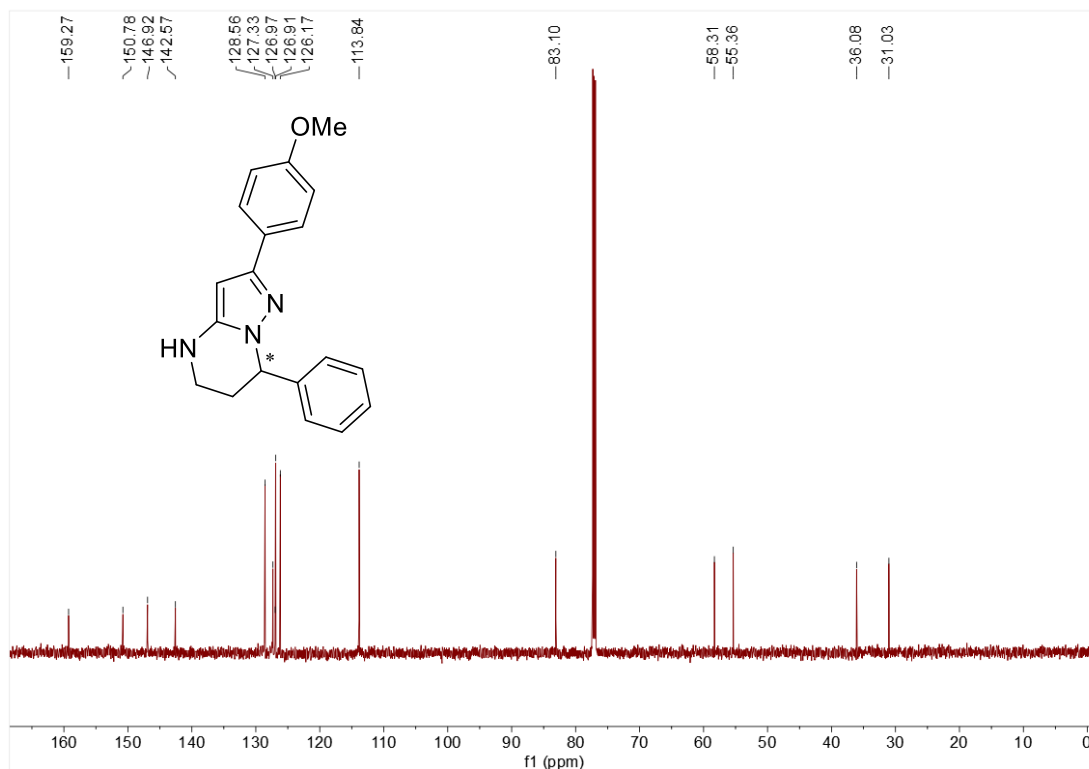

2-(2-chlorophenyl)-7-phenyl-4,5,6,7-tetrahydropyrazolo[1,5-a]pyrimidine (**4g**)

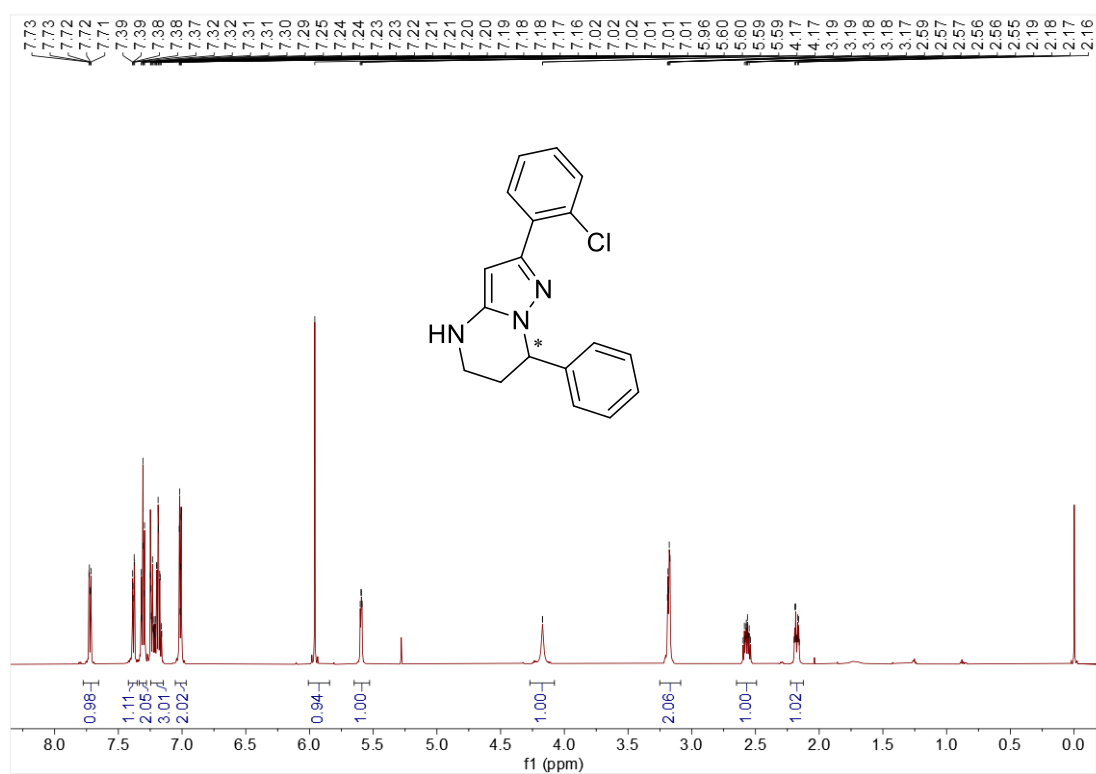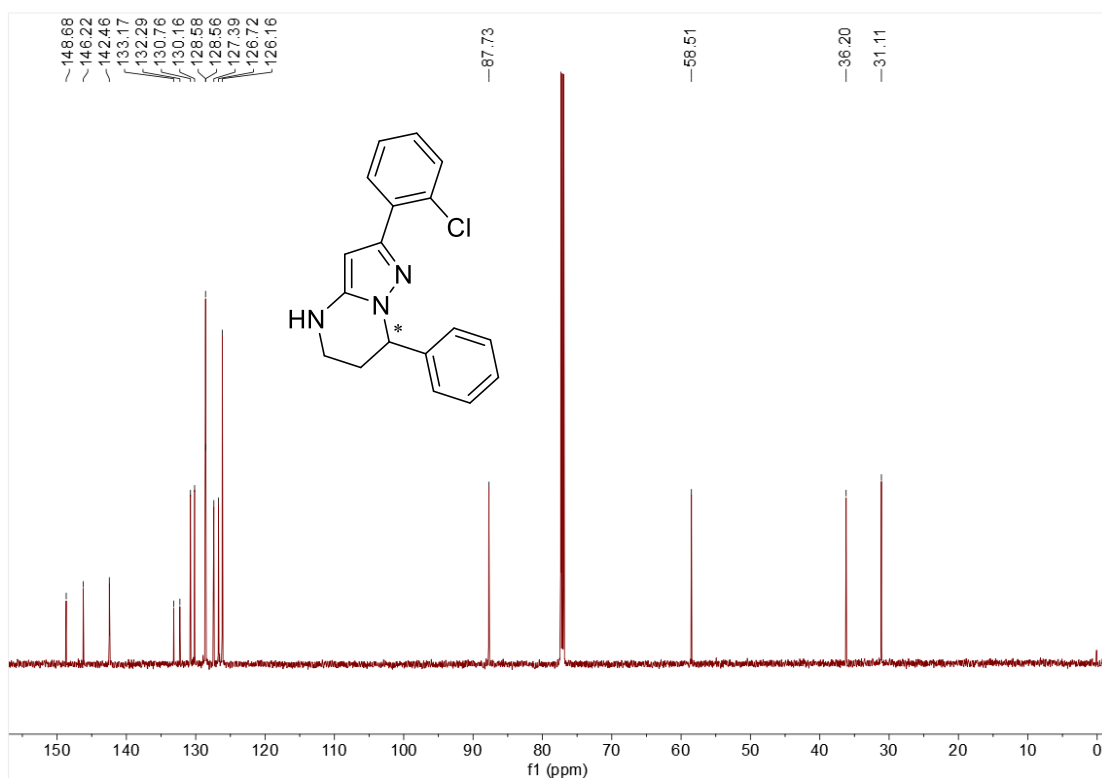

2-(3-fluorophenyl)-7-phenyl-4,5,6,7-tetrahydropyrazolo[1,5-a]pyrimidine (**4h**)

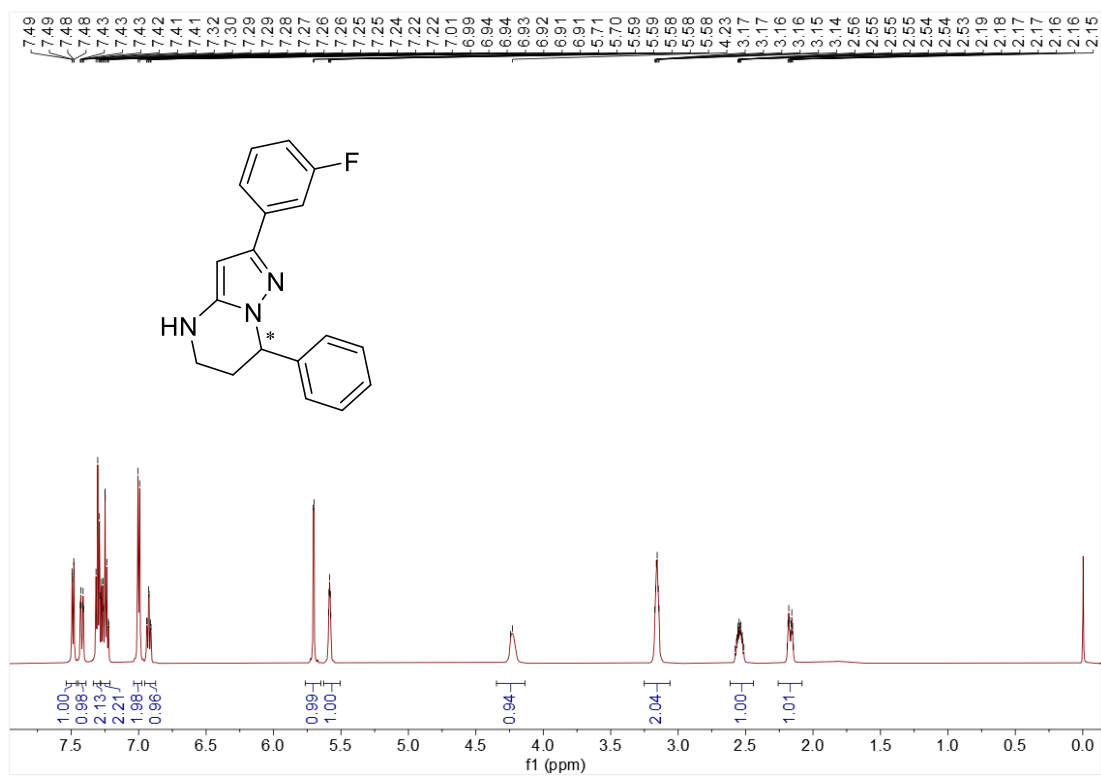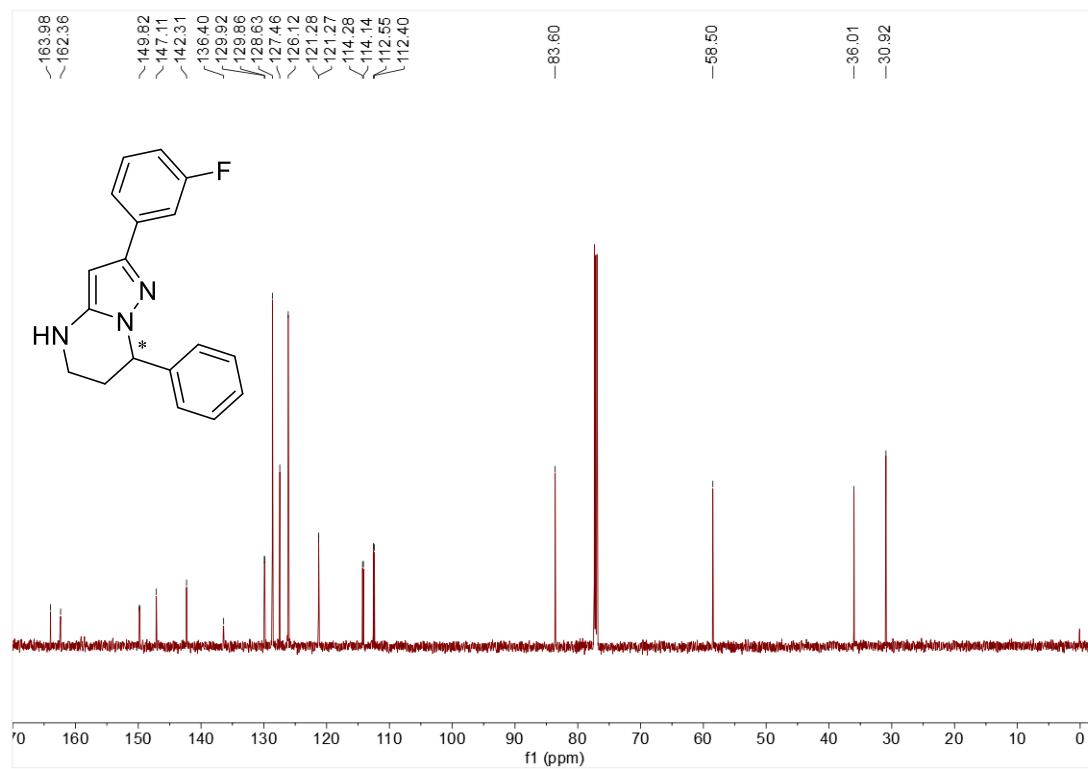



2-(4-chlorophenyl)-7-phenyl-4,5,6,7-tetrahydropyrazolo[1,5-a]pyrimidine (**4j**)

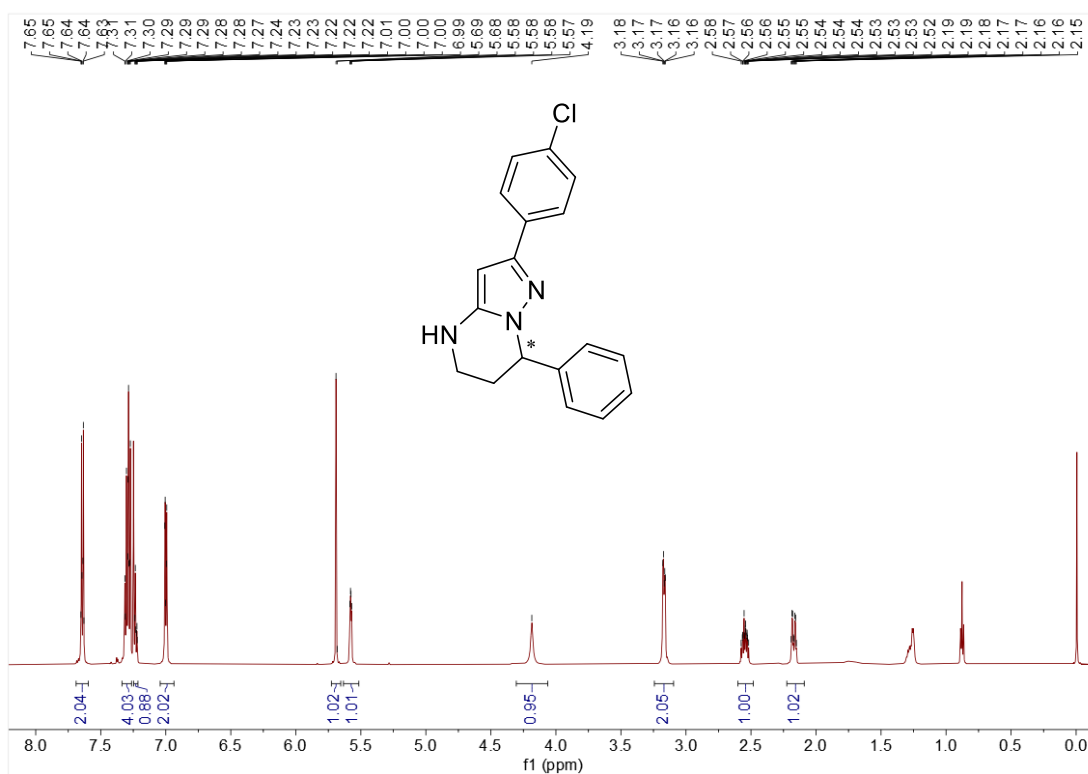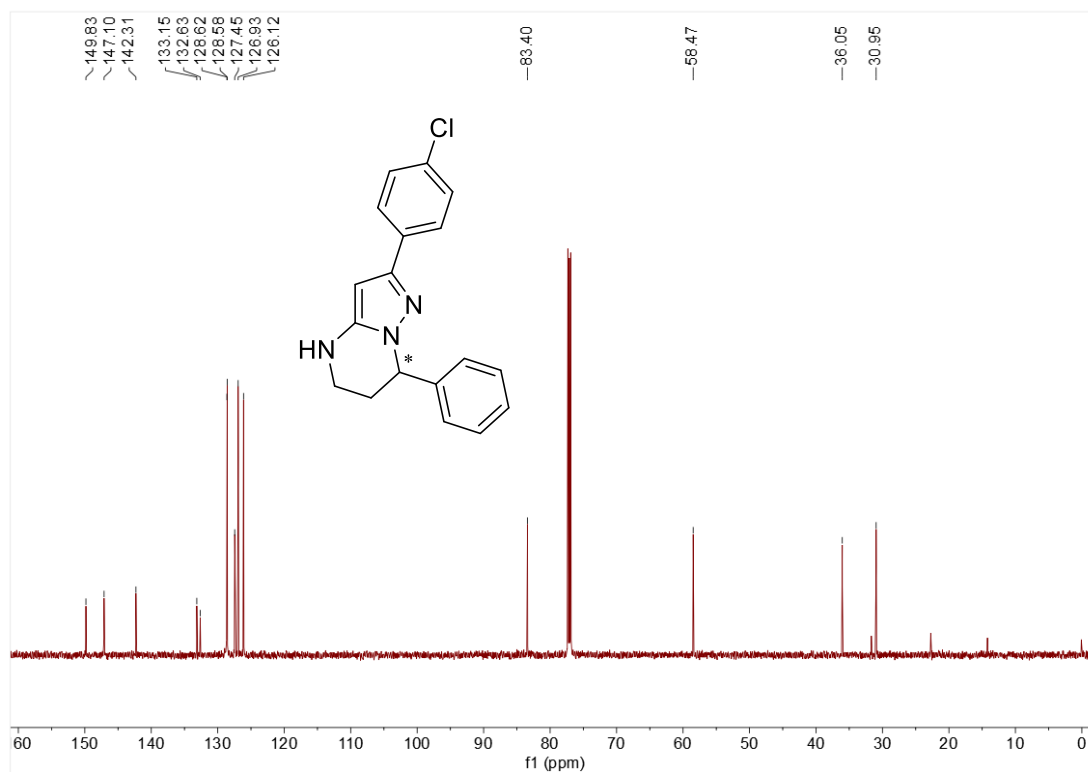



2-(4-bromophenyl)-7-phenyl-4,5,6,7-tetrahydropyrazolo[1,5-a]pyrimidine (**4k**)

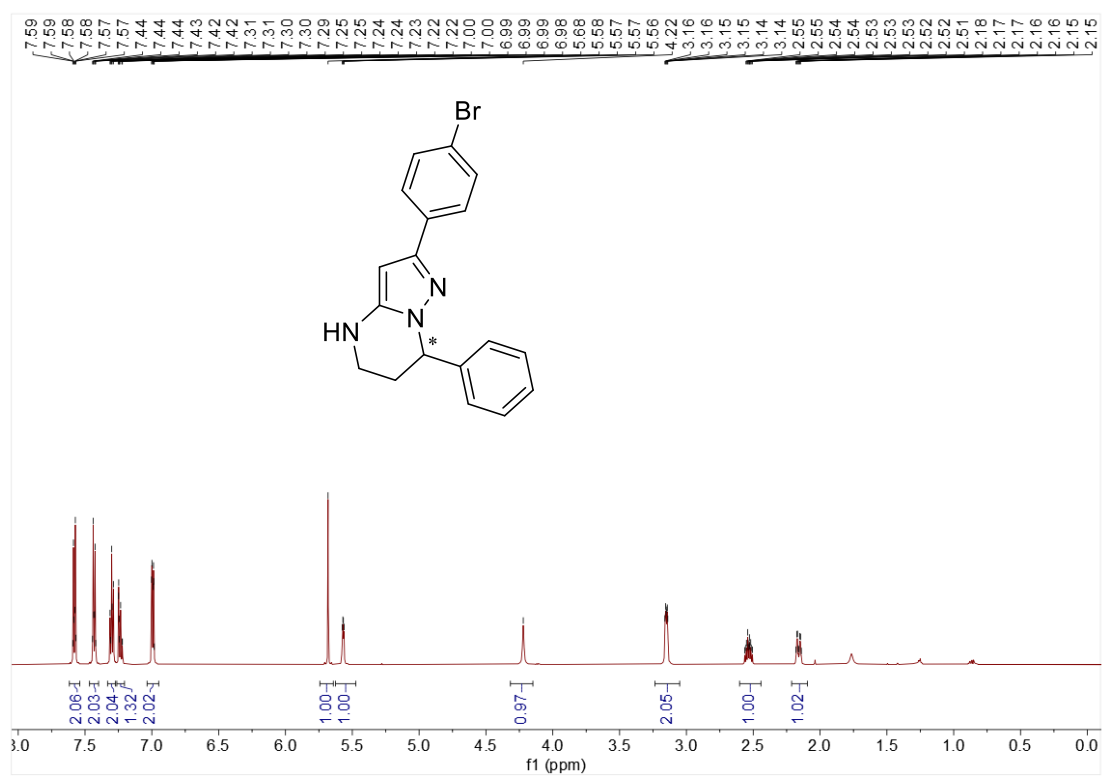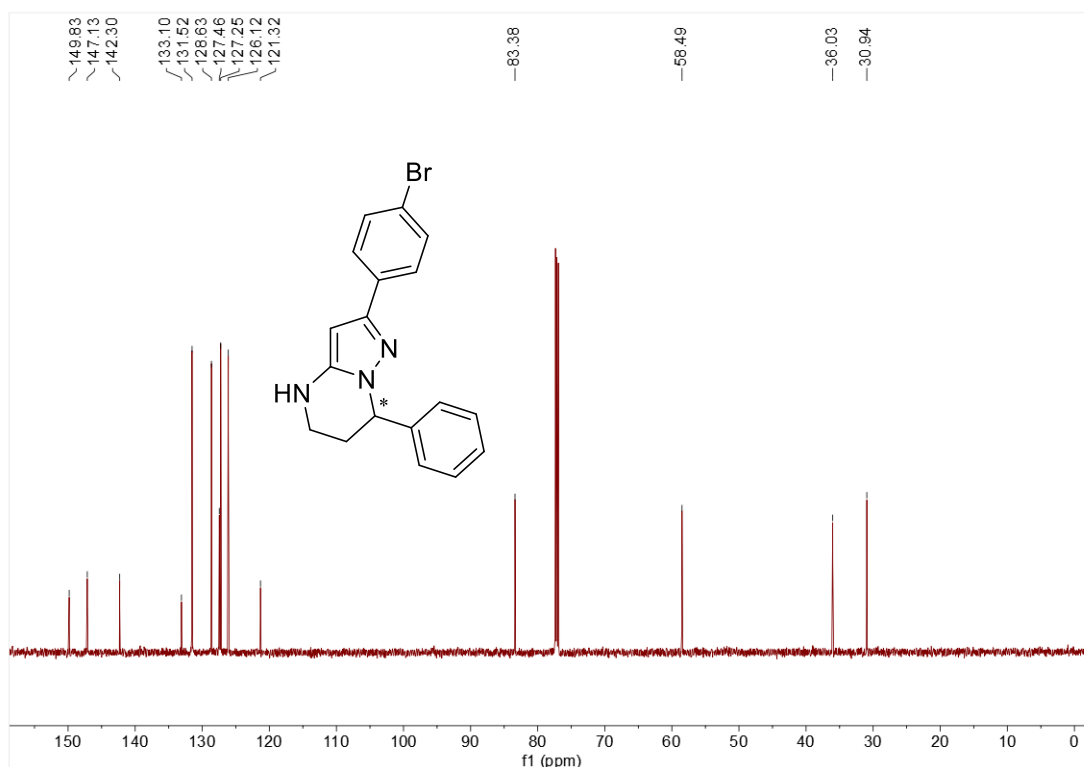

7-phenyl-2-(4-(trifluoromethyl)phenyl)-4,5,6,7-tetrahydropyrazolo[1,5-a]pyrimidine

(41)

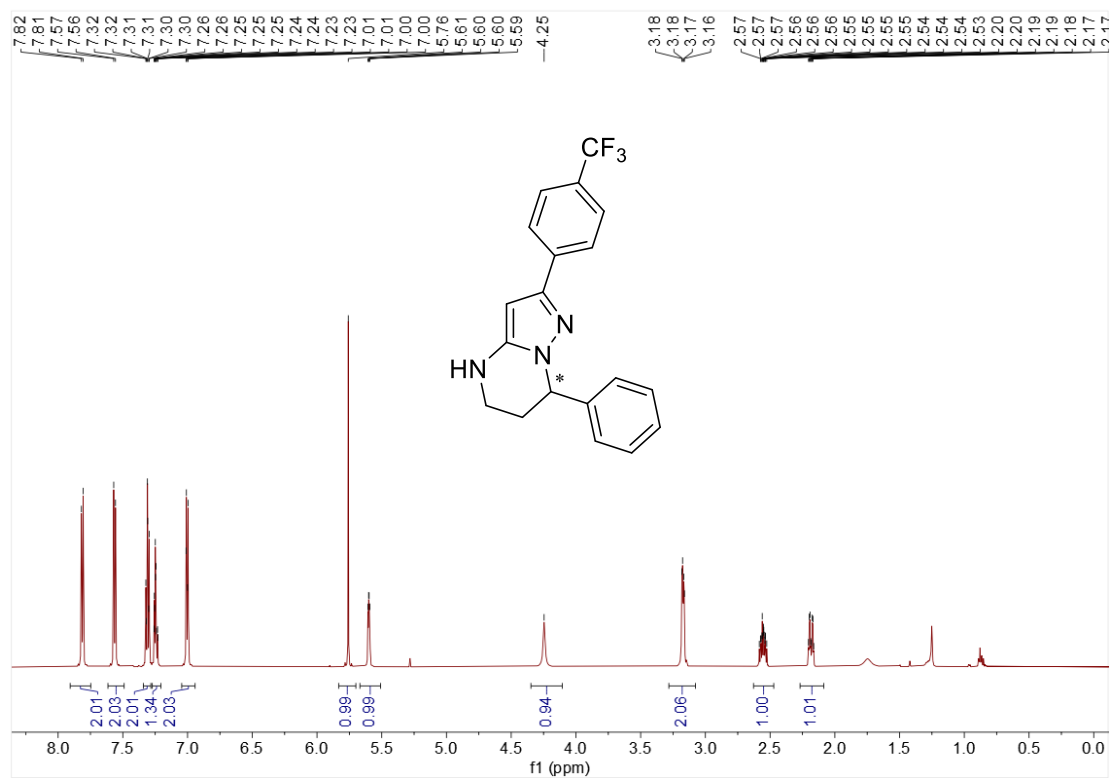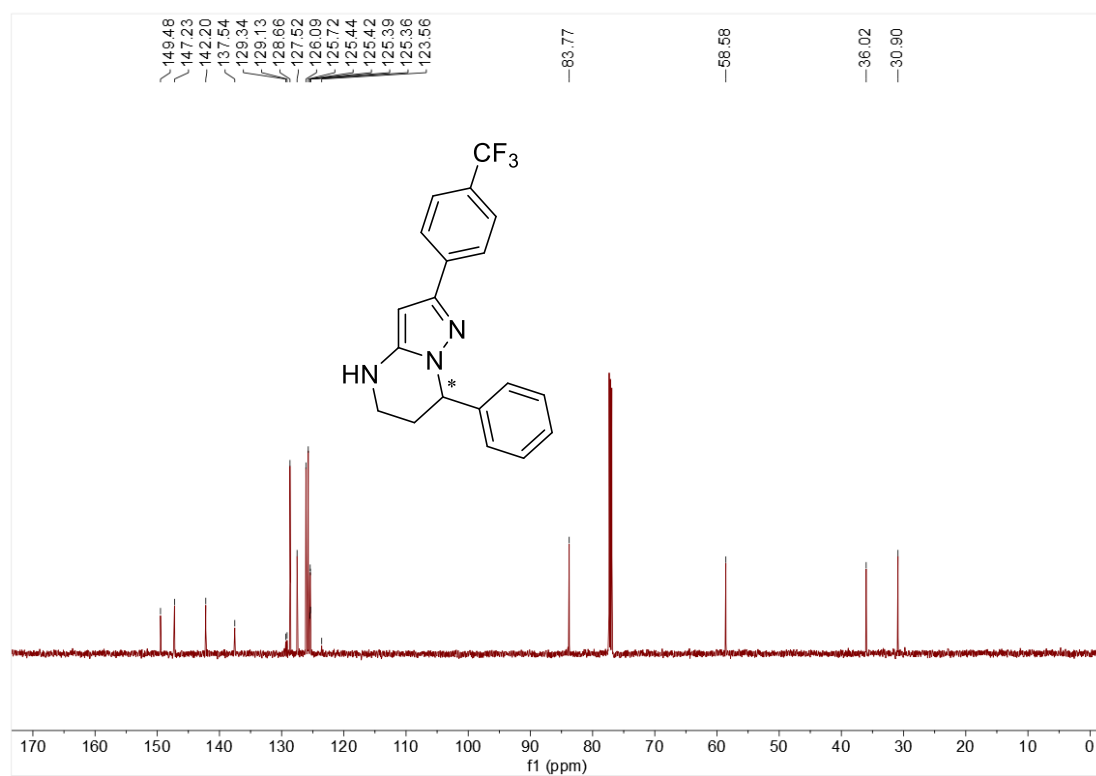

2-(naphthalen-2-yl)-7-phenyl-4,5,6,7-tetrahydropyrazolo[1,5-a]pyrimidine (**4m**)

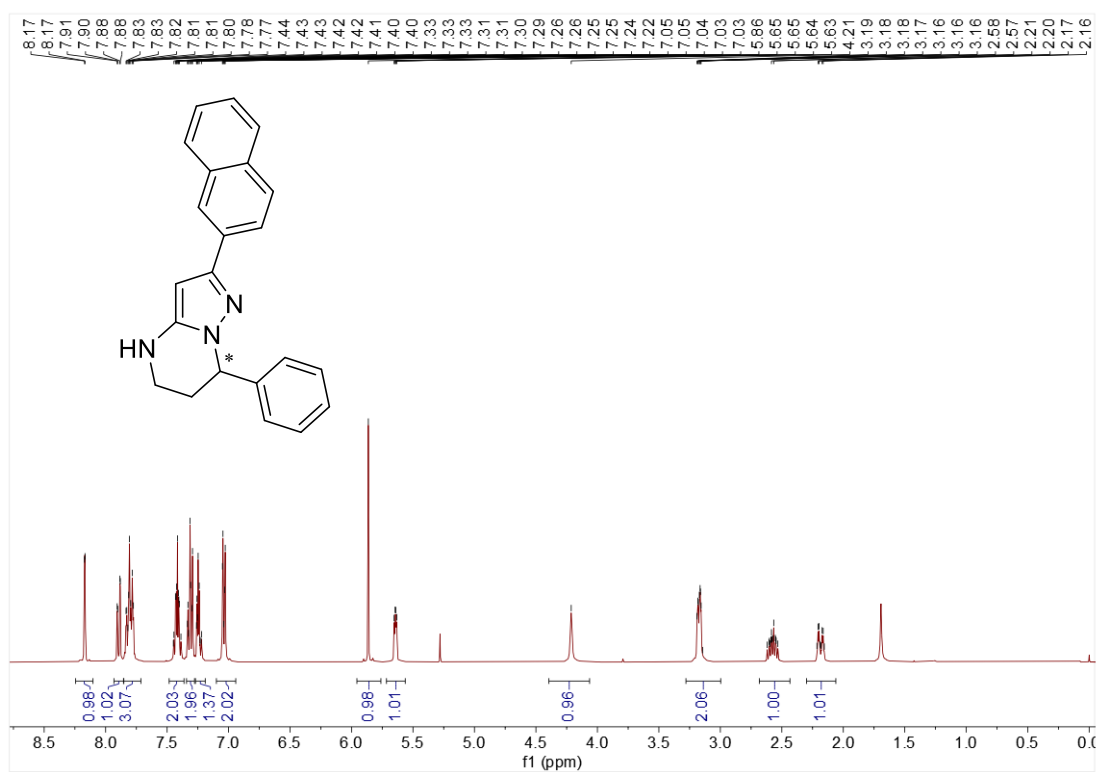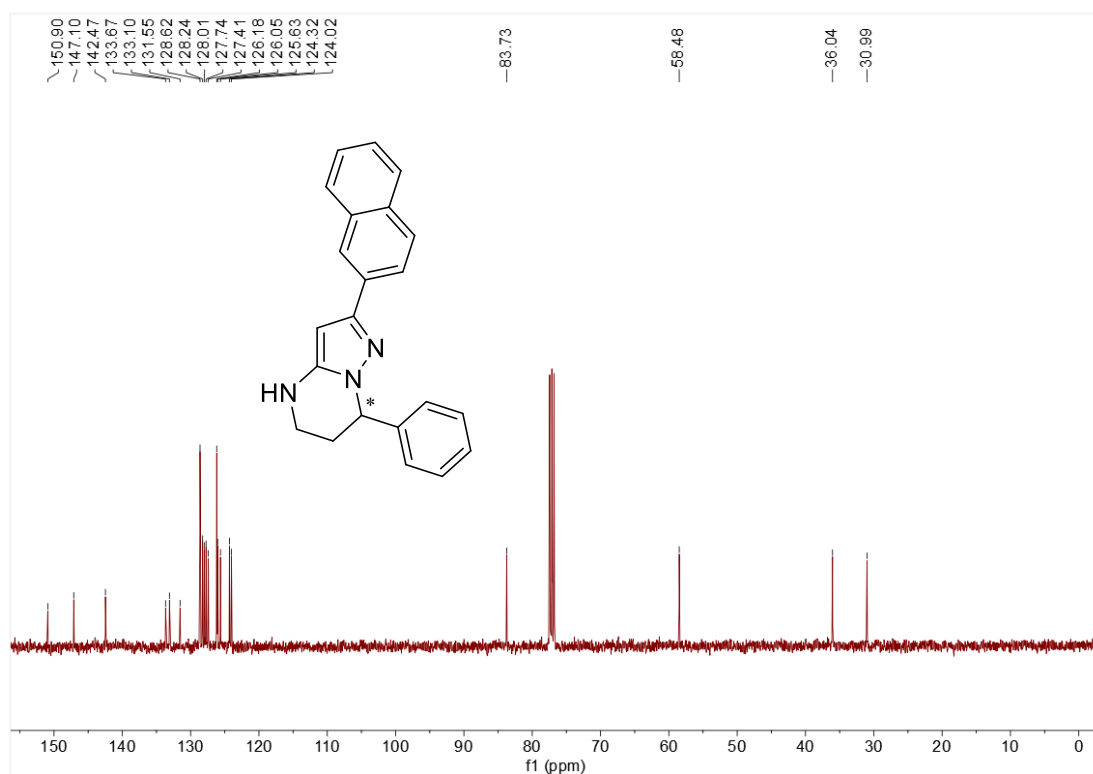

7-phenyl-2-(thiophen-2-yl)-4,5,6,7-tetrahydropyrazolo[1,5-a]pyrimidine (**4n**)

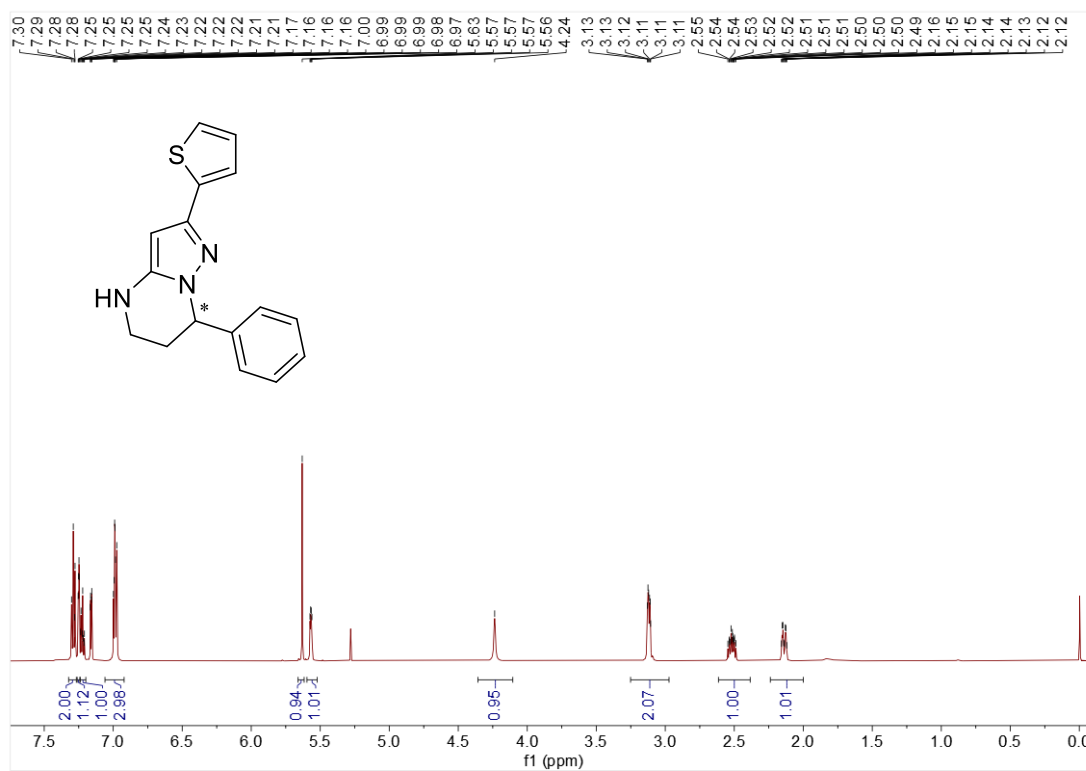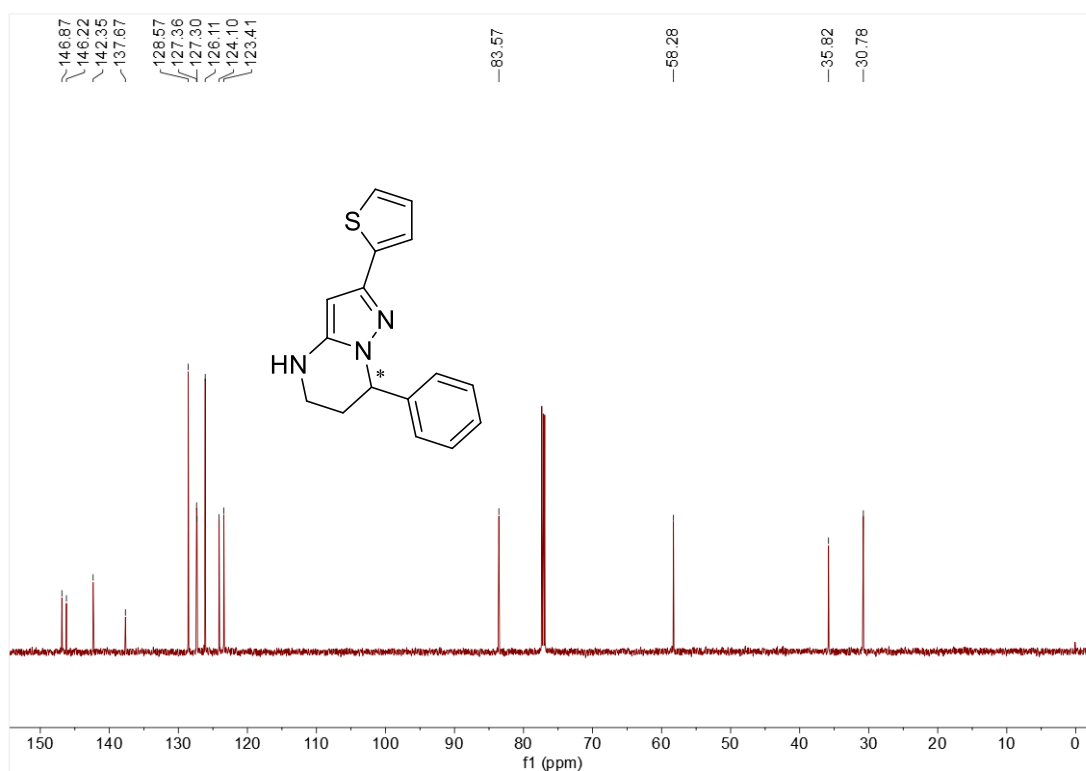

2-(furan-2-yl)-7-phenyl-4,5,6,7-tetrahydropyrazolo[1,5-a]pyrimidine (**4o**)

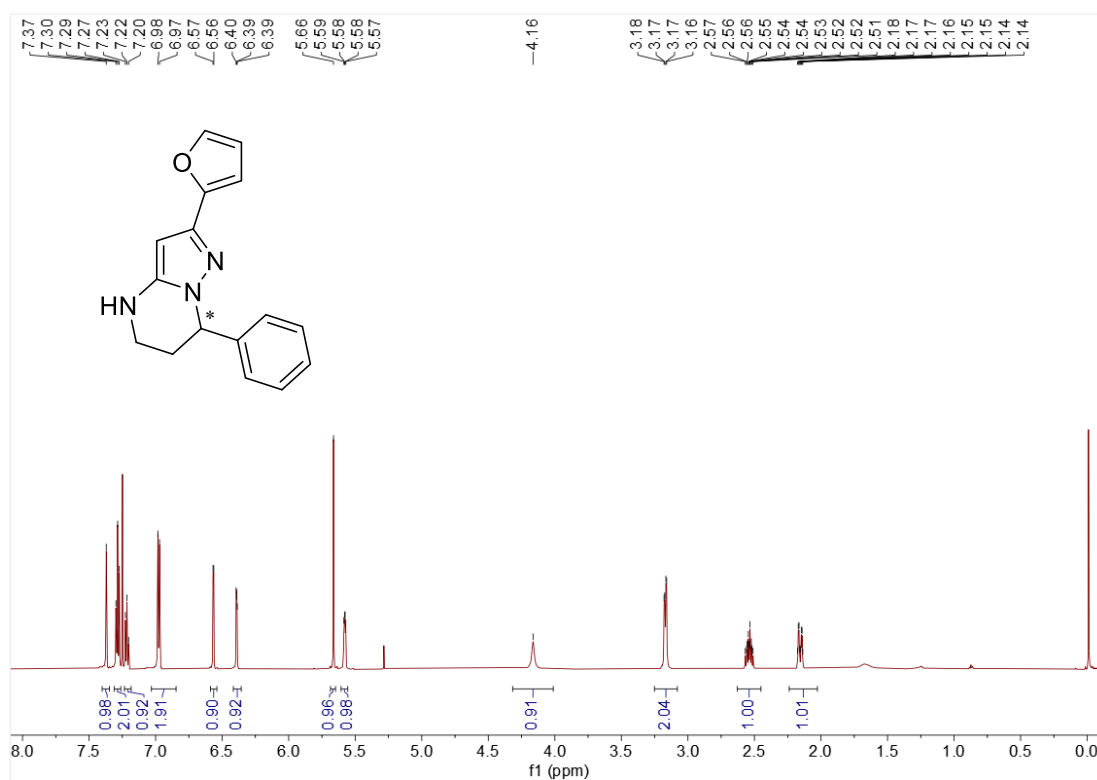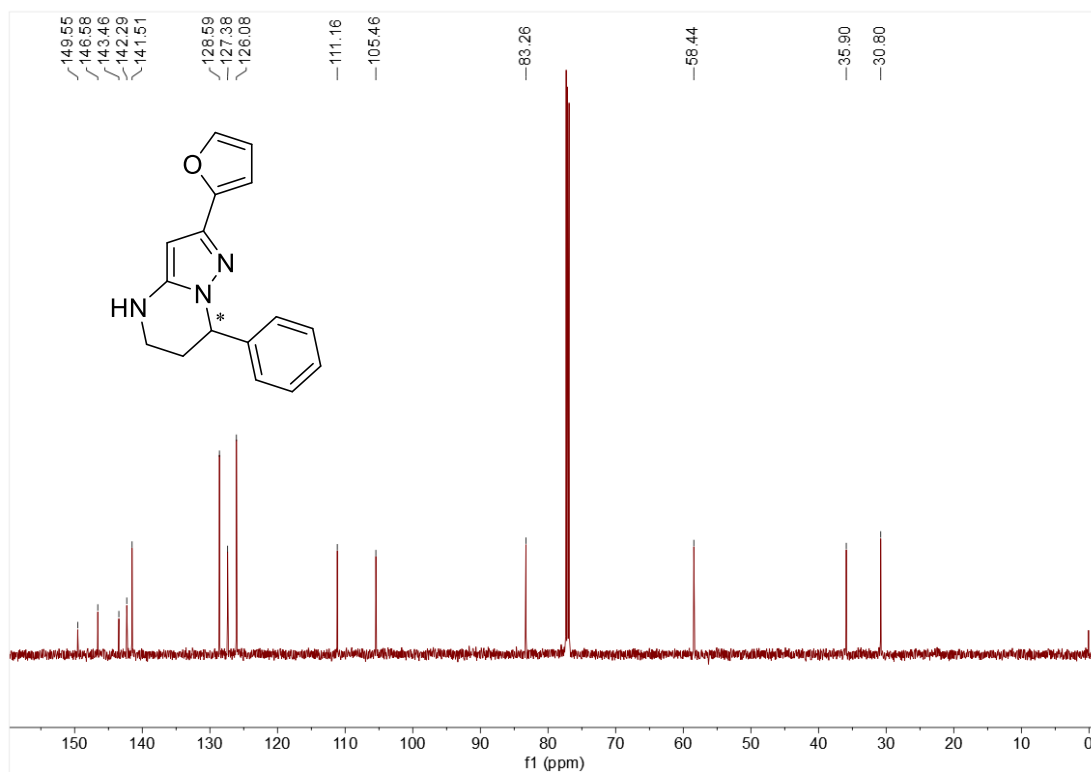

7-phenyl-4,5,6,7-tetrahydropyrazolo[1,5-a]pyrimidine (**4p**)

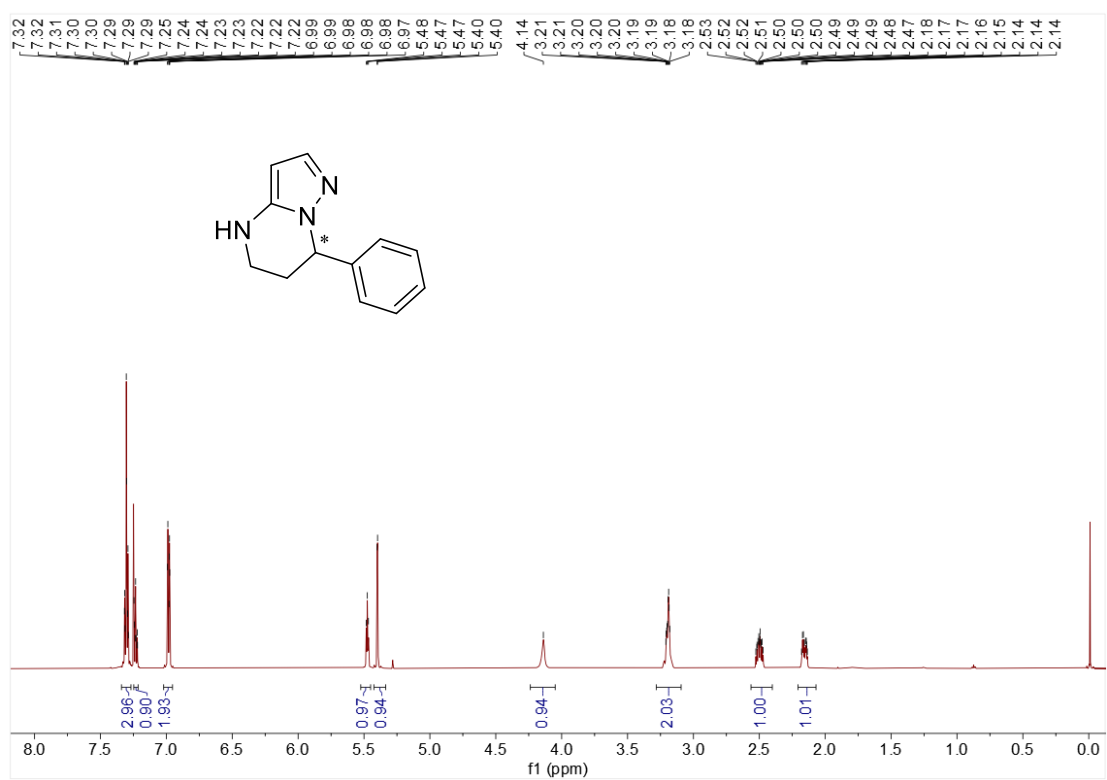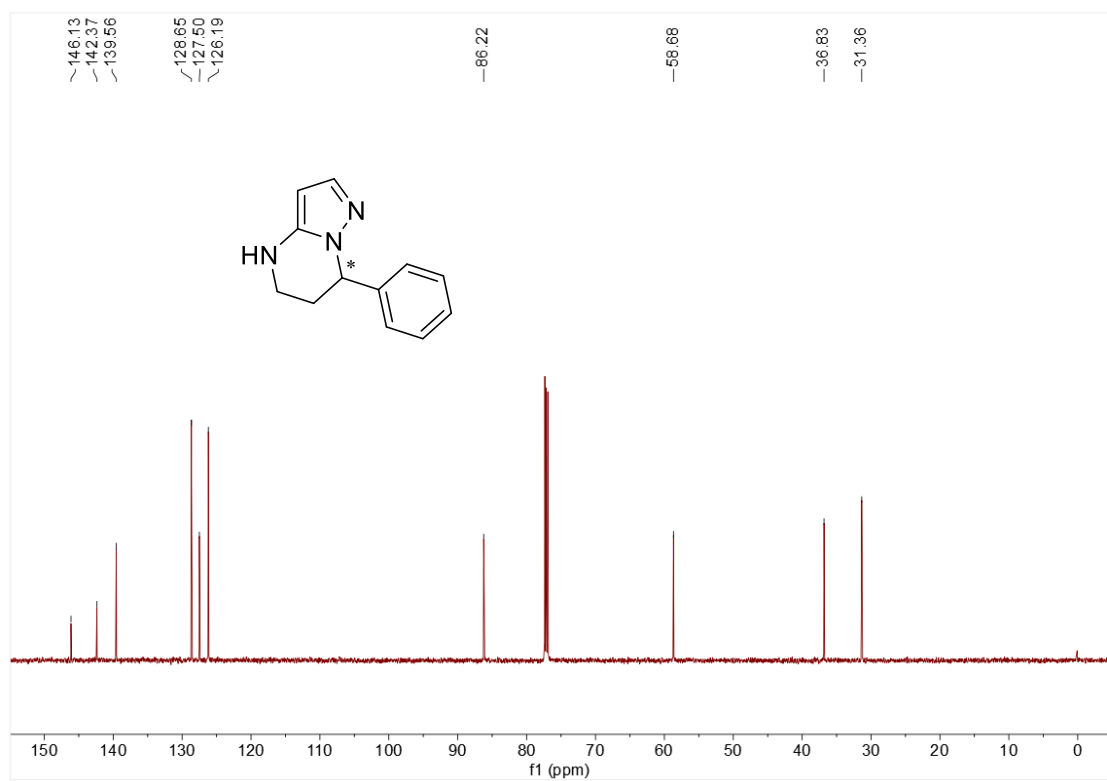

2-(*tert*-butyl)-7-phenyl-4,5,6,7-tetrahydropyrazolo[1,5-*a*]pyrimidine (**4q**)

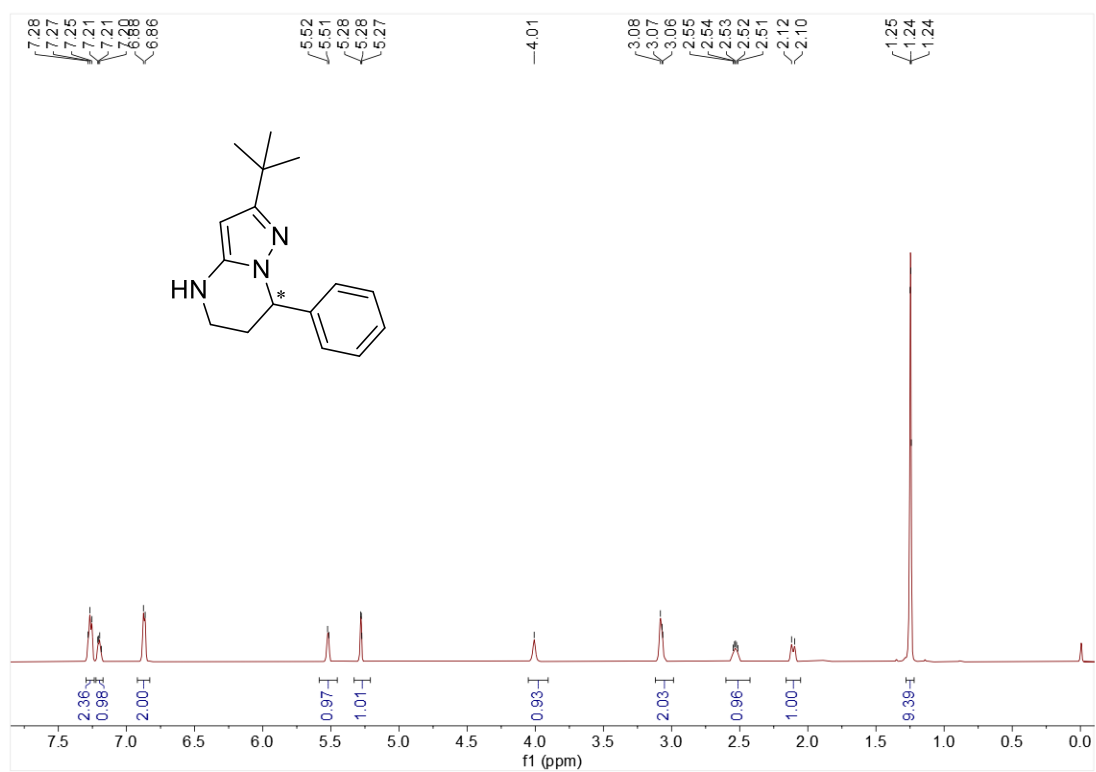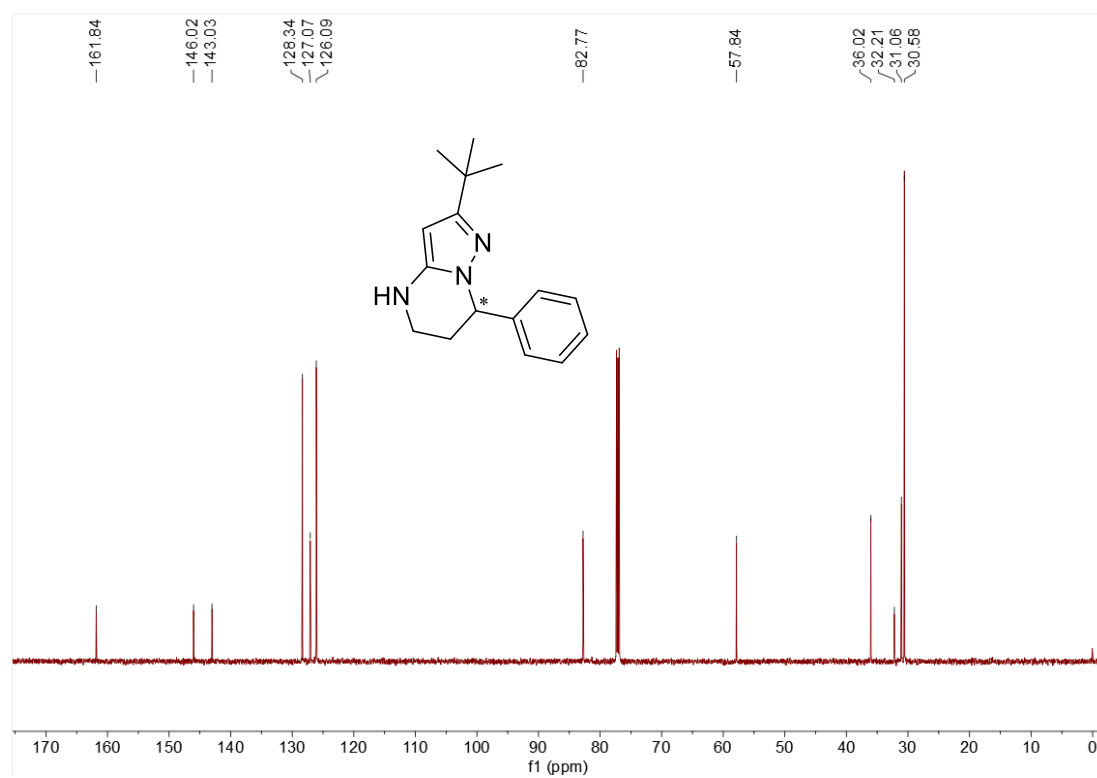

7-(*p*-tolyl)-4,5,6,7-tetrahydropyrazolo[1,5-*a*]pyrimidine-3-carbonitrile (**6e**)

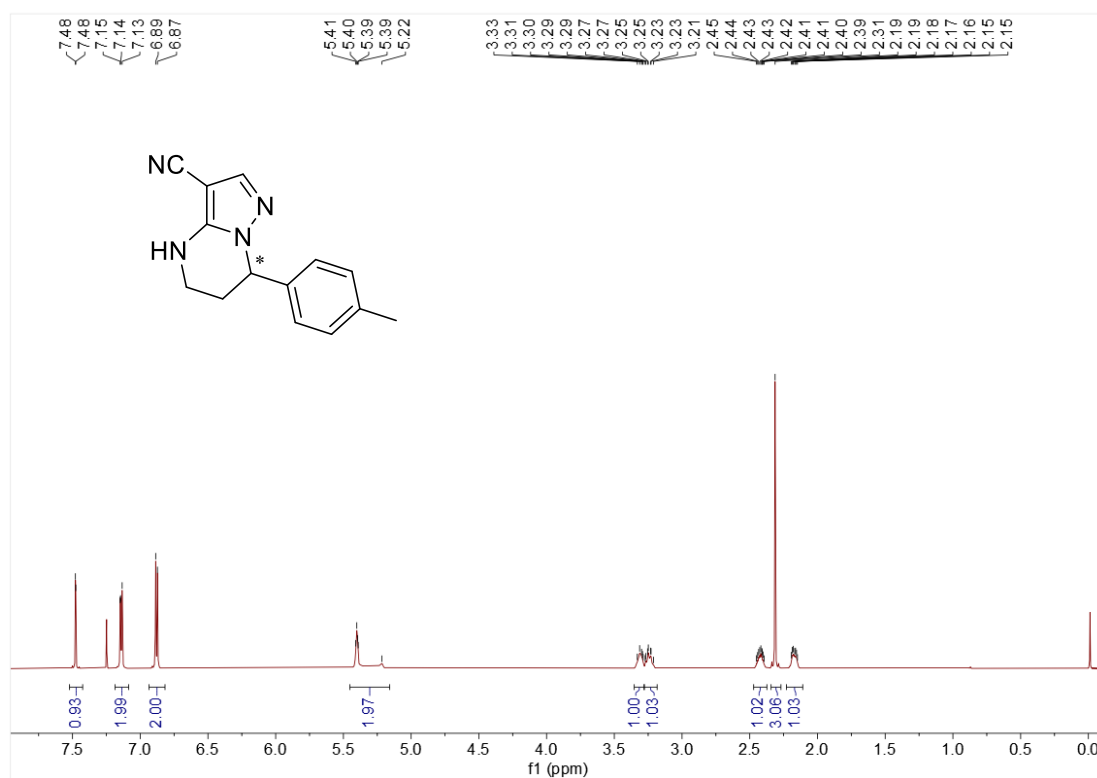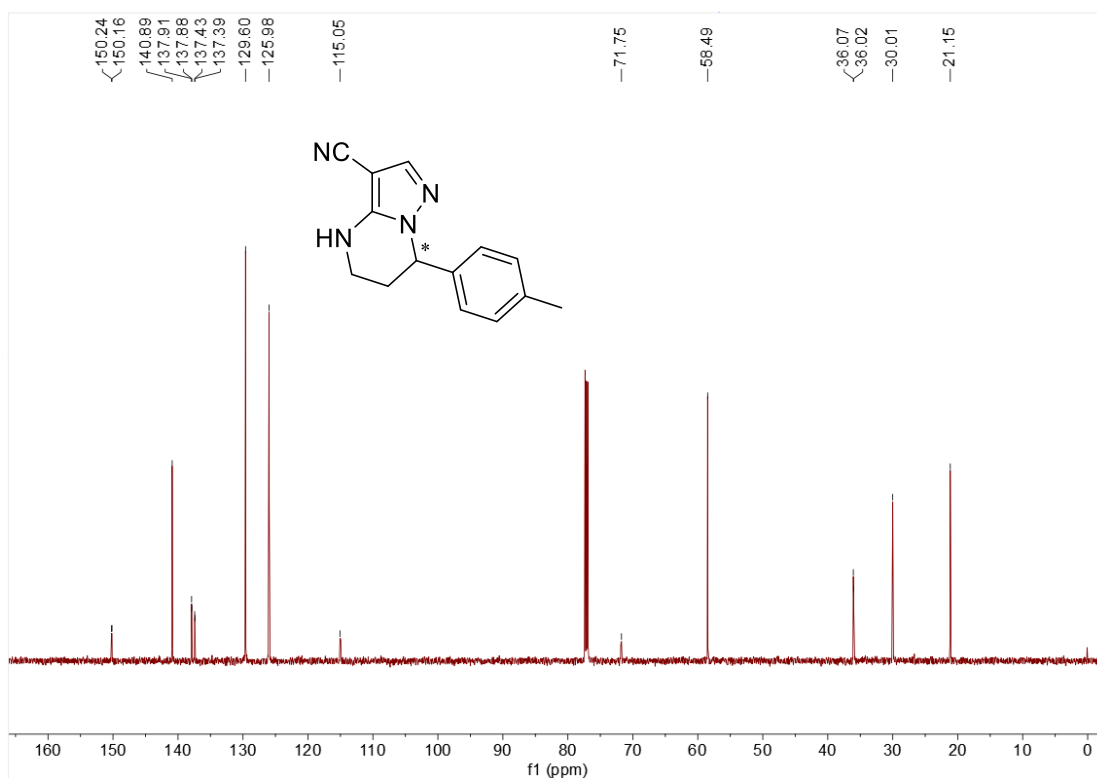



The  $^1\text{H}$  NMR of deuterium labeling experiments.

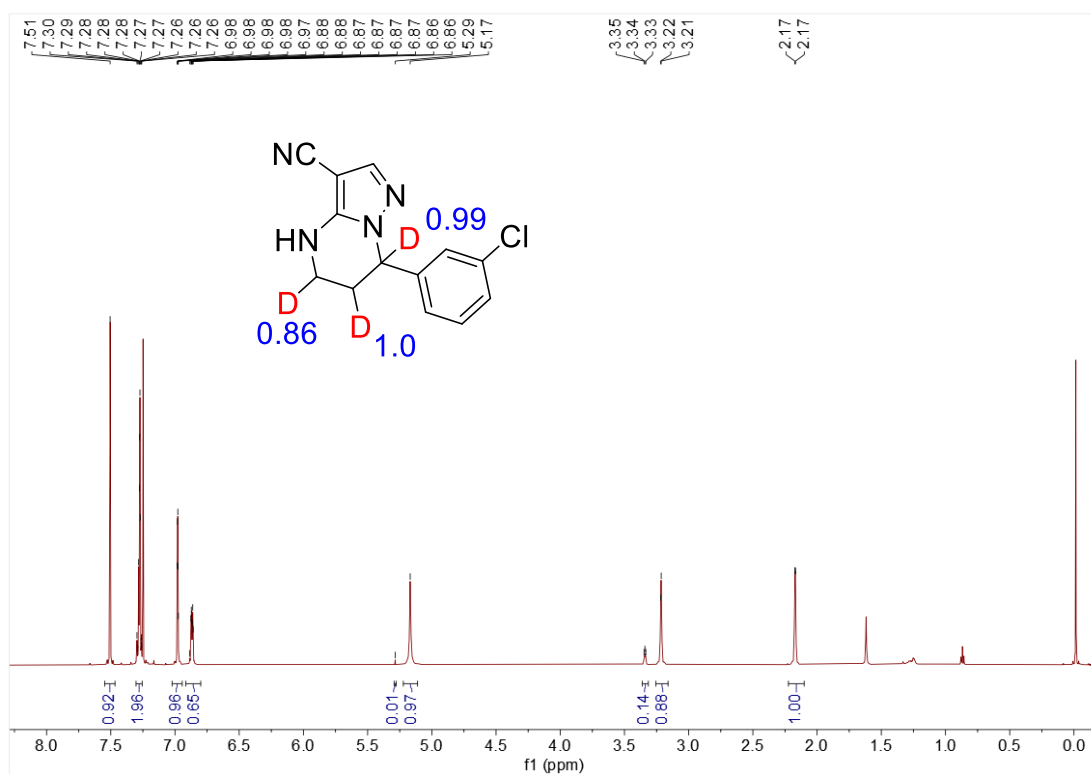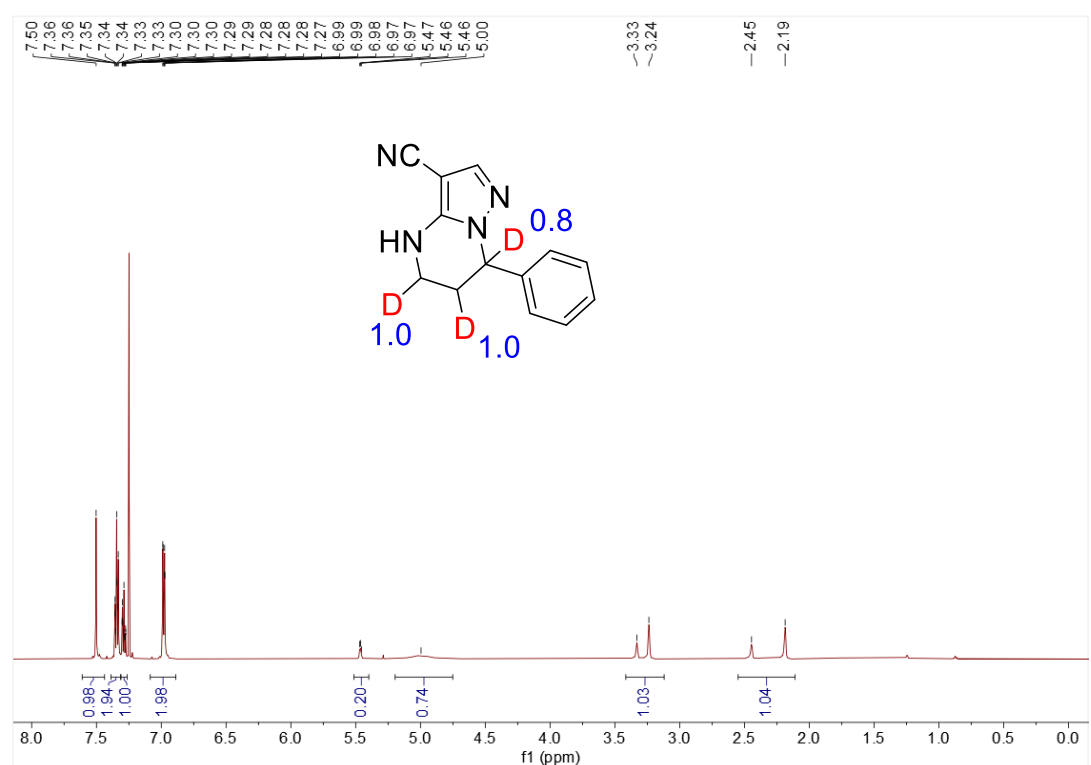

7-phenyl-4,5,6,7-tetrahydropyrazolo[1,5-a]pyrimidine-3-carbonitrile (**2a**)

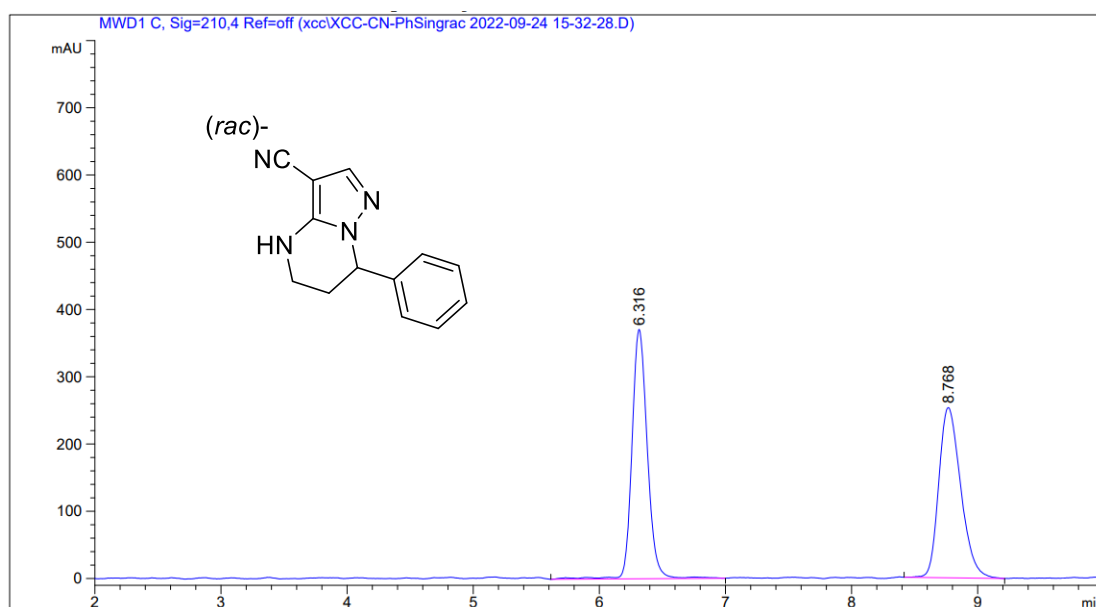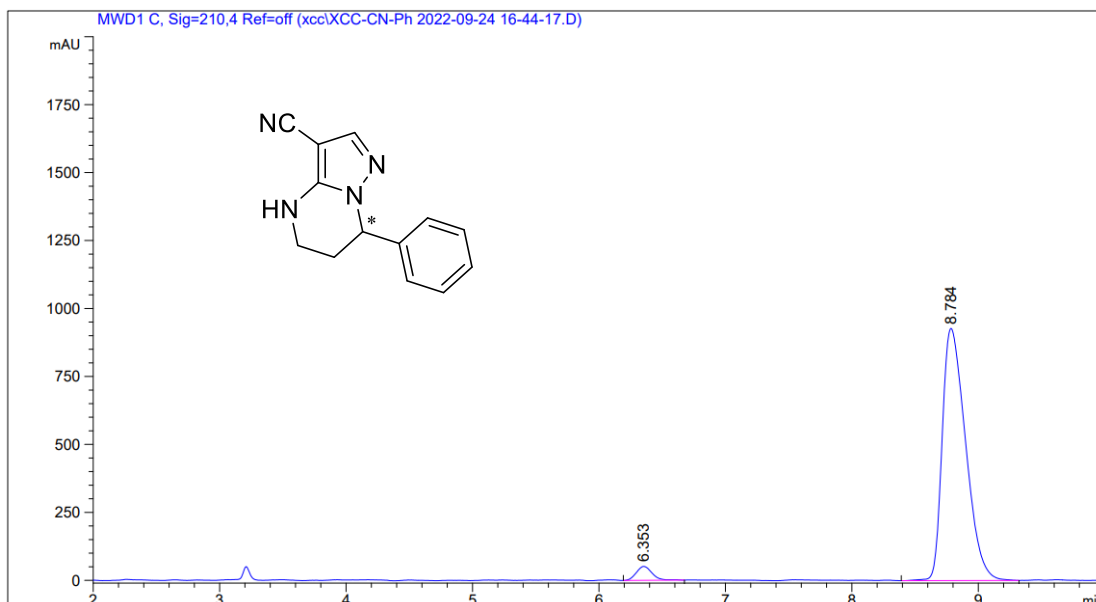

| Peak # | RetTime [min] | Type | Width [min] | Area [mAU*s] | Height [mAU] | Area %  |
|--------|---------------|------|-------------|--------------|--------------|---------|
| 1      | 6.353         | BB   | 0.1328      | 442.56970    | 51.22913     | 3.5822  |
| 2      | 8.784         | BB   | 0.2058      | 1.19121e4    | 927.51611    | 96.4178 |

Totals : 1.23546e4 978.74524

7-(*m*-tolyl)-4,5,6,7-tetrahydropyrazolo[1,5-*a*]pyrimidine-3-carbonitrile (**2b**)

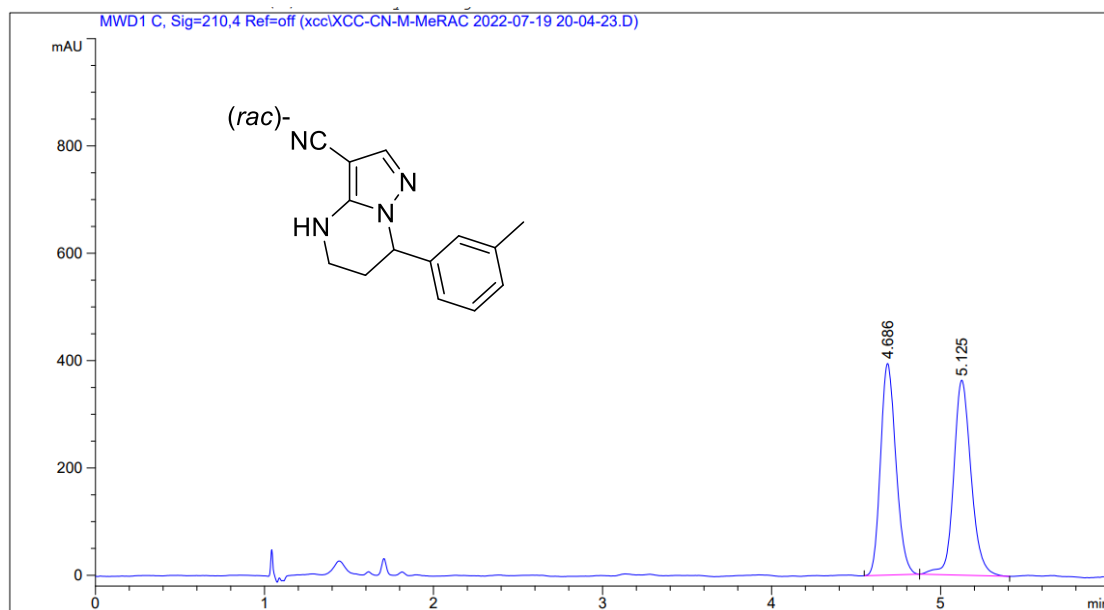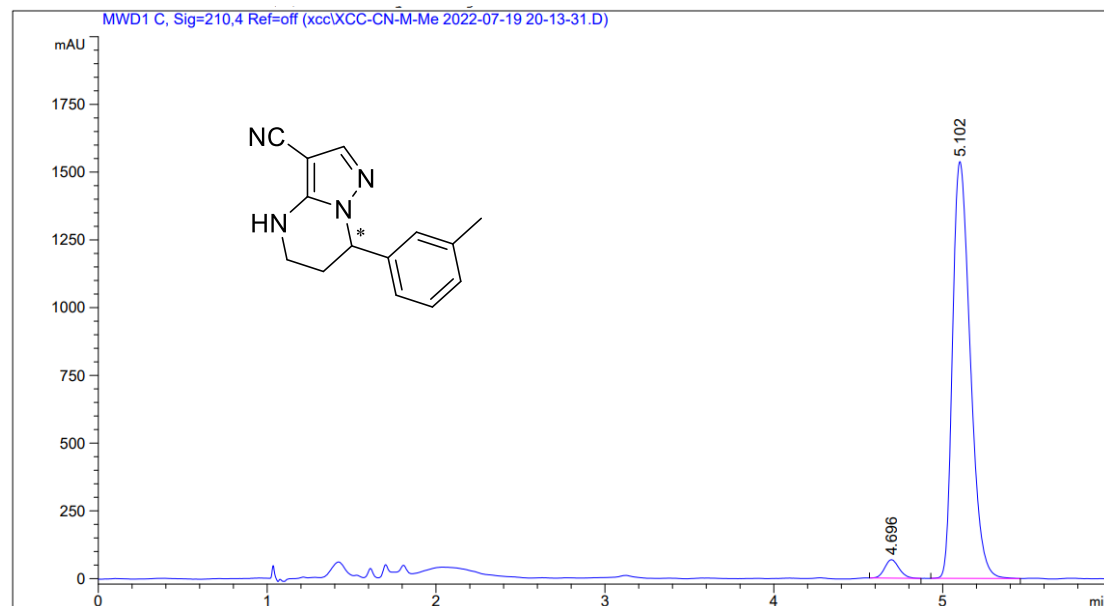

| Peak # | RetTime [min] | Type | Width [min] | Area [mAU*s] | Height [mAU] | Area %  |
|--------|---------------|------|-------------|--------------|--------------|---------|
| 1      | 4.696         | BB   | 0.0906      | 402.78244    | 68.01381     | 3.4822  |
| 2      | 5.102         | BB   | 0.1132      | 1.11642e4    | 1538.27539   | 96.5178 |

Totals : 1.15670e4 1606.28920

7-(3-methoxyphenyl)-4,5,6,7-tetrahydropyrazolo[1,5-a]pyrimidine-3-carbonitrile (**2c**)

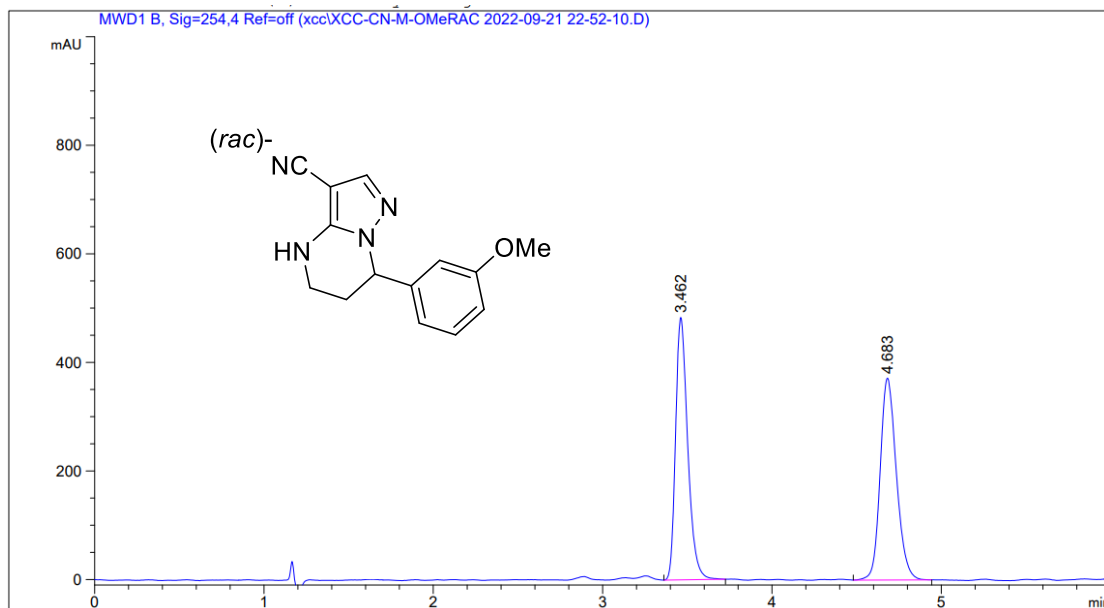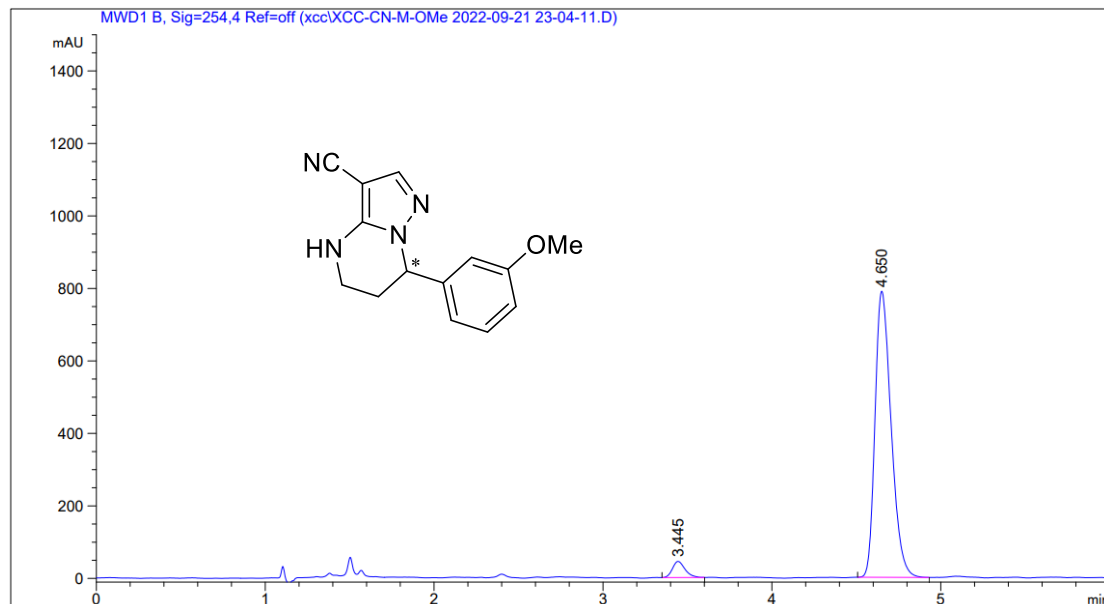

| Peak # | RetTime [min] | Type | Width [min] | Area [mAU*s] | Height [mAU] | Area %  |
|--------|---------------|------|-------------|--------------|--------------|---------|
| 1      | 3.445         | BB   | 0.0793      | 227.38565    | 44.35575     | 4.1746  |
| 2      | 4.650         | BB   | 0.1027      | 5219.56396   | 789.19562    | 95.8254 |

Totals : 5446.94962 833.55137

7-(4-(*tert*-butyl)phenyl)-4,5,6,7-tetrahydropyrazolo[1,5-a]pyrimidine-3-carbonitrile

(2d)

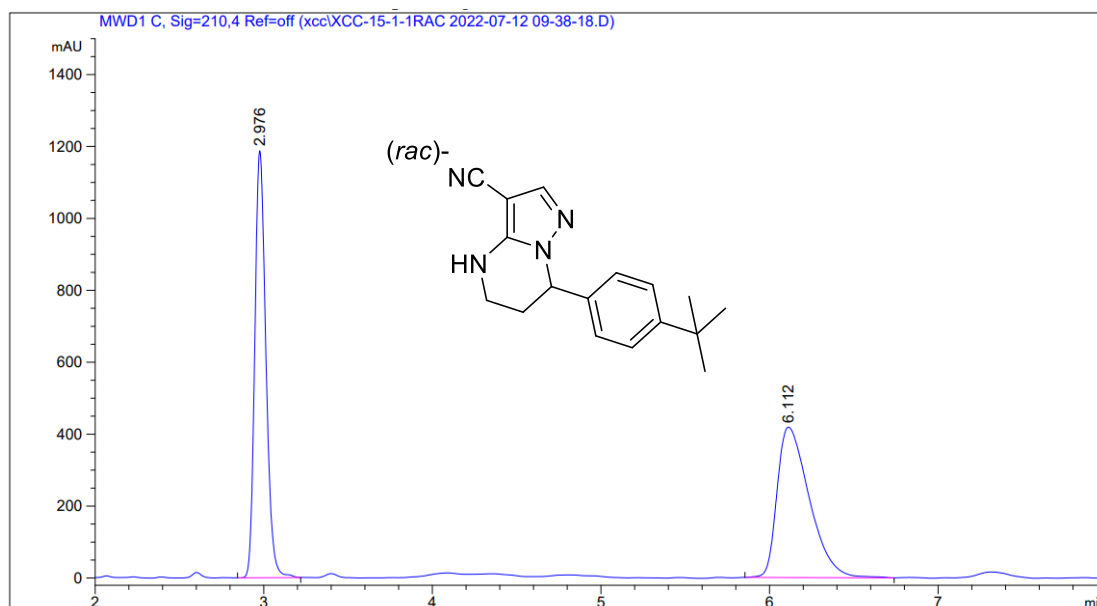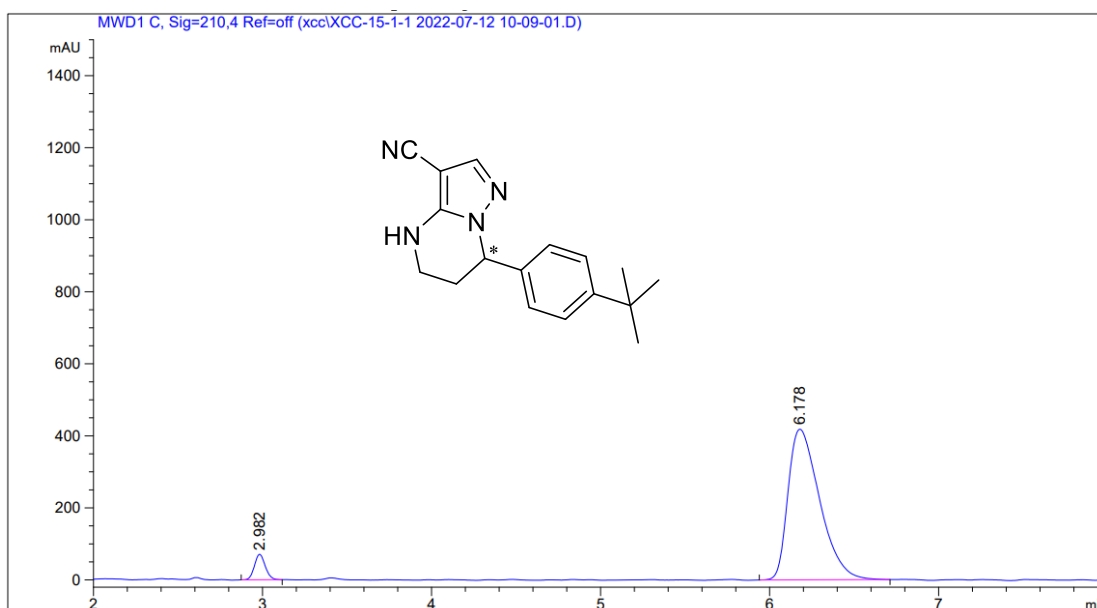

| Peak # | RetTime [min] | Type | Width [min] | Area [mAU*s] | Height [mAU] | Area %  |
|--------|---------------|------|-------------|--------------|--------------|---------|
| 1      | 2.982         | BB   | 0.0684      | 314.35291    | 70.66316     | 5.4629  |
| 2      | 6.178         | BB   | 0.1928      | 5440.00049   | 418.16071    | 94.5371 |

Totals : 5754.35339 488.82387

7-(3-chlorophenyl)-4,5,6,7-tetrahydropyrazolo[1,5-a]pyrimidine-3-carbonitrile (**2e**)

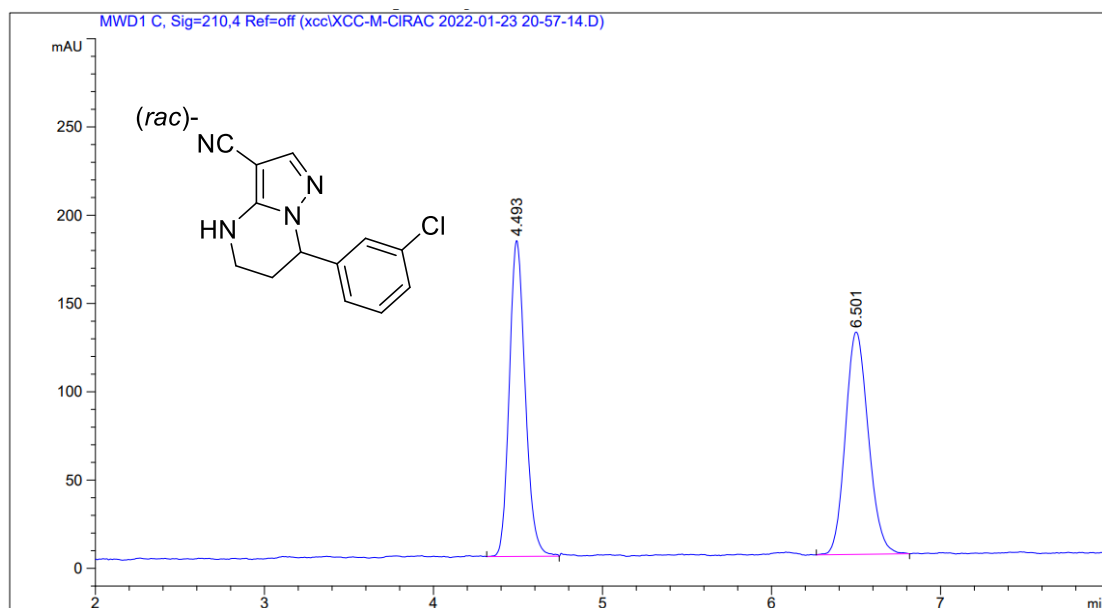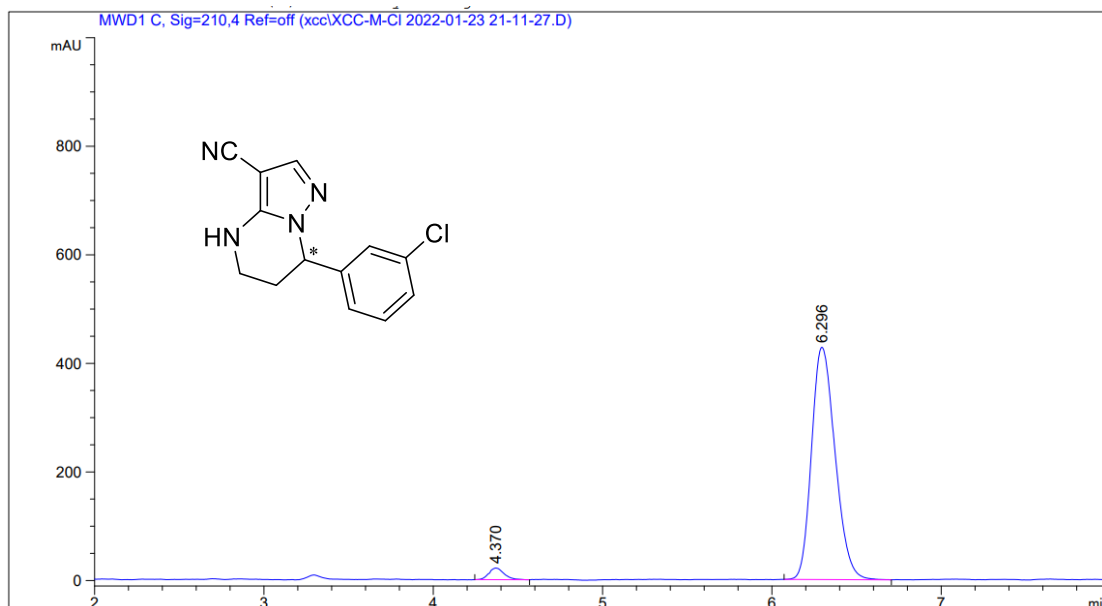

| Peak # | RetTime [min] | Type | Width [min] | Area [mAU*s] | Height [mAU] | Area %  |
|--------|---------------|------|-------------|--------------|--------------|---------|
| 1      | 4.370         | BB   | 0.0927      | 134.71066    | 21.47473     | 3.1522  |
| 2      | 6.296         | BB   | 0.1478      | 4138.79443   | 428.12140    | 96.8478 |

Totals : 4273.50510 449.59613

7-(3-fluorophenyl)-4,5,6,7-tetrahydropyrazolo[1,5-a]pyrimidine-3-carbonitrile (**2f**)

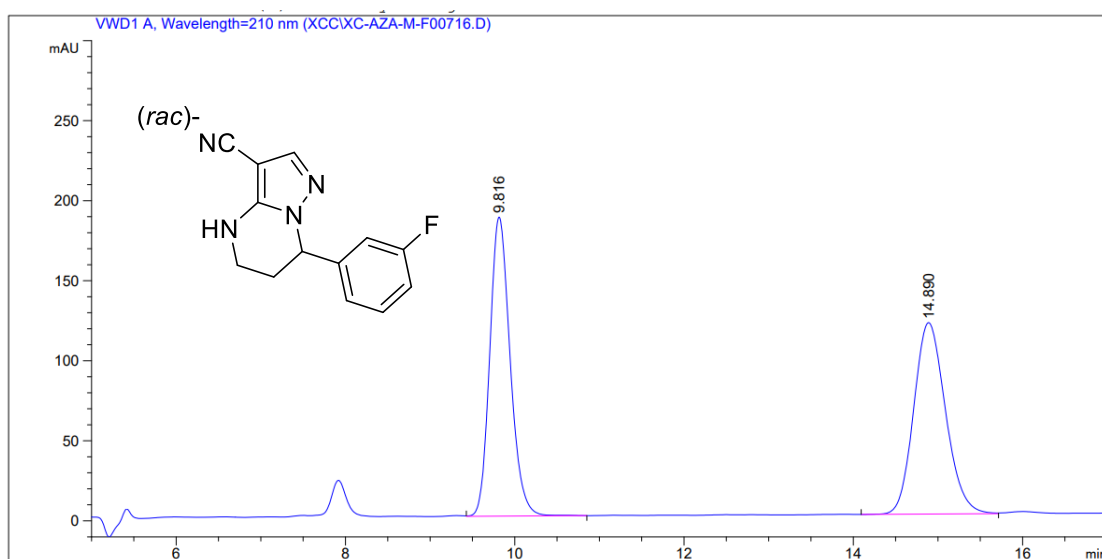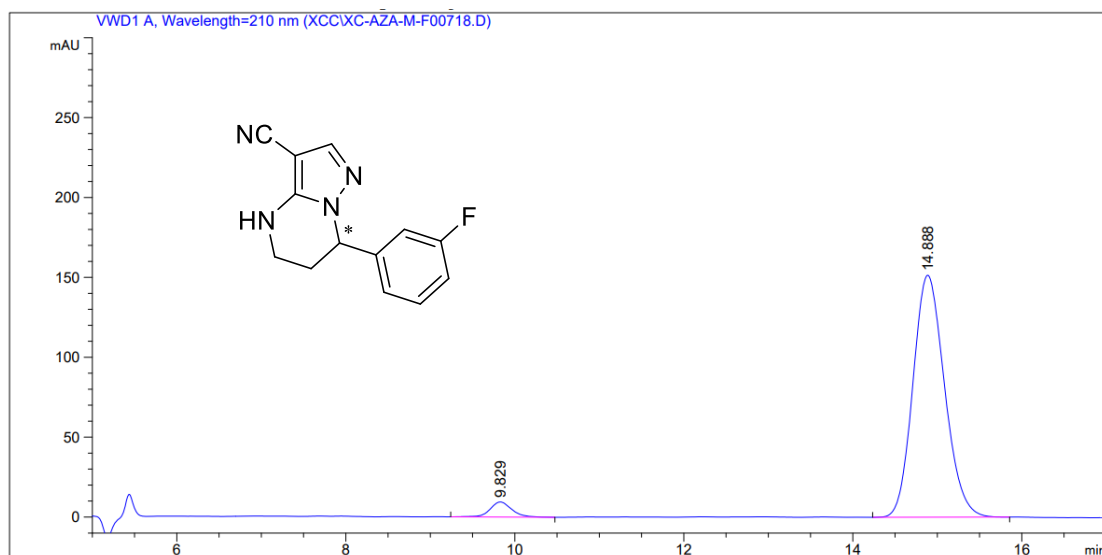

| Peak # | RetTime [min] | Type | Width [min] | Area [mAU*s] | Height [mAU] | Area %  |
|--------|---------------|------|-------------|--------------|--------------|---------|
| 1      | 9.829         | BB   | 0.2708      | 168.09373    | 9.43937      | 4.1057  |
| 2      | 14.888        | BB   | 0.4024      | 3926.06006   | 151.44839    | 95.8943 |

Totals : 4094.15379 160.88776

7-(3-bromophenyl)-4,5,6,7-tetrahydropyrazolo[1,5-a]pyrimidine-3-carbonitrile (**2g**)

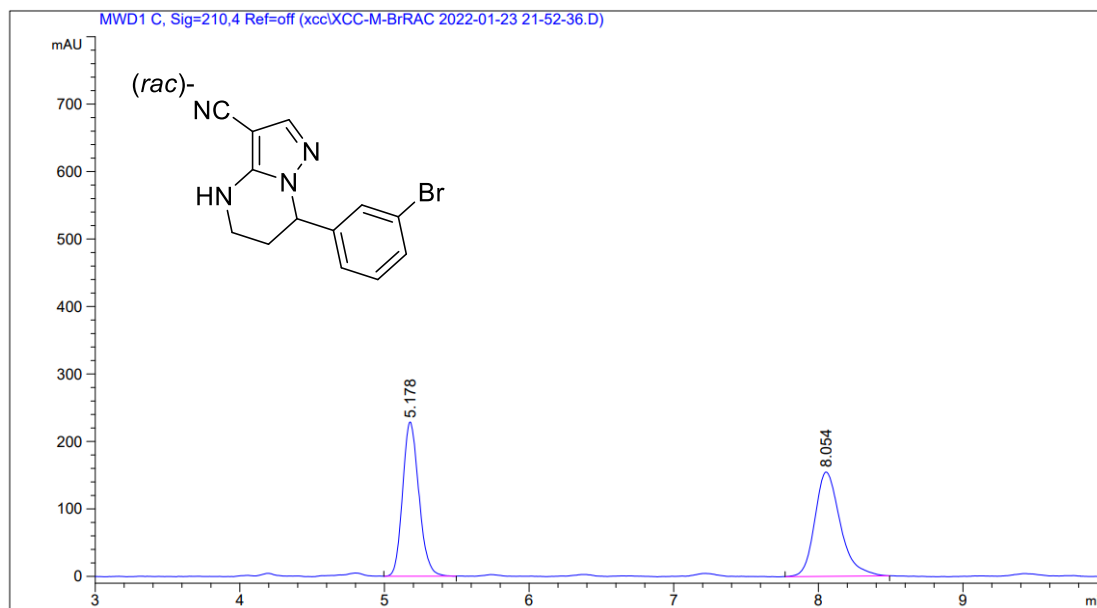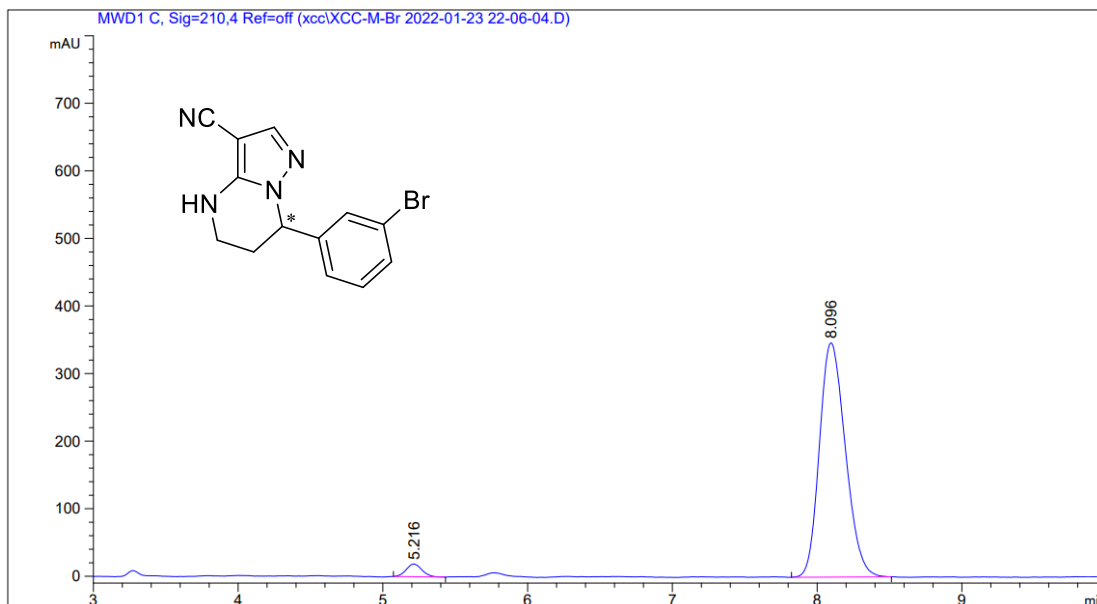

| Peak # | RetTime [min] | Type | Width [min] | Area [mAU*s] | Height [mAU] | Area %  |
|--------|---------------|------|-------------|--------------|--------------|---------|
| 1      | 5.216         | BB   | 0.0929      | 140.72729    | 18.66773     | 3.1534  |
| 2      | 8.096         | BB   | 0.1945      | 4321.95557   | 346.53735    | 96.8466 |

Totals : 4462.68286 365.20508



7-(4-fluorophenyl)-4,5,6,7-tetrahydropyrazolo[1,5-a]pyrimidine-3-carbonitrile (**2h**)

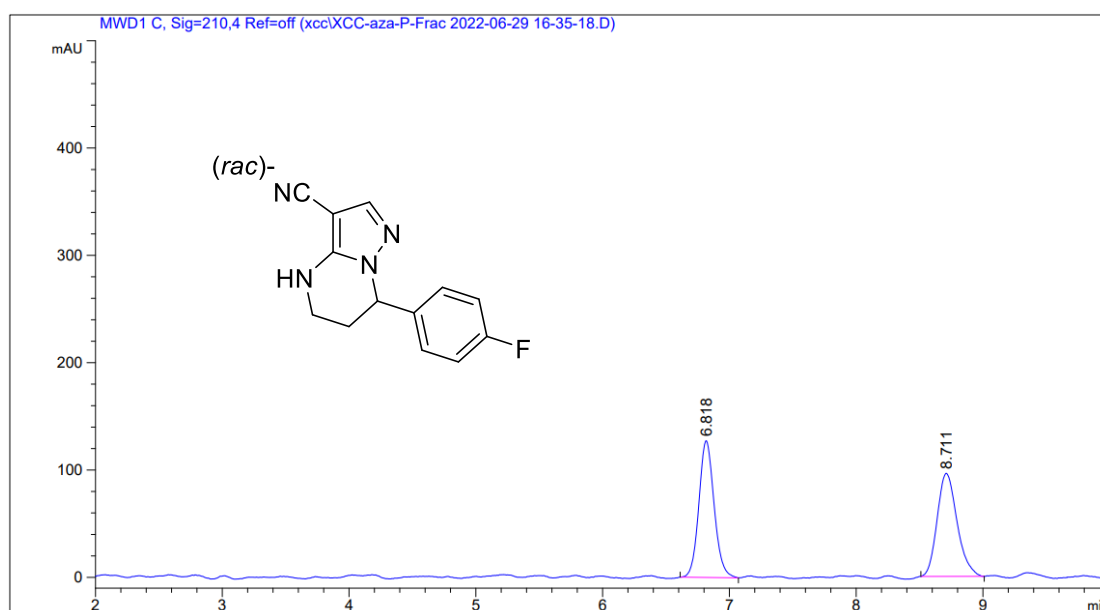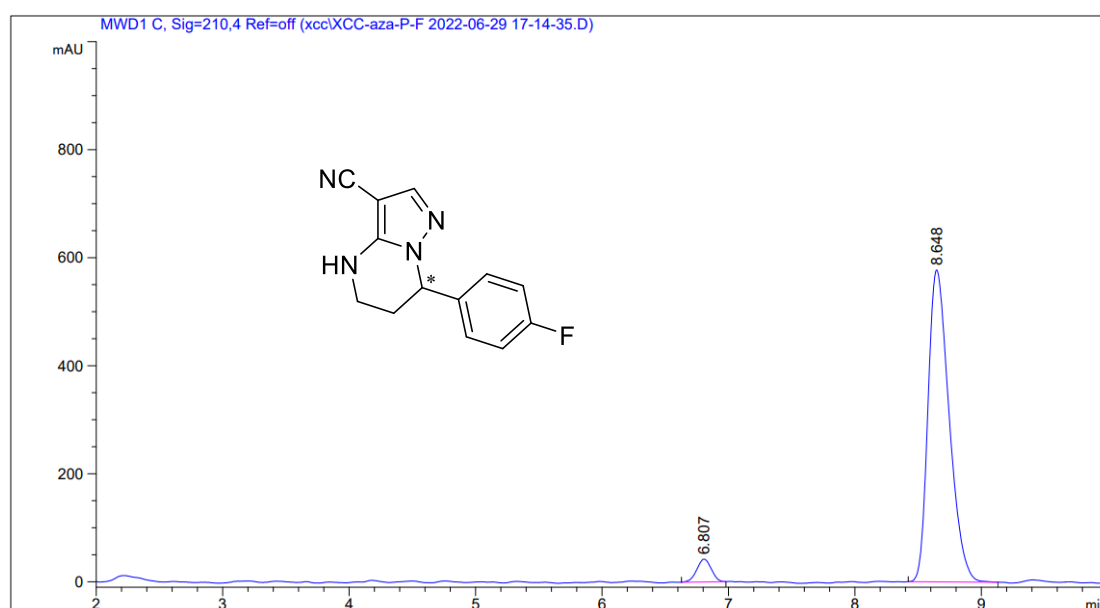

| Peak # | RetTime [min] | Type | Width [min] | Area [mAU*s] | Height [mAU] | Area %  |
|--------|---------------|------|-------------|--------------|--------------|---------|
| 1      | 6.807         | BB   | 0.1056      | 334.99820    | 42.22084     | 4.7697  |
| 2      | 8.648         | BB   | 0.1761      | 6688.40771   | 577.55975    | 95.2303 |

Totals : 7023.40591 619.78059

7-(4-chlorophenyl)-4,5,6,7-tetrahydropyrazolo[1,5-a]pyrimidine-3-carbonitrile (**2i**)

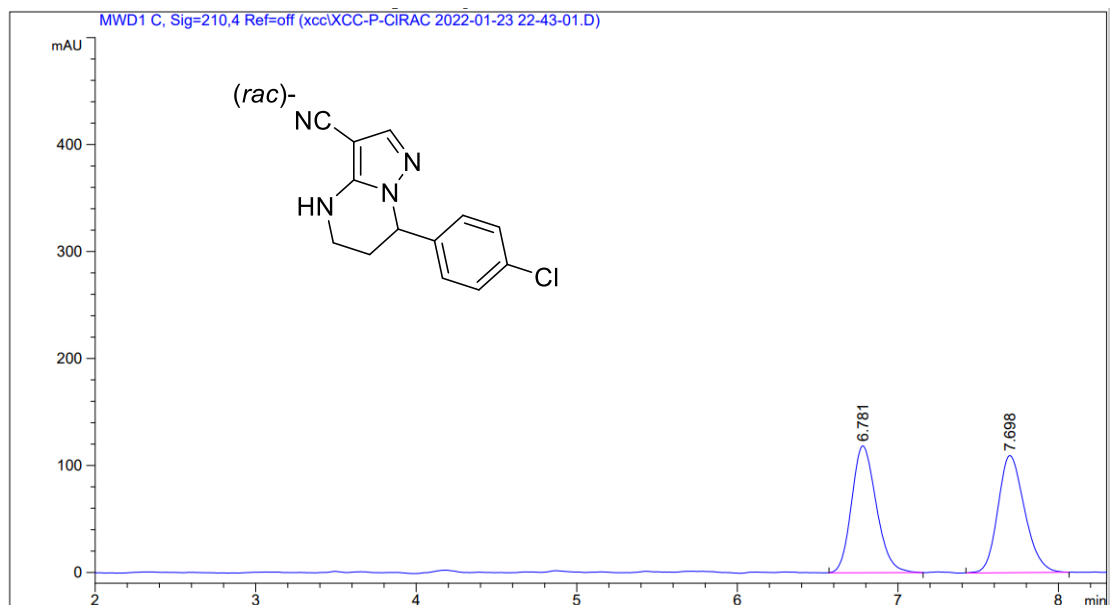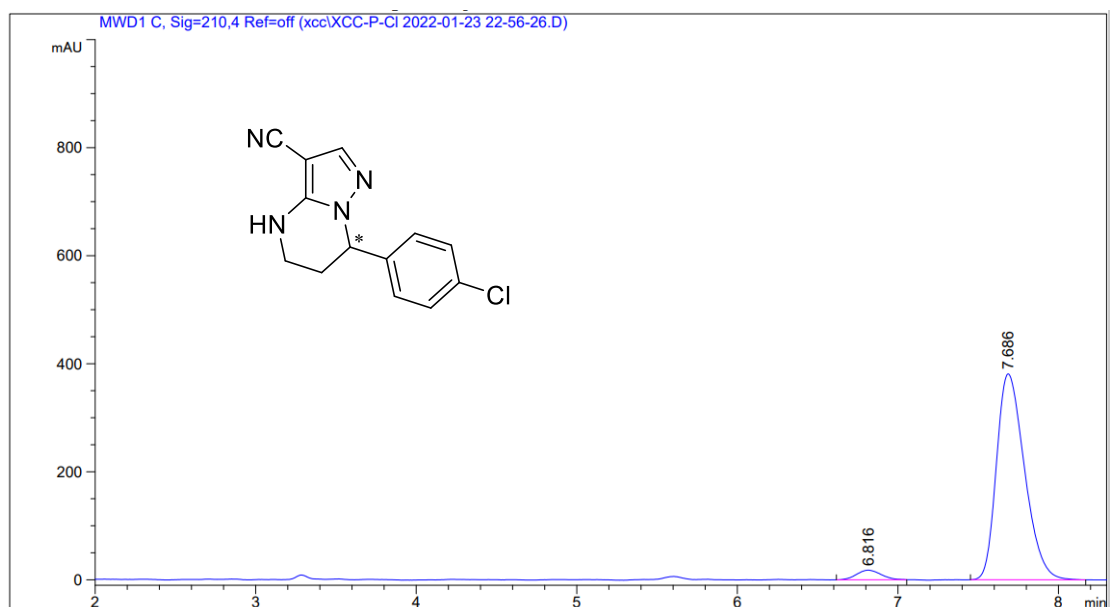

| Peak #   | RetTime [min] | Type | Width [min] | Area [mAU*s] | Height [mAU] | Area %  |
|----------|---------------|------|-------------|--------------|--------------|---------|
| 1        | 6.816         | BB   | 0.1262      | 187.15504    | 17.79132     | 3.8932  |
| 2        | 7.686         | BB   | 0.1864      | 4620.02002   | 381.19168    | 96.1068 |
| Totals : |               |      |             | 4807.17506   | 398.98300    |         |

7-(4-bromophenyl)-4,5,6,7-tetrahydropyrazolo[1,5-a]pyrimidine-3-carbonitrile (**2j**)

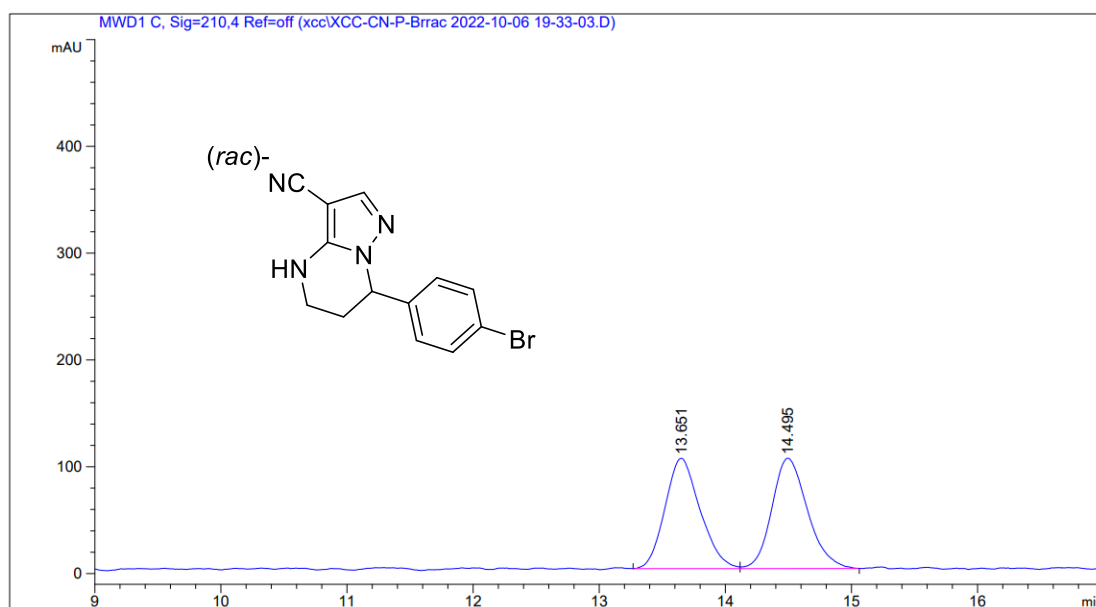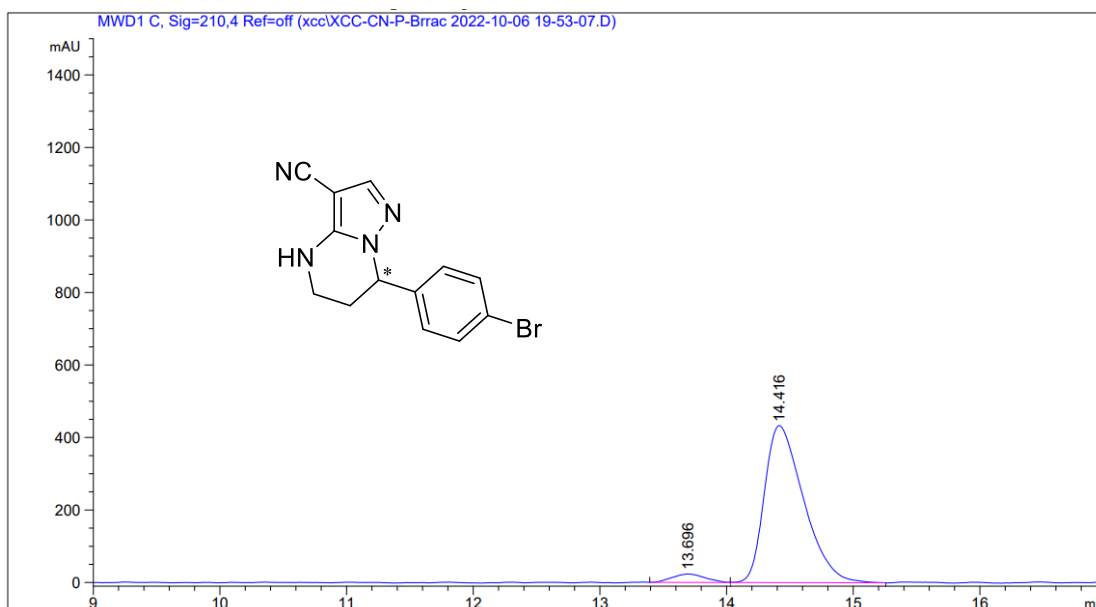

| Peak # | RetTime [min] | Type | Width [min] | Area [mAU*s] | Height [mAU] | Area %  |
|--------|---------------|------|-------------|--------------|--------------|---------|
| 1      | 13.696        | VB R | 0.2118      | 409.96548    | 23.07668     | 4.2216  |
| 2      | 14.416        | VV R | 0.2876      | 9301.07910   | 433.00989    | 95.7784 |

Totals : 9711.04459 456.08657

7-(2-methoxyphenyl)-4,5,6,7-tetrahydropyrazolo[1,5-a]pyrimidine-3-carbonitrile (**2k**)

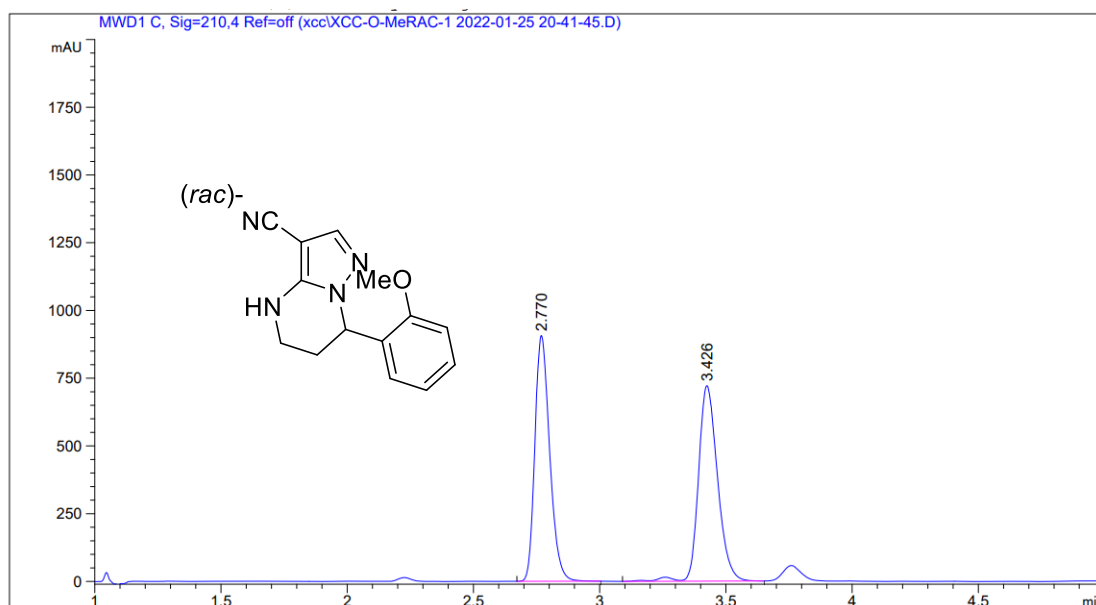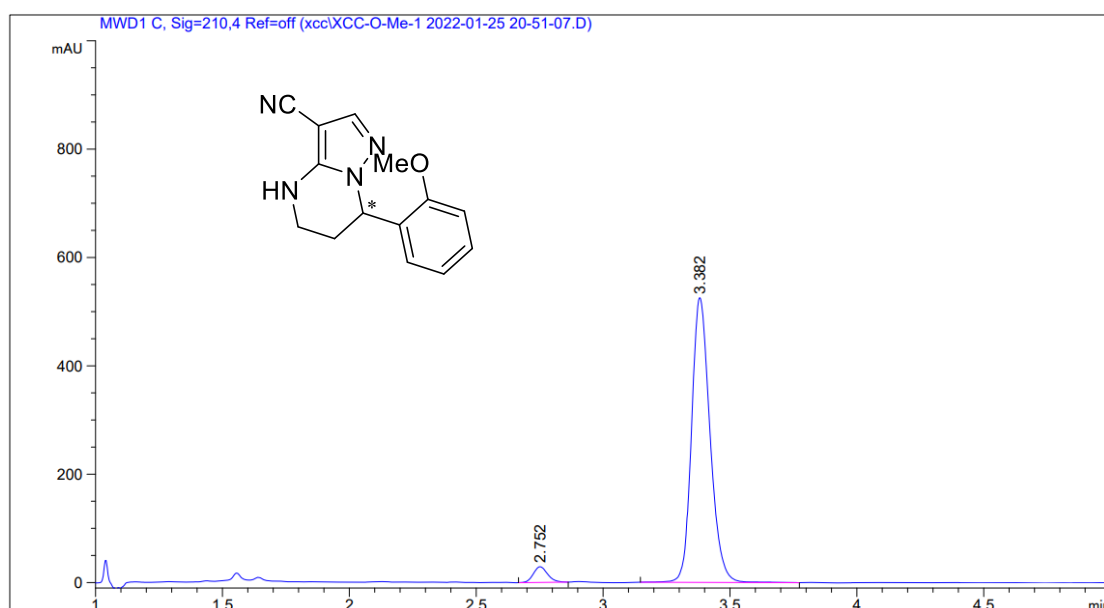

| Peak #   | RetTime [min] | Type | Width [min] | Area [mAU*s] | Height [mAU] | Area %  |
|----------|---------------|------|-------------|--------------|--------------|---------|
| 1        | 2.752         | BB   | 0.0616      | 112.95475    | 28.91854     | 4.0706  |
| 2        | 3.382         | BB   | 0.0772      | 2661.90649   | 524.46478    | 95.9294 |
| Totals : |               |      |             | 2774.86124   | 553.38332    |         |

7-(2-fluorophenyl)-4,5,6,7-tetrahydropyrazolo[1,5-a]pyrimidine-3-carbonitrile (**21**)

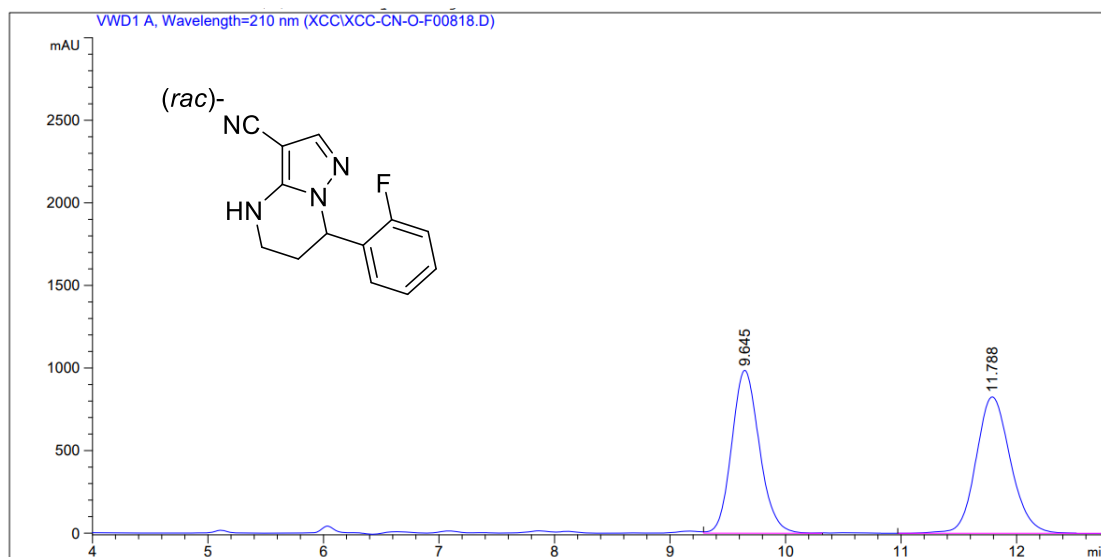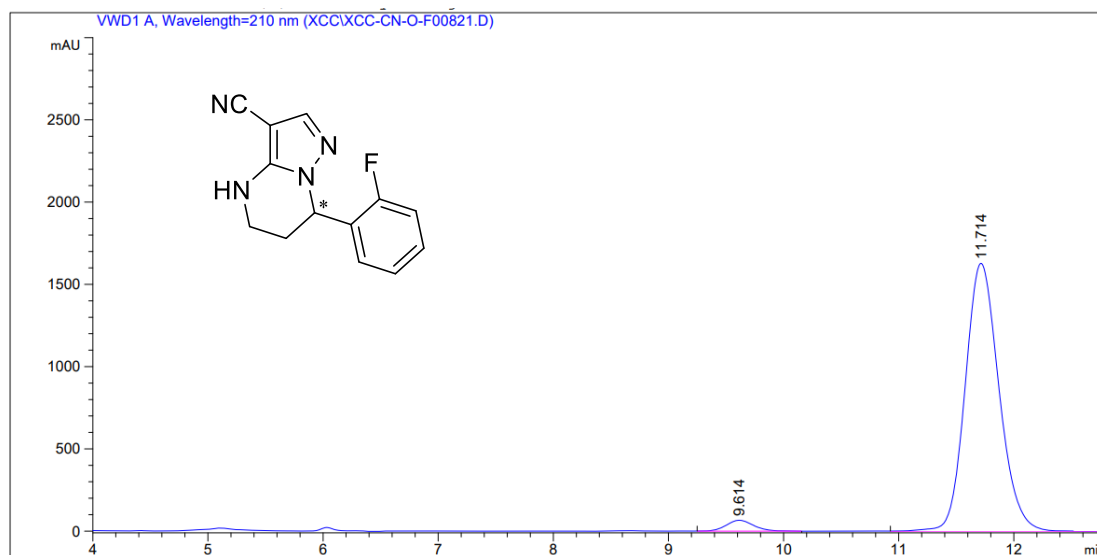

| Peak # | RetTime [min] | Type | Width [min] | Area [mAU*s] | Height [mAU] | Area %  |
|--------|---------------|------|-------------|--------------|--------------|---------|
| 1      | 9.614         | VB   | 0.2521      | 1083.78918   | 66.17799     | 3.1684  |
| 2      | 11.714        | VB   | 0.3143      | 3.31221e4    | 1628.28284   | 96.8316 |

Totals : 3.42059e4 1694.46082

7-(2-chlorophenyl)-4,5,6,7-tetrahydropyrazolo[1,5-a]pyrimidine-3-carbonitrile (**2m**)

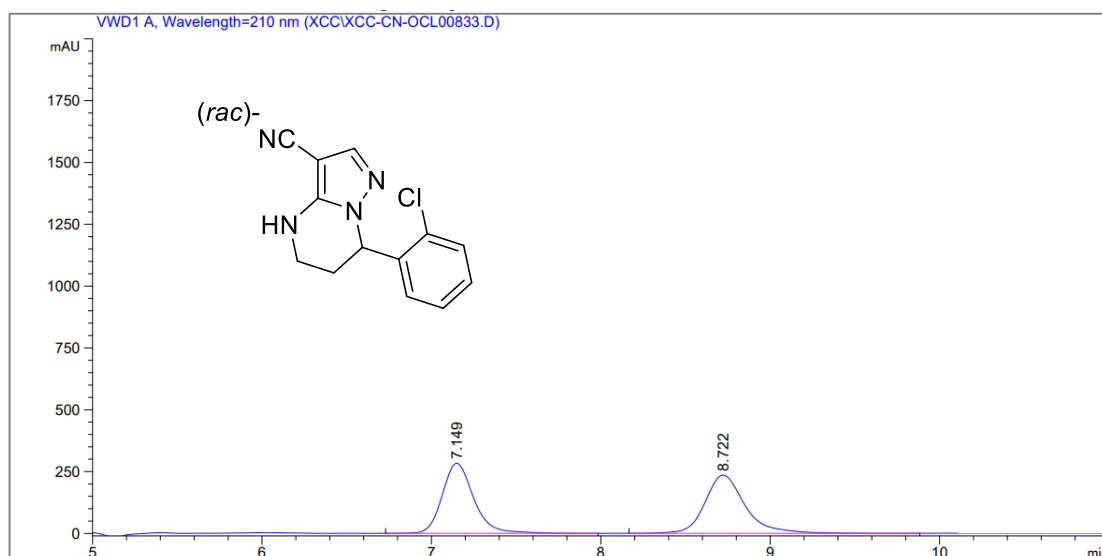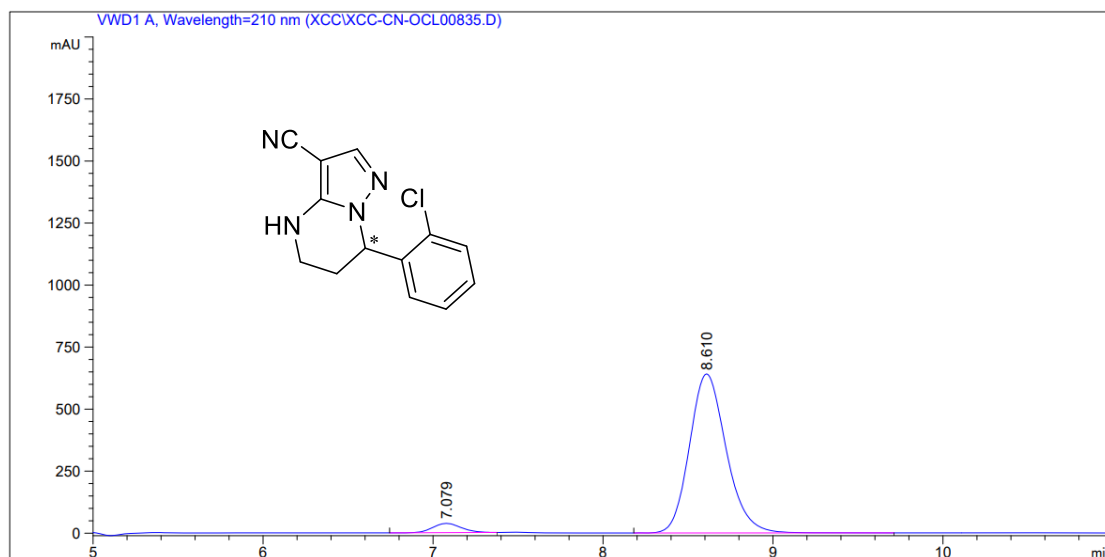

| Peak # | RetTime [min] | Type | Width [min] | Area [mAU*s] | Height [mAU] | Area %  |
|--------|---------------|------|-------------|--------------|--------------|---------|
| 1      | 7.079         | BB   | 0.1808      | 435.70203    | 37.41910     | 4.3333  |
| 2      | 8.610         | BB   | 0.2311      | 9618.93164   | 640.76038    | 95.6667 |

Totals : 1.00546e4 678.17947

7-(2-bromophenyl)-4,5,6,7-tetrahydropyrazolo[1,5-a]pyrimidine-3-carbonitrile (**2n**)

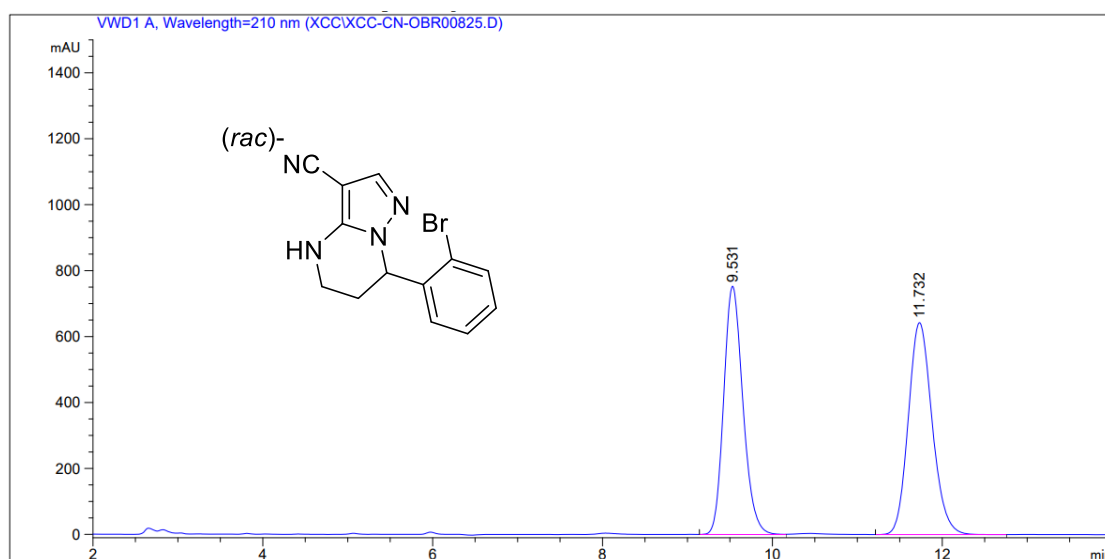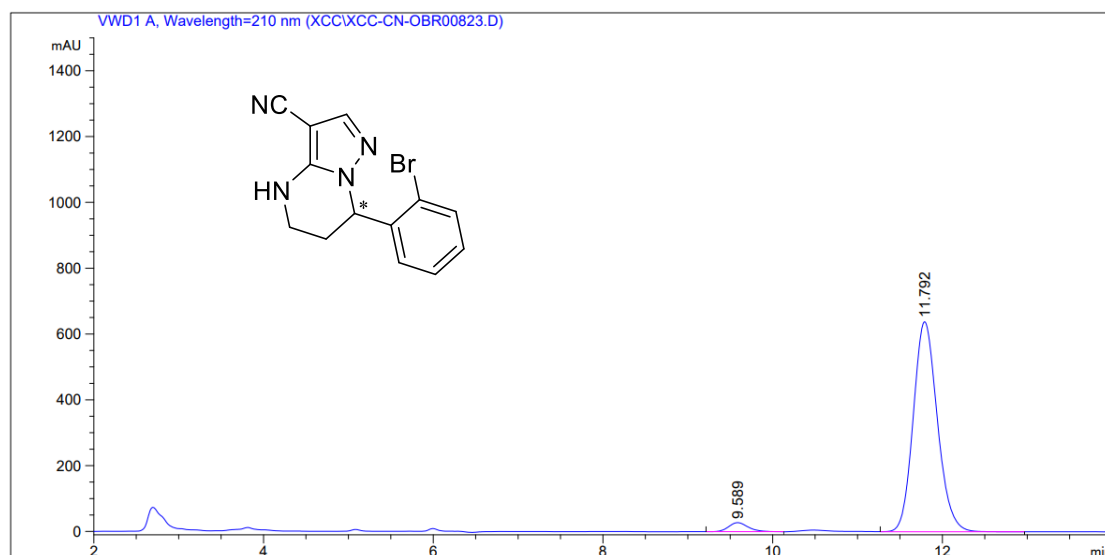

| Peak # | RetTime [min] | Type | Width [min] | Area [mAU*s] | Height [mAU] | Area %  |
|--------|---------------|------|-------------|--------------|--------------|---------|
| 1      | 9.589         | BB   | 0.2436      | 437.16492    | 27.47937     | 3.3571  |
| 2      | 11.792        | VB   | 0.3052      | 1.25851e4    | 637.95734    | 96.6429 |

Totals : 1.30223e4 665.43671

2,7-diphenyl-4,5,6,7-tetrahydropyrazolo[1,5-*a*]pyrimidine-3-carbonitrile (**2o**)

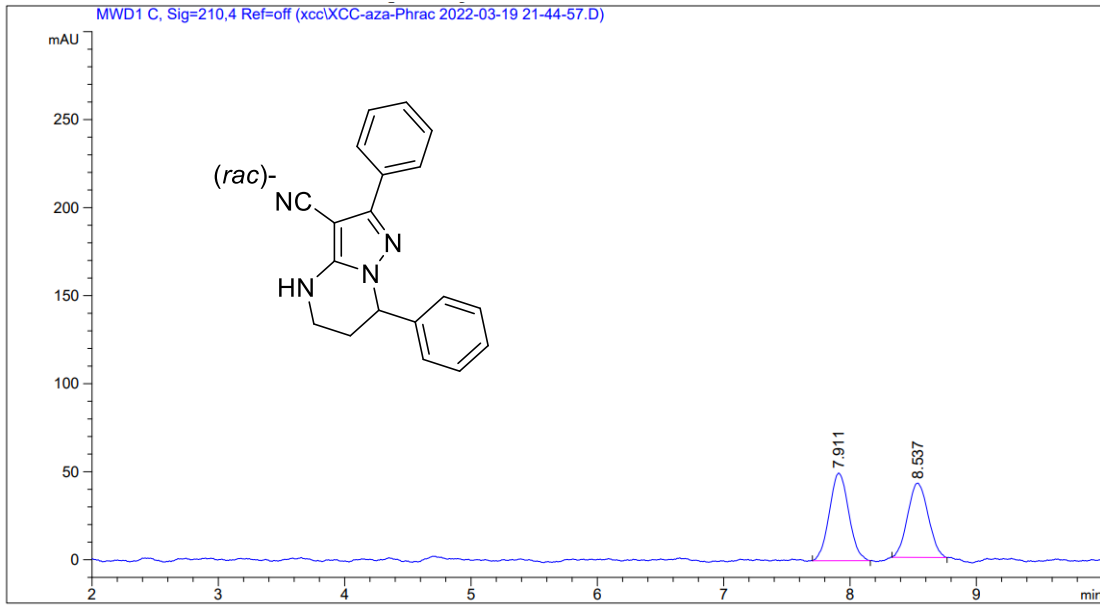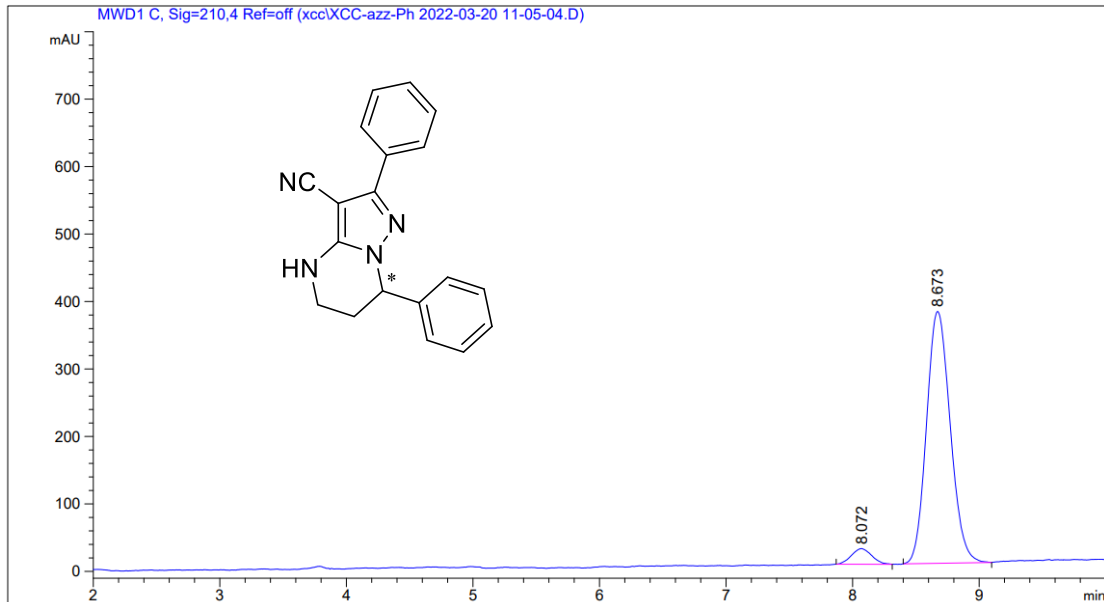

| Peak # | RetTime [min] | Type | Width [min] | Area [mAU*s] | Height [mAU] | Area %  |
|--------|---------------|------|-------------|--------------|--------------|---------|
| 1      | 8.072         | BB   | 0.1367      | 256.75662    | 23.17806     | 5.0190  |
| 2      | 8.673         | BB   | 0.1893      | 4858.91211   | 373.38199    | 94.9810 |

Totals : 5115.66873 396.56005



ethyl-7-phenyl-4,5,6,7-tetrahydropyrazolo[1,5-a]pyrimidine-3-carboxylate (**2p**)

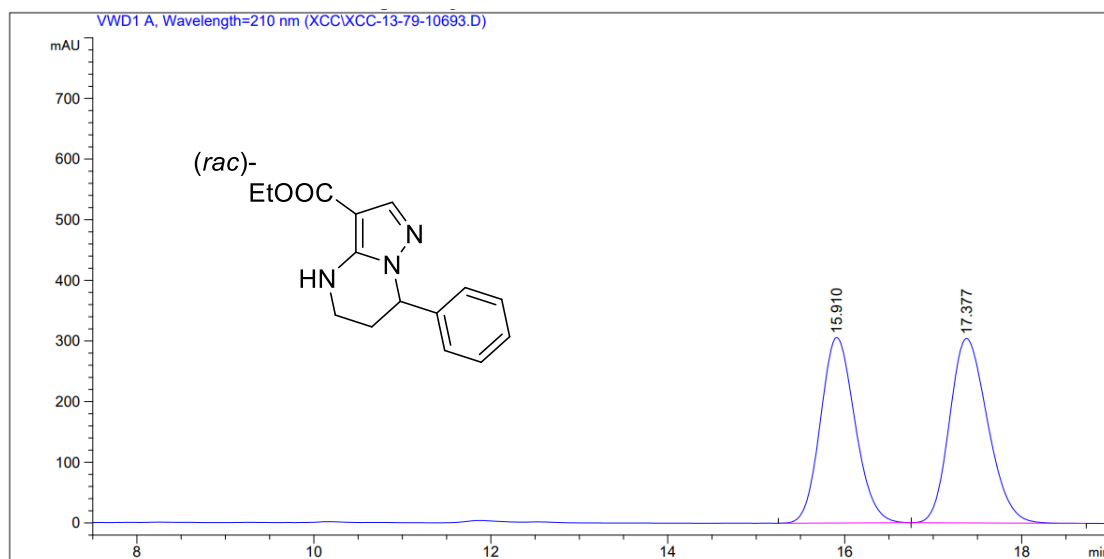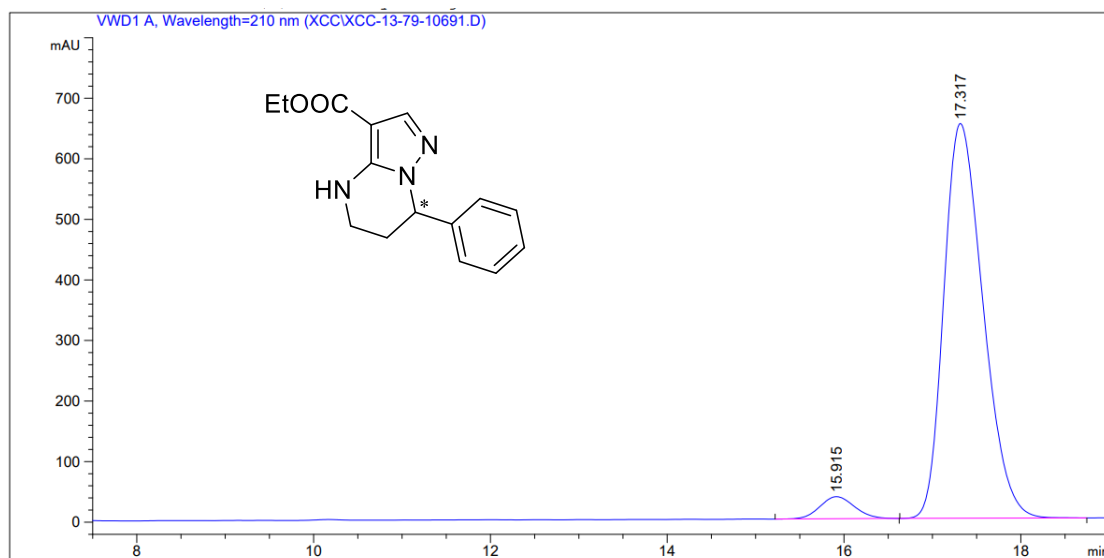

| Peak # | RetTime [min] | Type | Width [min] | Area [mAU*s] | Height [mAU] | Area %  |
|--------|---------------|------|-------------|--------------|--------------|---------|
| 1      | 15.915        | BB   | 0.4224      | 988.37842    | 36.43888     | 4.6980  |
| 2      | 17.317        | BB   | 0.4789      | 2.00501e4    | 651.74005    | 95.3020 |

Totals : 2.10385e4 688.17893

7-(pyridin-2-yl)-4,5,6,7-tetrahydropyrazolo[1,5-a]pyrimidine-3-carbonitrile (**2q**)

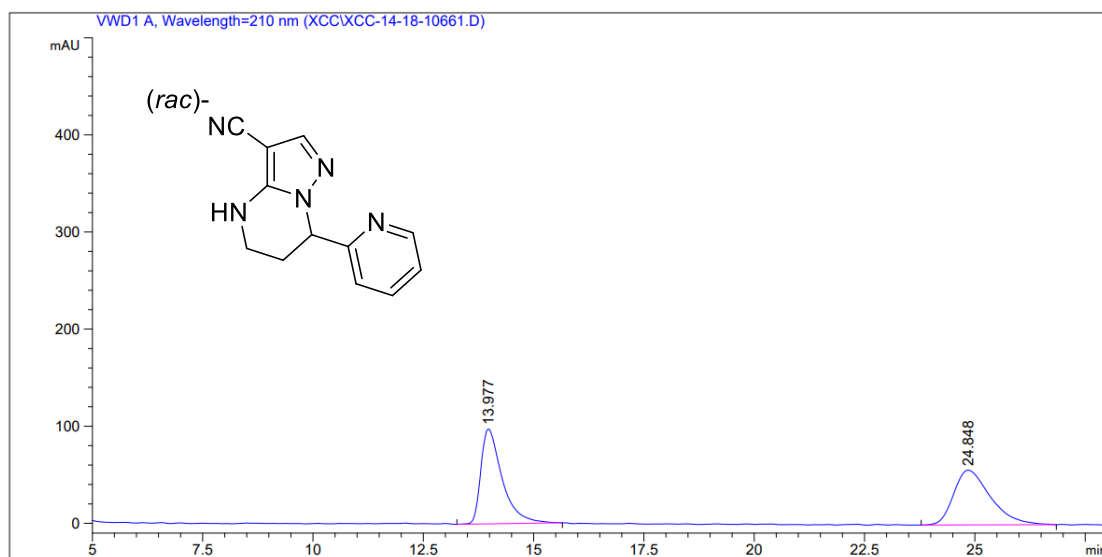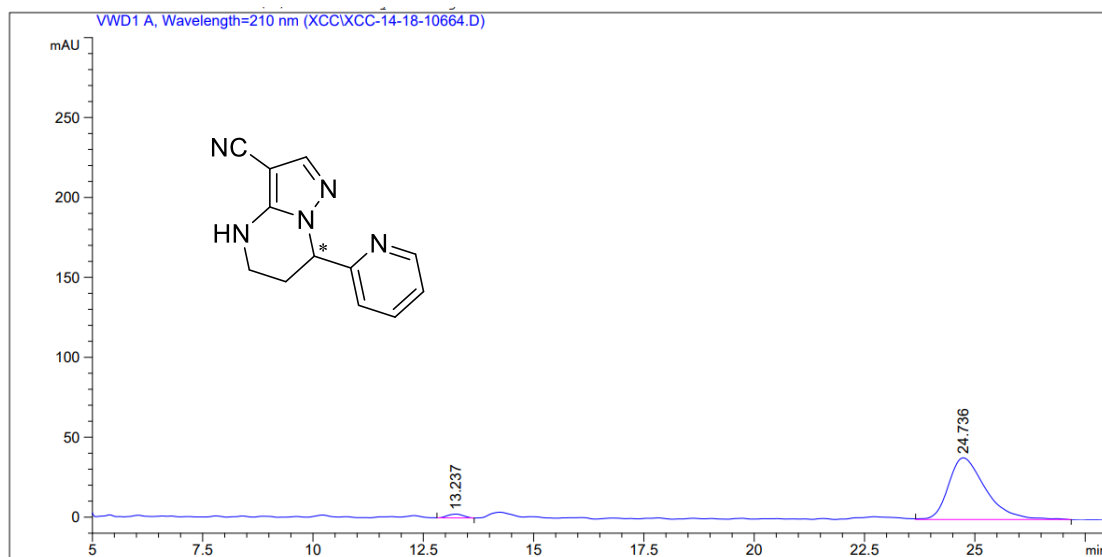

| Peak # | RetTime [min] | Type | Width [min] | Area [mAU*s] | Height [mAU] | Area %  |
|--------|---------------|------|-------------|--------------|--------------|---------|
| 1      | 13.237        | BB   | 0.3993      | 58.56708     | 2.37851      | 2.5396  |
| 2      | 24.736        | VB   | 0.8959      | 2247.62793   | 38.56899     | 97.4604 |

Totals : 2306.19501 40.94750

7-isopropyl-4,5,6,7-tetrahydropyrazolo[1,5-a]pyrimidine-3-carbonitrile (**2r**)

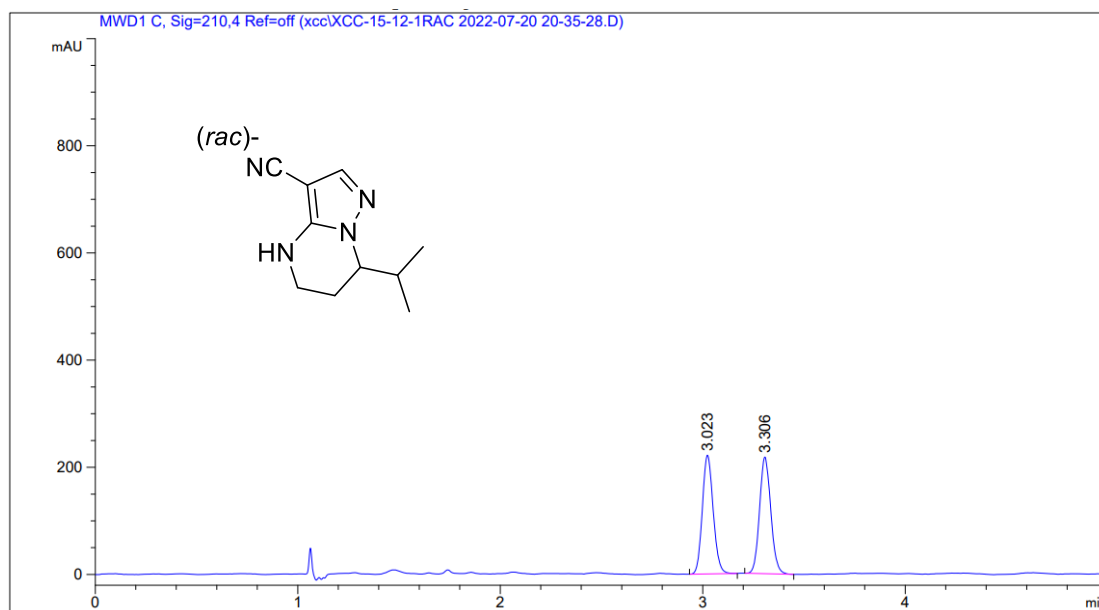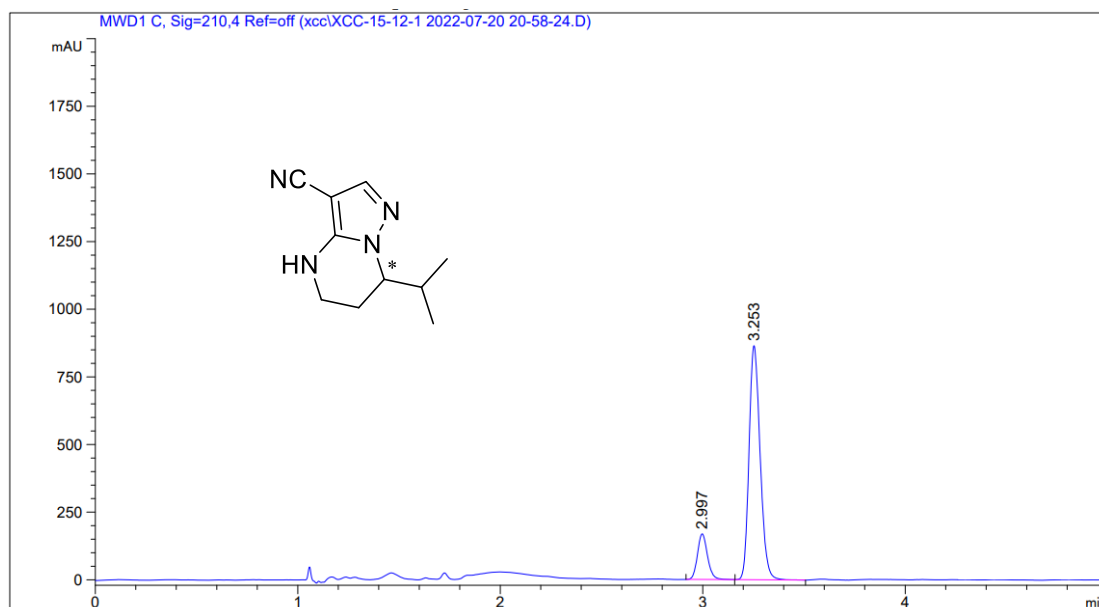

| Peak # | RetTime [min] | Type | Width [min] | Area [mAU*s] | Height [mAU] | Area %  |
|--------|---------------|------|-------------|--------------|--------------|---------|
| 1      | 2.997         | BB   | 0.0531      | 578.97577    | 168.64436    | 14.9544 |
| 2      | 3.253         | BB   | 0.0594      | 3292.63257   | 864.89130    | 85.0456 |

Totals : 3871.60834 1033.53566

7-(*tert*-butyl)-4,5,6,7-tetrahydropyrazolo[1,5-*a*]pyrimidine-3-carbonitrile (**2s**)

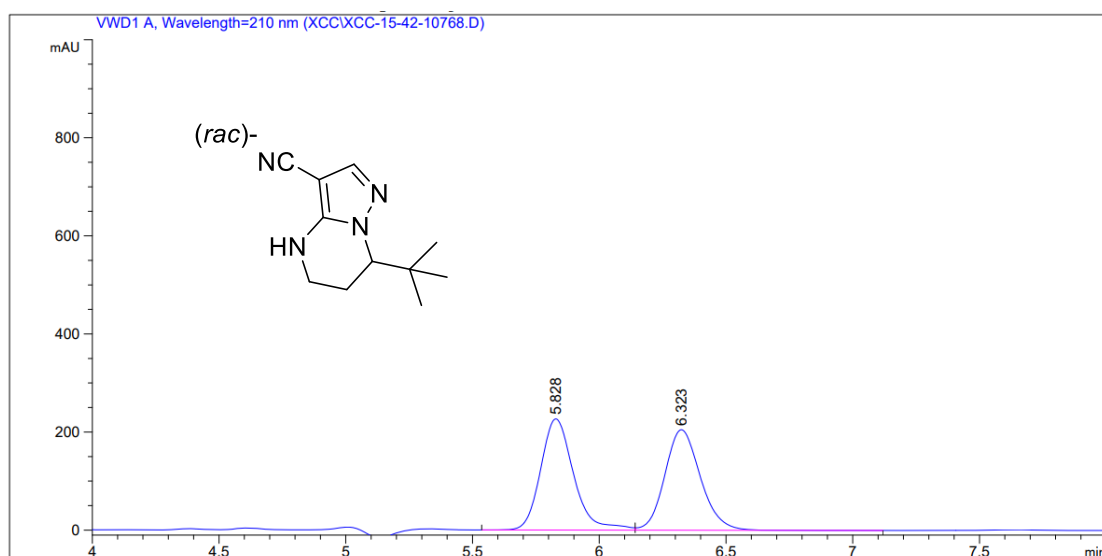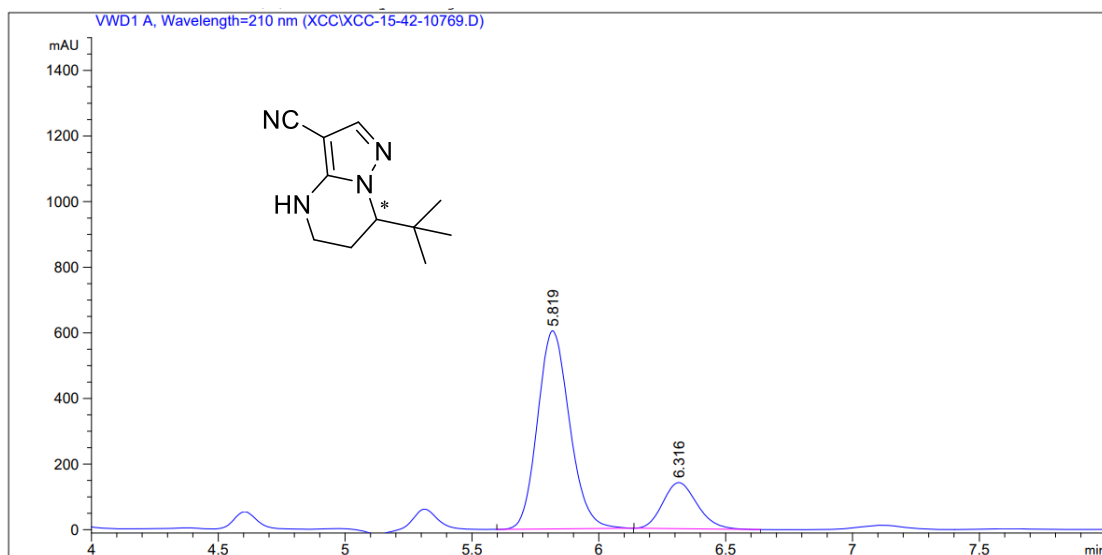

| Peak #   | RetTime [min] | Type | Width [min] | Area [mAU*s] | Height [mAU] | Area %  |
|----------|---------------|------|-------------|--------------|--------------|---------|
| 1        | 5.819         | BB   | 0.1366      | 5313.63574   | 604.05463    | 80.0620 |
| 2        | 6.316         | BB   | 0.1458      | 1323.26538   | 140.60860    | 19.9380 |
| Totals : |               |      |             | 6636.90112   | 744.66322    |         |

*tert*-butyl 4-(3-cyano-2-(4-phenoxyphenyl)-4,5,6,7-tetrahydropyrazolo[1,5-*a*]pyrimidin-7-yl)piperidine-1-carboxylate (**2t**)

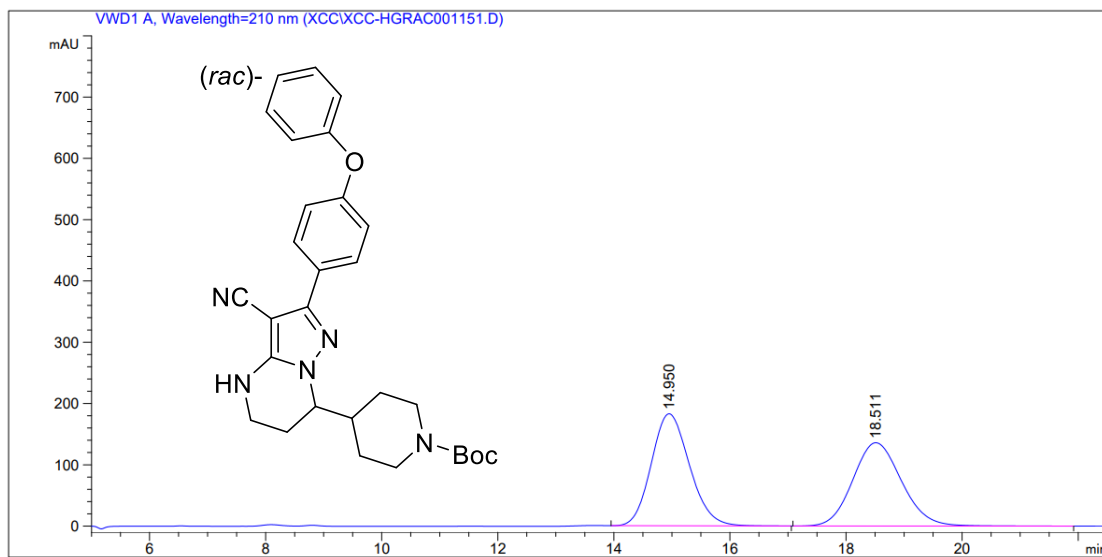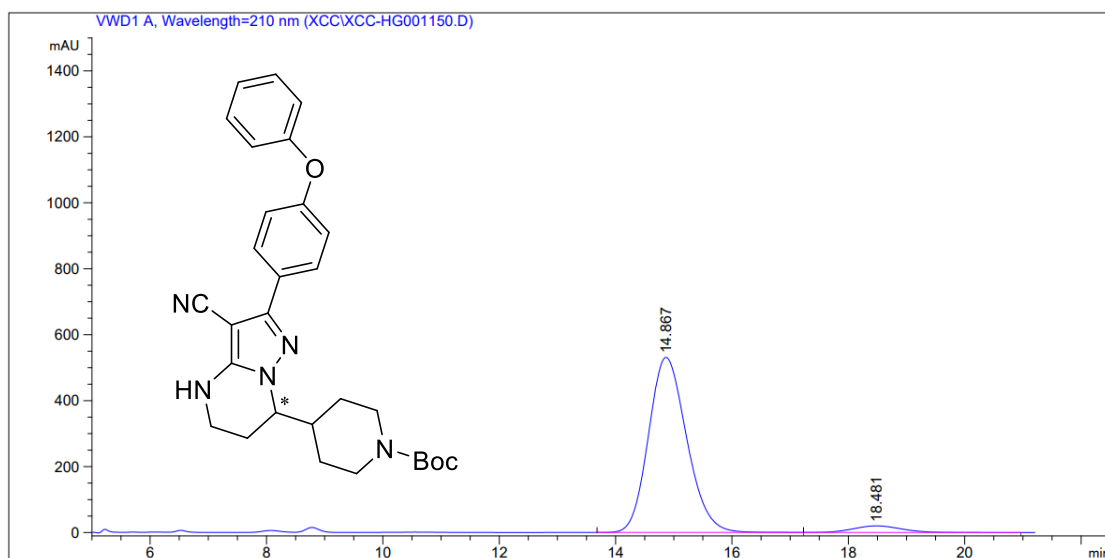

| Peak # | RetTime [min] | Type | Width [min] | Area [mAU*s] | Height [mAU] | Area %  |
|--------|---------------|------|-------------|--------------|--------------|---------|
| 1      | 14.867        | BB   | 0.7102      | 2.42103e4    | 530.74377    | 95.4280 |
| 2      | 18.481        | BB   | 0.8975      | 1159.91797   | 19.97307     | 4.5720  |

Totals : 2.53703e4 550.71685

2,7-diphenyl-4,5,6,7-tetrahydropyrazolo[1,5-a]pyrimidine (**4a**)

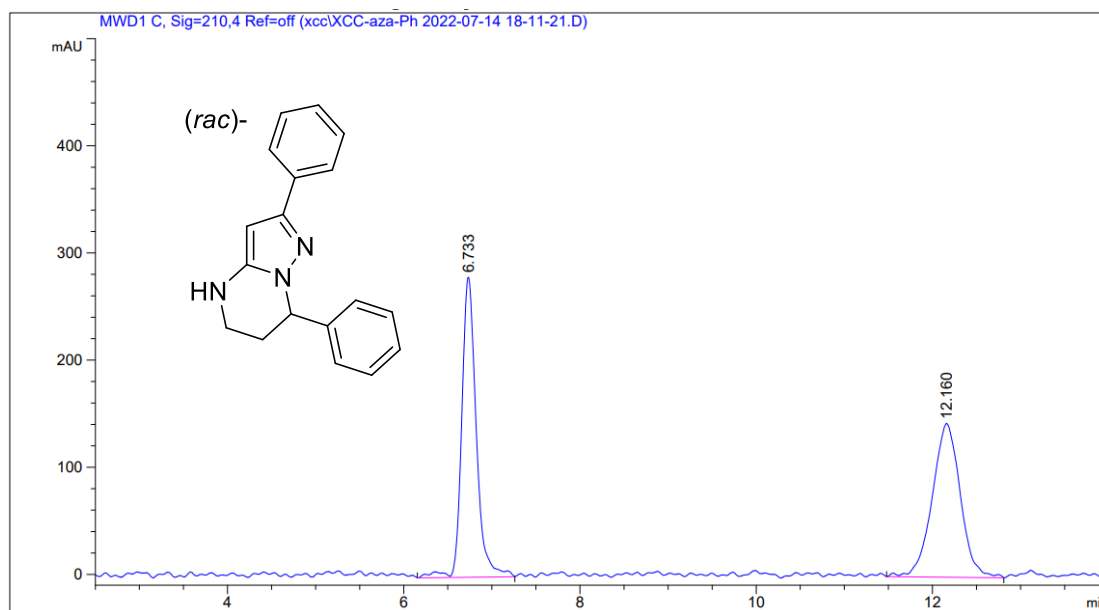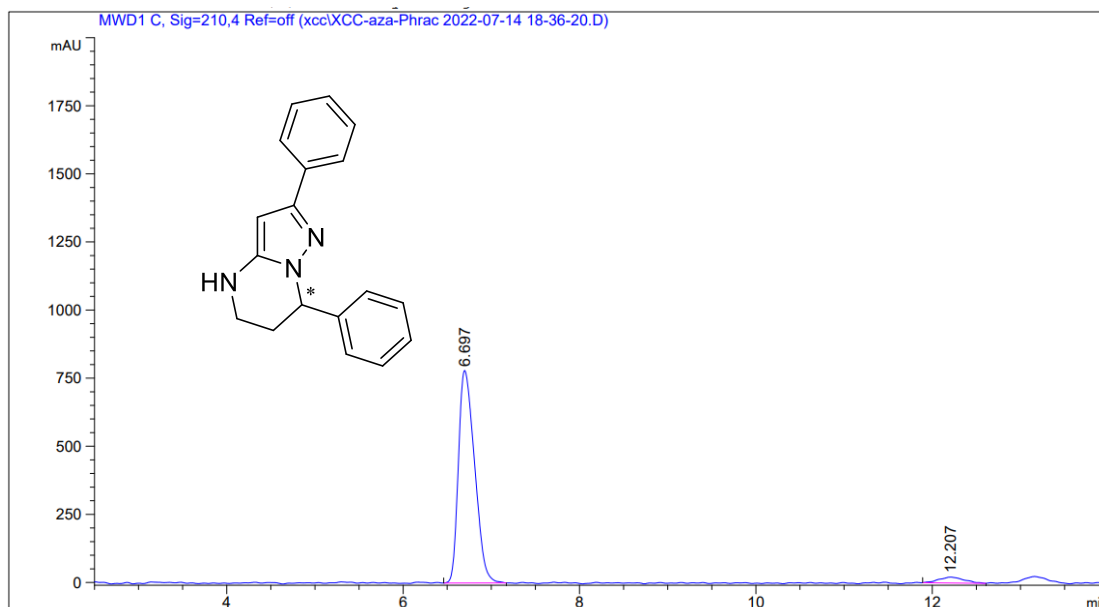

| Peak # | RetTime [min] | Type | Width [min] | Area [mAU*s] | Height [mAU] | Area %  |
|--------|---------------|------|-------------|--------------|--------------|---------|
| 1      | 6.697         | BB   | 0.1917      | 9942.35449   | 780.21906    | 95.8940 |
| 2      | 12.207        | BB   | 0.2329      | 425.70871    | 21.64690     | 4.1060  |

Totals : 1.03681e4 801.86596

7-phenyl-2-(*o*-tolyl)-4,5,6,7-tetrahydropyrazolo[1,5-*a*]pyrimidine (**4b**)

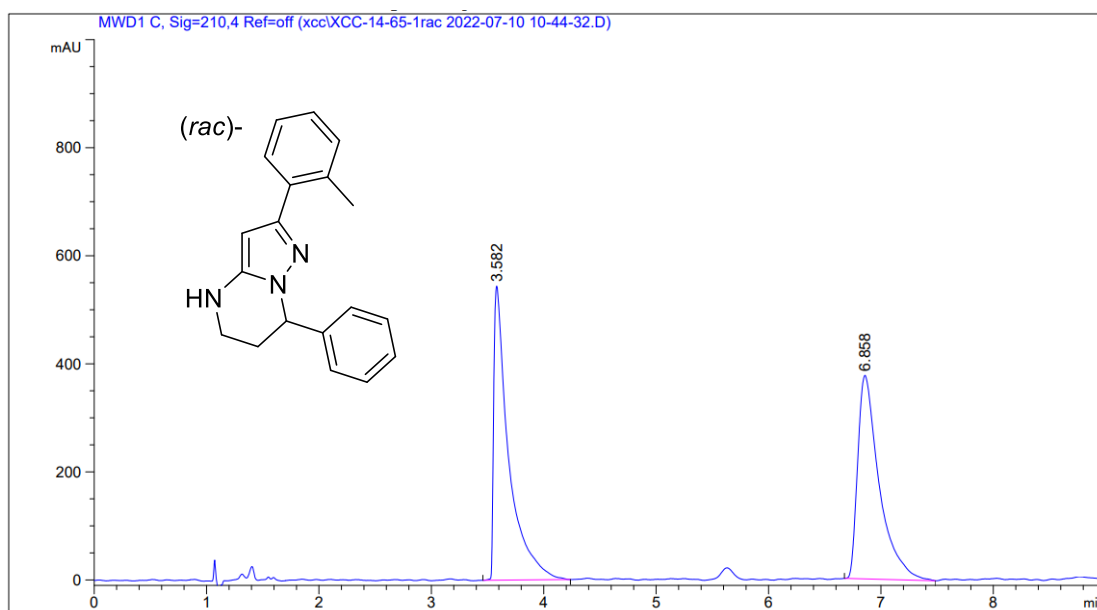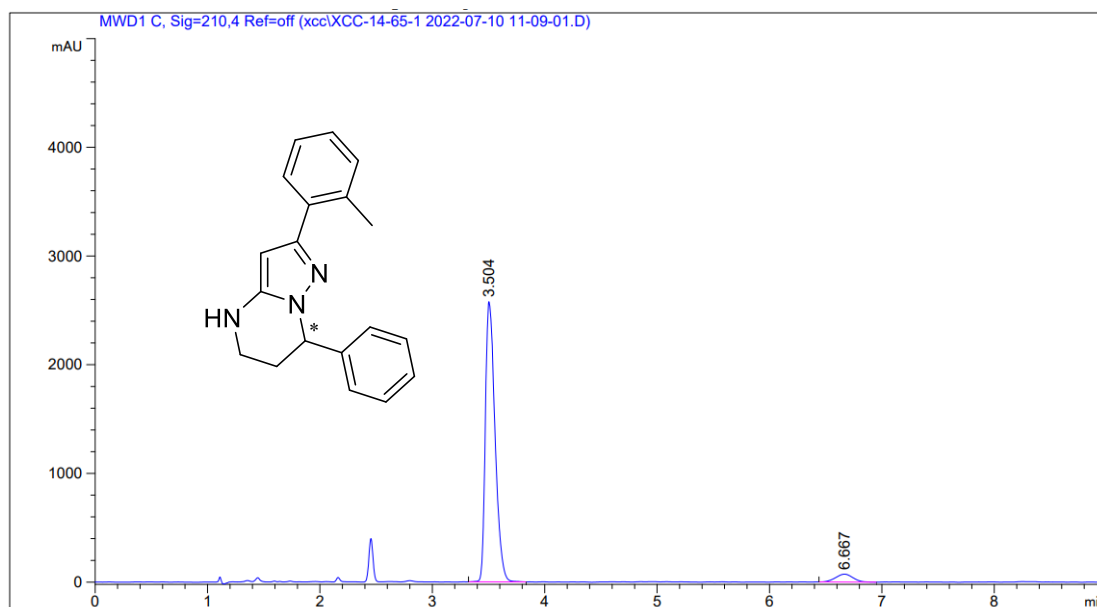

| Peak # | RetTime [min] | Type | Width [min] | Area [mAU*s] | Height [mAU] | Area %  |
|--------|---------------|------|-------------|--------------|--------------|---------|
| 1      | 3.504         | BB   | 0.0884      | 1.54357e4    | 2577.53296   | 95.2120 |
| 2      | 6.667         | BB   | 0.1560      | 776.21973    | 72.44343     | 4.7880  |

Totals : 1.62119e4 2649.97639

7-(2-methoxyphenyl)-4,5,6,7-tetrahydropyrazolo[1,5-a]pyrimidine-3-carbonitrile (**4c**)

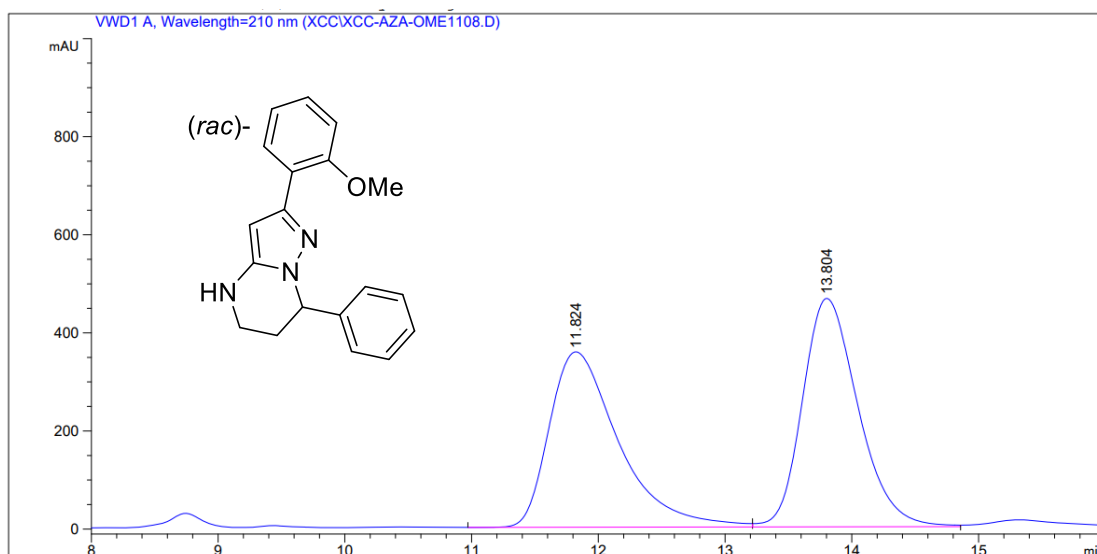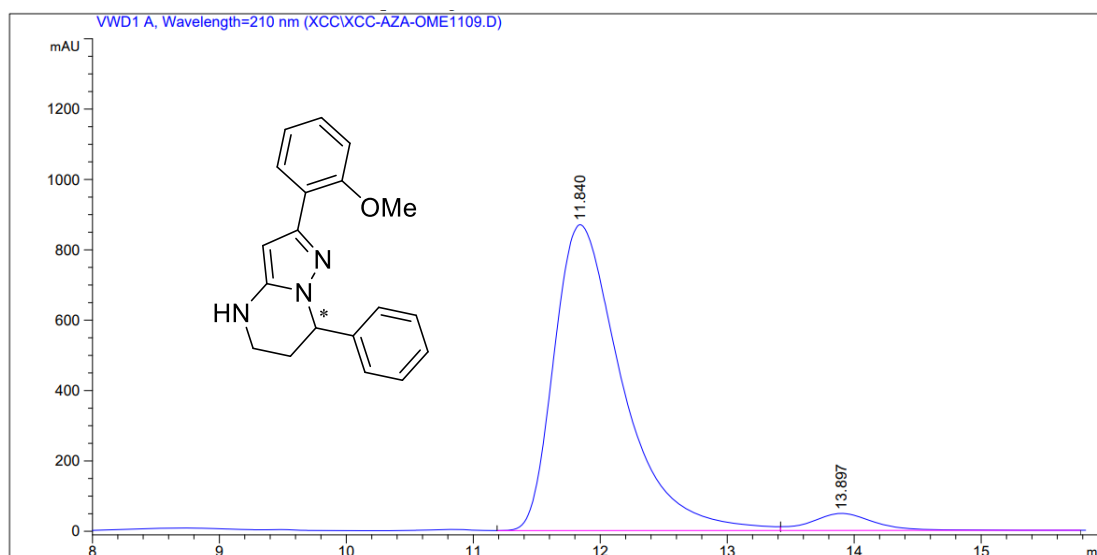

| Peak #   | RetTime [min] | Type | Width [min] | Area [mAU*s] | Height [mAU] | Area %  |
|----------|---------------|------|-------------|--------------|--------------|---------|
| 1        | 11.840        | VV   | 0.5664      | 3.23675e4    | 869.33826    | 95.1623 |
| 2        | 13.897        | VB   | 0.5107      | 1645.44849   | 48.26830     | 4.8377  |
| Totals : |               |      |             | 3.40130e4    | 917.60656    |         |



7-phenyl-2-(*m*-tolyl)-4,5,6,7-tetrahydropyrazolo[1,5-*a*]pyrimidine (**4d**)

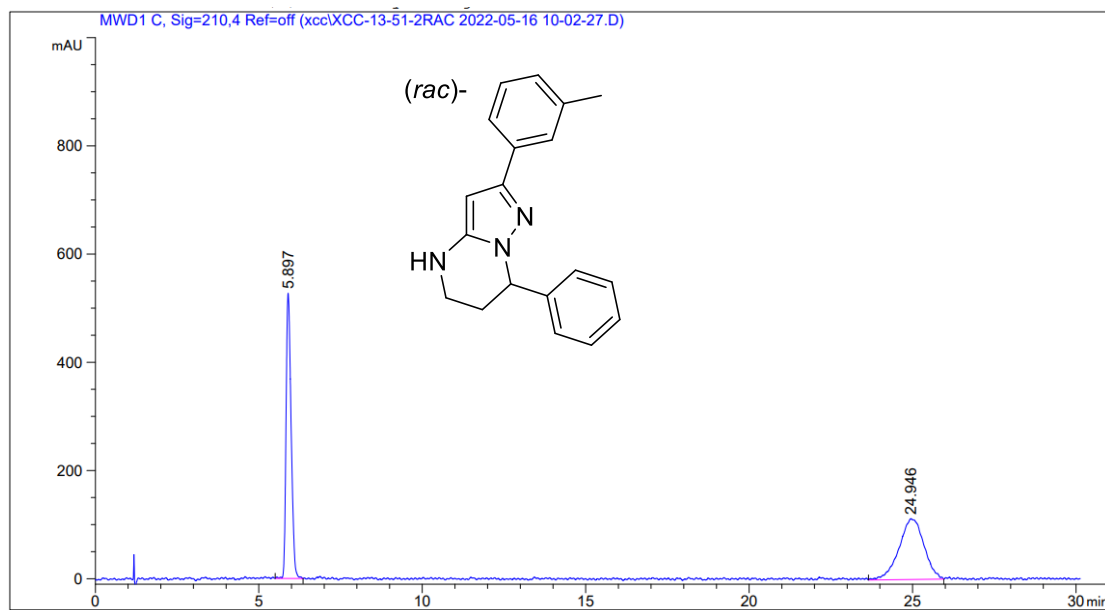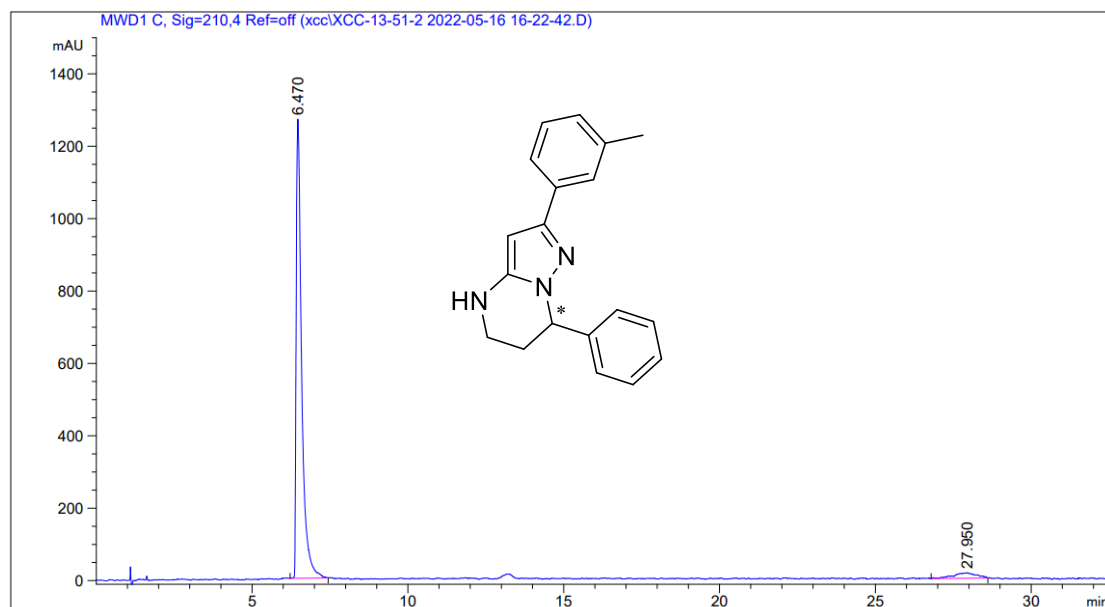

| Peak # | RetTime [min] | Type | Width [min] | Area [mAU*s] | Height [mAU] | Area %  |
|--------|---------------|------|-------------|--------------|--------------|---------|
| 1      | 6.470         | BB   | 0.1806      | 1.53949e4    | 1268.03137   | 95.1872 |
| 2      | 27.950        | BB   | 0.6168      | 778.38605    | 15.16570     | 4.8128  |

Totals : 1.61733e4 1283.19707

7-phenyl-2-(*p*-tolyl)-4,5,6,7-tetrahydropyrazolo[1,5-*a*]pyrimidine (**4e**)

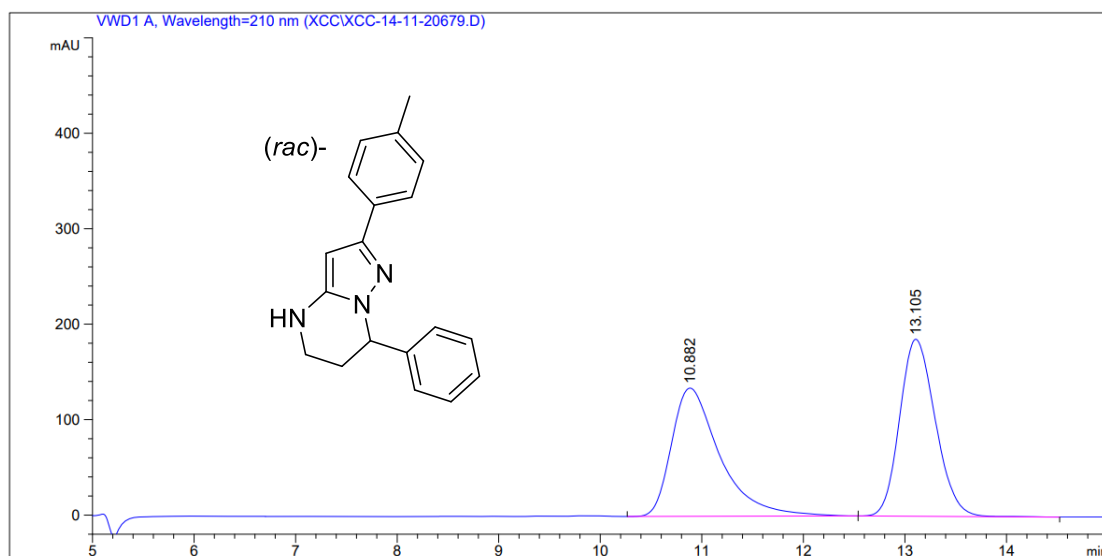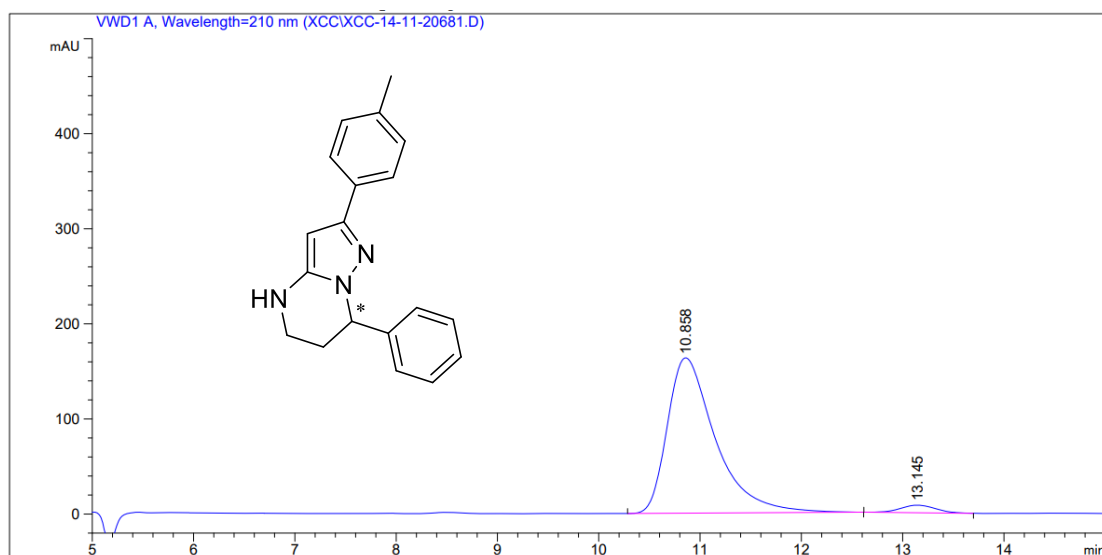

| Peak # | RetTime [min] | Type | Width [min] | Area [mAU*s] | Height [mAU] | Area %  |
|--------|---------------|------|-------------|--------------|--------------|---------|
| 1      | 10.858        | BB   | 0.4944      | 5384.78857   | 163.42589    | 96.5632 |
| 2      | 13.145        | BB   | 0.3704      | 191.64958    | 8.03140      | 3.4368  |

Totals : 5576.43816 171.45729

2-(4-methoxyphenyl)-7-phenyl-4,5,6,7-tetrahydropyrazolo[1,5-a]pyrimidine (**4f**)

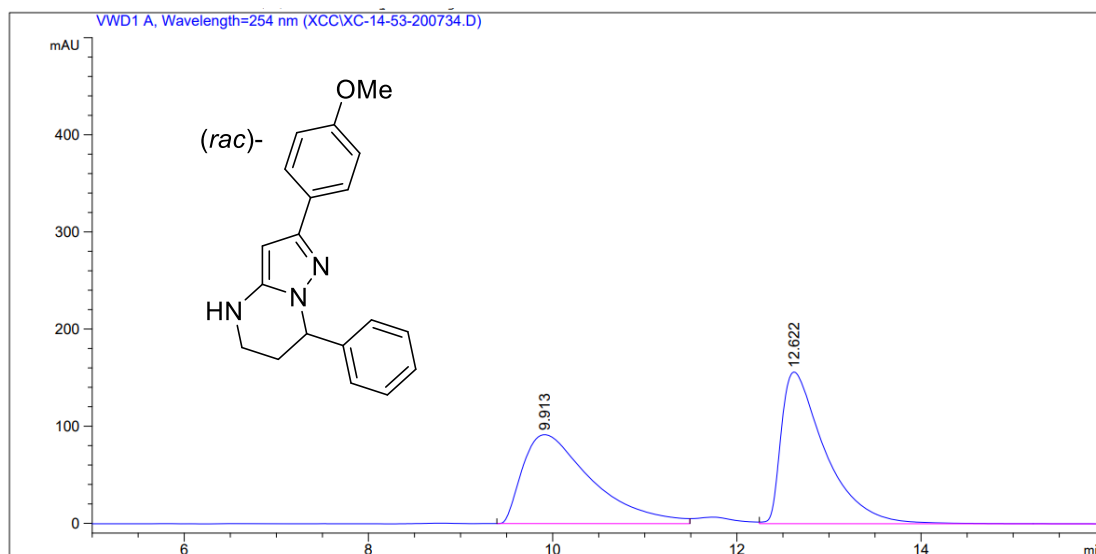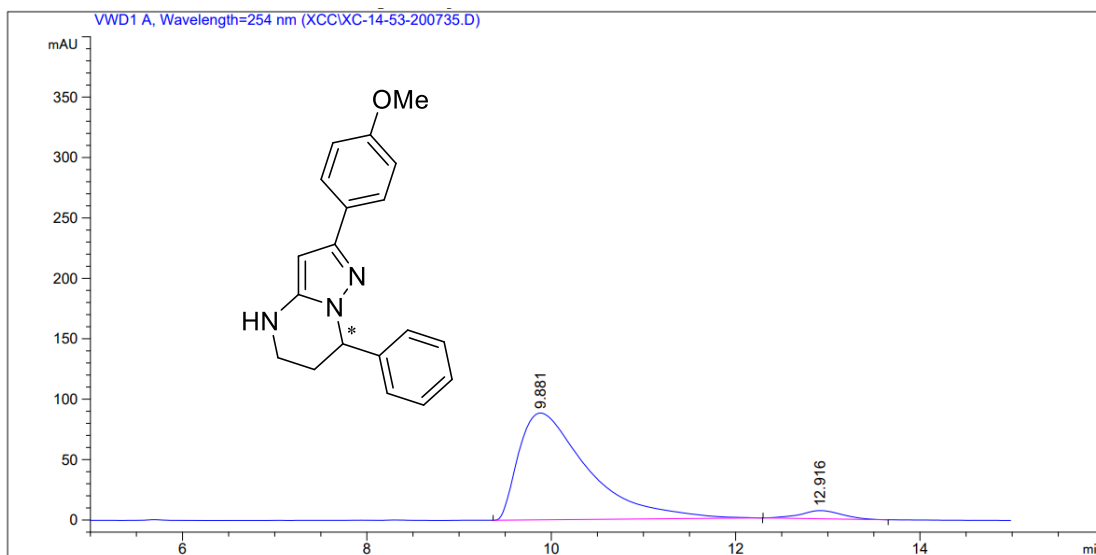

| Peak # | RetTime [min] | Type | Width [min] | Area [mAU*s] | Height [mAU] | Area %  |
|--------|---------------|------|-------------|--------------|--------------|---------|
| 1      | 9.881         | BB   | 0.7852      | 4616.51123   | 88.41042     | 95.5986 |
| 2      | 12.916        | BBA  | 0.4757      | 212.54488    | 6.78152      | 4.4014  |

Totals : 4829.05611 95.19194

2-(2-chlorophenyl)-7-phenyl-4,5,6,7-tetrahydropyrazolo[1,5-a]pyrimidine (**4g**)

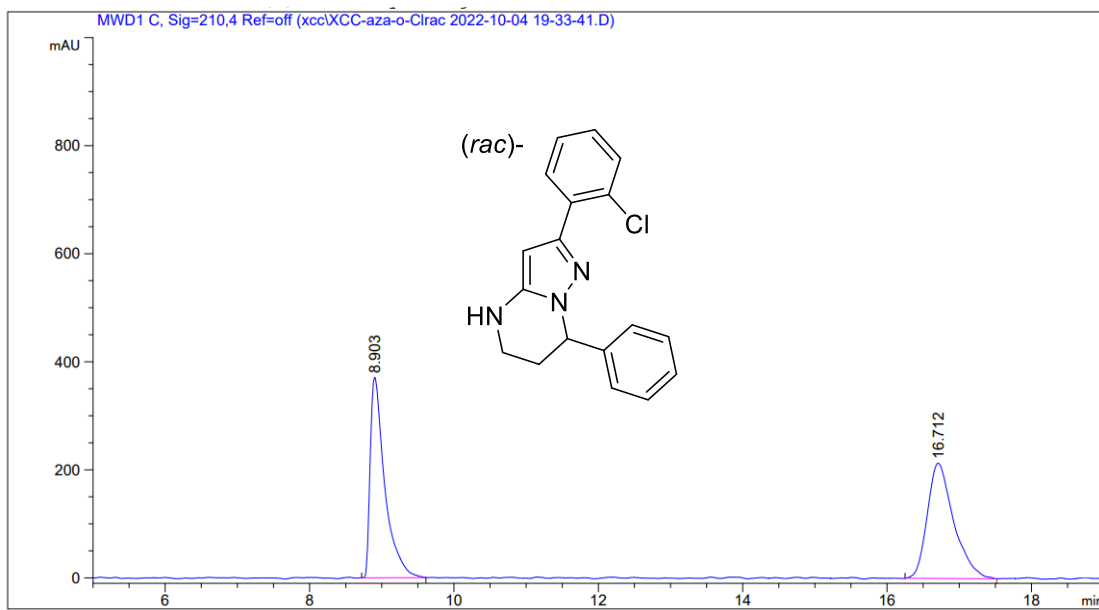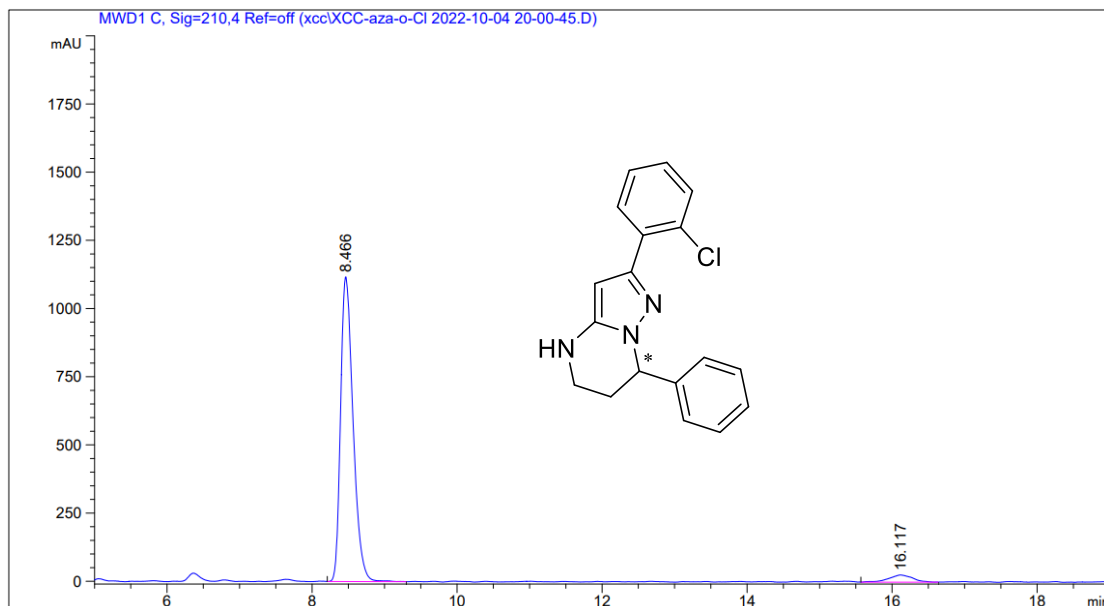

| Peak # | RetTime [min] | Type | Width [min] | Area [mAU*s] | Height [mAU] | Area %  |
|--------|---------------|------|-------------|--------------|--------------|---------|
| 1      | 8.466         | BB   | 0.1855      | 1.33608e4    | 1117.37659   | 95.6663 |
| 2      | 16.117        | BB   | 0.3113      | 605.25043    | 26.21869     | 4.3337  |

Totals : 1.39661e4 1143.59528

2-(3-fluorophenyl)-7-phenyl-4,5,6,7-tetrahydropyrazolo[1,5-a]pyrimidine (**4h**)

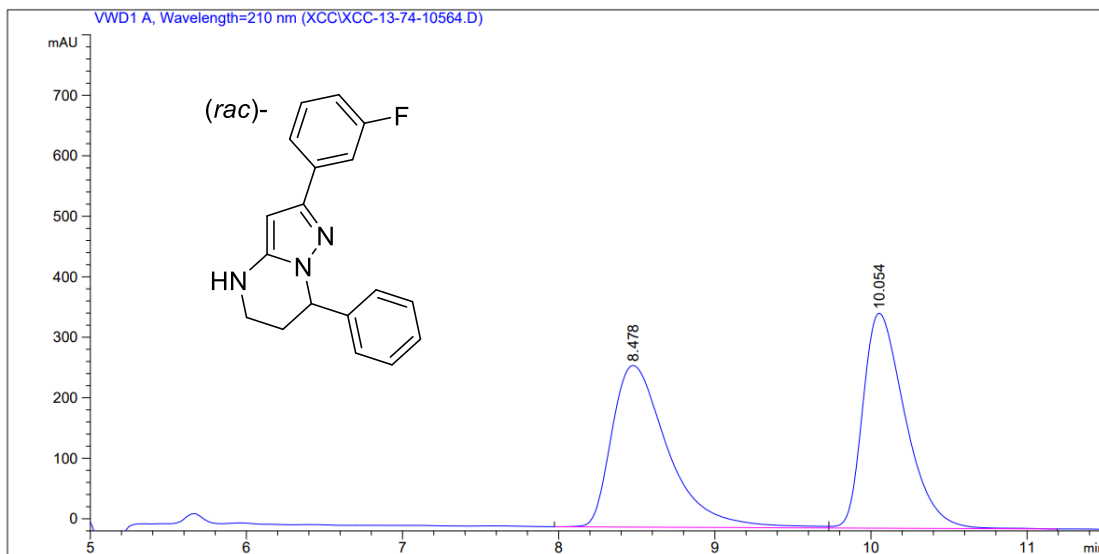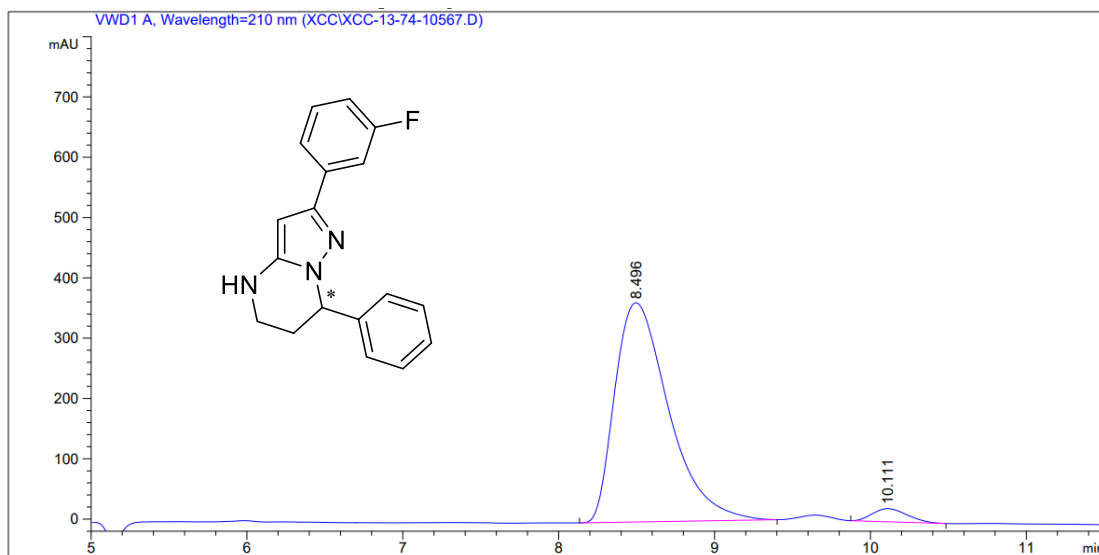

| Peak # | RetTime [min] | Type | Width [min] | Area [mAU*s] | Height [mAU] | Area %  |
|--------|---------------|------|-------------|--------------|--------------|---------|
| 1      | 8.496         | BB   | 0.3744      | 8738.81836   | 363.55539    | 96.2781 |
| 2      | 10.111        | BB   | 0.2446      | 337.82162    | 21.82385     | 3.7219  |

Totals : 9076.63998 385.37924

2-(4-fluorophenyl)-7-phenyl-4,5,6,7-tetrahydropyrazolo[1,5-a]pyrimidine (**4i**)

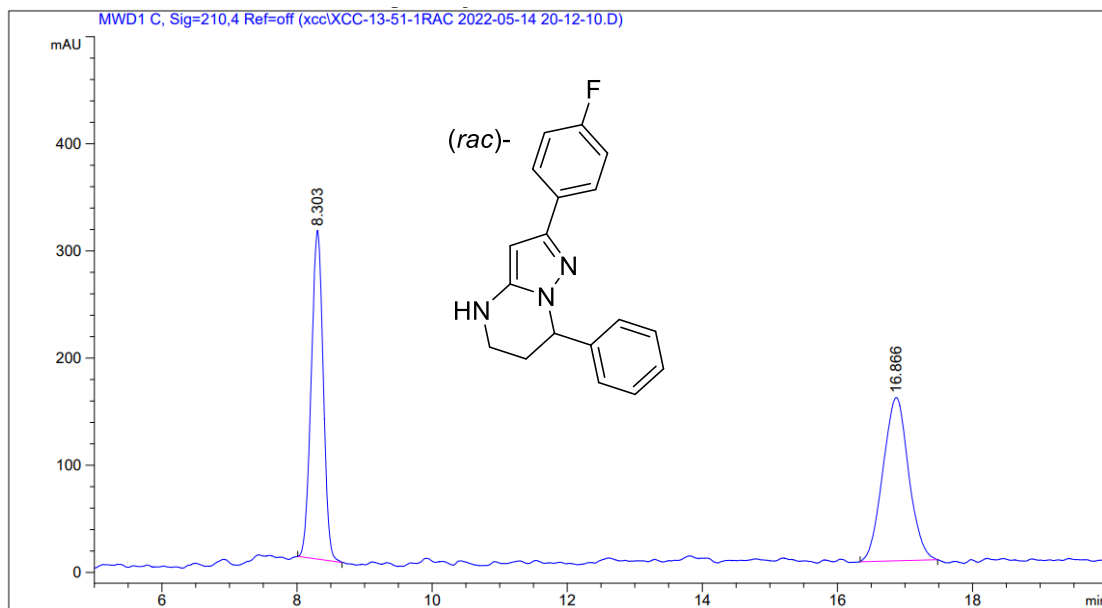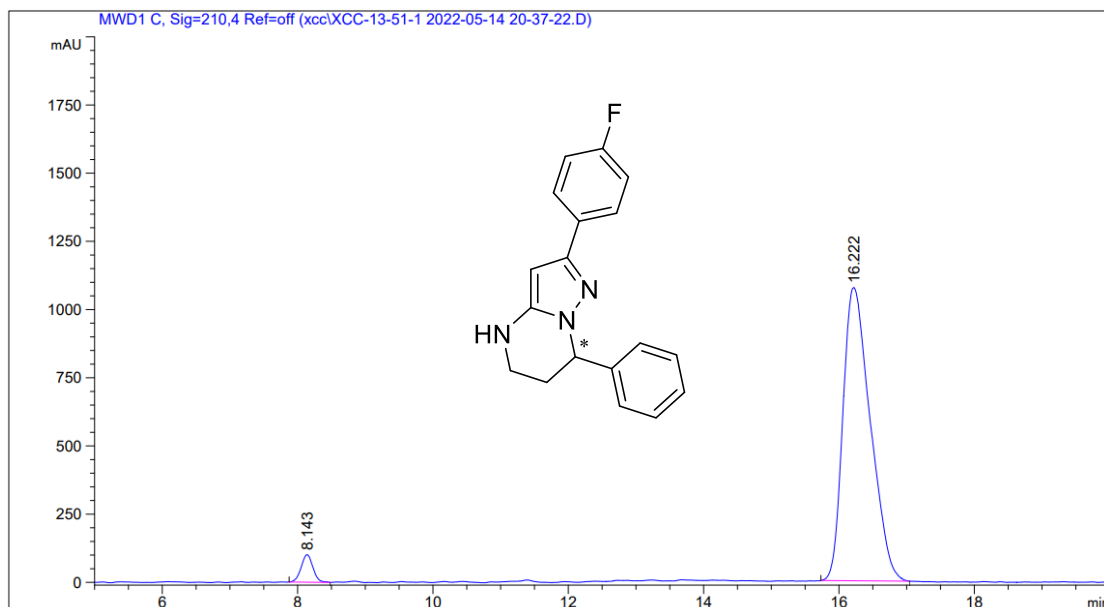

| Peak # | RetTime [min] | Type | Width [min] | Area [mAU*s] | Height [mAU] | Area %  |
|--------|---------------|------|-------------|--------------|--------------|---------|
| 1      | 8.143         | BB   | 0.1543      | 1221.59644   | 100.85883    | 3.8958  |
| 2      | 16.222        | BB   | 0.3321      | 3.01353e4    | 1074.79321   | 96.1042 |

Totals : 3.13569e4 1175.65205

2-(4-chlorophenyl)-7-phenyl-4,5,6,7-tetrahydropyrazolo[1,5-*a*]pyrimidine (**4j**)

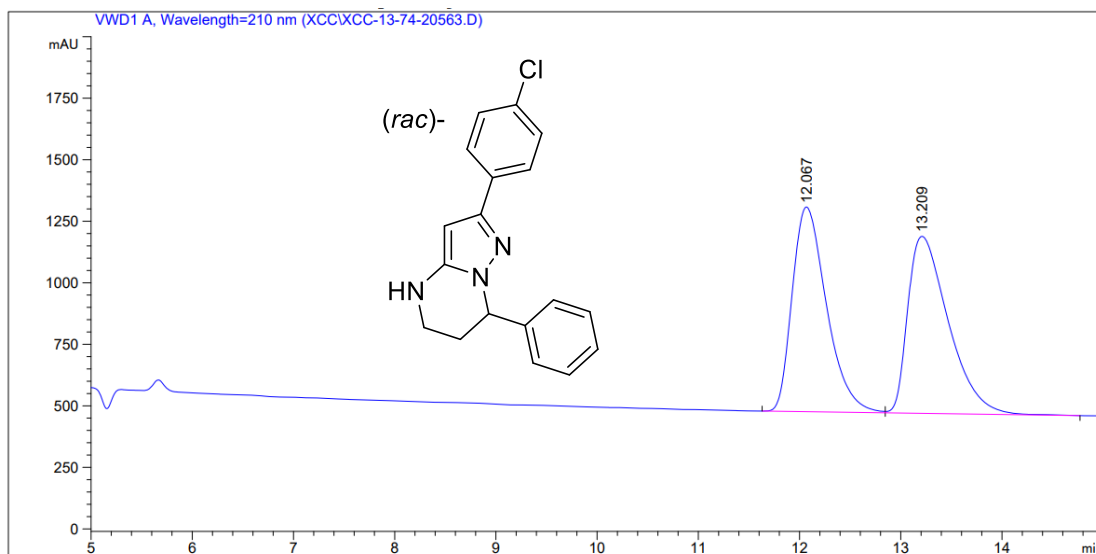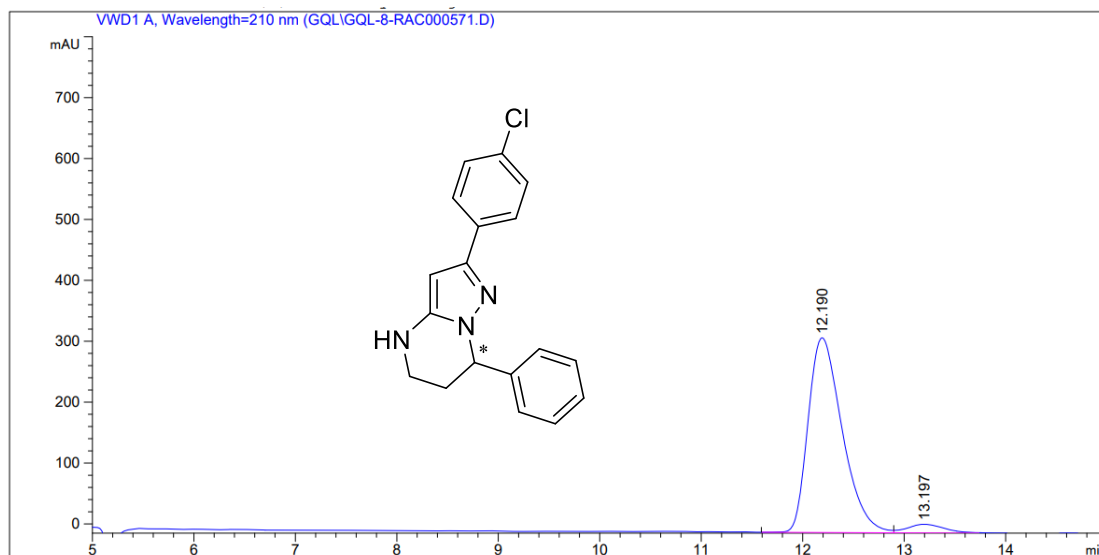

| Peak # | RetTime [min] | Type | Width [min] | Area [mAU*s] | Height [mAU] | Area %  |
|--------|---------------|------|-------------|--------------|--------------|---------|
| 1      | 12.190        | BV   | 0.3599      | 7448.48877   | 319.55609    | 95.3664 |
| 2      | 13.197        | VB   | 0.3854      | 361.90259    | 14.19566     | 4.6336  |

Totals : 7810.39136 333.75175

2-(4-bromophenyl)-7-phenyl-4,5,6,7-tetrahydropyrazolo[1,5-a]pyrimidine (**4k**)

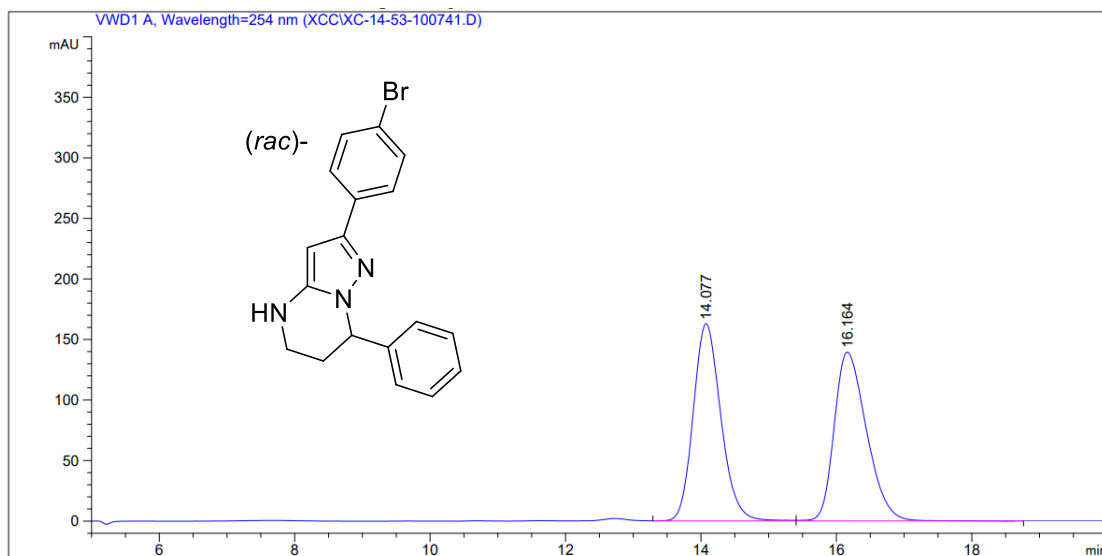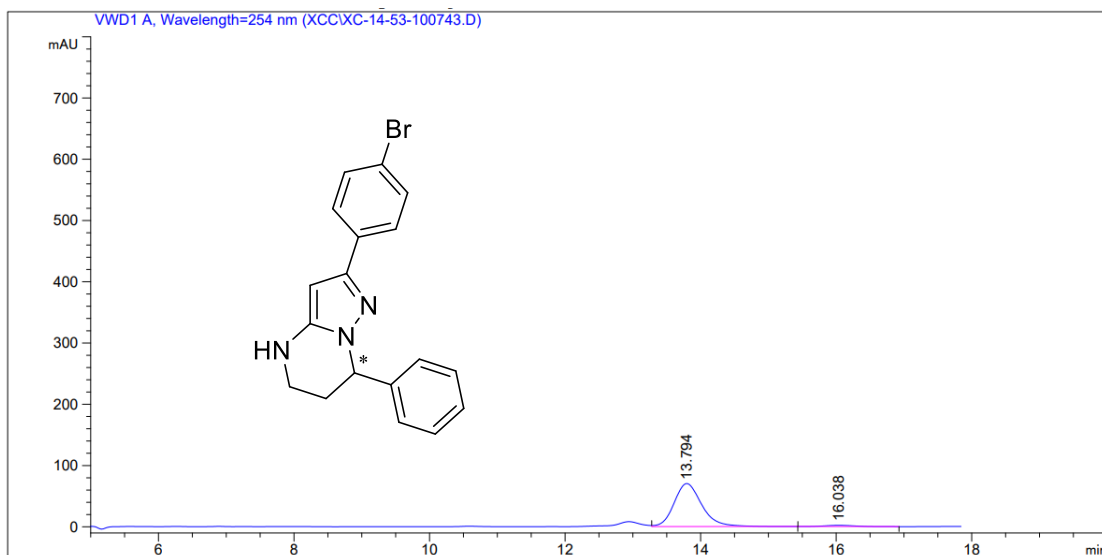

| Peak #   | RetTime [min] | Type | Width [min] | Area [mAU*s] | Height [mAU] | Area %  |
|----------|---------------|------|-------------|--------------|--------------|---------|
| 1        | 13.794        | VB   | 0.4349      | 1990.88904   | 70.20167     | 97.0279 |
| 2        | 16.038        | BB   | 0.4697      | 60.98322     | 2.01162      | 2.9721  |
| Totals : |               |      |             | 2051.87226   | 72.21328     |         |



7-phenyl-2-(4-(trifluoromethyl)phenyl)-4,5,6,7-tetrahydropyrazolo[1,5-a]pyrimidine

(4I)

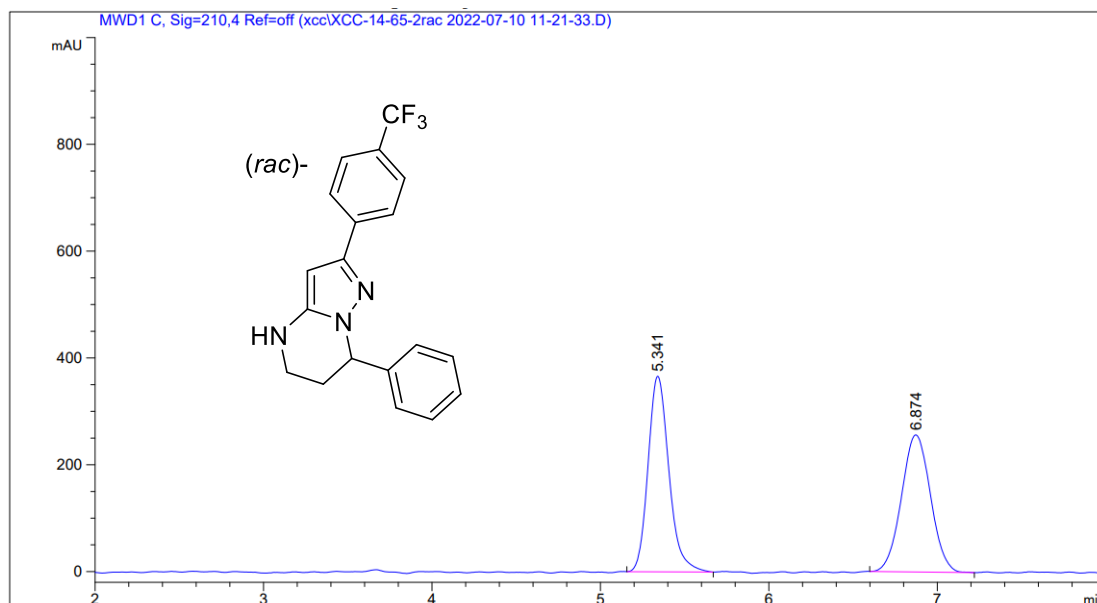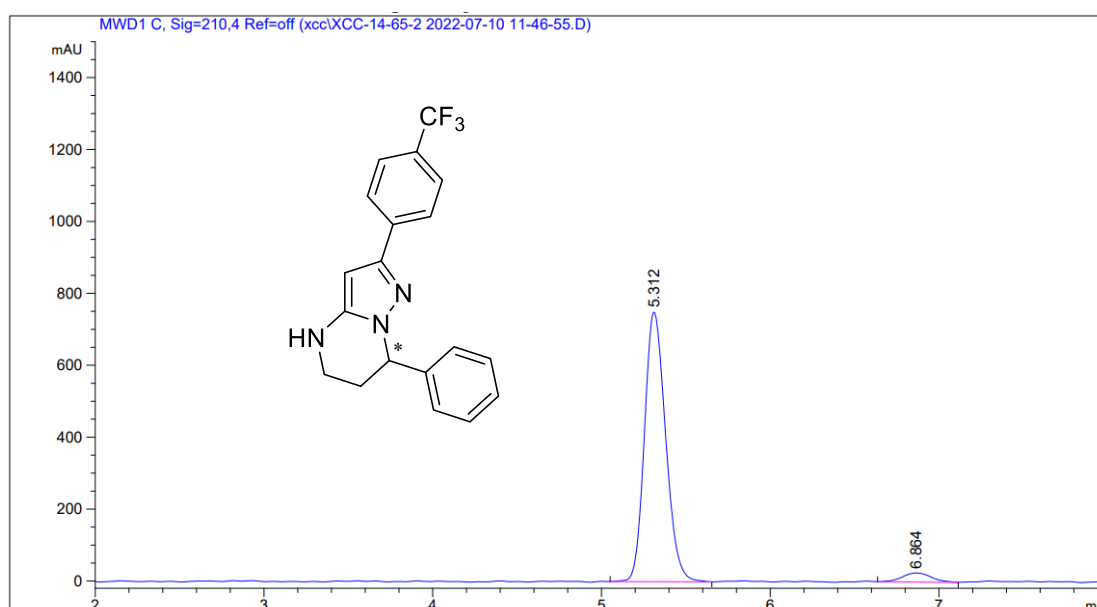

| Peak #   | RetTime [min] | Type | Width [min] | Area [mAU*s] | Height [mAU] | Area %  |
|----------|---------------|------|-------------|--------------|--------------|---------|
| 1        | 5.312         | BB   | 0.1352      | 6536.08594   | 749.73846    | 95.6197 |
| 2        | 6.864         | BB   | 0.1485      | 299.41840    | 25.21825     | 4.3803  |
| Totals : |               |      |             | 6835.50433   | 774.95671    |         |

2-(naphthalen-2-yl)-7-phenyl-4,5,6,7-tetrahydropyrazolo[1,5-*a*]pyrimidine (**4m**)

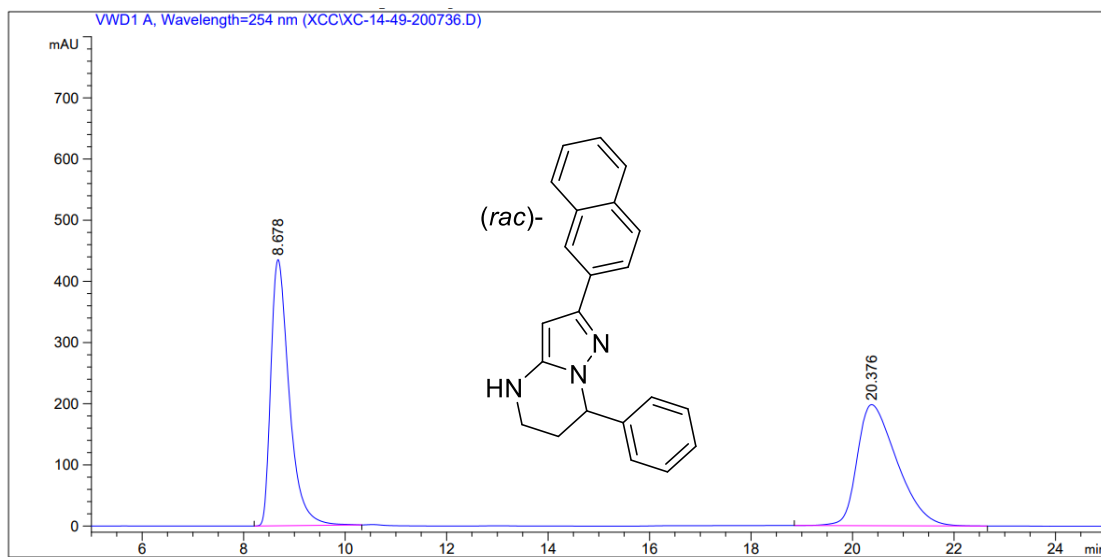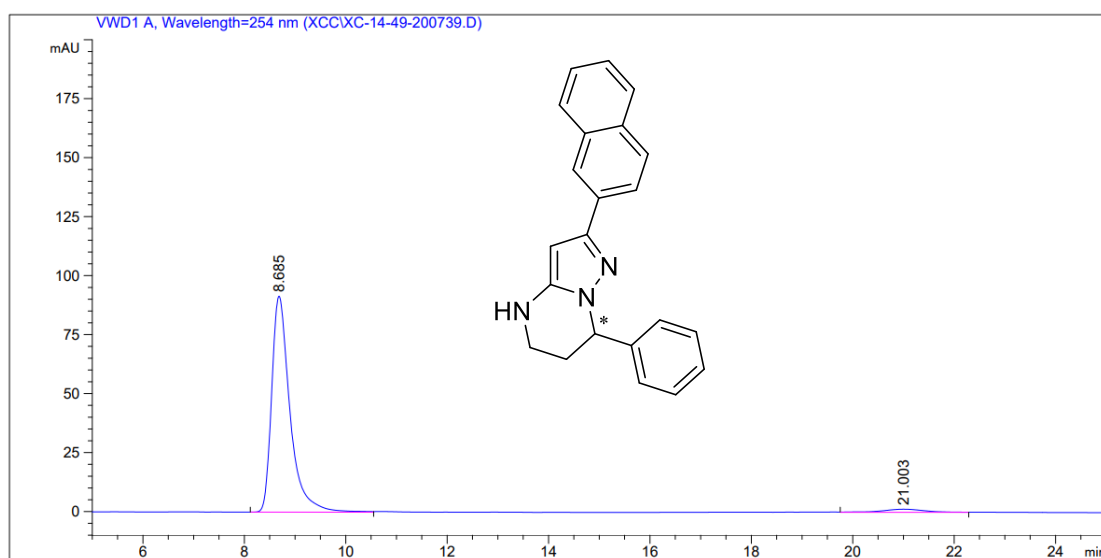

| Peak # | RetTime [min] | Type | Width [min] | Area [mAU*s] | Height [mAU] | Area %  |
|--------|---------------|------|-------------|--------------|--------------|---------|
| 1      | 8.685         | BV   | 0.3781      | 2291.18457   | 91.51552     | 96.7304 |
| 2      | 21.003        | VV   | 0.8588      | 77.44549     | 1.31556      | 3.2696  |

Totals : 2368.63006 92.83108

7-phenyl-2-(thiophen-2-yl)-4,5,6,7-tetrahydropyrazolo[1,5-a]pyrimidine (**4n**)

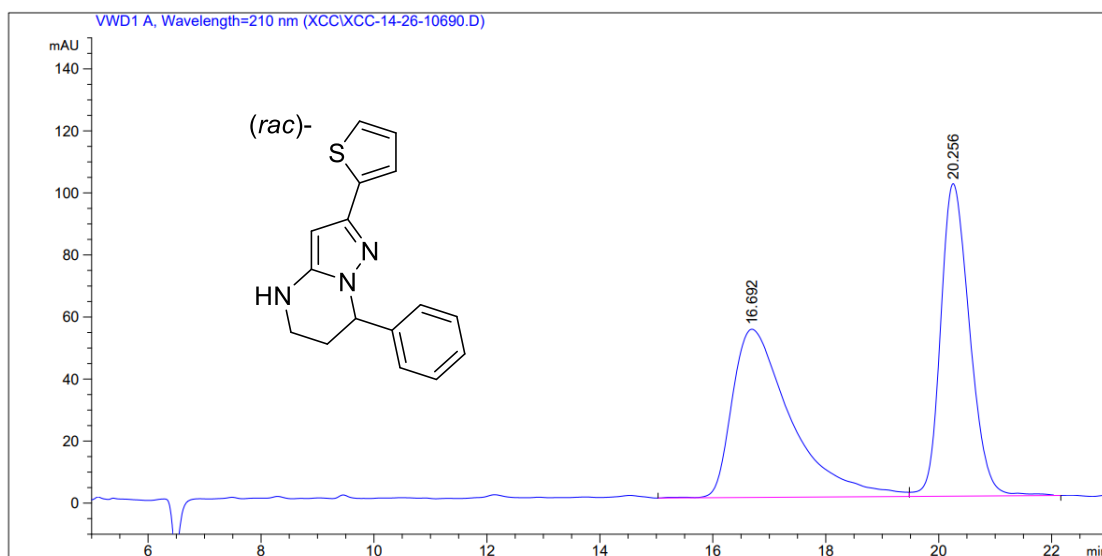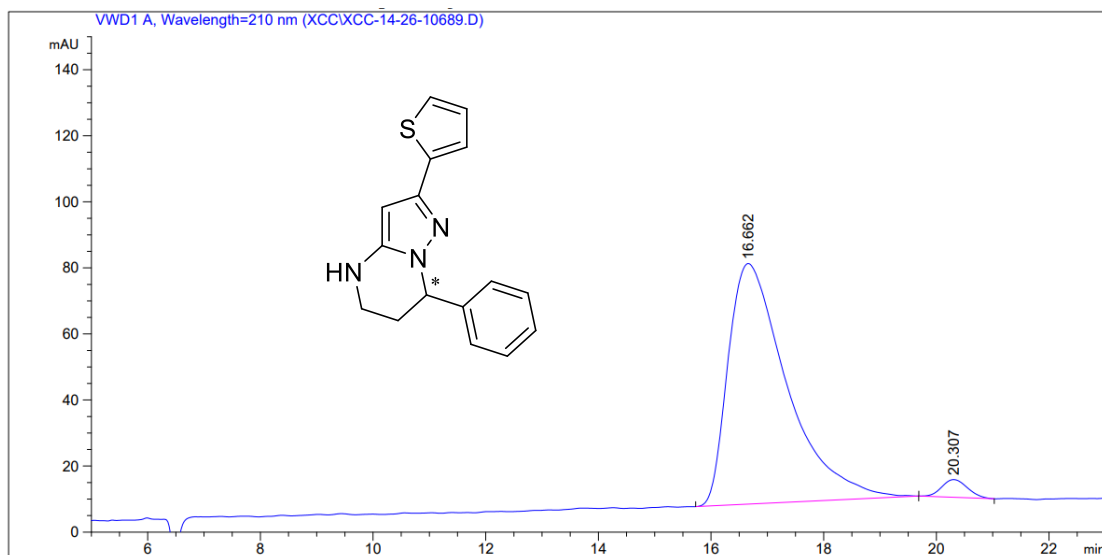

| Peak # | RetTime [min] | Type | Width [min] | Area [mAU*s] | Height [mAU] | Area %  |
|--------|---------------|------|-------------|--------------|--------------|---------|
| 1      | 16.662        | BB   | 1.0983      | 5296.42334   | 72.83888     | 96.8850 |
| 2      | 20.307        | BB   | 0.4946      | 170.28668    | 5.36098      | 3.1150  |

Totals : 5466.71002 78.19987

2-(furan-2-yl)-7-phenyl-4,5,6,7-tetrahydropyrazolo[1,5-*a*]pyrimidine (**4o**)

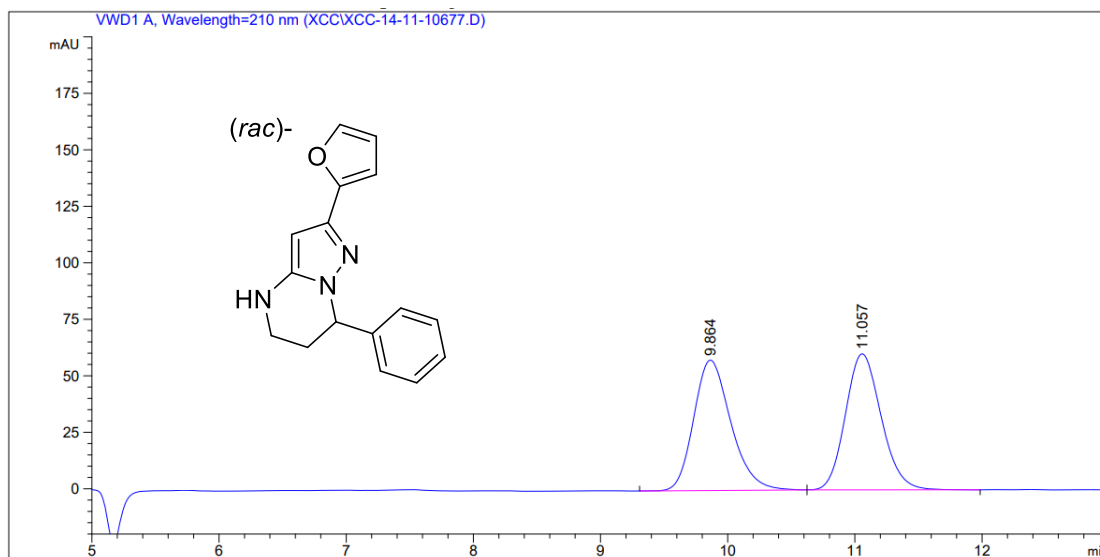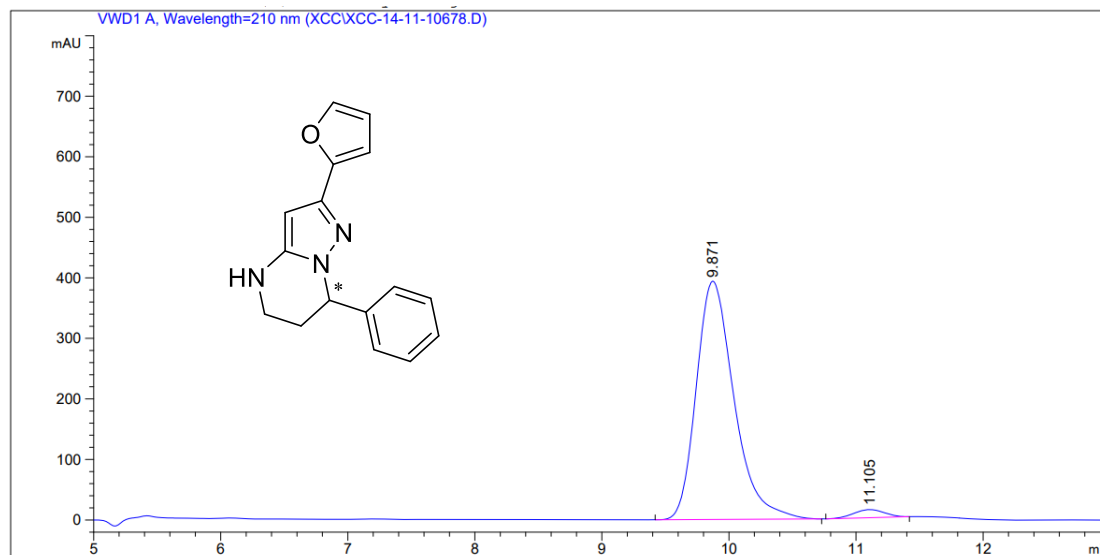

| Peak # | RetTime [min] | Type | Width [min] | Area [mAU*s] | Height [mAU] | Area %  |
|--------|---------------|------|-------------|--------------|--------------|---------|
| 1      | 9.871         | BB   | 0.3170      | 8128.21533   | 393.55322    | 97.2984 |
| 2      | 11.105        | BB   | 0.2673      | 225.69115    | 13.41588     | 2.7016  |

Totals : 8353.90648 406.96911

7-phenyl-4,5,6,7-tetrahydropyrazolo[1,5-a]pyrimidine (**4p**)

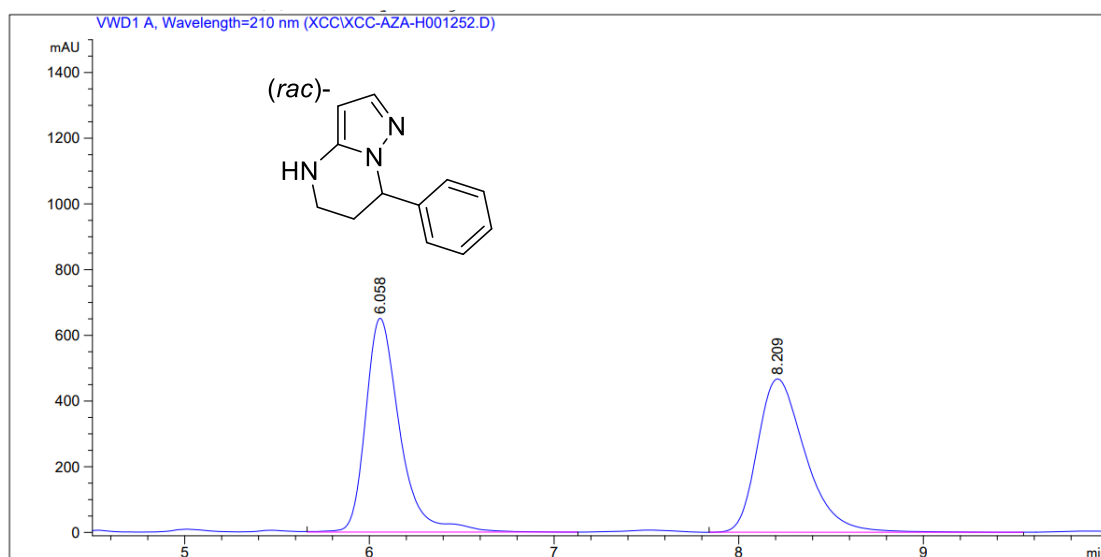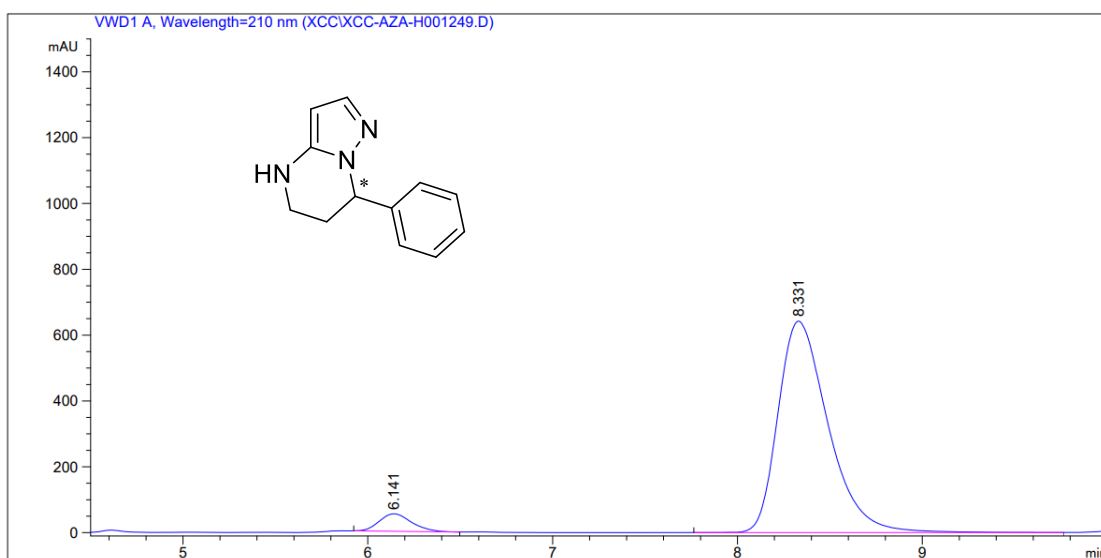

| Peak # | RetTime [min] | Type | Width [min] | Area [mAU*s] | Height [mAU] | Area %  |
|--------|---------------|------|-------------|--------------|--------------|---------|
| 1      | 6.141         | BB   | 0.1886      | 645.44043    | 53.18734     | 5.0677  |
| 2      | 8.331         | BB   | 0.2886      | 1.20908e4    | 642.23553    | 94.9323 |

Totals : 1.27363e4 695.42288

2-(*tert*-butyl)-7-phenyl-4,5,6,7-tetrahydropyrazolo[1,5-*a*]pyrimidine (**4q**)

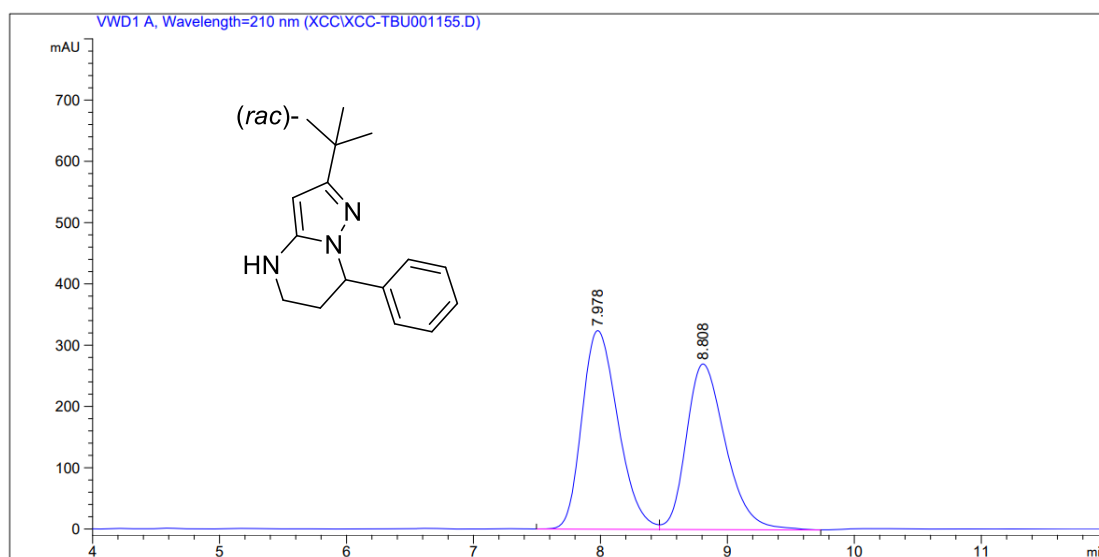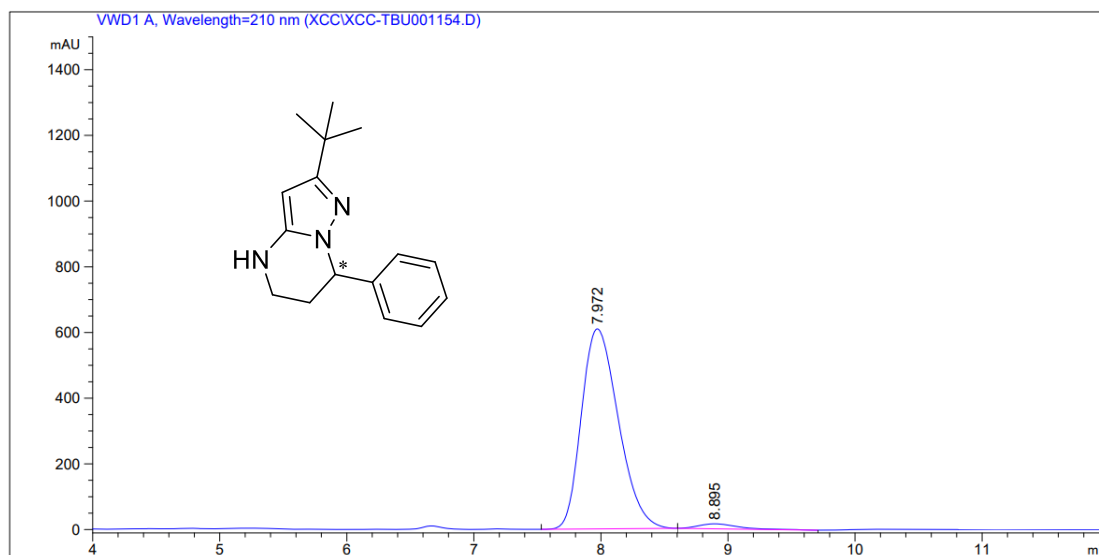

| Peak # | RetTime [min] | Type | Width [min] | Area [mAU*s] | Height [mAU] | Area %  |
|--------|---------------|------|-------------|--------------|--------------|---------|
| 1      | 7.972         | BB   | 0.3180      | 1.23123e4    | 608.76038    | 97.3918 |
| 2      | 8.895         | BB   | 0.3363      | 329.73004    | 15.06691     | 2.6082  |

Totals : 1.26421e4 623.82729

7-phenyl-4,5,6,7-tetrahydropyrazolo[1,5-a]pyrimidine-3-carbonitrile (**6a**)

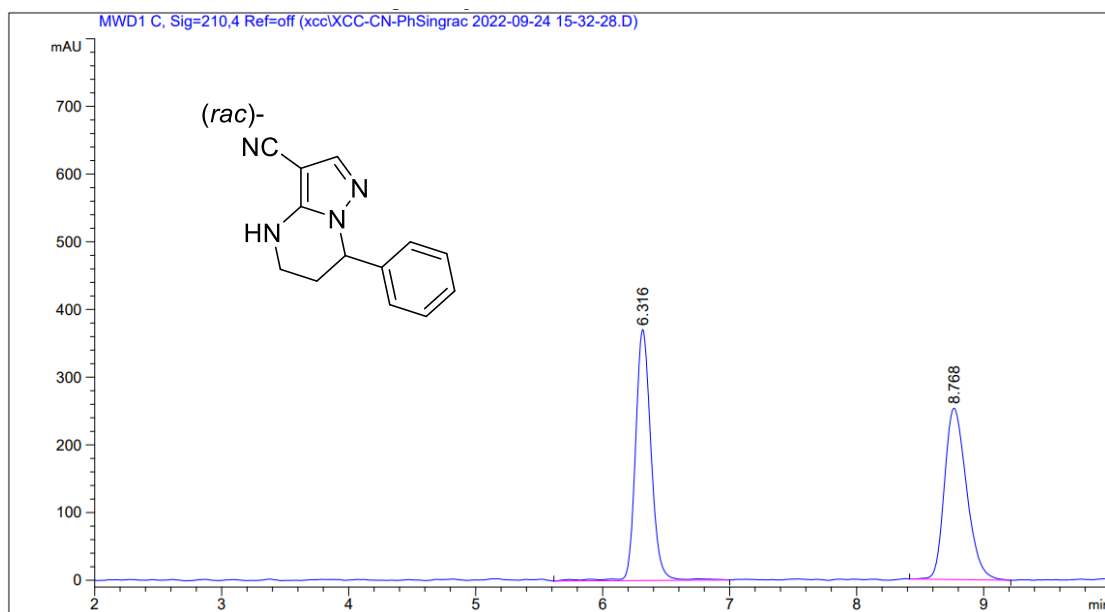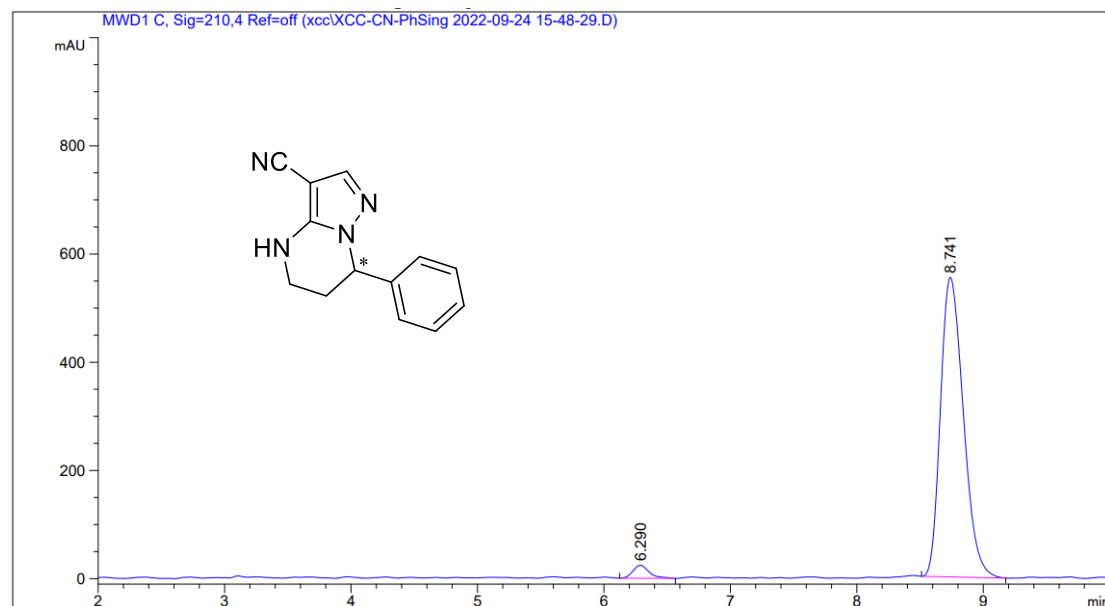

| Peak # | RetTime [min] | Type | Width [min] | Area [mAU*s] | Height [mAU] | Area %  |
|--------|---------------|------|-------------|--------------|--------------|---------|
| 1      | 6.290         | BB   | 0.1110      | 213.65065    | 23.97683     | 2.9838  |
| 2      | 8.741         | BB   | 0.1934      | 6946.65283   | 553.67578    | 97.0162 |

Totals : 7160.30348 577.65261

7-(2-methoxyphenyl)-4,5,6,7-tetrahydropyrazolo[1,5-a]pyrimidine-3-carbonitrile (**6b**)

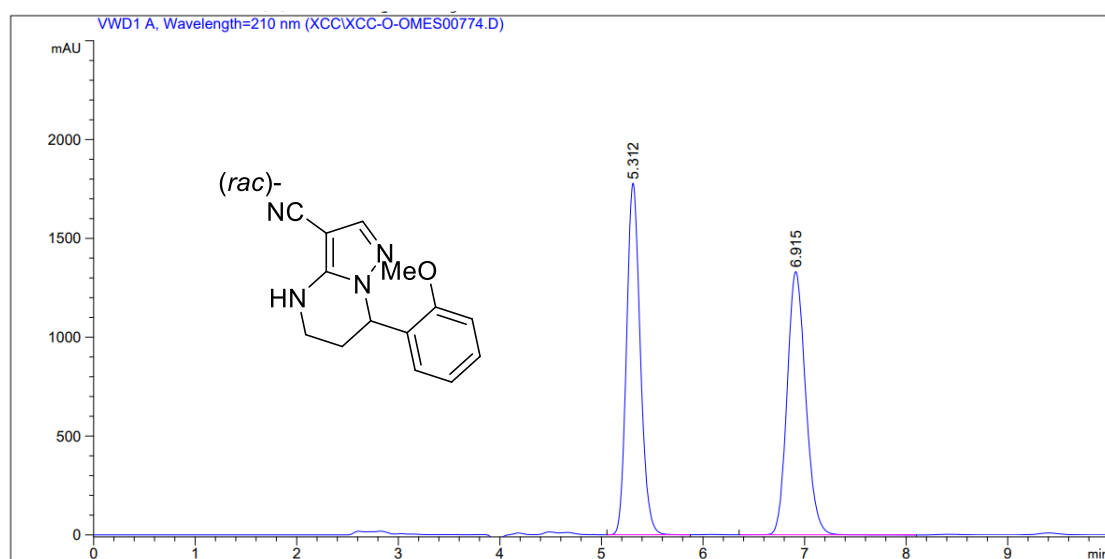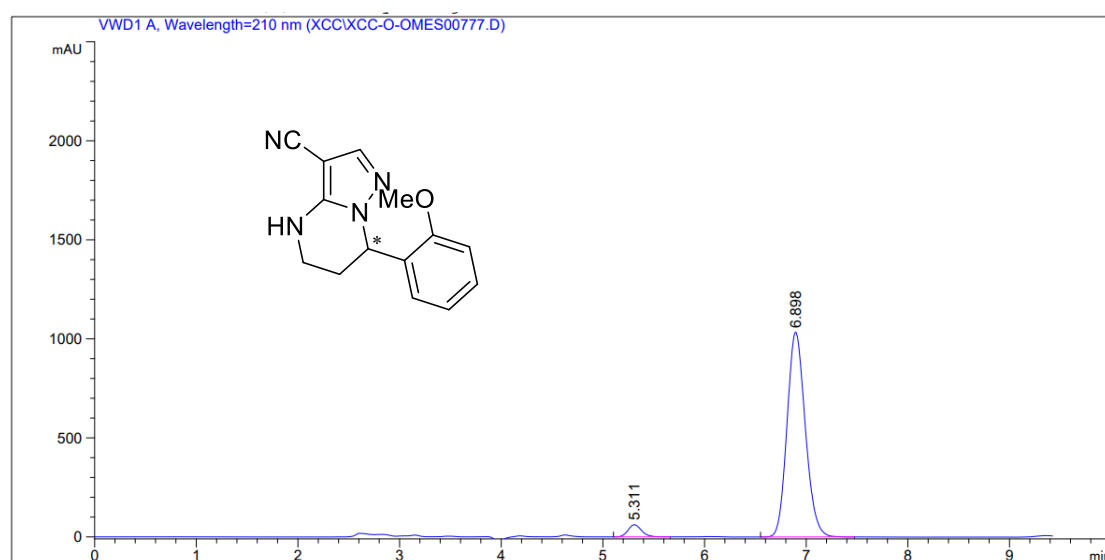

| Peak # | RetTime [min] | Type | Width [min] | Area [mAU*s] | Height [mAU] | Area %  |
|--------|---------------|------|-------------|--------------|--------------|---------|
| 1      | 5.311         | BB   | 0.1414      | 567.88715    | 61.67021     | 4.2105  |
| 2      | 6.898         | BB   | 0.1938      | 1.29195e4    | 1033.45605   | 95.7895 |

Totals : 1.34874e4 1095.12626



7-(*m*-tolyl)-4,5,6,7-tetrahydropyrazolo[1,5-*a*]pyrimidine-3-carbonitrile (**6c**)

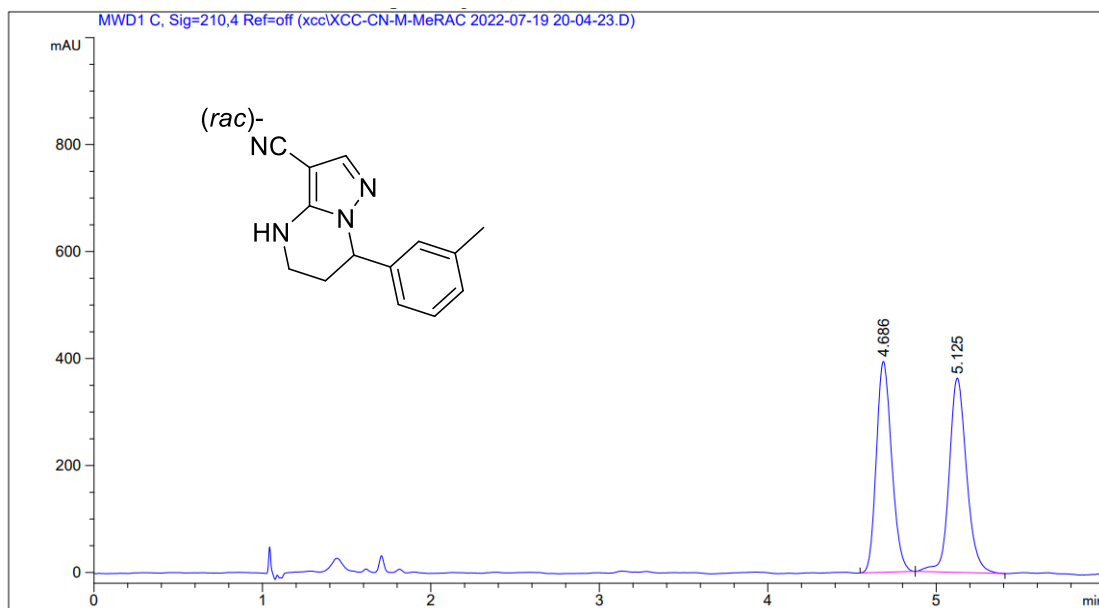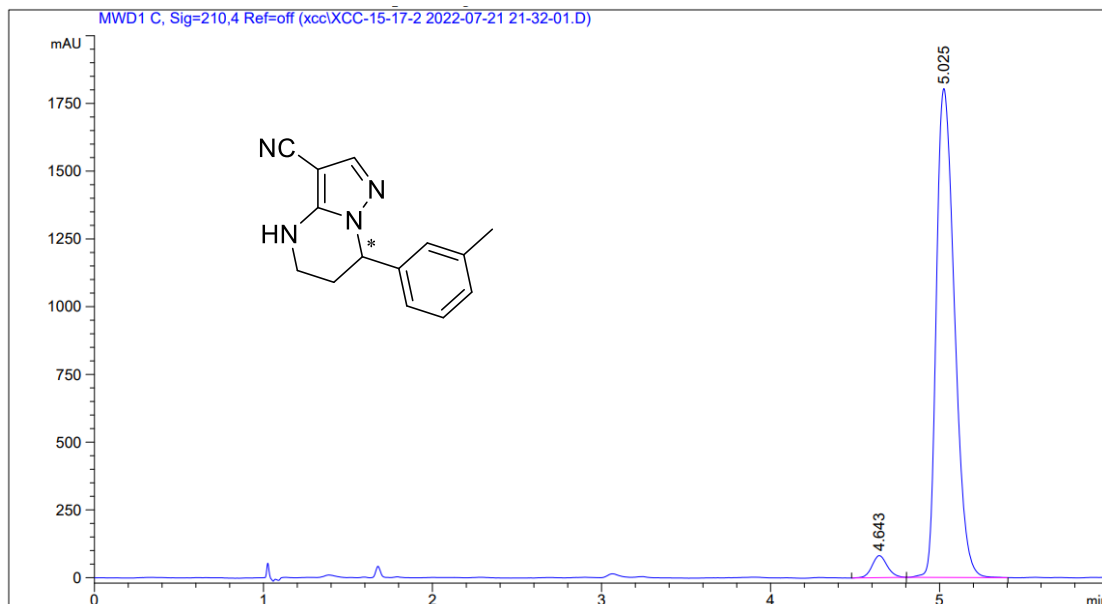

| Peak # | RetTime [min] | Type | Width [min] | Area [mAU*s] | Height [mAU] | Area %  |
|--------|---------------|------|-------------|--------------|--------------|---------|
| 1      | 4.643         | BB   | 0.0951      | 509.20541    | 81.24929     | 3.6508  |
| 2      | 5.025         | BB   | 0.1189      | 1.34385e4    | 1804.07251   | 96.3492 |

Totals : 1.39477e4 1885.32180

7-(3-methoxyphenyl)-4,5,6,7-tetrahydropyrazolo[1,5-a]pyrimidine-3-carbonitrile (**6d**)

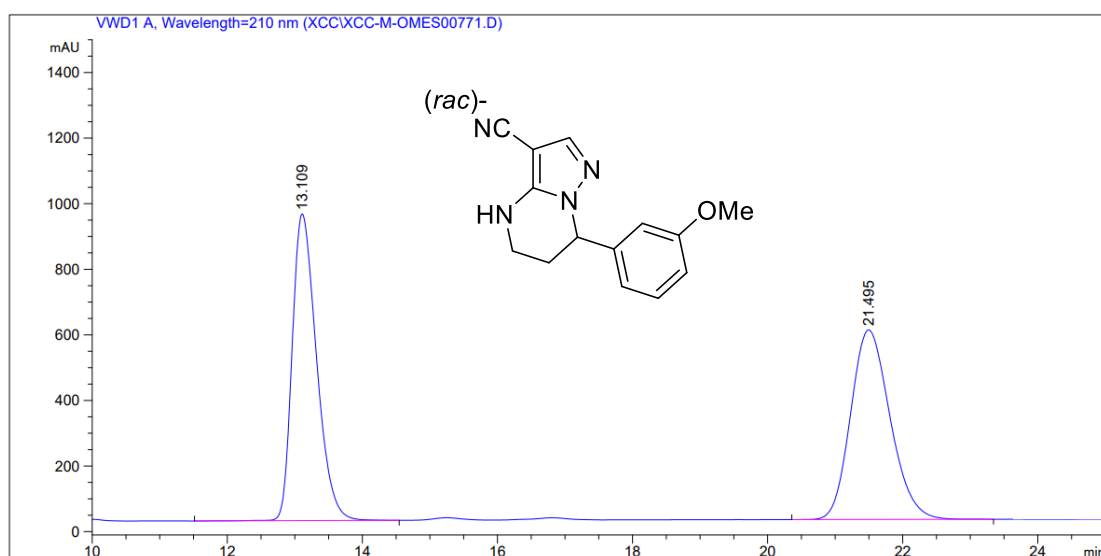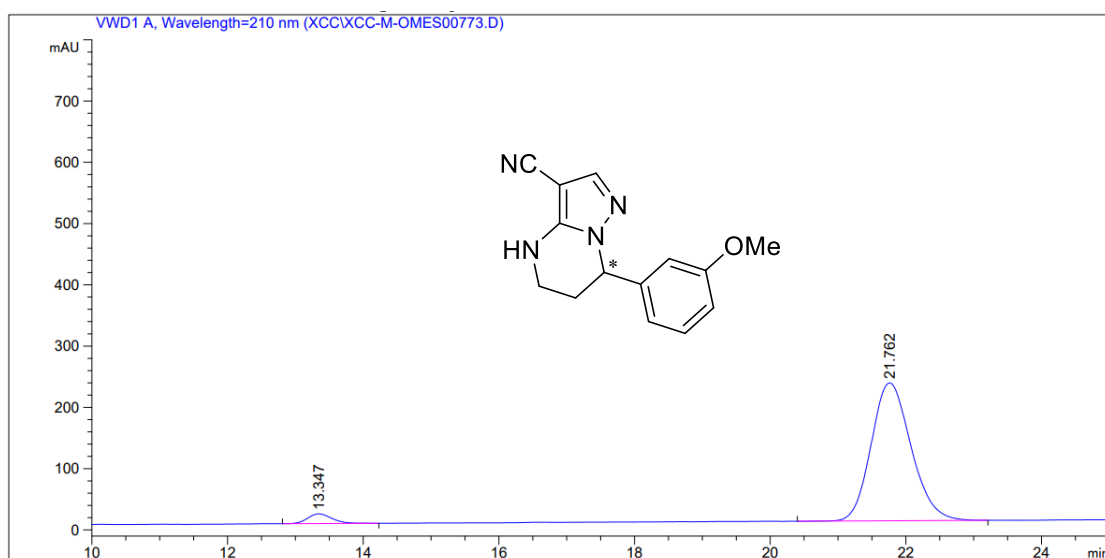

| Peak # | RetTime [min] | Type | Width [min] | Area [mAU*s] | Height [mAU] | Area %  |
|--------|---------------|------|-------------|--------------|--------------|---------|
| 1      | 13.347        | BB   | 0.3828      | 396.57285    | 15.90961     | 4.1336  |
| 2      | 21.762        | BB   | 0.6328      | 9197.22949   | 225.05836    | 95.8664 |

Totals : 9593.80234 240.96798

7-(*p*-tolyl)-4,5,6,7-tetrahydropyrazolo[1,5-*a*]pyrimidine-3-carbonitrile (**6e**)

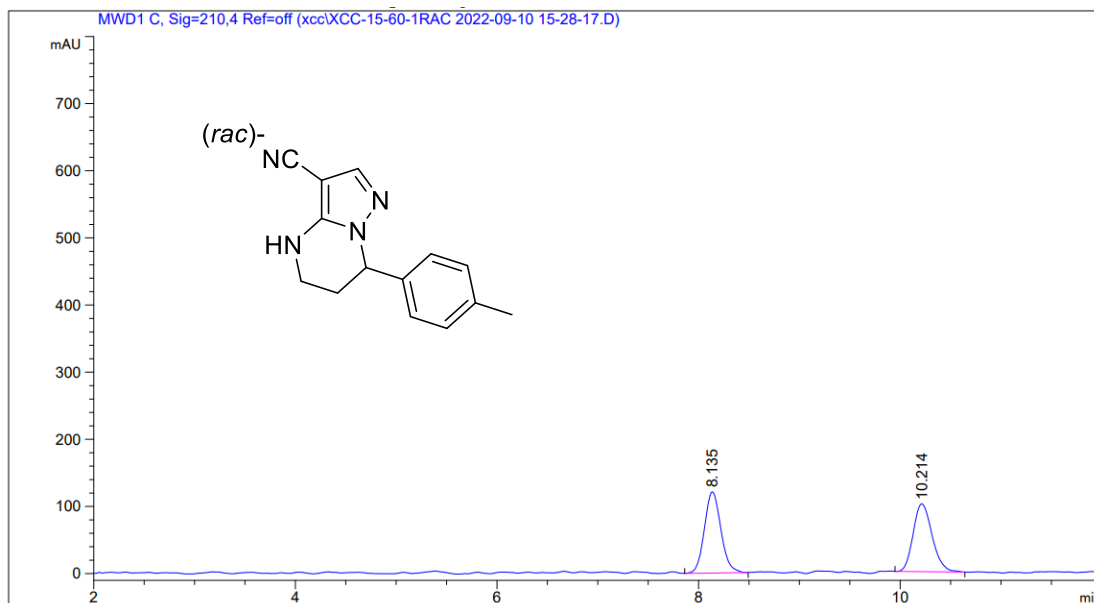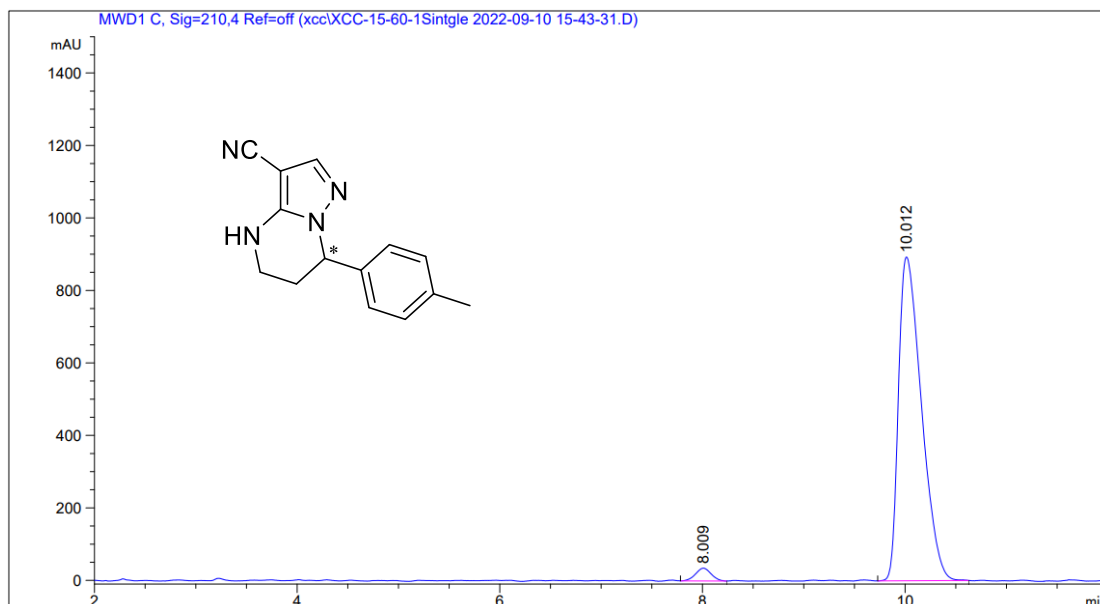

| Peak # | RetTime [min] | Type | Width [min] | Area [mAU*s] | Height [mAU] | Area %  |
|--------|---------------|------|-------------|--------------|--------------|---------|
| 1      | 8.009         | VB R | 0.1358      | 377.72217    | 35.46671     | 2.6266  |
| 2      | 10.012        | BV R | 0.2209      | 1.40030e4    | 892.98193    | 97.3734 |

Totals : 1.43807e4 928.44865

7-(4-(*tert*-butyl)phenyl)-4,5,6,7-tetrahydropyrazolo[1,5-*a*]pyrimidine-3-carbonitrile

(6f)

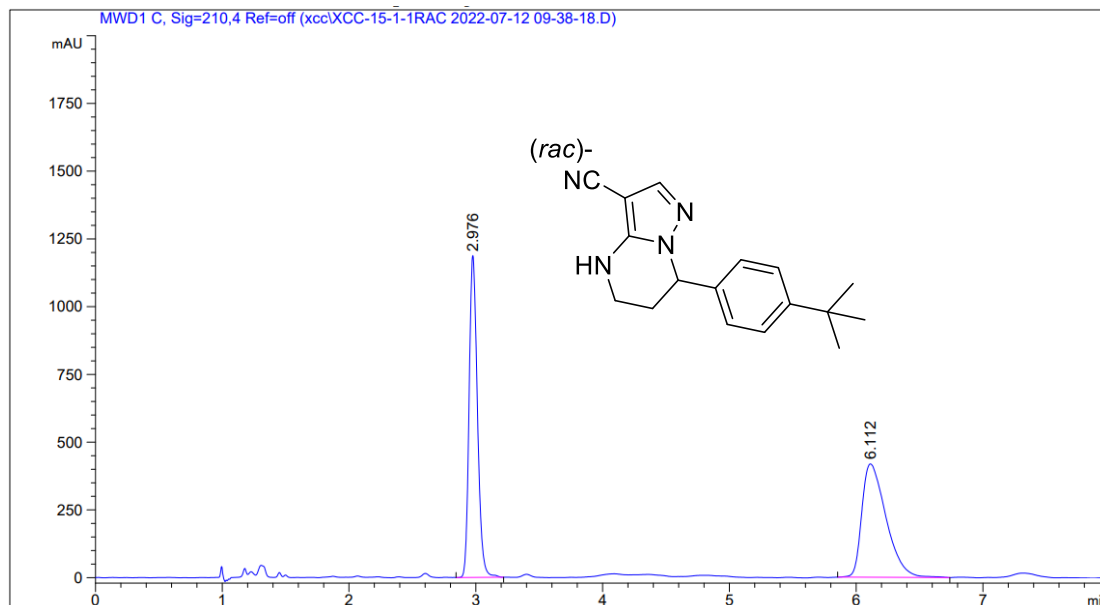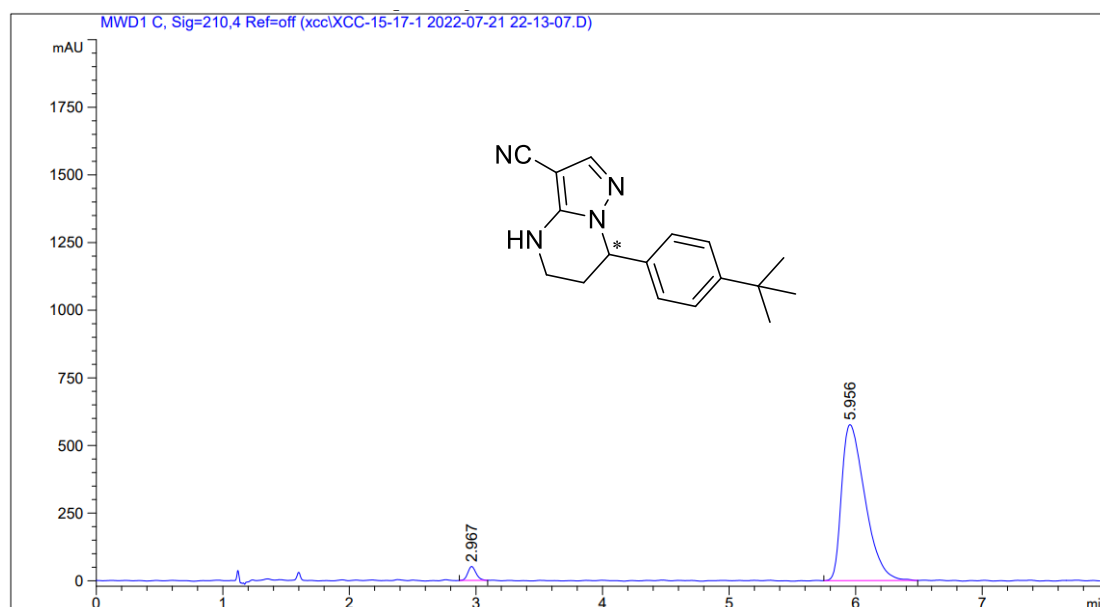

| Peak #   | RetTime [min] | Type | Width [min] | Area [mAU*s] | Height [mAU] | Area %  |
|----------|---------------|------|-------------|--------------|--------------|---------|
| 1        | 2.967         | BB   | 0.0701      | 232.44370    | 51.53968     | 3.0361  |
| 2        | 5.956         | BB   | 0.1917      | 7423.67529   | 576.49438    | 96.9639 |
| Totals : |               |      |             | 7656.11899   | 628.03406    |         |

7-(3-chlorophenyl)-4,5,6,7-tetrahydropyrazolo[1,5-a]pyrimidine-3-carbonitrile (**6g**)

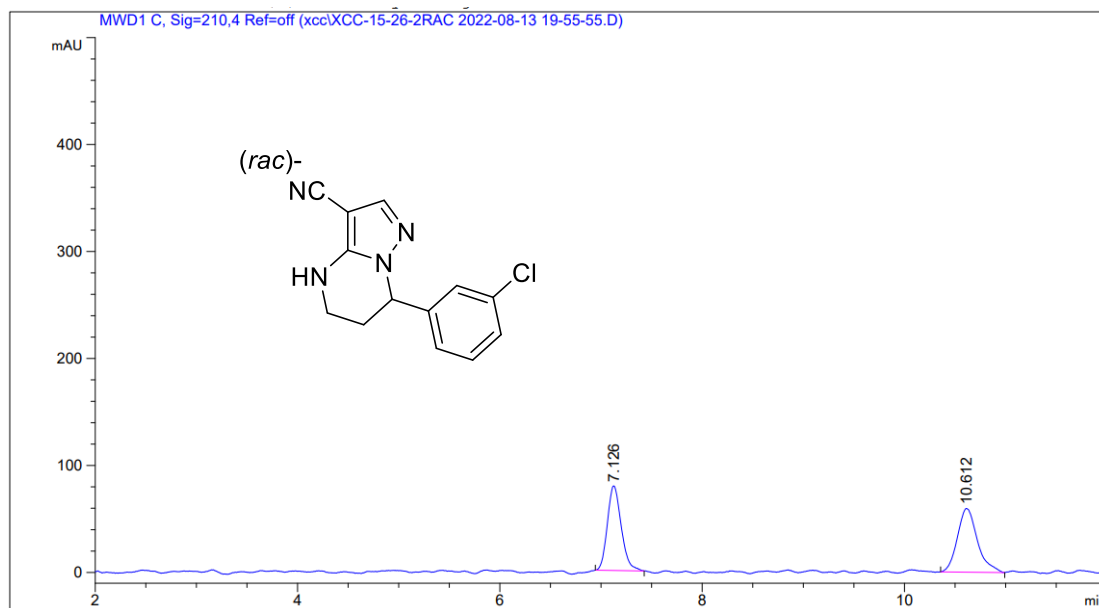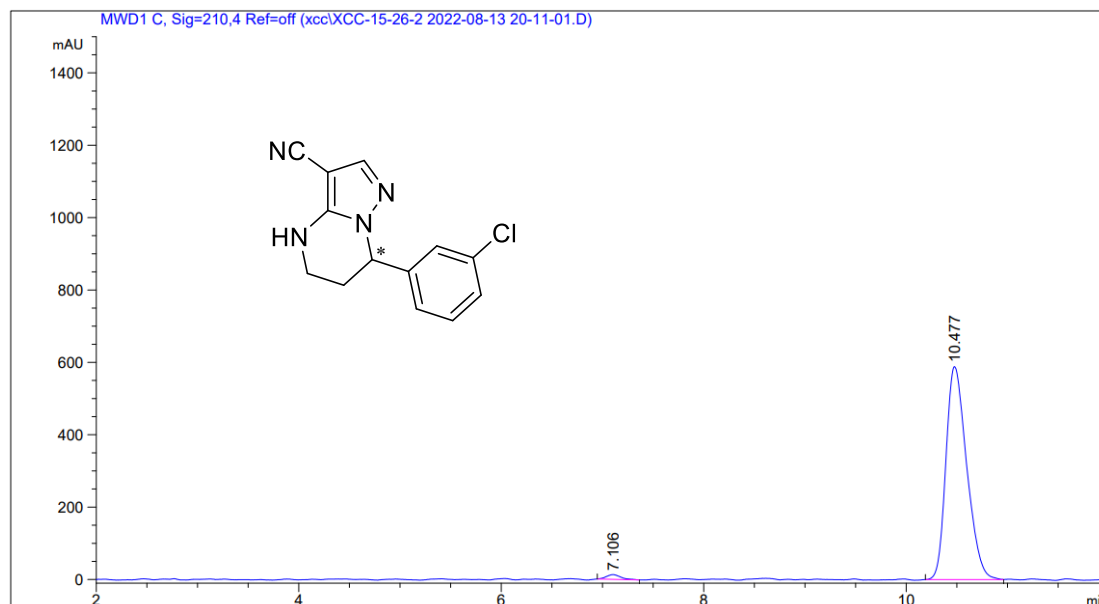

| Peak # | RetTime [min] | Type | Width [min] | Area [mAU*s] | Height [mAU] | Area %  |
|--------|---------------|------|-------------|--------------|--------------|---------|
| 1      | 7.106         | BB   | 0.1211      | 129.20503    | 13.09125     | 1.5178  |
| 2      | 10.477        | BB   | 0.1977      | 8383.29883   | 588.40875    | 98.4822 |

Totals : 8512.50386 601.50001

7-(3-fluorophenyl)-4,5,6,7-tetrahydropyrazolo[1,5-a]pyrimidine-3-carbonitrile (**6h**)

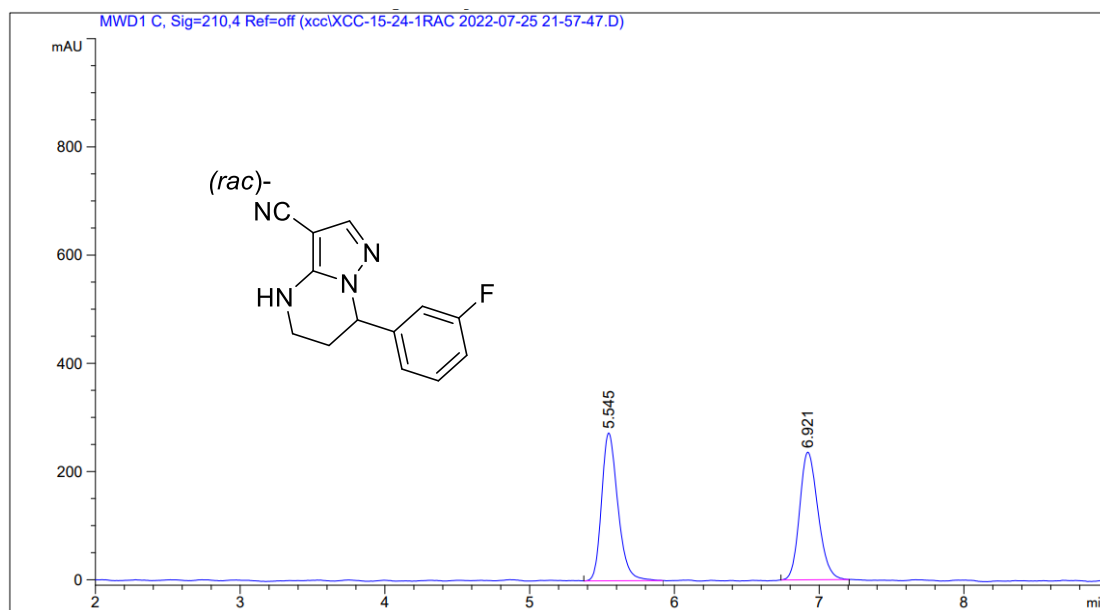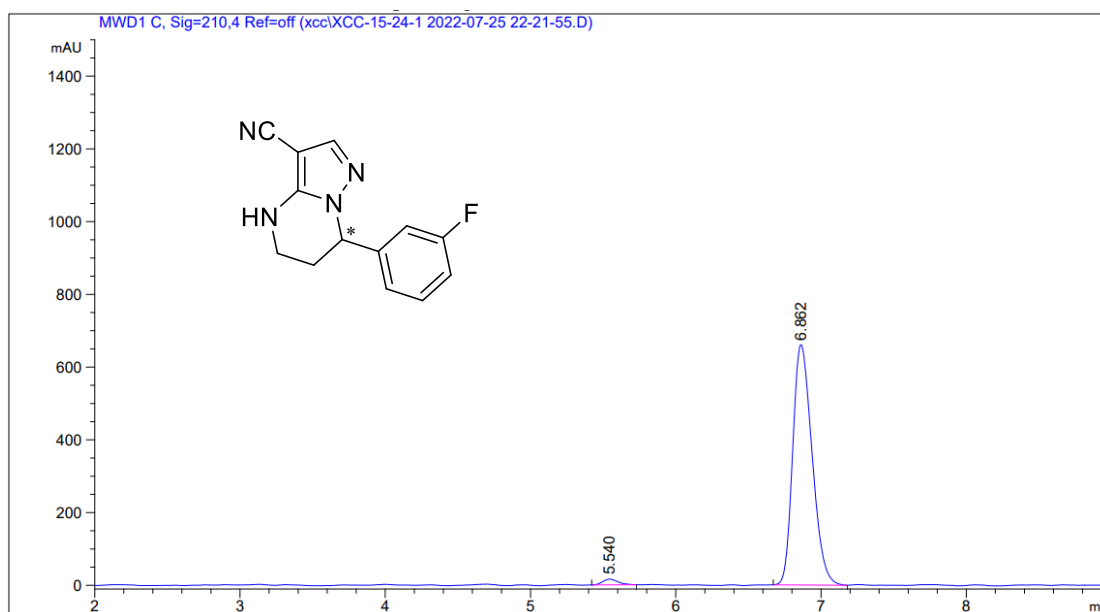

| Peak #   | RetTime [min] | Type | Width [min] | Area [mAU*s] | Height [mAU] | Area %  |
|----------|---------------|------|-------------|--------------|--------------|---------|
| 1        | 5.540         | BB   | 0.0963      | 114.30991    | 15.72785     | 1.8342  |
| 2        | 6.862         | BB   | 0.1446      | 6117.87354   | 660.44977    | 98.1658 |
| Totals : |               |      |             | 6232.18344   | 676.17761    |         |

7-(4-fluorophenyl)-4,5,6,7-tetrahydropyrazolo[1,5-*a*]pyrimidine-3-carbonitrile (**6i**)

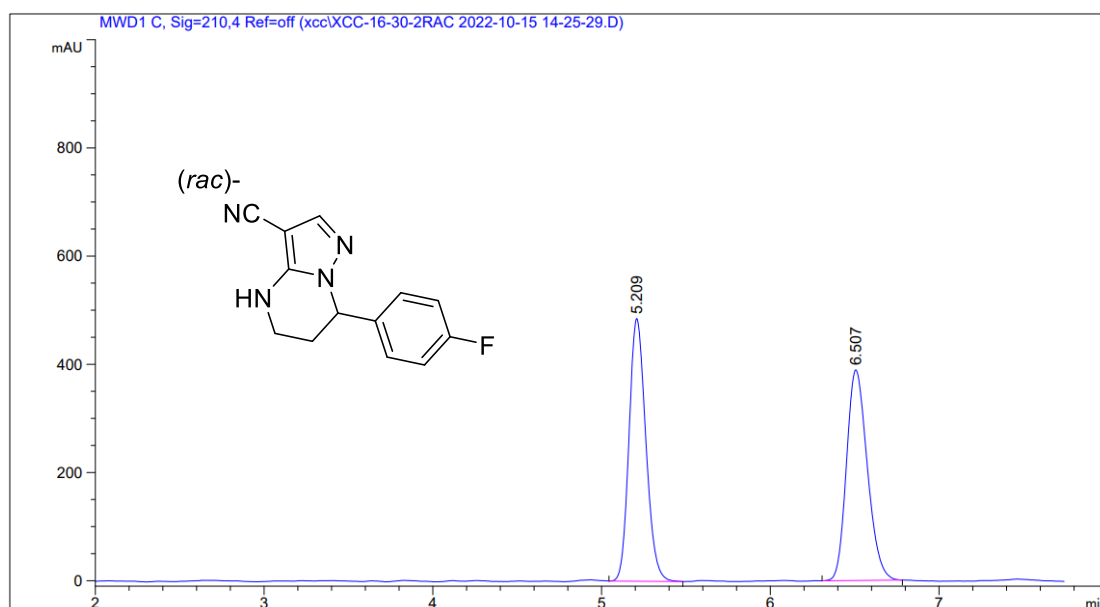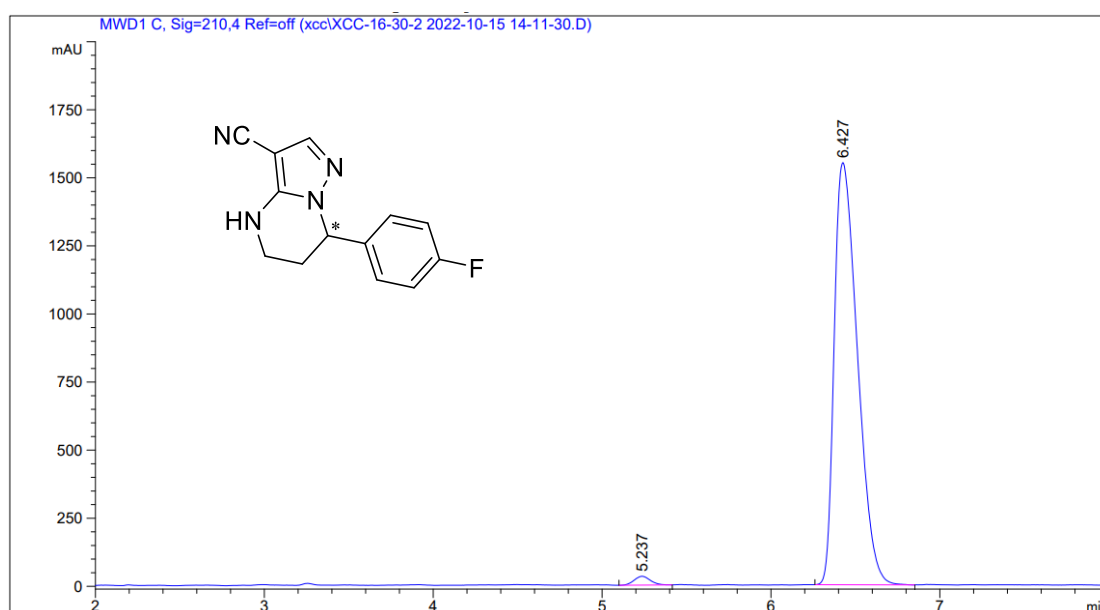

| Peak # | RetTime [min] | Type | Width [min] | Area [mAU*s] | Height [mAU] | Area %  |
|--------|---------------|------|-------------|--------------|--------------|---------|
| 1      | 5.237         | BB   | 0.0997      | 214.50722    | 32.40227     | 1.4319  |
| 2      | 6.427         | BB   | 0.1332      | 1.47662e4    | 1549.90491   | 98.5681 |

Totals : 1.49807e4 1582.30717

7-(4-bromophenyl)-4,5,6,7-tetrahydropyrazolo[1,5-a]pyrimidine-3-carbonitrile (**6j**)

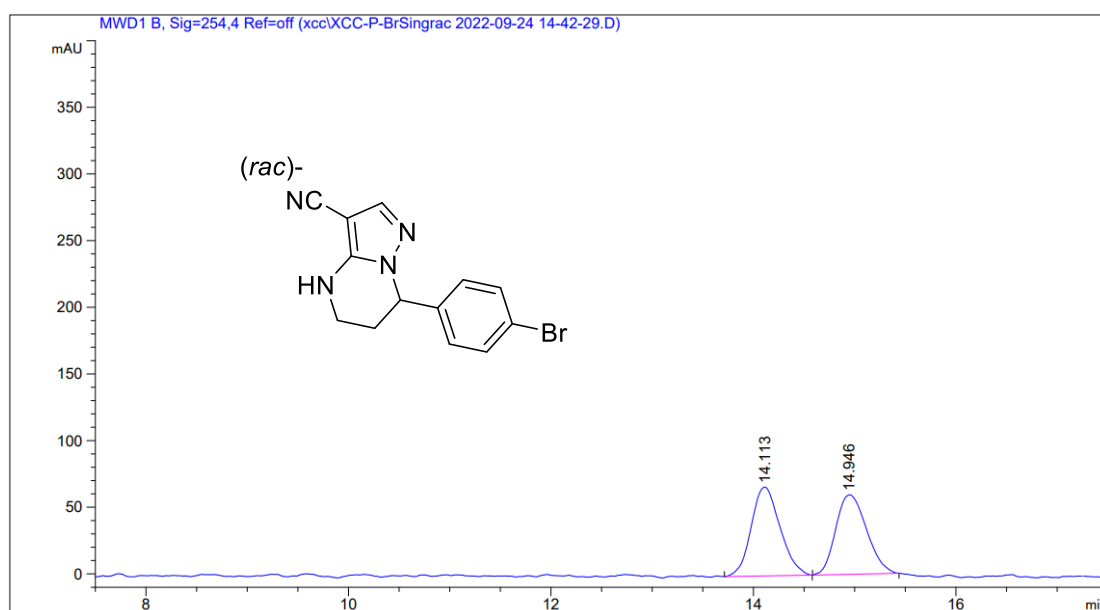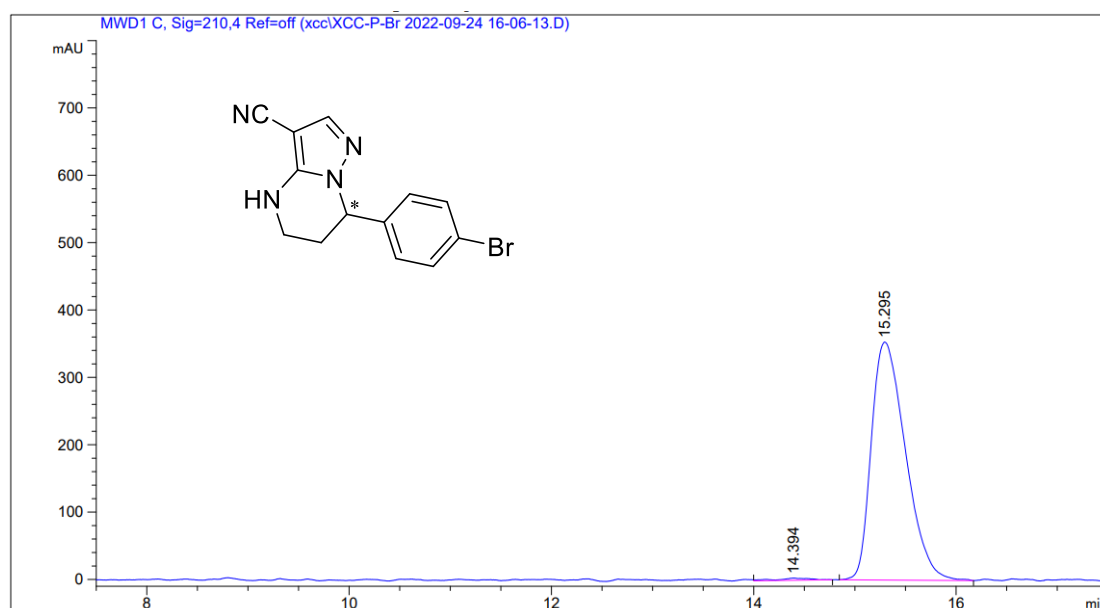

| Peak # | RetTime [min] | Type | Width [min] | Area [mAU*s] | Height [mAU] | Area %  |
|--------|---------------|------|-------------|--------------|--------------|---------|
| 1      | 14.394        | VB   | 0.2733      | 73.67776     | 3.28997      | 0.8806  |
| 2      | 15.295        | BB   | 0.3498      | 8293.36621   | 353.32397    | 99.1194 |

Totals : 8367.04398 356.61395



7-(pyridin-2-yl)-4,5,6,7-tetrahydropyrazolo[1,5-a]pyrimidine-3-carbonitrile (**6k**)

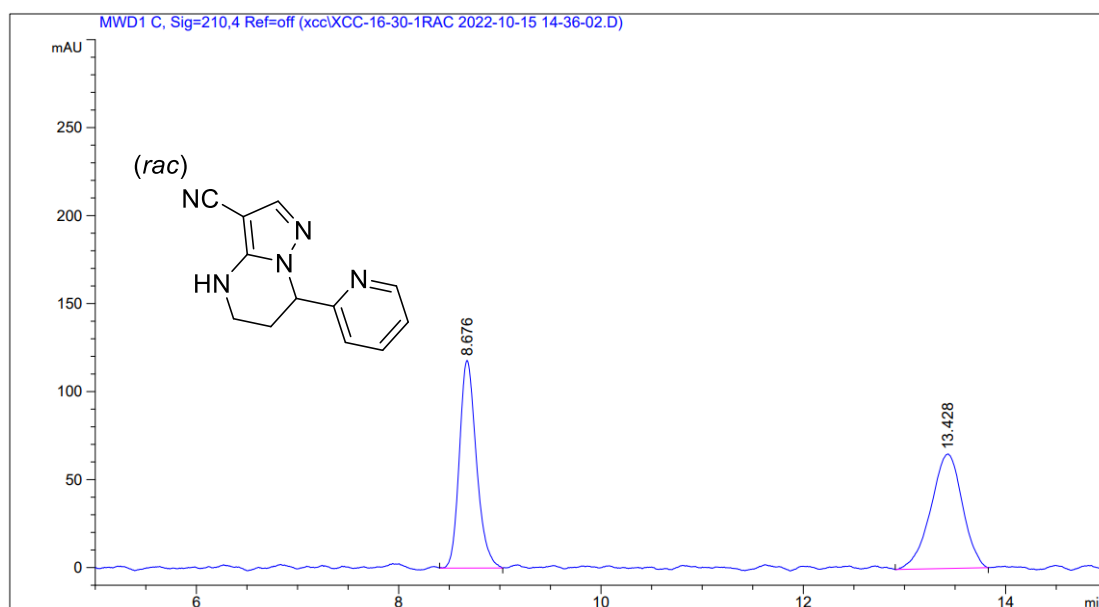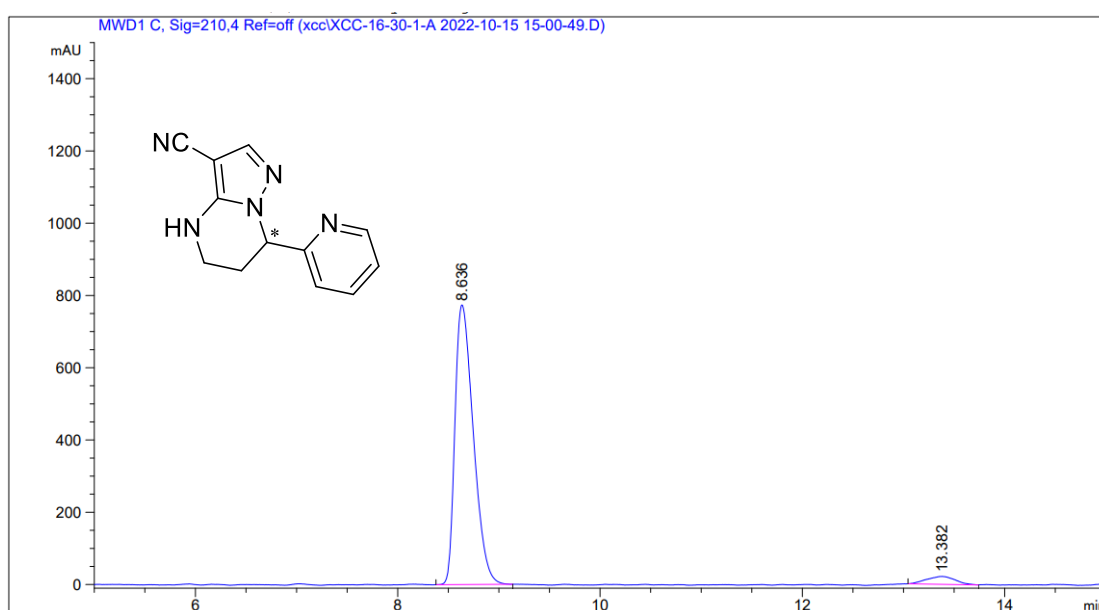

| Peak # | RetTime [min] | Type | Width [min] | Area [mAU*s] | Height [mAU] | Area %  |
|--------|---------------|------|-------------|--------------|--------------|---------|
| 1      | 8.636         | BB   | 0.1837      | 9765.12598   | 773.96906    | 95.7790 |
| 2      | 13.382        | BB   | 0.2307      | 430.34714    | 22.04581     | 4.2210  |

Totals : 1.01955e4 796.01487

2,7-diphenyl-4,5,6,7-tetrahydropyrazolo[1,5-a]pyrimidine-3-carbonitrile (**6l**)

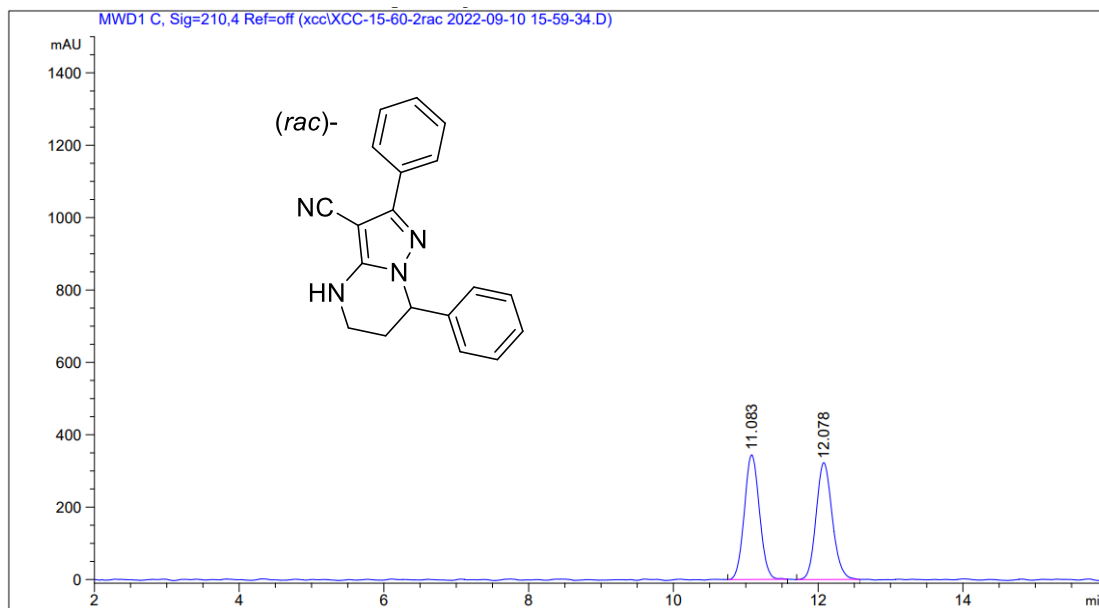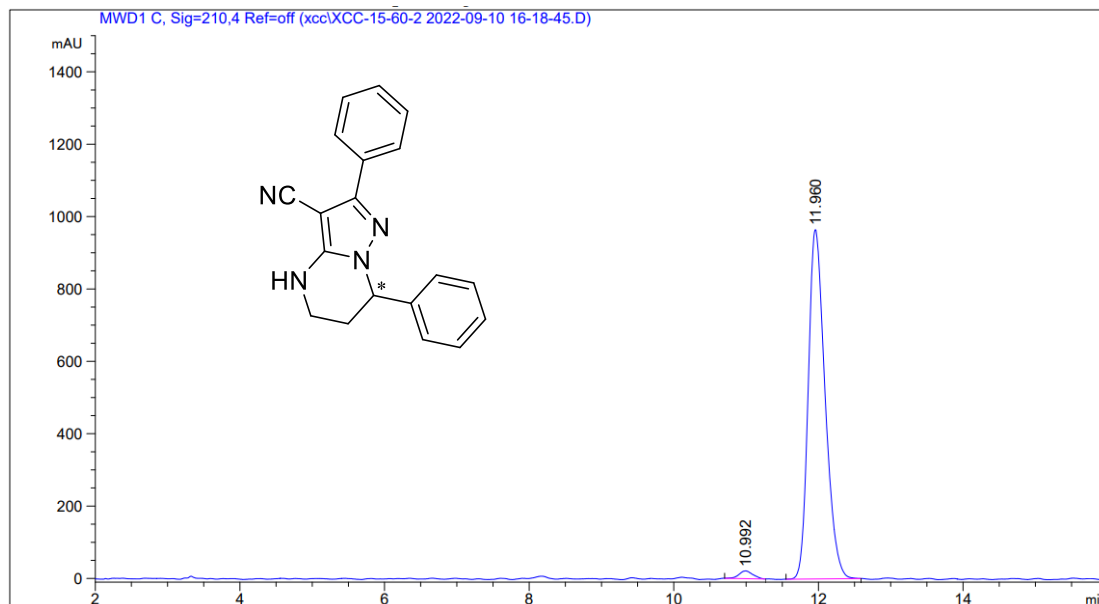

| Peak # | RetTime [min] | Type | Width [min] | Area [mAU*s] | Height [mAU] | Area %  |
|--------|---------------|------|-------------|--------------|--------------|---------|
| 1      | 10.992        | VB R | 0.1617      | 283.91626    | 21.40568     | 1.7897  |
| 2      | 11.960        | VV R | 0.2199      | 1.55799e4    | 965.02570    | 98.2103 |

Totals : 1.58639e4 986.43137

7-phenyl-4,5,6,7-tetrahydropyrazolo[1,5-a]pyrimidine (**6m**)

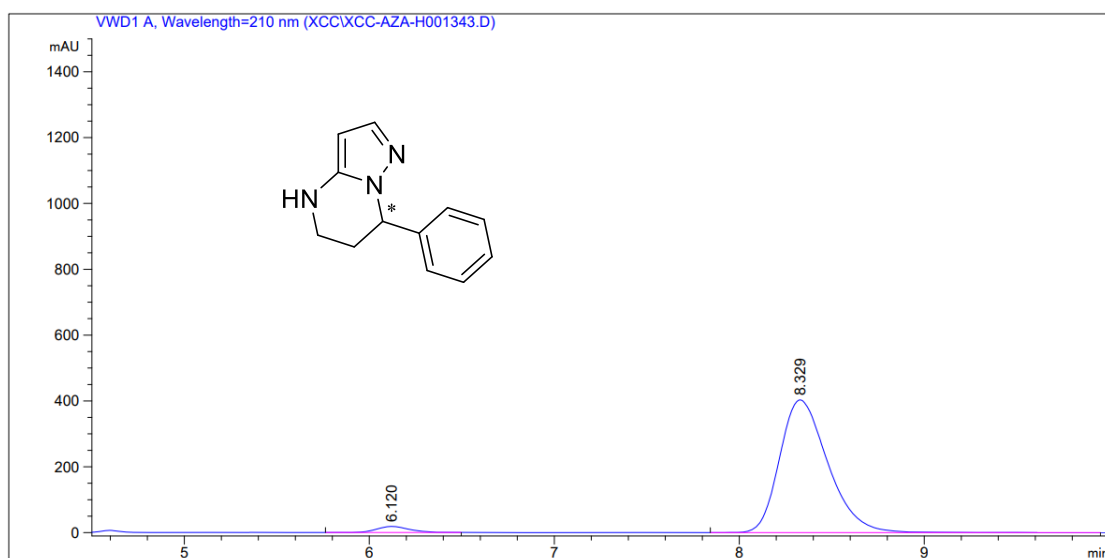

| Peak # | RetTime [min] | Type | Width [min] | Area [mAU*s] | Height [mAU] | Area %  |
|--------|---------------|------|-------------|--------------|--------------|---------|
| 1      | 6.120         | BB   | 0.1873      | 225.23874    | 18.46704     | 2.9917  |
| 2      | 8.329         | BB   | 0.2794      | 7303.46729   | 402.98465    | 97.0083 |

Totals : 7528.70602 421.45169

## 9. X-ray crystallographic analysis of compound 4c.

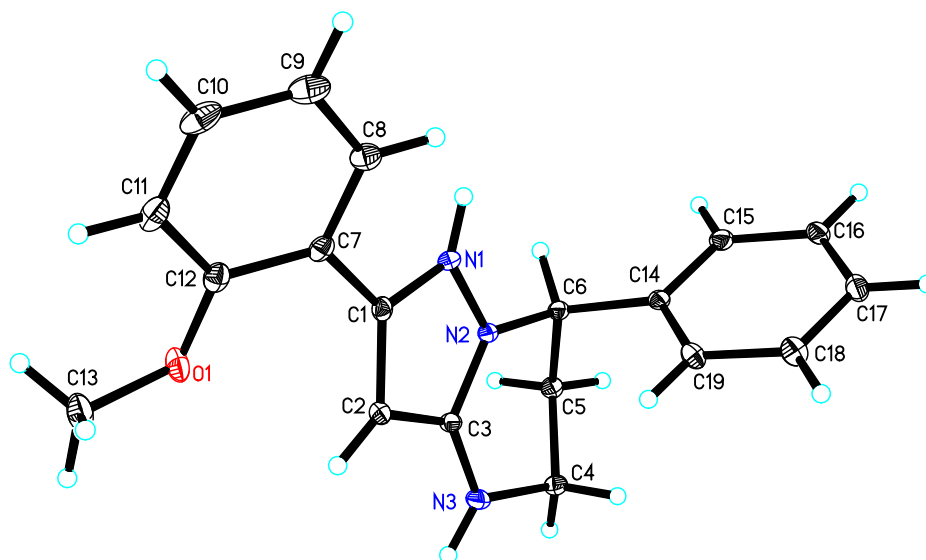

**Table S1. Crystal Data and Experimental Parameters for Compound 4c**

| Compound                                                   | 4c                                               |
|------------------------------------------------------------|--------------------------------------------------|
| Formula                                                    | C <sub>19</sub> H <sub>20</sub> N <sub>3</sub> O |
| Fw                                                         | 306.38                                           |
| crystal system                                             | Orthorhombic                                     |
| space group                                                | P2(1)2(1)2(1)                                    |
| <i>a</i> (Å)                                               | 6.3426(10)                                       |
| <i>b</i> (Å)                                               | 12.1336(2)                                       |
| <i>c</i> (Å)                                               | 20.3228(2)                                       |
| $\alpha$ (deg)                                             | 90                                               |
| $\beta$ (deg)                                              | 90                                               |
| $\gamma$ (deg)                                             | 90                                               |
| <i>V</i> (Å <sup>3</sup> )                                 | 1564.01(4)                                       |
| <i>Z</i>                                                   | 4                                                |
| <i>D</i> <sub>calc</sub> (g/cm <sup>3</sup> )              | 1.301                                            |
| $\mu$ (Mo/K $\alpha$ ) <sub>calc</sub> (cm <sup>-1</sup> ) | 0.651                                            |
| size (mm)                                                  | 0.15 x 0.15 x 0.15                               |
| <i>F</i> (000)                                             | 652                                              |

|                                       |                 |
|---------------------------------------|-----------------|
| Theta range for data collection (deg) | 4.244 to 75.988 |
| no. of reflns, collected              | 8762            |
| no of obsd reflns                     | 3124            |
| no of variables                       | 209             |
| abscorr ( $T_{\max}$ , $T_{\min}$ )   | 1.00, 0.58      |
| R                                     | 0.034           |
| $R_w$                                 | 0.089           |
| $R_{\text{all}}$                      | 0.035           |
| Absolute structure parameter          | -0.06(11)       |
| Gof                                   | 1.08            |
| CCDC                                  | 2243486         |

---

## 10. DFT calculations.

All calculations were carried out using Gaussian 09 program package.<sup>17</sup> The B3LYP<sup>18</sup> functional of density functional theory (DFT) was employed combined with mixed basis set where effective core potential SDD and its corresponding basis set<sup>19</sup> was used to treat Rh atom, and all-electron basis set 6-31G\*<sup>20</sup> used for other non-metal atoms including H, C, N, O, P, and Cl. In order to more accurately simulate the experimental conditions, all stationary points were fully optimized in THF solvent using the polarizable continuum model (PCM).<sup>21</sup> Vibrational frequency analysis was followed to confirm each stationary point a minimum (no imaginary frequency) or a transition state (only imaginary frequency) and to abstract zero-point energy corrections and corresponding thermochemistry values. The vector of the imaginary mode of each transition state indicated that it connected the two expected adjacent minima on the reaction profile as evidenced by the geometry-optimized structures on either side of the transition state. Solutional entropy was corrected with Fang's THERMO program<sup>22</sup> at the temperature of 363.15 K.

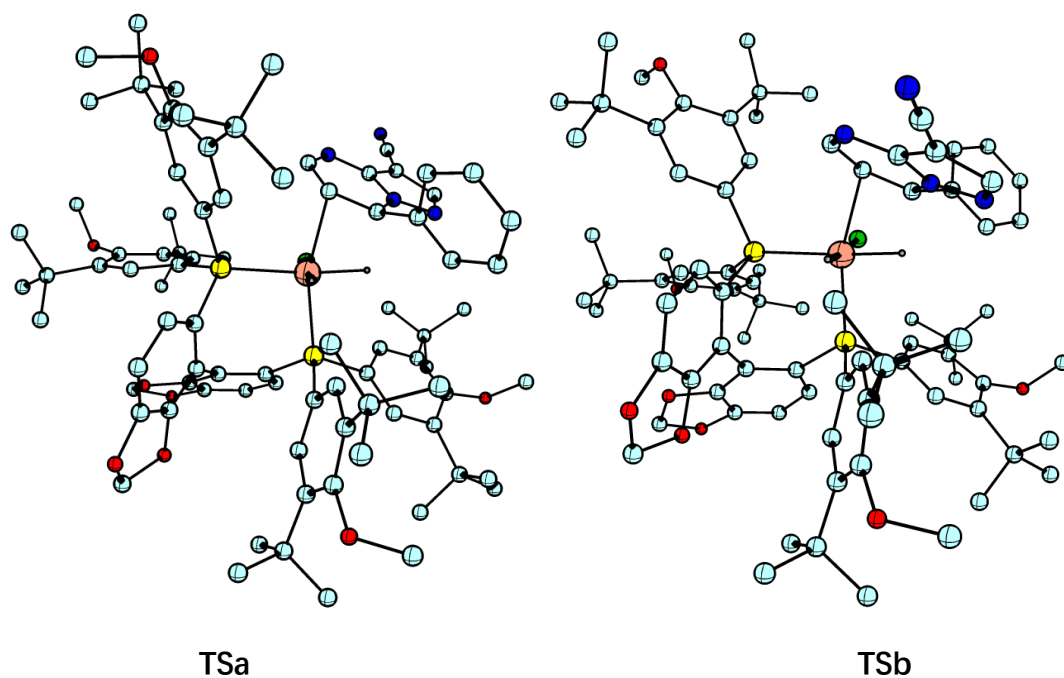

**Figure S1. Optimized schematic structures of TSa and TSb**

**Table S2** The electronic energies (ZPE included), Gibbs free energies, enthalpies (in au), and entropies (in  $\text{cal}\cdot\text{mol}^{-1}\cdot\text{K}^{-1}$ ), and corresponding relative values (in kcal/mol in the parathesis) for Cpdb + 1a, obtained at the B3LYP-PCM(solvent=furan)/SDDU6-31G\* level.

|                    | <b>E</b>               | <b>G<sup>a</sup></b>   | <b>H</b>               | <b>S<sup>a</sup></b> |
|--------------------|------------------------|------------------------|------------------------|----------------------|
| <b>Cpdb</b>        | -4964.84660            | -4965.02721            | -4964.74582            | 562.1                |
| <b>1a</b>          | -718.98124             | -719.01985             | -718.96806             | 99.4                 |
| <b>THF</b>         | -229.94864             | -229.96807             | -229.94398             | 44.7                 |
| <b>Cpdb+1a-THF</b> | -5453.87920<br>(0.0)   | -5454.07899            | -5453.76990            | 616.8                |
| <b>TSa</b>         | -5453.85736<br>(13.70) | -5454.04982<br>(18.30) | -5453.74859<br>(13.37) | 603.1                |
| <b>TSb</b>         | -5453.84947<br>(18.66) | -5454.04618<br>(20.59) | -5453.74003<br>(18.74) | 611.7                |

<sup>a</sup>The values were corrected at 363.15 K.

**Table S3** The optimized Cartesian Coordinates (in Å) and structures (the hydrogen atoms except for the H atom directly involved in the reaction omitted for clarity) of stationary points for Cpdb + 1a, obtained with B3LYP-PCM(solvent=furan)/SDDU6-31G\* method.

| Species     | Cartesian Coordinates |           |           | structures |  |
|-------------|-----------------------|-----------|-----------|------------|--|
| <b>Cpdb</b> | 6                     | -0.685383 | -2.330216 | 1.626601   |  |
|             | 6                     | -0.122860 | -1.091541 | 1.351442   |  |
|             | 6                     | 0.992851  | -1.108262 | 0.456029   |  |
|             | 6                     | 1.410979  | -2.313751 | -0.119330  |  |
|             | 6                     | 0.788326  | -3.547038 | 0.148882   |  |
|             | 6                     | -0.255975 | -3.522198 | 1.045267   |  |
|             | 1                     | 2.268194  | -2.316481 | -0.780644  |  |
|             | 1                     | 1.132885  | -4.468778 | -0.306936  |  |
|             | 6                     | -0.638255 | 0.089879  | 2.116783   |  |
|             | 6                     | -1.355022 | 1.223327  | 1.603556   |  |
|             | 6                     | -0.489091 | 0.060035  | 3.496941   |  |
|             | 6                     | -1.846503 | 2.198919  | 2.481038   |  |
|             | 6                     | -0.973126 | 1.049983  | 4.351858   |  |
|             | 6                     | -1.670335 | 2.136498  | 3.873374   |  |
|             | 1                     | -2.385917 | 3.047557  | 2.080466   |  |
|             | 1                     | -2.062923 | 2.903665  | 4.531106   |  |
|             | 8                     | -1.732590 | -2.599703 | 2.477921   |  |
|             | 8                     | -1.026412 | -4.563781 | 1.504104   |  |
|             | 8                     | -0.669448 | 0.739378  | 5.648409   |  |
|             | 8                     | 0.119202  | -0.919166 | 4.241894   |  |
|             | 6                     | -1.725616 | -4.024354 | 2.633297   |  |
|             | 6                     | 0.163157  | -0.430268 | 5.588129   |  |
|             | 1                     | 1.192864  | -0.156343 | 5.845169   |  |
|             | 1                     | -0.230992 | -1.191056 | 6.265450   |  |
|             | 1                     | -2.750039 | -4.394787 | 2.639646   |  |
|             | 1                     | -1.190327 | -4.286768 | 3.555666   |  |
|             | 15                    | 1.906211  | 0.482046  | 0.164518   |  |
|             | 15                    | -1.545354 | 1.538876  | -0.207779  |  |
|             | 6                     | 3.353883  | 0.037568  | -0.902572  |  |
|             | 6                     | 4.652645  | 0.375174  | -0.522808  |  |
|             | 6                     | 3.162175  | -0.496616 | -2.187448  |  |
|             | 6                     | 5.773812  | 0.121665  | -1.333172  |  |
|             | 1                     | 4.805038  | 0.862547  | 0.431203   |  |
|             | 6                     | 4.233547  | -0.848943 | -3.014470  |  |
|             | 1                     | 2.149603  | -0.653133 | -2.534987  |  |
|             | 6                     | 5.545210  | -0.616260 | -2.514930  |  |
|             | 6                     | 2.699846  | 0.703633  | 1.826529   |  |
|             | 6                     | 2.623069  | 1.913936  | 2.523401   |  |
|             | 6                     | 3.345336  | -0.380140 | 2.427140   |  |
|             | 6                     | 3.260257  | 2.087270  | 3.762339   |  |
| 1           | 2.062508              | 2.726357  | 2.078230  |            |  |
| 6           | 3.988663              | -0.287856 | 3.669322  |            |  |

|   |           |           |           |
|---|-----------|-----------|-----------|
| 1 | 3.341263  | -1.332687 | 1.911019  |
| 6 | 4.027351  | 1.000197  | 4.261188  |
| 6 | -2.808521 | 2.893058  | -0.367302 |
| 6 | -4.149530 | 2.592781  | -0.607896 |
| 6 | -2.436842 | 4.241875  | -0.239643 |
| 6 | -5.124577 | 3.584142  | -0.815371 |
| 1 | -4.455972 | 1.557347  | -0.651441 |
| 6 | -3.355402 | 5.278966  | -0.440081 |
| 1 | -1.406592 | 4.472920  | 0.001373  |
| 6 | -4.669377 | 4.919637  | -0.848468 |
| 6 | -2.450104 | 0.080802  | -0.885135 |
| 6 | -2.324805 | -0.270250 | -2.226259 |
| 6 | -3.378581 | -0.613924 | -0.093931 |
| 6 | -3.124858 | -1.255530 | -2.830399 |
| 1 | -1.575779 | 0.236589  | -2.820338 |
| 6 | -4.248683 | -1.566131 | -0.637878 |
| 1 | -3.435238 | -0.385068 | 0.961914  |
| 6 | -4.157869 | -1.806353 | -2.037918 |
| 1 | -0.462869 | 2.894929  | -2.134215 |
| 6 | -2.760174 | -1.654679 | -4.289349 |
| 6 | -3.139973 | -0.511517 | -5.261189 |
| 1 | -4.220001 | -0.328574 | -5.273532 |
| 1 | -2.832125 | -0.766539 | -6.282639 |
| 1 | -2.647031 | 0.427554  | -4.985785 |
| 6 | -3.380446 | -2.979191 | -4.793756 |
| 1 | -4.453278 | -2.919825 | -4.975860 |
| 1 | -3.199004 | -3.802110 | -4.095805 |
| 1 | -2.904847 | -3.236735 | -5.747531 |
| 6 | -1.223579 | -1.870006 | -4.365987 |
| 1 | -0.903422 | -2.651088 | -3.667027 |
| 1 | -0.651536 | -0.965588 | -4.145478 |
| 1 | -0.950074 | -2.187417 | -5.378590 |
| 6 | -5.195779 | -2.381007 | 0.283870  |
| 6 | -5.072055 | -1.939586 | 1.759121  |
| 1 | -5.395862 | -0.901697 | 1.903401  |
| 1 | -4.052959 | -2.039585 | 2.141563  |
| 1 | -5.723271 | -2.571896 | 2.372934  |
| 6 | -4.793503 | -3.874864 | 0.196750  |
| 1 | -4.924283 | -4.259968 | -0.817384 |
| 1 | -5.416638 | -4.472410 | 0.874061  |
| 1 | -3.745129 | -4.016180 | 0.482569  |
| 6 | -6.691306 | -2.238890 | -0.089924 |
| 1 | -7.303705 | -2.703256 | 0.692424  |
| 1 | -6.930957 | -2.733937 | -1.030305 |



|   |           |           |           |
|---|-----------|-----------|-----------|
| 1 | -6.988233 | -1.185834 | -0.158149 |
| 6 | 4.546728  | -1.607167 | 4.279632  |
| 6 | 3.059222  | 3.397529  | 4.570363  |
| 6 | 4.366758  | 4.214543  | 4.704453  |
| 1 | 4.828782  | 4.386599  | 3.725065  |
| 1 | 5.094082  | 3.724269  | 5.352558  |
| 1 | 4.142937  | 5.194875  | 5.142828  |
| 6 | 2.018633  | 4.318802  | 3.897937  |
| 1 | 1.049885  | 3.822668  | 3.776174  |
| 1 | 2.339029  | 4.671363  | 2.912888  |
| 1 | 1.864764  | 5.199092  | 4.532681  |
| 6 | 2.515627  | 3.061469  | 5.982331  |
| 1 | 1.547776  | 2.550053  | 5.916107  |
| 1 | 2.362879  | 3.988188  | 6.550049  |
| 1 | 3.207639  | 2.428371  | 6.540815  |
| 6 | 5.836440  | -2.036368 | 3.540227  |
| 1 | 6.196562  | -2.996223 | 3.931317  |
| 1 | 6.641739  | -1.304169 | 3.661783  |
| 1 | 5.655735  | -2.157150 | 2.466303  |
| 6 | 4.823317  | -1.553475 | 5.800218  |
| 1 | 5.675227  | -0.928915 | 6.066796  |
| 1 | 5.040312  | -2.570106 | 6.149192  |
| 1 | 3.952007  | -1.188404 | 6.353863  |
| 6 | 3.490834  | -2.732154 | 4.089089  |
| 1 | 3.319806  | -2.985909 | 3.039342  |
| 1 | 2.526763  | -2.448253 | 4.524178  |
| 1 | 3.837648  | -3.644334 | 4.588034  |
| 6 | 3.978904  | -1.391807 | -4.445418 |
| 6 | 4.487108  | -2.842636 | -4.623979 |
| 1 | 4.087914  | -3.502590 | -3.844329 |
| 1 | 5.575467  | -2.899428 | -4.605755 |
| 1 | 4.152327  | -3.232620 | -5.593208 |
| 6 | 2.474187  | -1.401264 | -4.788558 |
| 1 | 2.027786  | -0.404218 | -4.710521 |
| 1 | 1.905321  | -2.085285 | -4.148805 |
| 1 | 2.347759  | -1.738922 | -5.823085 |
| 6 | 4.676257  | -0.469337 | -5.476494 |
| 1 | 4.487465  | -0.837631 | -6.492818 |
| 1 | 5.755914  | -0.437698 | -5.317665 |
| 1 | 4.284201  | 0.551946  | -5.408273 |
| 6 | 7.127964  | 0.726682  | -0.864078 |
| 6 | 6.890755  | 2.223012  | -0.515162 |
| 1 | 6.189347  | 2.363652  | 0.311942  |
| 1 | 6.502097  | 2.767741  | -1.382925 |

|   |           |           |           |
|---|-----------|-----------|-----------|
| 1 | 7.839593  | 2.685447  | -0.219300 |
| 6 | 8.257877  | 0.724892  | -1.919578 |
| 1 | 7.929470  | 1.164853  | -2.865723 |
| 1 | 8.657103  | -0.268095 | -2.127949 |
| 1 | 9.086029  | 1.332294  | -1.535110 |
| 6 | 7.627821  | 0.001146  | 0.407574  |
| 1 | 7.833706  | -1.057838 | 0.215303  |
| 1 | 6.891978  | 0.055269  | 1.217133  |
| 1 | 8.556468  | 0.462651  | 0.765678  |
| 8 | 6.611873  | -1.108855 | -3.249677 |
| 8 | -5.100478 | -2.643804 | -2.606577 |
| 8 | -5.514813 | 5.934940  | -1.262810 |
| 8 | 4.801799  | 1.226967  | 5.388138  |
| 6 | 6.194979  | 1.413801  | 5.118451  |
| 1 | 6.671489  | 0.487152  | 4.782781  |
| 1 | 6.650785  | 1.729751  | 6.059883  |
| 1 | 6.352099  | 2.187451  | 4.359089  |
| 6 | -5.635493 | 6.040900  | -2.686220 |
| 1 | -6.262972 | 6.914674  | -2.876865 |
| 1 | -6.109603 | 5.153880  | -3.119327 |
| 1 | -4.656572 | 6.182839  | -3.156570 |
| 6 | -2.960692 | 6.751369  | -0.151244 |
| 6 | -1.558039 | 6.843028  | 0.484671  |
| 1 | -0.766372 | 6.501493  | -0.188615 |
| 1 | -1.486738 | 6.256485  | 1.407077  |
| 1 | -1.352881 | 7.889271  | 0.739395  |
| 6 | -3.959152 | 7.356464  | 0.868192  |
| 1 | -4.980231 | 7.358401  | 0.482178  |
| 1 | -3.674171 | 8.391266  | 1.095647  |
| 1 | -3.942987 | 6.791491  | 1.808105  |
| 6 | -2.935378 | 7.624180  | -1.428834 |
| 1 | -2.504396 | 8.604714  | -1.191866 |
| 1 | -3.934324 | 7.794314  | -1.832272 |
| 1 | -2.313521 | 7.167257  | -2.207642 |
| 6 | -6.597739 | 3.103092  | -0.946830 |
| 6 | -6.899458 | 2.133932  | 0.229229  |
| 1 | -6.767359 | 2.637585  | 1.193773  |
| 1 | -6.264375 | 1.243896  | 0.224610  |
| 1 | -7.939412 | 1.793039  | 0.165536  |
| 6 | -7.672692 | 4.210273  | -0.848413 |
| 1 | -7.696808 | 4.871947  | -1.714321 |
| 1 | -7.539079 | 4.825476  | 0.046216  |
| 1 | -8.655370 | 3.727740  | -0.781506 |
| 6 | -6.787444 | 2.337875  | -2.278366 |

|           |    |           |           |           |  |
|-----------|----|-----------|-----------|-----------|--|
|           | 1  | -7.812318 | 1.953045  | -2.350829 |  |
|           | 1  | -6.101952 | 1.486734  | -2.354786 |  |
|           | 1  | -6.610755 | 2.985341  | -3.144482 |  |
|           | 6  | -6.132774 | -1.963635 | -3.331141 |  |
|           | 1  | -6.820130 | -2.736134 | -3.683289 |  |
|           | 1  | -5.732149 | -1.417261 | -4.190133 |  |
|           | 1  | -6.671543 | -1.261696 | -2.685988 |  |
|           | 6  | 7.198563  | -2.293497 | -2.700510 |  |
|           | 1  | 7.987540  | -2.595365 | -3.393392 |  |
|           | 1  | 6.460358  | -3.098717 | -2.614592 |  |
|           | 1  | 7.635278  | -2.110300 | -1.713539 |  |
|           | 1  | 0.184937  | 0.893384  | -2.099753 |  |
|           | 45 | 0.443504  | 2.082641  | -1.127331 |  |
|           | 17 | 1.095907  | 4.199084  | 0.176051  |  |
|           | 6  | 3.930446  | 3.901448  | -3.491851 |  |
|           | 6  | 3.131464  | 3.357472  | -4.557863 |  |
|           | 6  | 2.112124  | 2.679951  | -3.968964 |  |
|           | 8  | 2.225808  | 2.765186  | -2.602236 |  |
|           | 6  | 3.341473  | 3.517674  | -2.329808 |  |
|           | 1  | 4.824088  | 4.502447  | -3.586622 |  |
|           | 1  | 3.297412  | 3.464836  | -5.620819 |  |
|           | 1  | 1.266143  | 2.118942  | -4.329765 |  |
|           | 1  | 3.530520  | 3.694101  | -1.284617 |  |
| <b>1a</b> | 7  | 2.935248  | 4.580871  | 13.079918 |  |
|           | 7  | 3.490553  | 4.644028  | 11.836380 |  |
|           | 7  | 4.741609  | 3.273907  | 10.295617 |  |
|           | 6  | 3.239806  | 3.364292  | 13.522430 |  |
|           | 6  | 3.986441  | 2.607301  | 12.593487 |  |
|           | 6  | 4.142815  | 3.456650  | 11.481604 |  |
|           | 6  | 4.675799  | 4.293835  | 9.454135  |  |
|           | 1  | 5.159966  | 4.160592  | 8.489674  |  |
|           | 6  | 4.034990  | 5.517277  | 9.746686  |  |
|           | 1  | 4.049131  | 6.322638  | 9.023702  |  |
|           | 6  | 3.421094  | 5.713142  | 10.971592 |  |
|           | 6  | 2.738623  | 6.965904  | 11.348821 |  |
|           | 6  | 2.010409  | 7.658083  | 10.363925 |  |
|           | 1  | 1.903634  | 7.230095  | 9.371977  |  |
|           | 6  | 1.397466  | 8.873485  | 10.661297 |  |
|           | 1  | 0.827312  | 9.389447  | 9.894470  |  |
|           | 6  | 1.511873  | 9.419945  | 11.941874 |  |
|           | 1  | 1.035366  | 10.368077 | 12.174135 |  |
|           | 6  | 2.237161  | 8.741204  | 12.924704 |  |
|           | 1  | 2.332192  | 9.163621  | 13.920736 |  |
|           | 6  | 2.842474  | 7.519114  | 12.637982 |  |

|            |    |           |           |           |  |
|------------|----|-----------|-----------|-----------|--|
|            | 1  | 3.398094  | 6.996738  | 13.406290 |  |
|            | 6  | 4.471690  | 1.287884  | 12.724298 |  |
|            | 7  | 4.868477  | 0.198380  | 12.841897 |  |
|            | 1  | 2.910100  | 3.055856  | 14.505645 |  |
| <b>THF</b> | 6  | -1.030696 | 0.000213  | -3.672337 |  |
|            | 6  | -1.030696 | -1.029312 | -2.669649 |  |
|            | 6  | -1.030696 | -0.387897 | -1.468672 |  |
|            | 8  | -1.030696 | 0.965795  | -1.651076 |  |
|            | 6  | -1.030696 | 1.183832  | -2.999470 |  |
|            | 1  | -1.030696 | -0.129948 | -4.745781 |  |
|            | 1  | -1.030696 | -2.098945 | -2.828101 |  |
|            | 1  | -1.030696 | -0.722431 | -0.442289 |  |
|            | 1  | -1.030696 | 2.218693  | -3.306785 |  |
| <b>TSa</b> | 6  | -0.755767 | -2.198962 | 1.701679  |  |
|            | 6  | -0.219899 | -0.960352 | 1.377674  |  |
|            | 6  | 0.819136  | -0.983051 | 0.393229  |  |
|            | 6  | 1.184980  | -2.189136 | -0.215401 |  |
|            | 6  | 0.588070  | -3.421868 | 0.107987  |  |
|            | 6  | -0.373607 | -3.393888 | 1.092574  |  |
|            | 1  | 1.988110  | -2.196611 | -0.941010 |  |
|            | 1  | 0.892769  | -4.344522 | -0.373360 |  |
|            | 6  | -0.708291 | 0.225406  | 2.153171  |  |
|            | 6  | -1.463448 | 1.335436  | 1.644806  |  |
|            | 6  | -0.522007 | 0.216074  | 3.529066  |  |
|            | 6  | -1.963502 | 2.305756  | 2.520419  |  |
|            | 6  | -1.008869 | 1.206346  | 4.382458  |  |
|            | 6  | -1.751136 | 2.264555  | 3.908979  |  |
|            | 1  | -2.532984 | 3.135554  | 2.122083  |  |
|            | 1  | -2.148482 | 3.028407  | 4.567819  |  |
|            | 8  | -1.736171 | -2.464548 | 2.629187  |  |
|            | 8  | -1.101641 | -4.432866 | 1.616788  |  |
|            | 8  | -0.664643 | 0.920511  | 5.675723  |  |
|            | 8  | 0.125360  | -0.739062 | 4.271705  |  |
|            | 6  | -1.713891 | -3.887297 | 2.793980  |  |
|            | 6  | 0.192313  | -0.229695 | 5.609676  |  |
|            | 1  | 1.222238  | 0.069953  | 5.835180  |  |
|            | 1  | -0.165947 | -0.990056 | 6.307269  |  |
|            | 1  | -2.733519 | -4.260166 | 2.881368  |  |
|            | 1  | -1.107332 | -4.143126 | 3.672810  |  |
|            | 15 | 1.762722  | 0.579721  | 0.066064  |  |
|            | 15 | -1.646127 | 1.618662  | -0.171914 |  |
|            | 6  | 3.200604  | 0.098737  | -1.009712 |  |
|            | 6  | 4.503825  | 0.395466  | -0.608868 |  |
|            | 6  | 3.012419  | -0.418313 | -2.303136 |  |

|   |           |           |           |
|---|-----------|-----------|-----------|
| 6 | 5.630359  | 0.121563  | -1.406019 |
| 1 | 4.657148  | 0.866240  | 0.352647  |
| 6 | 4.087456  | -0.782660 | -3.122205 |
| 1 | 2.000955  | -0.545974 | -2.668429 |
| 6 | 5.398544  | -0.593534 | -2.600963 |
| 6 | 2.593454  | 0.778755  | 1.716018  |
| 6 | 2.671803  | 1.994601  | 2.402399  |
| 6 | 3.158686  | -0.360429 | 2.297310  |
| 6 | 3.375293  | 2.105974  | 3.612933  |
| 1 | 2.169624  | 2.855483  | 1.981542  |
| 6 | 3.862090  | -0.328959 | 3.508864  |
| 1 | 3.044231  | -1.310148 | 1.790701  |
| 6 | 4.047162  | 0.949779  | 4.093060  |
| 6 | -2.960943 | 2.920356  | -0.380779 |
| 6 | -4.256834 | 2.576003  | -0.768104 |
| 6 | -2.675064 | 4.277197  | -0.149844 |
| 6 | -5.257646 | 3.533236  | -1.013581 |
| 1 | -4.508580 | 1.532306  | -0.890911 |
| 6 | -3.622511 | 5.281420  | -0.376892 |
| 1 | -1.686508 | 4.543394  | 0.199925  |
| 6 | -4.873461 | 4.888141  | -0.926508 |
| 6 | -2.509586 | 0.112709  | -0.809020 |
| 6 | -2.348040 | -0.304700 | -2.127793 |
| 6 | -3.437784 | -0.563162 | -0.001127 |
| 6 | -3.115882 | -1.339437 | -2.694571 |
| 1 | -1.596536 | 0.186585  | -2.733033 |
| 6 | -4.271810 | -1.566100 | -0.507959 |
| 1 | -3.522284 | -0.278004 | 1.039102  |
| 6 | -4.149962 | -1.874072 | -1.891985 |
| 1 | -0.421660 | 3.204949  | -2.084745 |
| 6 | -2.727217 | -1.815020 | -4.123958 |
| 6 | -3.183587 | -0.776246 | -5.176202 |
| 1 | -4.272666 | -0.662523 | -5.195468 |
| 1 | -2.862652 | -1.088733 | -6.177604 |
| 1 | -2.748180 | 0.208992  | -4.978082 |
| 6 | -3.258189 | -3.214295 | -4.517998 |
| 1 | -4.332827 | -3.243054 | -4.694736 |
| 1 | -3.019658 | -3.962878 | -3.755974 |
| 1 | -2.767410 | -3.516253 | -5.450767 |
| 6 | -1.181048 | -1.930162 | -4.202998 |
| 1 | -0.798468 | -2.616620 | -3.438913 |
| 1 | -0.673657 | -0.970398 | -4.082160 |
| 1 | -0.895381 | -2.321962 | -5.185553 |
| 6 | -5.213549 | -2.359548 | 0.438001  |

|   |           |           |           |
|---|-----------|-----------|-----------|
| 6 | -5.107158 | -1.857742 | 1.895059  |
| 1 | -5.448133 | -0.820414 | 1.996675  |
| 1 | -4.088546 | -1.926057 | 2.286615  |
| 1 | -5.751856 | -2.475859 | 2.529830  |
| 6 | -4.790738 | -3.850293 | 0.415807  |
| 1 | -4.913628 | -4.281270 | -0.580458 |
| 1 | -5.408321 | -4.425407 | 1.117133  |
| 1 | -3.741730 | -3.966849 | 0.709517  |
| 6 | -6.707651 | -2.255300 | 0.046687  |
| 1 | -7.319546 | -2.702034 | 0.839658  |
| 1 | -6.931051 | -2.787203 | -0.877440 |
| 1 | -7.021323 | -1.210814 | -0.061778 |
| 6 | 4.328437  | -1.693534 | 4.097138  |
| 6 | 3.334594  | 3.431015  | 4.420916  |
| 6 | 4.726701  | 4.094849  | 4.549320  |
| 1 | 5.201048  | 4.212029  | 3.567698  |
| 1 | 5.397080  | 3.529340  | 5.197015  |
| 1 | 4.614951  | 5.095675  | 4.984251  |
| 6 | 2.405240  | 4.467988  | 3.756366  |
| 1 | 1.385768  | 4.089924  | 3.632295  |
| 1 | 2.765394  | 4.783179  | 2.772057  |
| 1 | 2.357368  | 5.358470  | 4.393472  |
| 6 | 2.763004  | 3.151594  | 5.834528  |
| 1 | 1.744078  | 2.750764  | 5.769772  |
| 1 | 2.715819  | 4.086448  | 6.407201  |
| 1 | 3.382698  | 2.442643  | 6.387377  |
| 6 | 5.581243  | -2.202494 | 3.344538  |
| 1 | 5.875835  | -3.188684 | 3.724608  |
| 1 | 6.436675  | -1.530057 | 3.464633  |
| 1 | 5.383021  | -2.300753 | 2.271257  |
| 6 | 4.613672  | -1.673584 | 5.617289  |
| 1 | 5.505592  | -1.109903 | 5.887228  |
| 1 | 4.761764  | -2.705480 | 5.957081  |
| 1 | 3.770370  | -1.255321 | 6.177094  |
| 6 | 3.201778  | -2.746168 | 3.900306  |
| 1 | 3.018362  | -2.986936 | 2.849297  |
| 1 | 2.257405  | -2.402644 | 4.334101  |
| 1 | 3.490754  | -3.680284 | 4.395268  |
| 6 | 3.844093  | -1.287764 | -4.568854 |
| 6 | 4.337833  | -2.739989 | -4.776998 |
| 1 | 3.923637  | -3.412959 | -4.016734 |
| 1 | 5.424967  | -2.809958 | -4.751215 |
| 1 | 4.006654  | -3.102643 | -5.757747 |
| 6 | 2.345285  | -1.272132 | -4.932941 |

|   |           |           |           |
|---|-----------|-----------|-----------|
| 1 | 1.904227  | -0.272639 | -4.849352 |
| 1 | 1.761315  | -1.960711 | -4.312897 |
| 1 | 2.230099  | -1.592149 | -5.974264 |
| 6 | 4.568435  | -0.348395 | -5.565718 |
| 1 | 4.399734  | -0.694860 | -6.592844 |
| 1 | 5.644671  | -0.323821 | -5.384183 |
| 1 | 4.179373  | 0.674282  | -5.489670 |
| 6 | 6.996581  | 0.671977  | -0.903210 |
| 6 | 6.809347  | 2.166451  | -0.518667 |
| 1 | 6.081804  | 2.318958  | 0.283021  |
| 1 | 6.488863  | 2.755902  | -1.385666 |
| 1 | 7.764753  | 2.575993  | -0.171428 |
| 6 | 8.140781  | 0.658646  | -1.943324 |
| 1 | 7.838703  | 1.128025  | -2.884181 |
| 1 | 8.514819  | -0.340588 | -2.167072 |
| 1 | 8.980081  | 1.234091  | -1.535211 |
| 6 | 7.450104  | -0.102456 | 0.356885  |
| 1 | 7.617458  | -1.163895 | 0.142866  |
| 1 | 6.705653  | -0.038081 | 1.157609  |
| 1 | 8.390590  | 0.314377  | 0.737669  |
| 8 | 6.459646  | -1.100261 | -3.329854 |
| 8 | -5.060082 | -2.768739 | -2.425601 |
| 8 | -5.732059 | 5.885037  | -1.357461 |
| 8 | 4.866094  | 1.101568  | 5.199709  |
| 6 | 6.266240  | 1.161130  | 4.907082  |
| 1 | 6.664867  | 0.180935  | 4.626685  |
| 1 | 6.758071  | 1.495704  | 5.823625  |
| 1 | 6.472969  | 1.873580  | 4.101547  |
| 6 | -5.727366 | 6.075387  | -2.777217 |
| 1 | -6.411791 | 6.902710  | -2.978487 |
| 1 | -6.074340 | 5.181552  | -3.306479 |
| 1 | -4.725864 | 6.332169  | -3.138900 |
| 6 | -3.331285 | 6.747260  | 0.038762  |
| 6 | -1.984784 | 6.866494  | 0.784146  |
| 1 | -1.128879 | 6.613522  | 0.151045  |
| 1 | -1.946418 | 6.226048  | 1.672313  |
| 1 | -1.857198 | 7.902468  | 1.118067  |
| 6 | -4.435267 | 7.224235  | 1.016411  |
| 1 | -5.423126 | 7.199924  | 0.551985  |
| 1 | -4.229539 | 8.254045  | 1.334098  |
| 1 | -4.456956 | 6.595564  | 1.914848  |
| 6 | -3.266497 | 7.708287  | -1.172276 |
| 1 | -2.890527 | 8.685592  | -0.845151 |
| 1 | -4.247103 | 7.868016  | -1.622115 |

|    |           |           |           |
|----|-----------|-----------|-----------|
| 1  | -2.583846 | 7.327163  | -1.940112 |
| 6  | -6.686847 | 2.991001  | -1.301874 |
| 6  | -7.048250 | 1.974196  | -0.184587 |
| 1  | -7.047818 | 2.459671  | 0.798135  |
| 1  | -6.360127 | 1.126137  | -0.139894 |
| 1  | -8.052932 | 1.573267  | -0.363177 |
| 6  | -7.822121 | 4.040280  | -1.279064 |
| 1  | -7.798945 | 4.725378  | -2.126883 |
| 1  | -7.807431 | 4.633991  | -0.360768 |
| 1  | -8.779921 | 3.507438  | -1.320221 |
| 6  | -6.710287 | 2.260650  | -2.665816 |
| 1  | -7.704082 | 1.833623  | -2.849069 |
| 1  | -5.981507 | 1.443052  | -2.699341 |
| 1  | -6.482347 | 2.944374  | -3.491468 |
| 6  | -6.104744 | -2.169160 | -3.201011 |
| 1  | -6.799737 | -2.973800 | -3.451889 |
| 1  | -5.721531 | -1.725094 | -4.124436 |
| 1  | -6.630811 | -1.397931 | -2.628420 |
| 6  | 7.011002  | -2.310153 | -2.795643 |
| 1  | 7.800499  | -2.617213 | -3.485202 |
| 1  | 6.251818  | -3.097554 | -2.734474 |
| 1  | 7.439785  | -2.155269 | -1.800740 |
| 1  | 0.179453  | 1.043402  | -2.092644 |
| 45 | 0.412215  | 2.209819  | -1.085380 |
| 17 | 0.754033  | 4.178999  | 0.456659  |
| 7  | -0.058654 | 5.892451  | -3.187898 |
| 7  | 0.912096  | 5.004265  | -2.832836 |
| 7  | 3.098486  | 4.942302  | -1.799957 |
| 6  | 0.410943  | 7.072566  | -2.805528 |
| 6  | 1.685621  | 6.977421  | -2.192515 |
| 6  | 1.992046  | 5.608190  | -2.213005 |
| 6  | 3.072679  | 3.645299  | -1.989285 |
| 1  | 3.950218  | 3.084687  | -1.676353 |
| 6  | 1.997341  | 2.918769  | -2.595494 |
| 1  | 2.228903  | 1.956531  | -3.032400 |
| 6  | 0.836402  | 3.620925  | -3.072791 |
| 6  | 0.150050  | 3.212883  | -4.354126 |
| 6  | -1.241118 | 3.242532  | -4.512495 |
| 1  | -1.872213 | 3.510231  | -3.671196 |
| 6  | -1.814946 | 2.926786  | -5.743675 |
| 1  | -2.895025 | 2.956143  | -5.855015 |
| 6  | -1.006853 | 2.572941  | -6.828512 |
| 1  | -1.457214 | 2.324706  | -7.785407 |
| 6  | 0.379600  | 2.540133  | -6.676558 |



|            |    |           |           |           |  |
|------------|----|-----------|-----------|-----------|--|
|            | 1  | 1.016907  | 2.269295  | -7.513377 |  |
|            | 6  | 0.957466  | 2.862946  | -5.446223 |  |
|            | 1  | 2.038280  | 2.856674  | -5.340506 |  |
|            | 6  | 2.487257  | 8.018064  | -1.674449 |  |
|            | 7  | 3.140251  | 8.888557  | -1.256629 |  |
|            | 1  | -0.171861 | 7.967464  | -2.977018 |  |
| <b>TSb</b> | 6  | -0.643688 | -2.770059 | 0.789649  |  |
|            | 6  | -0.058307 | -1.509942 | 0.822269  |  |
|            | 6  | 0.929928  | -1.268867 | -0.183372 |  |
|            | 6  | 1.134507  | -2.202779 | -1.207126 |  |
|            | 6  | 0.494716  | -3.453862 | -1.233675 |  |
|            | 6  | -0.362786 | -3.723464 | -0.189389 |  |
|            | 1  | 1.809768  | -1.965954 | -2.019846 |  |
|            | 1  | 0.679722  | -4.170131 | -2.026220 |  |
|            | 6  | -0.499632 | -0.542729 | 1.875341  |  |
|            | 6  | -1.160413 | 0.715077  | 1.650531  |  |
|            | 6  | -0.355895 | -0.910280 | 3.205319  |  |
|            | 6  | -1.595195 | 1.478183  | 2.740538  |  |
|            | 6  | -0.793916 | -0.131633 | 4.276203  |  |
|            | 6  | -1.422161 | 1.076672  | 4.077082  |  |
|            | 1  | -2.112055 | 2.412144  | 2.561823  |  |
|            | 1  | -1.774484 | 1.684437  | 4.902811  |  |
|            | 8  | -1.595740 | -3.276137 | 1.643943  |  |
|            | 8  | -1.101103 | -4.855354 | 0.041326  |  |
|            | 8  | -0.489488 | -0.746027 | 5.458001  |  |
|            | 8  | 0.243470  | -2.045508 | 3.689026  |  |
|            | 6  | -1.623968 | -4.682107 | 1.364423  |  |
|            | 6  | 0.042765  | -2.032617 | 5.109030  |  |
|            | 1  | 1.000395  | -2.178366 | 5.613322  |  |
|            | 1  | -0.677034 | -2.812510 | 5.384179  |  |
|            | 1  | -2.650944 | -5.042039 | 1.400795  |  |
|            | 1  | -0.982469 | -5.208731 | 2.083787  |  |
|            | 15 | 1.821817  | 0.345460  | -0.196414 |  |
|            | 15 | -1.525009 | 1.327901  | -0.066981 |  |
|            | 6  | 3.515198  | 0.120345  | -0.930441 |  |
|            | 6  | 4.238503  | 1.301399  | -1.122523 |  |
|            | 6  | 4.157651  | -1.098350 | -1.168687 |  |
|            | 6  | 5.595382  | 1.313019  | -1.488760 |  |
|            | 1  | 3.731436  | 2.244908  | -0.953428 |  |
|            | 6  | 5.506136  | -1.166920 | -1.542191 |  |
|            | 1  | 3.611128  | -2.019372 | -1.042418 |  |
|            | 6  | 6.232810  | 0.052137  | -1.599122 |  |
|            | 6  | 2.404110  | 0.529855  | 1.561634  |  |
|            | 6  | 2.259650  | 1.696696  | 2.311971  |  |

|   |           |           |           |
|---|-----------|-----------|-----------|
| 6 | 3.123219  | -0.537945 | 2.104626  |
| 6 | 2.874858  | 1.839905  | 3.566808  |
| 1 | 1.676926  | 2.506662  | 1.896947  |
| 6 | 3.766731  | -0.468873 | 3.346552  |
| 1 | 3.193976  | -1.455262 | 1.535650  |
| 6 | 3.699040  | 0.777063  | 4.023577  |
| 6 | -2.622890 | 2.812832  | 0.130399  |
| 6 | -3.966116 | 2.763059  | -0.243565 |
| 6 | -2.115614 | 4.019606  | 0.640107  |
| 6 | -4.814707 | 3.883191  | -0.184386 |
| 1 | -4.375274 | 1.826824  | -0.594852 |
| 6 | -2.902644 | 5.173864  | 0.726423  |
| 1 | -1.078809 | 4.059493  | 0.943434  |
| 6 | -4.224343 | 5.105360  | 0.204925  |
| 6 | -2.708703 | 0.033283  | -0.664001 |
| 6 | -2.789051 | -0.352190 | -1.999521 |
| 6 | -3.604755 | -0.540869 | 0.252553  |
| 6 | -3.768764 | -1.248674 | -2.469559 |
| 1 | -2.060621 | 0.046669  | -2.694265 |
| 6 | -4.634292 | -1.396765 | -0.147696 |
| 1 | -3.499019 | -0.296364 | 1.300113  |
| 6 | -4.754564 | -1.656721 | -1.541311 |
| 1 | -0.701548 | 2.629146  | -2.372394 |
| 6 | -3.645763 | -1.734656 | -3.942051 |
| 6 | -4.078783 | -0.608471 | -4.909646 |
| 1 | -5.138449 | -0.356654 | -4.794591 |
| 1 | -3.920598 | -0.921319 | -5.949048 |
| 1 | -3.499601 | 0.304935  | -4.740481 |
| 6 | -4.433361 | -3.024354 | -4.273514 |
| 1 | -5.513366 | -2.882793 | -4.306261 |
| 1 | -4.216985 | -3.822289 | -3.556256 |
| 1 | -4.120419 | -3.371262 | -5.265412 |
| 6 | -2.158103 | -2.082305 | -4.224499 |
| 1 | -1.798061 | -2.851607 | -3.531987 |
| 1 | -1.491549 | -1.220549 | -4.145517 |
| 1 | -2.061786 | -2.469310 | -5.244948 |
| 6 | -5.535629 | -2.087408 | 0.911676  |
| 6 | -5.064078 | -1.764802 | 2.347229  |
| 1 | -5.170310 | -0.701254 | 2.590585  |
| 1 | -4.021518 | -2.056968 | 2.510761  |
| 1 | -5.682785 | -2.324275 | 3.057557  |
| 6 | -5.442768 | -3.622984 | 0.735005  |
| 1 | -5.806000 | -3.936916 | -0.244929 |
| 1 | -6.041774 | -4.124482 | 1.505080  |

|   |           |           |           |
|---|-----------|-----------|-----------|
| 1 | -4.405767 | -3.956157 | 0.842486  |
| 6 | -7.018521 | -1.658011 | 0.813745  |
| 1 | -7.574200 | -2.074205 | 1.662976  |
| 1 | -7.491760 | -2.024028 | -0.097750 |
| 1 | -7.123411 | -0.568140 | 0.851376  |
| 6 | 4.496817  | -1.746263 | 3.851961  |
| 6 | 2.612681  | 3.113329  | 4.414873  |
| 6 | 3.881793  | 3.987806  | 4.552496  |
| 1 | 4.311324  | 4.215009  | 3.569673  |
| 1 | 4.649470  | 3.514732  | 5.164842  |
| 1 | 3.621489  | 4.940400  | 5.030477  |
| 6 | 1.528146  | 4.003402  | 3.770343  |
| 1 | 0.587364  | 3.460679  | 3.631004  |
| 1 | 1.834637  | 4.406059  | 2.800002  |
| 1 | 1.328323  | 4.853207  | 4.432834  |
| 6 | 2.090656  | 2.721439  | 5.820172  |
| 1 | 1.159288  | 2.148357  | 5.740194  |
| 1 | 1.877833  | 3.627963  | 6.400722  |
| 1 | 2.817449  | 2.121983  | 6.369902  |
| 6 | 5.944513  | -1.782956 | 3.301161  |
| 1 | 6.447472  | -2.703669 | 3.622559  |
| 1 | 6.547313  | -0.936837 | 3.639927  |
| 1 | 5.937024  | -1.765985 | 2.204975  |
| 6 | 4.504383  | -1.880702 | 5.393198  |
| 1 | 5.078524  | -1.105808 | 5.896961  |
| 1 | 4.934874  | -2.851744 | 5.664444  |
| 1 | 3.483542  | -1.844597 | 5.792058  |
| 6 | 3.783132  | -3.020538 | 3.323963  |
| 1 | 3.918246  | -3.166952 | 2.247564  |
| 1 | 2.708478  | -2.996662 | 3.530415  |
| 1 | 4.210731  | -3.901016 | 3.816104  |
| 6 | 6.126000  | -2.531775 | -1.947341 |
| 6 | 7.266827  | -2.979512 | -1.002695 |
| 1 | 6.944446  | -2.964711 | 0.045401  |
| 1 | 8.154426  | -2.355581 | -1.104108 |
| 1 | 7.559125  | -4.008465 | -1.245161 |
| 6 | 5.072725  | -3.662534 | -1.935599 |
| 1 | 4.226922  | -3.450606 | -2.599072 |
| 1 | 4.683212  | -3.860609 | -0.930008 |
| 1 | 5.542756  | -4.586546 | -2.289447 |
| 6 | 6.664997  | -2.428635 | -3.396511 |
| 1 | 7.095228  | -3.390169 | -3.702828 |
| 1 | 7.438322  | -1.662754 | -3.480428 |
| 1 | 5.855816  | -2.185324 | -4.095332 |

|   |           |           |           |
|---|-----------|-----------|-----------|
| 6 | 6.257850  | 2.699346  | -1.741045 |
| 6 | 5.262118  | 3.619546  | -2.498394 |
| 1 | 4.379960  | 3.874823  | -1.905091 |
| 1 | 4.932198  | 3.159228  | -3.437034 |
| 1 | 5.759807  | 4.563837  | -2.744971 |
| 6 | 7.527022  | 2.655741  | -2.625421 |
| 1 | 7.346059  | 2.108993  | -3.556725 |
| 1 | 8.388706  | 2.206211  | -2.134321 |
| 1 | 7.800930  | 3.684289  | -2.888023 |
| 6 | 6.585034  | 3.380893  | -0.389254 |
| 1 | 7.307842  | 2.807101  | 0.199287  |
| 1 | 5.681303  | 3.501948  | 0.218473  |
| 1 | 7.010337  | 4.376810  | -0.563757 |
| 8 | 7.598268  | -0.034840 | -1.809347 |
| 8 | -5.860354 | -2.375524 | -1.958195 |
| 8 | -4.945147 | 6.284736  | 0.121377  |
| 8 | 4.395359  | 0.980984  | 5.204683  |
| 6 | 5.789061  | 1.288376  | 5.097267  |
| 1 | 6.400803  | 0.382399  | 5.154428  |
| 1 | 6.040197  | 1.929524  | 5.946571  |
| 1 | 6.011987  | 1.817568  | 4.165260  |
| 6 | -5.004042 | 6.845358  | -1.194112 |
| 1 | -5.581729 | 7.768679  | -1.109328 |
| 1 | -5.498675 | 6.172148  | -1.901394 |
| 1 | -4.001455 | 7.076474  | -1.568925 |
| 6 | -2.364660 | 6.440611  | 1.443620  |
| 6 | -0.973951 | 6.188858  | 2.062715  |
| 1 | -0.213845 | 5.970219  | 1.306075  |
| 1 | -0.988382 | 5.361918  | 2.781025  |
| 1 | -0.659796 | 7.088537  | 2.603947  |
| 6 | -3.321747 | 6.809039  | 2.605561  |
| 1 | -4.326797 | 7.033330  | 2.242929  |
| 1 | -2.940236 | 7.692049  | 3.133237  |
| 1 | -3.387256 | 5.988547  | 3.330371  |
| 6 | -2.219571 | 7.654071  | 0.494036  |
| 1 | -1.679534 | 8.457404  | 1.010178  |
| 1 | -3.186549 | 8.055440  | 0.188500  |
| 1 | -1.646296 | 7.390025  | -0.401764 |
| 6 | -6.318117 | 3.639535  | -0.504344 |
| 6 | -6.790851 | 2.394545  | 0.295099  |
| 1 | -6.672333 | 2.554958  | 1.373005  |
| 1 | -6.248771 | 1.484054  | 0.028553  |
| 1 | -7.853078 | 2.212332  | 0.094775  |
| 6 | -7.283601 | 4.775524  | -0.092714 |

|    |           |           |           |
|----|-----------|-----------|-----------|
| 1  | -7.195487 | 5.668736  | -0.711089 |
| 1  | -7.142307 | 5.069131  | 0.951500  |
| 1  | -8.310612 | 4.406911  | -0.202948 |
| 6  | -6.495963 | 3.350714  | -2.014453 |
| 1  | -7.548148 | 3.133701  | -2.236507 |
| 1  | -5.900290 | 2.487651  | -2.332076 |
| 1  | -6.194244 | 4.206794  | -2.628178 |
| 6  | -6.893423 | -1.587414 | -2.560398 |
| 1  | -7.740220 | -2.260112 | -2.714330 |
| 1  | -6.580781 | -1.176715 | -3.525078 |
| 1  | -7.195975 | -0.763224 | -1.905319 |
| 6  | 8.401076  | 0.117638  | -0.632626 |
| 1  | 9.409300  | -0.203786 | -0.904566 |
| 1  | 8.027025  | -0.504993 | 0.186736  |
| 1  | 8.436574  | 1.159068  | -0.299473 |
| 1  | -0.094999 | 0.530917  | -2.164926 |
| 45 | 0.338630  | 1.802758  | -1.396382 |
| 17 | 1.257858  | 3.922745  | -0.278460 |
| 7  | -1.421790 | 2.690135  | -5.227544 |
| 7  | -0.247680 | 2.311675  | -4.649241 |
| 7  | 1.487339  | 0.643092  | -4.868712 |
| 6  | -1.610267 | 1.819046  | -6.209449 |
| 6  | -0.575274 | 0.852957  | -6.283115 |
| 6  | 0.308046  | 1.194794  | -5.246223 |
| 6  | 2.103838  | 1.258016  | -3.883746 |
| 1  | 3.065907  | 0.853708  | -3.583472 |
| 6  | 1.621392  | 2.420181  | -3.200339 |
| 1  | 2.325383  | 3.045436  | -2.669826 |
| 6  | 0.361719  | 3.002533  | -3.579691 |
| 6  | 0.148694  | 4.492815  | -3.570252 |
| 6  | 1.215250  | 5.312167  | -3.965322 |
| 1  | 2.175538  | 4.870752  | -4.212653 |
| 6  | 1.046143  | 6.694784  | -4.060245 |
| 1  | 1.882105  | 7.317380  | -4.365776 |
| 6  | -0.190743 | 7.269199  | -3.767269 |
| 1  | -0.325376 | 8.344595  | -3.842227 |
| 6  | -1.257262 | 6.454338  | -3.376190 |
| 1  | -2.224081 | 6.894898  | -3.151916 |
| 6  | -1.090172 | 5.074543  | -3.275362 |
| 1  | -1.917976 | 4.448320  | -2.960557 |
| 6  | -0.442085 | -0.220400 | -7.191268 |
| 7  | -0.347008 | -1.104000 | -7.945488 |
| 1  | -2.482860 | 1.899470  | -6.843476 |

## References

- [1] a) D. Bandyopadhyay, A. Thirupathi, D. Radhakrishnan, A. Panigrahi and S. Peruncheralathan, *Org. Biomol. Chem.*, 2021, **19**, 8544-8553. b) W. Li, Y. Yang, Z. Tang, X. Yu, J. Lin and Y. Jin, *J. Org. Chem.*, 2022, **87**, 13352-13362.
- [2] A. Kulkarni, P. Quang, V. Curry, R. Keyes, W. Zhou, H. Cho, J. Baffoe, B. Török and K. Stieglitz, *Chem. Biol. Drug Des.*, 2014, **84**, 270-281.
- [3] A. K. Ajeesh Kumar, K. B. Nair, Y. D. Bodke, G. Sambasivam and K. G. Bhat, *Monatsh. Chem.*, 2016, **147**, 2221-2234.
- [4] W. Kong, Y. Zhou and Q. Song, *Adv. Synth. Catal.*, 2018, **360**, 1943-1948.
- [5] J. Hilger, X. Zhang, S. Feng, S. Ro and J. Huang, WO2019108795A1, 2019.
- [6] J. Song and W.-H. Zheng, *Chem. Commun.*, 2022, **58**, 7392-7395.
- [7] J. I. Levin, Z. Li and D. Powell, US20070219183A1, 2007.
- [8] J. Yuan, X. Huang, M. Guo, CN114716442A, 2022.
- [9] G. L. Cantrell, F. W. Moser and R. E. Halvachs, WO2005070931A1, 2005.
- [10] B. M. Khamar, I. A. Modi, M. C. Shukla, V. V. Srinivas, N. K. Kagathara, N. M. Jamaria, S. P. Dange and J. V. Raman, WO2006070244A2, 2006.
- [11] M. H. Attia, E. Z. Elrazaz, S. Z. El-Emam, A. T. Taher, H. A. Abdel-Aziz and K. A. M. Abouzid, *Bioorg. Chem.*, 2020, **94**, 103458.
- [12] Q. Gao, Z. Sun, Q. Xia, R. Li, W. Wang, S. Ma, Y. Chai, M. Wu, W. Hu, P. Ábrányi-Balogh, G. M. Keserű and X. Han, *Org. Lett.*, 2021, **23**, 2664-2669.
- [13] M. A. Mohamed, E. K. A. Abdelall, Y. H. Zaki and A. O. Abdelhamid, *Eur. J. Chem.* 2011, **2**, 509-513.
- [14] J.-C. Castillo, H.-A. Rosero and J. Portilla, *RSC Adv.*, 2017, **7**, 28483-28488.
- [15] T. Gogula, J.-Q. Zhang and H.-B. Zou, *Org. Lett.*, 2019, **21**, 5933-5937.
- [16] S. S. Tseng, J. P. Dusza, H. J. Brabander and J. W. Epstein, EP264773A1, 1988.
- [17] Gaussian 09, Revision D.01, M. J. Frisch, G. W. Trucks, H. B. Schlegel, G. E. Scuseria, M. A. Robb, J. R. Cheeseman, G. Scalmani, V. Barone, B. Mennucci, G. A. Petersson, H. Nakatsuji, M. Caricato, X. Li, H. P. Hratchian, A. F. Izmaylov, J. Bloino, G. Zheng, J. L. Sonnenberg, M. Hada, M. Ehara, K. Toyota, R. Fukuda, J. Hasegawa,

M. Ishida, T. Nakajima, Y. Honda, O. Kitao, H. Nakai, T. Vreven, J. A. Montgomery, Jr., J. E. Peralta, F. Ogliaro, M. Bearpark, J. J. Heyd, E. Brothers, K. N. Kudin, V. N. Staroverov, T. Keith, R. Kobayashi, J. Normand, K. Raghavachari, A. Rendell, J. C. Burant, S. S. Iyengar, J. Tomasi, M. Cossi, N. Rega, J. M. Millam, M. Klene, J. E. Knox, J. B. Cross, V. Bakken, C. Adamo, J. Jaramillo, R. Gomperts, R. E. Stratmann, O. Yazyev, A. J. Austin, R. Cammi, C. Pomelli, J. W. Ochterski, R. L. Martin, K. Morokuma, V. G. Zakrzewski, G. A. Voth, P. Salvador, J. J. Dannenberg, S. Dapprich, A. D. Daniels, O. Farkas, J. B. Foresman, J. V. Ortiz, J. Cioslowski, and D. J. Fox, Gaussian, Inc., Wallingford CT, 2013.

[18] (a) D. Andrae, U. Haeussermann, M. Dolg, H. Stoll, and H. Preuss, *Theor. Chem. Acc.*, 1990, **77**, 123-141; (b) A. Bergner, M. Dolg, W. Kuechle, H. Stoll, and H. Preuss, *Mol. Phys.*, 1993, **80**, 1431-1441.

[19] (a) P. J. Hay and W. R. Wadt, *J. Chem. Phys.*, 1985, **82**, 270-83; (b) P. J. Hay and W. R. Wadt, *J. Chem. Phys.*, 1985, **82**, 270-83; (c) W. R. Wadt and P. J. Hay, *J. Chem. Phys.*, 1985, **82**, 284-98.

[20] (a) M. M. Francl, W. J. Pietro, W. J. Hehre, J. S. Binkley, M. S. Gordon, D. J. DeFrees and J. A. Pople, *J. Chem. Phys.* 1982, **77**, 3654–3665; (b) R. C. Binning Jr. and L. A. Curtiss, *J. Comp. Chem.*, 1990, **11**, 1206-1216.

[21] J. Tomasi, B. Mennucci, and R. Cammi, *Chem. Rev.*, 2005, **105**, 2999-3093.

[22] D.-C. Fang, THERMO; Beijing Normal University: Beijing, 100875, People's Republic of China; free of charge for academic users.
